# Supplementary material for: Molecular characteristics and clinical implications of serine/arginine-rich splicing factors in human cancer
Source: publisher site journal article supplement (doi:10.18632/aging.205241), 2023-11-24
Supplement: Supplementary file [file aging-v15i22-205241-supplementary-material-SD1.pdf]

SUPPLEMENTARY FIGURES

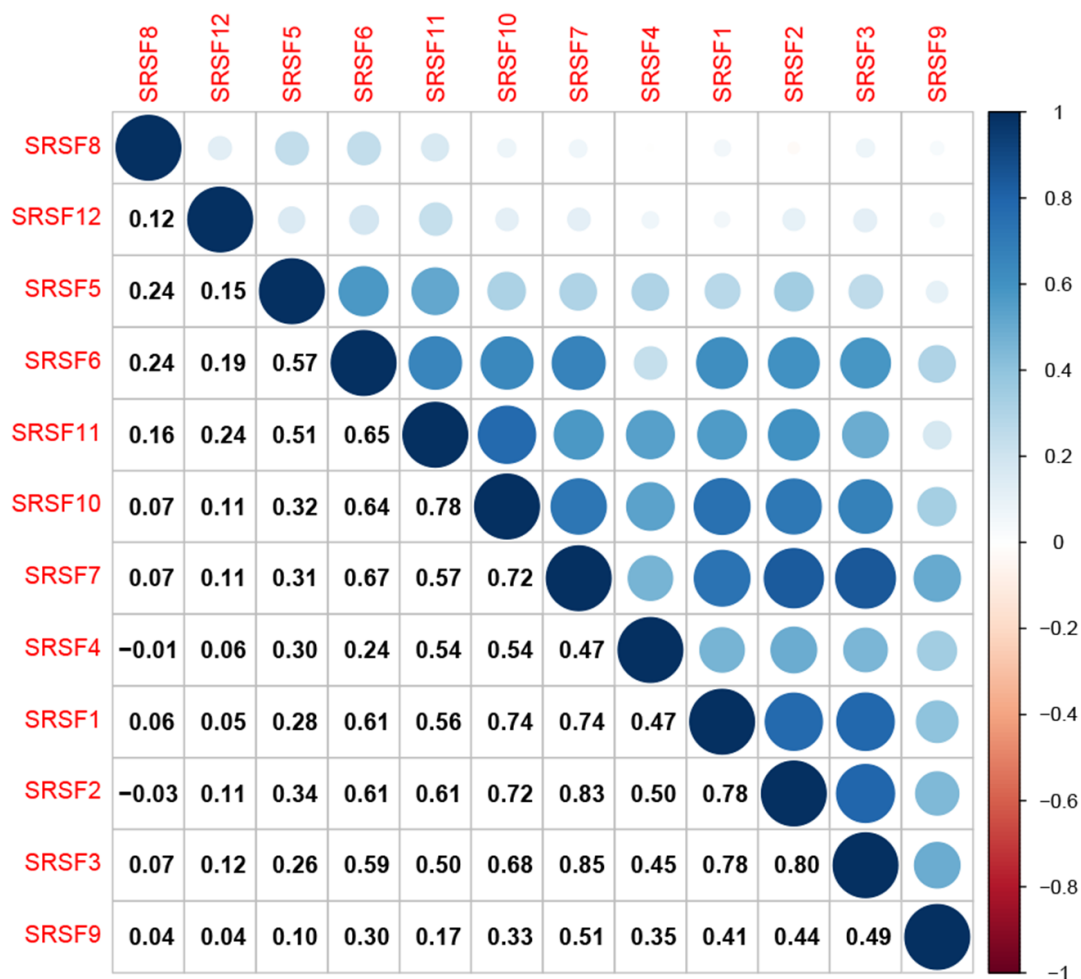

Supplementary Figure 1. Correlation among the SRSFs mRNA expression.

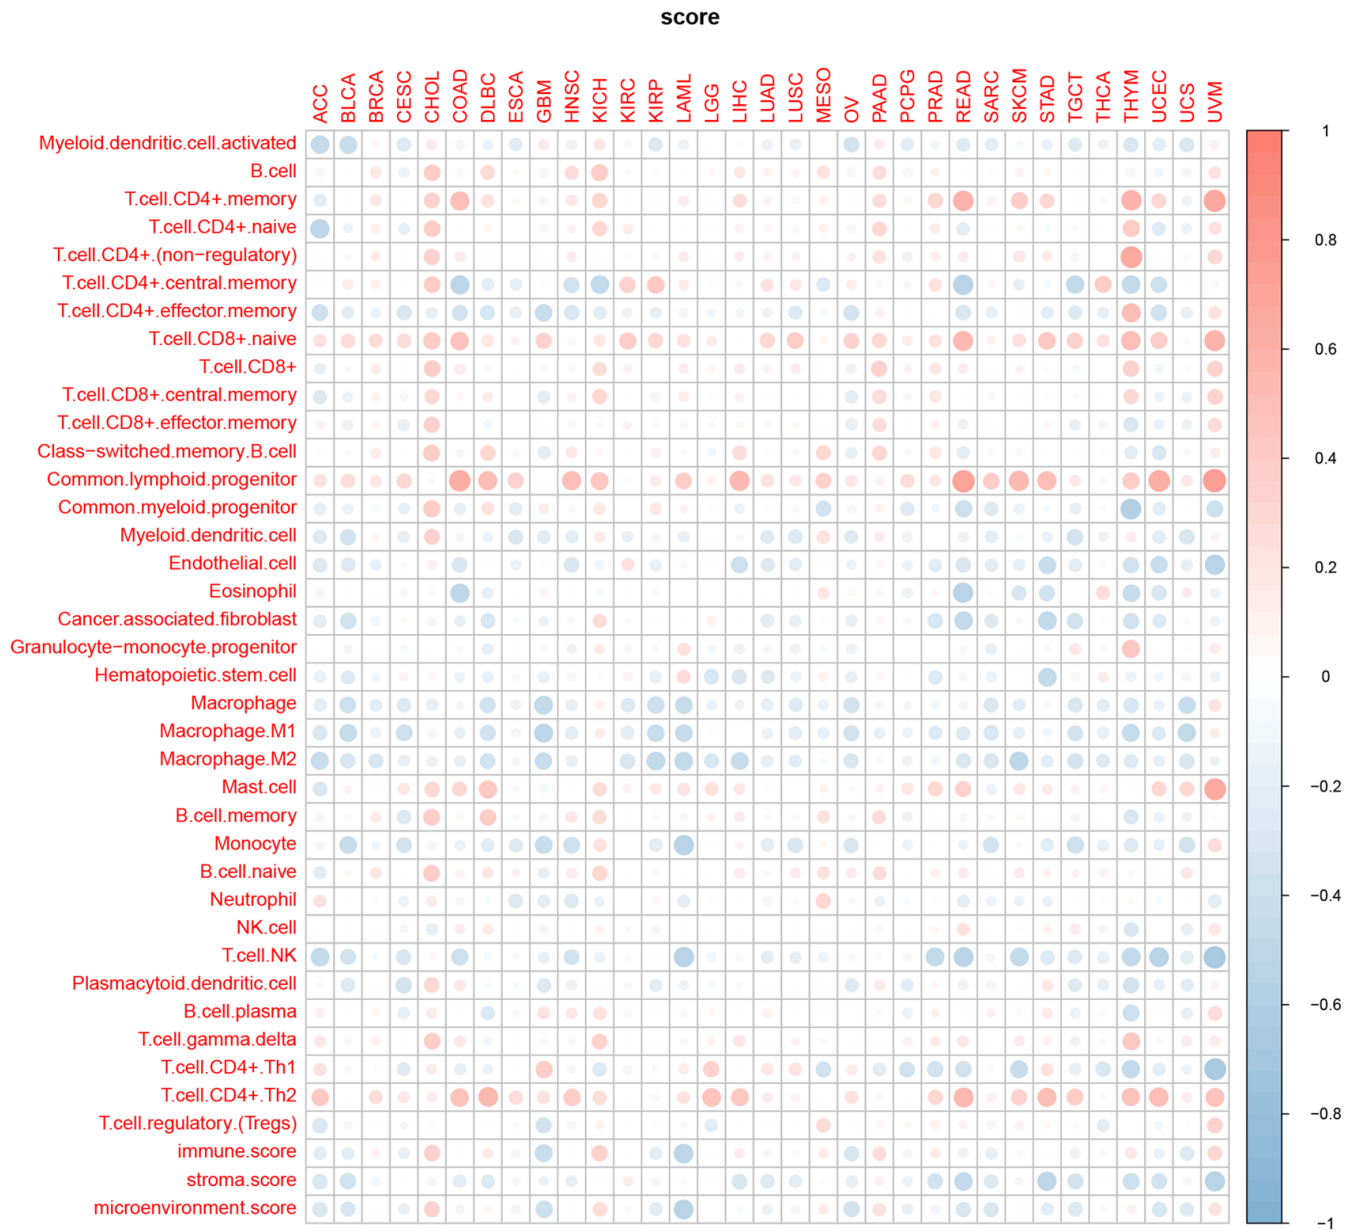

**Supplementary Figure 2. Correlation between the SRSFScore and abundance of immune or stromal cells across 33 cancer types.** The figure only displayed significant dots with  $P$ -value  $< 0.05$ .

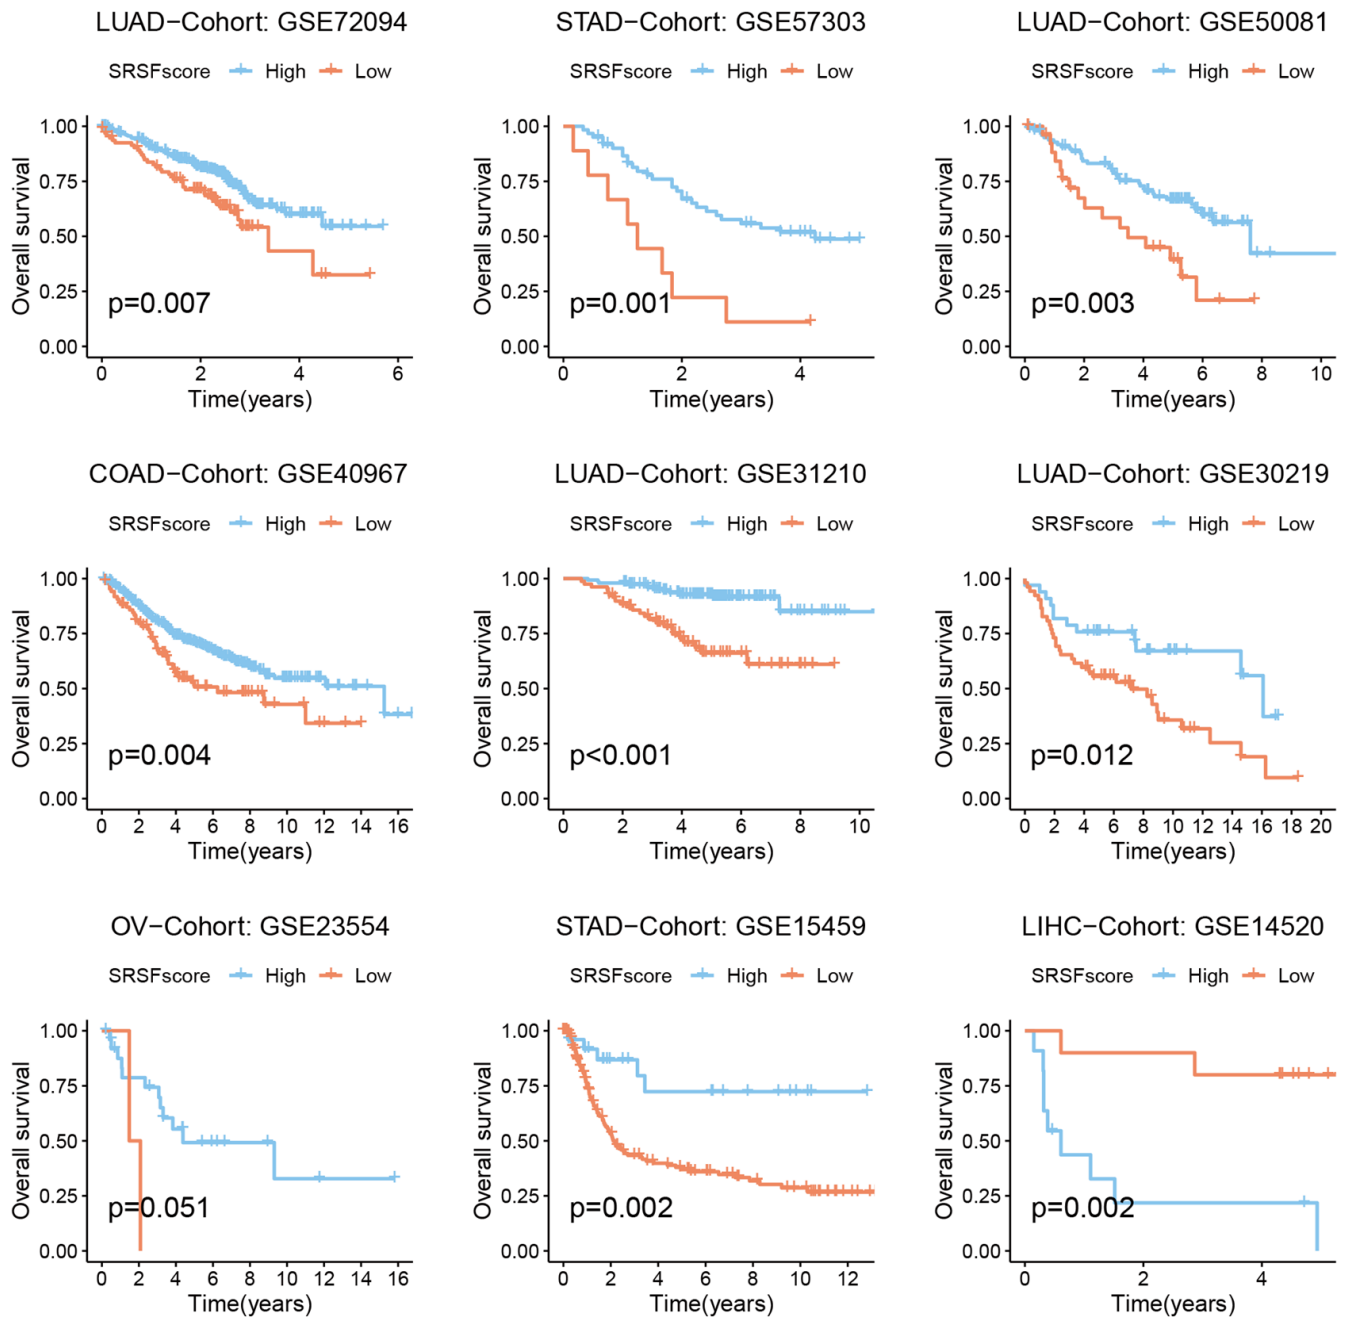

**Supplementary Figure 3. Kaplan-Meier survival curves showing the association of SRSFscore to overall survival.** Statistical significance was assessed by log-rank test.
