# Supplementary material for: Molecular characteristics and clinical implications of serine/arginine-rich splicing factors in human cancer
Source: Aging (Albany NY). 2023 Nov 24;15(22):13287–311. doi: 10.18632/aging.205241 (PMC10713412; doi:10.18632/aging.205241)
Supplement: Supplementary Table 1 [file aging-15-205241-s002.xls]

## Sheet: Table S1
Supplementary Table 1. The association between m6A regulators and SRSFs in 33 cancer types.
Cancer types	m6A.Types	SRSFs	m6A regulators	cor	pvalue
ACC	erasers	SRSF1	ALKBH5	0.338712	0.00226302
ACC	readers	SRSF1	HNRNPA2B1	0.665443	2.23e-11
ACC	readers	SRSF1	HNRNPC	0.586549	1.35e-08
ACC	writers	SRSF1	KIAA1429	0.373473	0.000698547
ACC	readers	SRSF1	LRPPRC	0.265231	0.0181606
ACC	writers	SRSF1	METTL3	0.539299	2.93e-07
ACC	writers	SRSF1	RBM15	0.563237	6.53e-08
ACC	writers	SRSF1	RBM15B	0.241611	0.0319408
ACC	readers	SRSF1	RBMX	0.473803	1.03e-05
ACC	readers	SRSF1	YTHDC1	0.387613	0.000416641
ACC	readers	SRSF1	YTHDF2	0.416806	0.000132891
ACC	readers	SRSF1	YTHDF3	0.376663	0.000622932
ACC	writers	SRSF1	ZC3H13	0.278454	0.0129602
ACC	erasers	SRSF10	ALKBH5	0.264834	0.0183413
ACC	readers	SRSF10	FMR1	0.389455	0.000388858
ACC	erasers	SRSF10	FTO	0.367746	0.0008556
ACC	readers	SRSF10	HNRNPA2B1	0.639647	2.22e-10
ACC	readers	SRSF10	HNRNPC	0.525734	6.51e-07
ACC	readers	SRSF10	IGF2BP1	0.223656	0.0475478
ACC	readers	SRSF10	IGF2BP2	0.253951	0.0239241
ACC	readers	SRSF10	IGF2BP3	0.299968	0.00723501
ACC	writers	SRSF10	KIAA1429	0.633799	3.62e-10
ACC	readers	SRSF10	LRPPRC	0.523043	7.6e-07
ACC	writers	SRSF10	METTL14	0.299236	0.00738525
ACC	writers	SRSF10	METTL3	0.525023	6.79e-07
ACC	writers	SRSF10	RBM15	0.557996	9.16e-08
ACC	writers	SRSF10	RBM15B	0.349047	0.00161749
ACC	readers	SRSF10	RBMX	0.485052	5.89e-06
ACC	writers	SRSF10	WTAP	0.364725	0.000950802
ACC	readers	SRSF10	YTHDC1	0.585218	1.48e-08
ACC	readers	SRSF10	YTHDC2	0.359282	0.00114689
ACC	readers	SRSF10	YTHDF1	0.284094	0.0111696
ACC	readers	SRSF10	YTHDF2	0.6088	2.64e-09
ACC	readers	SRSF10	YTHDF3	0.612171	2.04e-09
ACC	writers	SRSF10	ZC3H13	0.548496	1.67e-07
ACC	erasers	SRSF11	ALKBH5	0.236099	0.0361928
ACC	readers	SRSF11	HNRNPA2B1	0.5969	6.41e-09
ACC	readers	SRSF11	HNRNPC	0.497914	3.03e-06
ACC	readers	SRSF11	IGF2BP2	0.250473	0.0259881
ACC	writers	SRSF11	KIAA1429	0.399693	0.000262979
ACC	readers	SRSF11	LRPPRC	0.318904	0.00417665
ACC	writers	SRSF11	METTL3	0.443852	4.18e-05
ACC	writers	SRSF11	RBM15	0.650091	8.98e-11
ACC	writers	SRSF11	RBM15B	0.351433	0.00149441
ACC	readers	SRSF11	RBMX	0.543921	2.21e-07
ACC	writers	SRSF11	WTAP	0.316425	0.00449715
ACC	readers	SRSF11	YTHDC1	0.501377	2.52e-06
ACC	readers	SRSF11	YTHDF2	0.502298	2.4e-06
ACC	readers	SRSF11	YTHDF3	0.349779	0.00157876
ACC	writers	SRSF11	ZC3H13	0.362082	0.00104184
ACC	erasers	SRSF12	ALKBH5	0.271147	0.0156462
ACC	readers	SRSF12	HNRNPA2B1	0.383072	0.000493118
ACC	readers	SRSF12	IGF2BP1	0.268044	0.0169249
ACC	writers	SRSF12	METTL3	0.252969	0.0244919
ACC	writers	SRSF12	RBM15	0.319236	0.00413542
ACC	readers	SRSF12	YTHDF2	0.324189	0.00356045
ACC	erasers	SRSF2	ALKBH5	0.468644	1.33e-05
ACC	readers	SRSF2	HNRNPA2B1	0.808448	2.09e-19
ACC	readers	SRSF2	HNRNPC	0.698253	8.49e-13
ACC	readers	SRSF2	IGF2BP2	0.325748	0.00339488
ACC	readers	SRSF2	IGF2BP3	0.221927	0.0493364
ACC	writers	SRSF2	KIAA1429	0.372049	0.000734938
ACC	readers	SRSF2	LRPPRC	0.437044	5.65e-05
ACC	writers	SRSF2	METTL3	0.560515	7.79e-08
ACC	writers	SRSF2	RBM15	0.691629	1.7e-12
ACC	writers	SRSF2	RBM15B	0.478299	8.27e-06
ACC	readers	SRSF2	RBMX	0.641887	1.83e-10
ACC	writers	SRSF2	WTAP	0.513505	1.3e-06
ACC	readers	SRSF2	YTHDC1	0.476065	9.23e-06
ACC	readers	SRSF2	YTHDF1	0.228845	0.042499
ACC	readers	SRSF2	YTHDF2	0.631264	4.47e-10
ACC	readers	SRSF2	YTHDF3	0.322296	0.00377116
ACC	erasers	SRSF3	ALKBH5	0.383491	0.000485558
ACC	readers	SRSF3	HNRNPA2B1	0.79556	1.98e-18
ACC	readers	SRSF3	HNRNPC	0.732421	1.71e-14
ACC	readers	SRSF3	IGF2BP2	0.312526	0.00504539
ACC	writers	SRSF3	KIAA1429	0.450812	3.06e-05
ACC	readers	SRSF3	LRPPRC	0.516349	1.11e-06
ACC	writers	SRSF3	METTL3	0.422797	0.000103729
ACC	writers	SRSF3	RBM15	0.674494	9.44e-12
ACC	writers	SRSF3	RBM15B	0.592952	8.53e-09
ACC	readers	SRSF3	RBMX	0.662642	2.89e-11
ACC	writers	SRSF3	WTAP	0.619133	1.19e-09
ACC	readers	SRSF3	YTHDC1	0.457796	2.22e-05
ACC	readers	SRSF3	YTHDF1	0.26281	0.0192855
ACC	readers	SRSF3	YTHDF2	0.654921	5.85e-11
ACC	readers	SRSF3	YTHDF3	0.301436	0.00694187
ACC	erasers	SRSF4	ALKBH5	0.361348	0.00106849
ACC	readers	SRSF4	FMR1	0.294232	0.00848722
ACC	readers	SRSF4	HNRNPA2B1	0.622897	8.8e-10
ACC	readers	SRSF4	HNRNPC	0.55878	8.71e-08
ACC	writers	SRSF4	KIAA1429	0.359441	0.00114068
ACC	readers	SRSF4	LRPPRC	0.230775	0.0407376
ACC	writers	SRSF4	METTL3	0.356112	0.00127728
ACC	writers	SRSF4	RBM15	0.642591	1.72e-10
ACC	writers	SRSF4	RBM15B	0.40071	0.000252781
ACC	readers	SRSF4	RBMX	0.648331	1.05e-10
ACC	writers	SRSF4	WTAP	0.421595	0.000109056
ACC	readers	SRSF4	YTHDC1	0.510419	1.54e-06
ACC	readers	SRSF4	YTHDF1	0.253338	0.0242771
ACC	readers	SRSF4	YTHDF2	0.536472	3.47e-07
ACC	readers	SRSF4	YTHDF3	0.259026	0.0211626
ACC	writers	SRSF4	ZC3H13	0.281141	0.0120781
ACC	erasers	SRSF5	ALKBH5	0.382508	0.000503447
ACC	readers	SRSF5	FMR1	0.279104	0.012742
ACC	erasers	SRSF5	FTO	0.371671	0.000744877
ACC	readers	SRSF5	HNRNPA2B1	0.426302	8.95e-05
ACC	readers	SRSF5	HNRNPC	0.439193	5.14e-05
ACC	readers	SRSF5	IGF2BP2	-0.263336	0.0190362
ACC	writers	SRSF5	KIAA1429	0.270937	0.01573
ACC	readers	SRSF5	LRPPRC	0.264401	0.0185399
ACC	writers	SRSF5	METTL14	0.468325	1.35e-05
ACC	writers	SRSF5	METTL16	0.282343	0.0117009
ACC	writers	SRSF5	METTL3	0.698149	8.59e-13
ACC	writers	SRSF5	RBM15	0.274194	0.0144729
ACC	readers	SRSF5	RBMX	0.415317	0.000141229
ACC	readers	SRSF5	YTHDC1	0.623241	8.56e-10
ACC	readers	SRSF5	YTHDC2	0.391355	0.000361971
ACC	readers	SRSF5	YTHDF1	0.343535	0.00193744
ACC	readers	SRSF5	YTHDF2	0.50327	2.28e-06
ACC	readers	SRSF5	YTHDF3	0.318585	0.00421677
ACC	writers	SRSF5	ZC3H13	0.412832	0.000156229
ACC	erasers	SRSF6	ALKBH5	0.30817	0.00572725
ACC	erasers	SRSF6	FTO	0.224514	0.0466807
ACC	readers	SRSF6	HNRNPA2B1	0.584132	1.59e-08
ACC	readers	SRSF6	HNRNPC	0.502468	2.38e-06
ACC	writers	SRSF6	KIAA1429	0.427894	8.37e-05
ACC	readers	SRSF6	LRPPRC	0.345463	0.00181958
ACC	writers	SRSF6	METTL14	0.264103	0.0186774
ACC	writers	SRSF6	METTL16	0.253261	0.024322
ACC	writers	SRSF6	METTL3	0.541198	2.61e-07
ACC	writers	SRSF6	RBM15	0.322097	0.00379399
ACC	writers	SRSF6	RBM15B	0.384141	0.000474042
ACC	readers	SRSF6	RBMX	0.506465	1.92e-06
ACC	writers	SRSF6	WTAP	0.303008	0.00663974
ACC	readers	SRSF6	YTHDC1	0.469836	1.25e-05
ACC	readers	SRSF6	YTHDC2	0.24266	0.0311818
ACC	readers	SRSF6	YTHDF1	0.432628	6.84e-05
ACC	readers	SRSF6	YTHDF2	0.494498	3.62e-06
ACC	readers	SRSF6	YTHDF3	0.384707	0.000464206
ACC	writers	SRSF6	ZC3H13	0.324963	0.00347737
ACC	erasers	SRSF7	ALKBH5	0.370775	0.00076894
ACC	readers	SRSF7	HNRNPA2B1	0.790953	4.26e-18
ACC	readers	SRSF7	HNRNPC	0.77154	8.75e-17
ACC	readers	SRSF7	IGF2BP2	0.398841	0.000271808
ACC	writers	SRSF7	KIAA1429	0.531011	4.79e-07
ACC	readers	SRSF7	LRPPRC	0.568798	4.53e-08
ACC	writers	SRSF7	METTL3	0.428097	8.3e-05
ACC	writers	SRSF7	RBM15	0.695772	1.1e-12
ACC	writers	SRSF7	RBM15B	0.589396	1.1e-08
ACC	readers	SRSF7	RBMX	0.659755	3.77e-11
ACC	writers	SRSF7	WTAP	0.54012	2.79e-07
ACC	readers	SRSF7	YTHDC1	0.439233	5.13e-05
ACC	readers	SRSF7	YTHDF1	0.291621	0.00911773
ACC	readers	SRSF7	YTHDF2	0.662256	3e-11
ACC	readers	SRSF7	YTHDF3	0.362629	0.00102239
ACC	writers	SRSF7	ZC3H13	0.229232	0.0421406
ACC	erasers	SRSF8	ALKBH5	0.287722	0.010135
ACC	readers	SRSF8	IGF2BP1	0.248328	0.0273353
ACC	readers	SRSF8	IGF2BP3	0.311102	0.00525995
ACC	readers	SRSF8	LRPPRC	0.403408	0.00022747
ACC	writers	SRSF8	METTL14	0.315247	0.00465685
ACC	writers	SRSF8	METTL3	0.317257	0.0043873
ACC	writers	SRSF8	RBM15B	0.250448	0.0260036
ACC	readers	SRSF8	YTHDC1	0.357486	0.00121919
ACC	readers	SRSF8	YTHDC2	0.224253	0.0469424
ACC	readers	SRSF8	YTHDF2	0.350556	0.00153861
ACC	readers	SRSF8	YTHDF3	0.279471	0.01262
ACC	writers	SRSF8	ZC3H13	0.452696	2.8e-05
ACC	erasers	SRSF9	ALKBH5	0.544888	2.08e-07
ACC	readers	SRSF9	FMR1	0.24695	0.0282316
ACC	erasers	SRSF9	FTO	0.346366	0.00176662
ACC	readers	SRSF9	HNRNPA2B1	0.639079	2.33e-10
ACC	readers	SRSF9	HNRNPC	0.725353	4.02e-14
ACC	writers	SRSF9	KIAA1429	0.494166	3.69e-06
ACC	readers	SRSF9	LRPPRC	0.699431	7.49e-13
ACC	writers	SRSF9	METTL14	0.439109	5.16e-05
ACC	writers	SRSF9	METTL16	0.286255	0.010543
ACC	writers	SRSF9	METTL3	0.433547	6.57e-05
ACC	writers	SRSF9	RBM15	0.581057	1.97e-08
ACC	writers	SRSF9	RBM15B	0.569407	4.35e-08
ACC	readers	SRSF9	RBMX	0.658963	4.06e-11
ACC	writers	SRSF9	WTAP	0.594357	7.71e-09
ACC	readers	SRSF9	YTHDC1	0.625477	7.15e-10
ACC	readers	SRSF9	YTHDC2	0.278588	0.0129149
ACC	readers	SRSF9	YTHDF1	0.45675	2.33e-05
ACC	readers	SRSF9	YTHDF2	0.72461	4.4e-14
ACC	readers	SRSF9	YTHDF3	0.493693	3.78e-06
ACC	writers	SRSF9	ZC3H13	0.376894	0.000617761
BLCA	erasers	SRSF1	ALKBH5	0.15585	0.00152792
BLCA	readers	SRSF1	FMR1	0.3412	1.16e-12
BLCA	erasers	SRSF1	FTO	0.115547	0.0191179
BLCA	readers	SRSF1	HNRNPA2B1	0.676095	3.27e-56
BLCA	readers	SRSF1	HNRNPC	0.572788	3.32e-37
BLCA	readers	SRSF1	IGF2BP1	0.0989053	0.0450776
BLCA	writers	SRSF1	KIAA1429	0.354501	1.29e-13
BLCA	readers	SRSF1	LRPPRC	0.373877	4.41e-15
BLCA	writers	SRSF1	METTL14	0.369134	1.03e-14
BLCA	writers	SRSF1	METTL16	0.169979	0.000538704
BLCA	writers	SRSF1	METTL3	0.443683	2.99e-21
BLCA	writers	SRSF1	RBM15	0.32664	1.13e-11
BLCA	writers	SRSF1	RBM15B	0.292941	1.41e-09
BLCA	readers	SRSF1	RBMX	0.676505	2.65e-56
BLCA	writers	SRSF1	WTAP	0.300065	5.35e-10
BLCA	readers	SRSF1	YTHDC1	0.452032	4.33e-22
BLCA	readers	SRSF1	YTHDC2	0.385623	5.07e-16
BLCA	readers	SRSF1	YTHDF1	0.237593	1.1e-06
BLCA	readers	SRSF1	YTHDF2	0.443996	2.78e-21
BLCA	readers	SRSF1	YTHDF3	0.364478	2.34e-14
BLCA	writers	SRSF1	ZC3H13	0.290068	2.07e-09
BLCA	erasers	SRSF10	ALKBH5	0.172372	0.000447796
BLCA	readers	SRSF10	FMR1	0.511585	8.62e-29
BLCA	erasers	SRSF10	FTO	0.252818	2.05e-07
BLCA	readers	SRSF10	HNRNPA2B1	0.649302	1.44e-50
BLCA	readers	SRSF10	HNRNPC	0.457931	1.07e-22
BLCA	readers	SRSF10	IGF2BP1	0.120076	0.0148625
BLCA	readers	SRSF10	IGF2BP3	0.185287	0.000158298
BLCA	writers	SRSF10	KIAA1429	0.501011	1.67e-27
BLCA	readers	SRSF10	LRPPRC	0.424857	1.92e-19
BLCA	writers	SRSF10	METTL14	0.467615	1.02e-23
BLCA	writers	SRSF10	METTL16	0.214323	1.17e-05
BLCA	writers	SRSF10	METTL3	0.524469	2.01e-30
BLCA	writers	SRSF10	RBM15	0.447969	1.11e-21
BLCA	writers	SRSF10	RBM15B	0.333952	3.65e-12
BLCA	readers	SRSF10	RBMX	0.606657	1.13e-42
BLCA	writers	SRSF10	WTAP	0.347771	3.97e-13
BLCA	readers	SRSF10	YTHDC1	0.655459	8.17e-52
BLCA	readers	SRSF10	YTHDC2	0.493925	1.15e-26
BLCA	readers	SRSF10	YTHDF1	0.331593	5.27e-12
BLCA	readers	SRSF10	YTHDF2	0.585104	4.05e-39
BLCA	readers	SRSF10	YTHDF3	0.561686	1.51e-35
BLCA	writers	SRSF10	ZC3H13	0.456565	1.48e-22
BLCA	readers	SRSF11	FMR1	0.363496	2.77e-14
BLCA	readers	SRSF11	HNRNPA2B1	0.304568	2.86e-10
BLCA	readers	SRSF11	HNRNPC	0.0971168	0.0491235
BLCA	readers	SRSF11	IGF2BP2	-0.201404	3.91e-05
BLCA	writers	SRSF11	KIAA1429	0.187713	0.000129182
BLCA	writers	SRSF11	METTL14	0.319554	3.28e-11
BLCA	writers	SRSF11	METTL3	0.572274	3.98e-37
BLCA	writers	SRSF11	RBM15	0.150267	0.00225458
BLCA	writers	SRSF11	RBM15B	0.182495	0.000199406
BLCA	readers	SRSF11	RBMX	0.338197	1.87e-12
BLCA	writers	SRSF11	WTAP	0.199893	4.48e-05
BLCA	readers	SRSF11	YTHDC1	0.655131	9.54e-52
BLCA	readers	SRSF11	YTHDC2	0.501938	1.29e-27
BLCA	readers	SRSF11	YTHDF1	0.244382	5.29e-07
BLCA	readers	SRSF11	YTHDF2	0.392472	1.38e-16
BLCA	readers	SRSF11	YTHDF3	0.360049	5.03e-14
BLCA	writers	SRSF11	ZC3H13	0.384909	5.8e-16
BLCA	erasers	SRSF12	ALKBH5	0.299512	5.78e-10
BLCA	erasers	SRSF12	FTO	0.289126	2.35e-09
BLCA	readers	SRSF12	HNRNPA2B1	0.189772	0.000108485
BLCA	readers	SRSF12	HNRNPC	0.266282	4.22e-08
BLCA	readers	SRSF12	IGF2BP1	0.234898	1.47e-06
BLCA	readers	SRSF12	IGF2BP2	0.188213	0.000123837
BLCA	writers	SRSF12	KIAA1429	0.224356	4.36e-06
BLCA	readers	SRSF12	LRPPRC	0.170764	0.000507142
BLCA	writers	SRSF12	METTL14	0.125063	0.0111597
BLCA	writers	SRSF12	METTL16	0.202651	3.49e-05
BLCA	writers	SRSF12	RBM15	0.23663	1.22e-06
BLCA	readers	SRSF12	RBMX	0.356872	8.66e-14
BLCA	writers	SRSF12	WTAP	0.379177	1.68e-15
BLCA	readers	SRSF12	YTHDF3	0.124558	0.0114927
BLCA	erasers	SRSF2	ALKBH5	0.100406	0.0419023
BLCA	readers	SRSF2	FMR1	0.312819	8.81e-11
BLCA	readers	SRSF2	HNRNPA2B1	0.645661	7.62e-50
BLCA	readers	SRSF2	HNRNPC	0.462808	3.3e-23
BLCA	writers	SRSF2	KIAA1429	0.1373	0.00529953
BLCA	readers	SRSF2	LRPPRC	0.252425	2.15e-07
BLCA	writers	SRSF2	METTL14	0.281256	6.55e-09
BLCA	writers	SRSF2	METTL3	0.53525	7.67e-32
BLCA	writers	SRSF2	RBM15	0.223974	4.54e-06
BLCA	writers	SRSF2	RBM15B	0.201582	3.85e-05
BLCA	readers	SRSF2	RBMX	0.625606	4.97e-46
BLCA	writers	SRSF2	WTAP	0.361538	3.89e-14
BLCA	readers	SRSF2	YTHDC1	0.419117	6.49e-19
BLCA	readers	SRSF2	YTHDC2	0.356424	9.34e-14
BLCA	readers	SRSF2	YTHDF1	0.289674	2.18e-09
BLCA	readers	SRSF2	YTHDF2	0.334857	3.17e-12
BLCA	readers	SRSF2	YTHDF3	0.208935	1.95e-05
BLCA	writers	SRSF2	ZC3H13	0.114186	0.020589
BLCA	erasers	SRSF3	ALKBH5	0.289785	2.15e-09
BLCA	readers	SRSF3	FMR1	0.311363	1.09e-10
BLCA	erasers	SRSF3	FTO	0.108576	0.0277368
BLCA	readers	SRSF3	HNRNPA2B1	0.653594	1.96e-51
BLCA	readers	SRSF3	HNRNPC	0.648002	2.62e-50
BLCA	writers	SRSF3	KIAA1429	0.231529	2.09e-06
BLCA	readers	SRSF3	LRPPRC	0.368878	1.08e-14
BLCA	writers	SRSF3	METTL14	0.361706	3.78e-14
BLCA	writers	SRSF3	METTL16	0.226487	3.52e-06
BLCA	writers	SRSF3	METTL3	0.260813	8.12e-08
BLCA	writers	SRSF3	RBM15	0.345126	6.12e-13
BLCA	writers	SRSF3	RBM15B	0.240056	8.48e-07
BLCA	readers	SRSF3	RBMX	0.732659	2.41e-70
BLCA	writers	SRSF3	WTAP	0.432855	3.38e-20
BLCA	readers	SRSF3	YTHDC1	0.296846	8.33e-10
BLCA	readers	SRSF3	YTHDC2	0.194292	7.35e-05
BLCA	readers	SRSF3	YTHDF1	0.252291	2.18e-07
BLCA	readers	SRSF3	YTHDF2	0.383934	6.96e-16
BLCA	readers	SRSF3	YTHDF3	0.216078	9.89e-06
BLCA	writers	SRSF3	ZC3H13	0.125626	0.0107977
BLCA	erasers	SRSF4	ALKBH5	0.174762	0.000371394
BLCA	readers	SRSF4	FMR1	0.369151	1.03e-14
BLCA	readers	SRSF4	HNRNPA2B1	0.442791	3.66e-21
BLCA	readers	SRSF4	HNRNPC	0.228151	2.97e-06
BLCA	readers	SRSF4	IGF2BP1	-0.109148	0.0269221
BLCA	readers	SRSF4	IGF2BP2	-0.134081	0.00648373
BLCA	writers	SRSF4	METTL14	0.26256	6.6e-08
BLCA	writers	SRSF4	METTL3	0.394167	9.96e-17
BLCA	writers	SRSF4	RBM15B	0.295769	9.64e-10
BLCA	readers	SRSF4	RBMX	0.362785	3.14e-14
BLCA	writers	SRSF4	WTAP	0.204129	3.05e-05
BLCA	readers	SRSF4	YTHDC1	0.485303	1.13e-25
BLCA	readers	SRSF4	YTHDC2	0.202419	3.56e-05
BLCA	readers	SRSF4	YTHDF1	0.159831	0.00114863
BLCA	readers	SRSF4	YTHDF2	0.536239	5.65e-32
BLCA	readers	SRSF4	YTHDF3	0.106378	0.0310706
BLCA	writers	SRSF4	ZC3H13	0.257727	1.17e-07
BLCA	erasers	SRSF5	FTO	-0.10371	0.0355716
BLCA	readers	SRSF5	IGF2BP1	-0.123371	0.0123118
BLCA	readers	SRSF5	IGF2BP2	-0.378416	1.93e-15
BLCA	readers	SRSF5	IGF2BP3	-0.186489	0.000143179
BLCA	writers	SRSF5	METTL14	0.156157	0.00149497
BLCA	writers	SRSF5	METTL3	0.529339	4.67e-31
BLCA	writers	SRSF5	RBM15B	0.12241	0.0130126
BLCA	readers	SRSF5	RBMX	0.23542	1.39e-06
BLCA	writers	SRSF5	WTAP	0.152053	0.00199347
BLCA	readers	SRSF5	YTHDC1	0.383804	7.13e-16
BLCA	readers	SRSF5	YTHDC2	0.336806	2.33e-12
BLCA	readers	SRSF5	YTHDF2	0.138962	0.00476777
BLCA	readers	SRSF5	YTHDF3	0.0975571	0.0481002
BLCA	writers	SRSF5	ZC3H13	0.125984	0.010573
BLCA	readers	SRSF6	FMR1	0.204279	3.01e-05
BLCA	readers	SRSF6	HNRNPA2B1	0.25843	1.07e-07
BLCA	readers	SRSF6	HNRNPC	0.169037	0.000578999
BLCA	readers	SRSF6	IGF2BP2	-0.284005	4.59e-09
BLCA	writers	SRSF6	KIAA1429	0.163493	0.00087841
BLCA	readers	SRSF6	LRPPRC	0.128329	0.00920099
BLCA	writers	SRSF6	METTL14	0.340911	1.21e-12
BLCA	writers	SRSF6	METTL16	0.197737	5.43e-05
BLCA	writers	SRSF6	METTL3	0.566652	2.79e-36
BLCA	writers	SRSF6	RBM15	0.121355	0.0138216
BLCA	writers	SRSF6	RBM15B	0.245947	4.45e-07
BLCA	readers	SRSF6	RBMX	0.462746	3.35e-23
BLCA	writers	SRSF6	WTAP	0.250884	2.56e-07
BLCA	readers	SRSF6	YTHDC1	0.552239	3.48e-34
BLCA	readers	SRSF6	YTHDC2	0.430201	6.04e-20
BLCA	readers	SRSF6	YTHDF1	0.397273	5.44e-17
BLCA	readers	SRSF6	YTHDF2	0.327092	1.05e-11
BLCA	readers	SRSF6	YTHDF3	0.338146	1.88e-12
BLCA	writers	SRSF6	ZC3H13	0.310327	1.26e-10
BLCA	erasers	SRSF7	ALKBH5	0.194281	7.35e-05
BLCA	readers	SRSF7	FMR1	0.291429	1.73e-09
BLCA	readers	SRSF7	HNRNPA2B1	0.59599	7.01e-41
BLCA	readers	SRSF7	HNRNPC	0.525911	1.31e-30
BLCA	readers	SRSF7	IGF2BP1	0.11879	0.0159762
BLCA	writers	SRSF7	KIAA1429	0.192335	8.71e-05
BLCA	readers	SRSF7	LRPPRC	0.368742	1.1e-14
BLCA	writers	SRSF7	METTL14	0.32284	2.01e-11
BLCA	writers	SRSF7	METTL16	0.174868	0.000368312
BLCA	writers	SRSF7	METTL3	0.452923	3.51e-22
BLCA	writers	SRSF7	RBM15	0.270278	2.6e-08
BLCA	writers	SRSF7	RBM15B	0.287109	3.06e-09
BLCA	readers	SRSF7	RBMX	0.654005	1.62e-51
BLCA	writers	SRSF7	WTAP	0.366635	1.6e-14
BLCA	readers	SRSF7	YTHDC1	0.357062	8.38e-14
BLCA	readers	SRSF7	YTHDC2	0.272129	2.07e-08
BLCA	readers	SRSF7	YTHDF1	0.290223	2.03e-09
BLCA	readers	SRSF7	YTHDF2	0.411222	3.34e-18
BLCA	readers	SRSF7	YTHDF3	0.235016	1.45e-06
BLCA	writers	SRSF7	ZC3H13	0.179045	0.000264001
BLCA	readers	SRSF8	IGF2BP1	-0.18832	0.000122716
BLCA	readers	SRSF8	IGF2BP2	-0.460404	5.91e-23
BLCA	readers	SRSF8	IGF2BP3	-0.211425	1.55e-05
BLCA	writers	SRSF8	METTL3	0.241331	7.38e-07
BLCA	writers	SRSF8	RBM15	-0.180375	0.000237089
BLCA	writers	SRSF8	RBM15B	0.214736	1.13e-05
BLCA	readers	SRSF8	YTHDC1	0.317888	4.2e-11
BLCA	readers	SRSF8	YTHDC2	0.163814	0.000857742
BLCA	readers	SRSF8	YTHDF2	0.141319	0.004096
BLCA	readers	SRSF8	YTHDF3	0.11789	0.0167995
BLCA	writers	SRSF8	ZC3H13	0.190637	0.000100761
BLCA	erasers	SRSF9	ALKBH5	0.313591	7.88e-11
BLCA	readers	SRSF9	FMR1	0.259488	9.49e-08
BLCA	erasers	SRSF9	FTO	0.217375	8.72e-06
BLCA	readers	SRSF9	HNRNPA2B1	0.505461	4.86e-28
BLCA	readers	SRSF9	HNRNPC	0.510042	1.34e-28
BLCA	readers	SRSF9	IGF2BP3	0.105769	0.0320518
BLCA	writers	SRSF9	KIAA1429	0.220918	6.15e-06
BLCA	readers	SRSF9	LRPPRC	0.364219	2.44e-14
BLCA	writers	SRSF9	METTL14	0.283336	5.01e-09
BLCA	writers	SRSF9	METTL3	0.195396	6.67e-05
BLCA	writers	SRSF9	RBM15B	0.275969	1.28e-08
BLCA	readers	SRSF9	RBMX	0.388715	2.83e-16
BLCA	writers	SRSF9	WTAP	0.15581	0.00153218
BLCA	readers	SRSF9	YTHDC1	0.295753	9.66e-10
BLCA	readers	SRSF9	YTHDC2	0.0994122	0.0439831
BLCA	readers	SRSF9	YTHDF1	0.237601	1.1e-06
BLCA	readers	SRSF9	YTHDF2	0.254978	1.6e-07
BLCA	readers	SRSF9	YTHDF3	0.227338	3.23e-06
BLCA	writers	SRSF9	ZC3H13	0.192972	8.24e-05
BRCA	readers	SRSF1	FMR1	0.452517	7.85e-57
BRCA	erasers	SRSF1	FTO	-0.105527	0.000444513
BRCA	readers	SRSF1	HNRNPA2B1	0.559611	5.47e-92
BRCA	readers	SRSF1	HNRNPC	0.455861	9.45e-58
BRCA	writers	SRSF1	KIAA1429	0.29702	6.36e-24
BRCA	readers	SRSF1	LRPPRC	0.433073	1.1e-51
BRCA	writers	SRSF1	METTL14	0.2783	4.37e-21
BRCA	writers	SRSF1	METTL16	0.0941416	0.00173971
BRCA	writers	SRSF1	METTL3	0.189636	2.13e-10
BRCA	writers	SRSF1	RBM15	0.334641	2.71e-30
BRCA	readers	SRSF1	RBMX	0.528454	1.96e-80
BRCA	writers	SRSF1	WTAP	0.274236	1.69e-20
BRCA	readers	SRSF1	YTHDC1	0.409637	6.48e-46
BRCA	readers	SRSF1	YTHDC2	0.263512	5.41e-19
BRCA	readers	SRSF1	YTHDF1	0.24466	1.64e-16
BRCA	readers	SRSF1	YTHDF2	0.3057	2.59e-25
BRCA	readers	SRSF1	YTHDF3	0.352733	1.09e-33
BRCA	writers	SRSF1	ZC3H13	0.218123	2.34e-13
BRCA	erasers	SRSF10	ALKBH5	0.0819977	0.0064107
BRCA	readers	SRSF10	FMR1	0.57793	2.24e-99
BRCA	erasers	SRSF10	FTO	0.127345	2.2e-05
BRCA	readers	SRSF10	HNRNPA2B1	0.424019	2.11e-49
BRCA	readers	SRSF10	HNRNPC	0.300747	1.63e-24
BRCA	readers	SRSF10	IGF2BP2	0.105846	0.000426993
BRCA	readers	SRSF10	IGF2BP3	0.104357	0.000514717
BRCA	writers	SRSF10	KIAA1429	0.378595	6.02e-39
BRCA	readers	SRSF10	LRPPRC	0.487742	4.81e-67
BRCA	writers	SRSF10	METTL14	0.440039	1.72e-53
BRCA	writers	SRSF10	METTL16	0.252548	1.59e-17
BRCA	writers	SRSF10	METTL3	0.307066	1.55e-25
BRCA	writers	SRSF10	RBM15	0.485693	2.04e-66
BRCA	writers	SRSF10	RBM15B	0.0682783	0.0232849
BRCA	readers	SRSF10	RBMX	0.602908	3.12e-110
BRCA	writers	SRSF10	WTAP	0.329449	2.33e-29
BRCA	readers	SRSF10	YTHDC1	0.597557	7.95e-108
BRCA	readers	SRSF10	YTHDC2	0.455858	9.47e-58
BRCA	readers	SRSF10	YTHDF1	0.199056	2.5e-11
BRCA	readers	SRSF10	YTHDF2	0.494913	2.84e-69
BRCA	readers	SRSF10	YTHDF3	0.494342	4.29e-69
BRCA	writers	SRSF10	ZC3H13	0.429424	9.3e-51
BRCA	erasers	SRSF11	ALKBH5	0.0624338	0.0380672
BRCA	readers	SRSF11	FMR1	0.385979	1.54e-40
BRCA	erasers	SRSF11	FTO	0.150428	5.14e-07
BRCA	readers	SRSF11	HNRNPA2B1	0.303625	5.63e-25
BRCA	readers	SRSF11	HNRNPC	0.179818	1.78e-09
BRCA	readers	SRSF11	IGF2BP3	0.0627858	0.0369925
BRCA	writers	SRSF11	KIAA1429	0.115968	0.000112513
BRCA	readers	SRSF11	LRPPRC	0.17479	5.03e-09
BRCA	writers	SRSF11	METTL14	0.334928	2.4e-30
BRCA	writers	SRSF11	METTL16	0.237943	1.12e-15
BRCA	writers	SRSF11	METTL3	0.423072	3.62e-49
BRCA	writers	SRSF11	RBM15	0.408927	9.53e-46
BRCA	writers	SRSF11	RBM15B	0.112742	0.000174209
BRCA	readers	SRSF11	RBMX	0.509504	5.63e-74
BRCA	writers	SRSF11	WTAP	0.30052	1.77e-24
BRCA	readers	SRSF11	YTHDC1	0.54816	1.34e-87
BRCA	readers	SRSF11	YTHDC2	0.409475	7.07e-46
BRCA	readers	SRSF11	YTHDF1	0.0695461	0.0208354
BRCA	readers	SRSF11	YTHDF2	0.299191	2.88e-24
BRCA	readers	SRSF11	YTHDF3	0.175448	4.4e-09
BRCA	writers	SRSF11	ZC3H13	0.359097	6.12e-35
BRCA	readers	SRSF12	FMR1	0.233569	3.81e-15
BRCA	readers	SRSF12	HNRNPA2B1	0.0729632	0.015317
BRCA	readers	SRSF12	HNRNPC	-0.0610342	0.0426065
BRCA	readers	SRSF12	IGF2BP1	0.115149	0.000125863
BRCA	readers	SRSF12	IGF2BP2	0.558961	9.8e-92
BRCA	readers	SRSF12	IGF2BP3	0.406477	3.59e-45
BRCA	writers	SRSF12	KIAA1429	-0.0742748	0.0135678
BRCA	readers	SRSF12	LRPPRC	0.223387	5.96e-14
BRCA	writers	SRSF12	METTL14	-0.276072	9.22e-21
BRCA	writers	SRSF12	METTL3	-0.077073	0.0104138
BRCA	writers	SRSF12	RBM15	0.431358	3.01e-51
BRCA	readers	SRSF12	RBMX	0.193574	8.82e-11
BRCA	writers	SRSF12	WTAP	0.291543	4.53e-23
BRCA	readers	SRSF12	YTHDC1	-0.149669	5.87e-07
BRCA	readers	SRSF12	YTHDC2	-0.285193	4.18e-22
BRCA	readers	SRSF12	YTHDF2	0.187401	3.49e-10
BRCA	writers	SRSF12	ZC3H13	-0.113845	0.000150205
BRCA	readers	SRSF2	FMR1	0.317459	2.86e-27
BRCA	erasers	SRSF2	FTO	-0.209644	1.98e-12
BRCA	readers	SRSF2	HNRNPA2B1	0.536308	3.11e-83
BRCA	readers	SRSF2	HNRNPC	0.254124	9.89e-18
BRCA	readers	SRSF2	IGF2BP2	0.17049	1.2e-08
BRCA	readers	SRSF2	IGF2BP3	0.0842351	0.00510004
BRCA	readers	SRSF2	LRPPRC	0.183156	8.75e-10
BRCA	writers	SRSF2	METTL16	-0.0593395	0.0487069
BRCA	writers	SRSF2	METTL3	0.269281	8.56e-20
BRCA	writers	SRSF2	RBM15	0.267345	1.6e-19
BRCA	readers	SRSF2	RBMX	0.457625	3.07e-58
BRCA	writers	SRSF2	WTAP	0.286795	2.4e-22
BRCA	readers	SRSF2	YTHDC1	0.2244	4.56e-14
BRCA	readers	SRSF2	YTHDF1	0.299614	2.47e-24
BRCA	readers	SRSF2	YTHDF2	0.189322	2.29e-10
BRCA	writers	SRSF2	ZC3H13	-0.119753	6.64e-05
BRCA	readers	SRSF3	FMR1	0.21524	4.88e-13
BRCA	erasers	SRSF3	FTO	-0.183141	8.78e-10
BRCA	readers	SRSF3	HNRNPA2B1	0.449491	5.22e-56
BRCA	readers	SRSF3	HNRNPC	0.352286	1.32e-33
BRCA	readers	SRSF3	IGF2BP2	0.211297	1.31e-12
BRCA	readers	SRSF3	IGF2BP3	0.123903	3.66e-05
BRCA	readers	SRSF3	LRPPRC	0.236562	1.66e-15
BRCA	writers	SRSF3	METTL16	0.0640352	0.0333837
BRCA	writers	SRSF3	METTL3	0.133788	8.18e-06
BRCA	writers	SRSF3	RBM15	0.23267	4.89e-15
BRCA	writers	SRSF3	RBM15B	0.0792185	0.00845573
BRCA	readers	SRSF3	RBMX	0.531732	1.36e-81
BRCA	writers	SRSF3	WTAP	0.38943	2.7e-41
BRCA	readers	SRSF3	YTHDC1	0.203749	8.26e-12
BRCA	readers	SRSF3	YTHDC2	-0.0923357	0.00213286
BRCA	readers	SRSF3	YTHDF1	0.140678	2.7e-06
BRCA	readers	SRSF3	YTHDF2	0.267097	1.73e-19
BRCA	writers	SRSF3	ZC3H13	-0.094348	0.00169929
BRCA	erasers	SRSF4	ALKBH5	0.0812292	0.00692628
BRCA	readers	SRSF4	FMR1	0.11649	0.000104725
BRCA	erasers	SRSF4	FTO	-0.0815476	0.00670834
BRCA	readers	SRSF4	HNRNPA2B1	0.33718	9.32e-31
BRCA	readers	SRSF4	HNRNPC	0.153604	2.92e-07
BRCA	readers	SRSF4	IGF2BP2	0.233515	3.87e-15
BRCA	readers	SRSF4	IGF2BP3	0.170132	1.29e-08
BRCA	writers	SRSF4	KIAA1429	-0.152948	3.29e-07
BRCA	readers	SRSF4	LRPPRC	-0.127019	2.31e-05
BRCA	writers	SRSF4	METTL14	-0.147755	8.18e-07
BRCA	writers	SRSF4	METTL3	0.260904	1.23e-18
BRCA	writers	SRSF4	RBM15	0.180385	1.58e-09
BRCA	writers	SRSF4	RBM15B	0.223104	6.42e-14
BRCA	readers	SRSF4	RBMX	0.267824	1.37e-19
BRCA	writers	SRSF4	WTAP	0.161499	6.84e-08
BRCA	readers	SRSF4	YTHDC1	0.156408	1.76e-07
BRCA	readers	SRSF4	YTHDC2	-0.143509	1.69e-06
BRCA	readers	SRSF4	YTHDF2	0.367778	1.09e-36
BRCA	readers	SRSF4	YTHDF3	-0.251904	1.93e-17
BRCA	erasers	SRSF5	ALKBH5	0.0859964	0.00424414
BRCA	readers	SRSF5	FMR1	-0.107489	0.000346511
BRCA	erasers	SRSF5	FTO	0.0592156	0.0491804
BRCA	readers	SRSF5	HNRNPA2B1	0.067284	0.0253772
BRCA	readers	SRSF5	HNRNPC	0.113277	0.000162145
BRCA	readers	SRSF5	IGF2BP1	-0.121339	5.3e-05
BRCA	readers	SRSF5	IGF2BP2	-0.246567	9.42e-17
BRCA	readers	SRSF5	IGF2BP3	-0.203152	9.52e-12
BRCA	writers	SRSF5	KIAA1429	-0.0658393	0.0287056
BRCA	readers	SRSF5	LRPPRC	-0.262805	6.76e-19
BRCA	writers	SRSF5	METTL14	0.215381	4.71e-13
BRCA	writers	SRSF5	METTL16	0.208412	2.67e-12
BRCA	writers	SRSF5	METTL3	0.461522	2.49e-59
BRCA	writers	SRSF5	RBM15	-0.10989	0.000253986
BRCA	writers	SRSF5	RBM15B	0.179058	2.08e-09
BRCA	readers	SRSF5	RBMX	0.203672	8.41e-12
BRCA	readers	SRSF5	YTHDC1	0.355805	2.73e-34
BRCA	readers	SRSF5	YTHDC2	0.227421	2.04e-14
BRCA	readers	SRSF5	YTHDF1	-0.0645538	0.0319766
BRCA	readers	SRSF5	YTHDF2	-0.0783396	0.00921413
BRCA	readers	SRSF5	YTHDF3	-0.183084	8.89e-10
BRCA	writers	SRSF5	ZC3H13	0.182116	1.09e-09
BRCA	erasers	SRSF6	ALKBH5	0.0663501	0.0274882
BRCA	readers	SRSF6	FMR1	0.217467	2.77e-13
BRCA	erasers	SRSF6	FTO	0.12595	2.71e-05
BRCA	readers	SRSF6	HNRNPA2B1	0.242712	2.89e-16
BRCA	readers	SRSF6	HNRNPC	0.229058	1.31e-14
BRCA	readers	SRSF6	IGF2BP1	-0.086891	0.00386128
BRCA	readers	SRSF6	IGF2BP2	-0.310706	3.9e-26
BRCA	readers	SRSF6	IGF2BP3	-0.220836	1.16e-13
BRCA	writers	SRSF6	KIAA1429	0.195225	6.06e-11
BRCA	readers	SRSF6	LRPPRC	0.0668524	0.0263348
BRCA	writers	SRSF6	METTL14	0.424736	1.4e-49
BRCA	writers	SRSF6	METTL16	0.228023	1.73e-14
BRCA	writers	SRSF6	METTL3	0.450026	3.74e-56
BRCA	writers	SRSF6	RBM15	0.0636936	0.0343393
BRCA	writers	SRSF6	RBM15B	0.0997562	0.000903158
BRCA	readers	SRSF6	RBMX	0.450792	2.32e-56
BRCA	writers	SRSF6	WTAP	0.126461	2.51e-05
BRCA	readers	SRSF6	YTHDC1	0.521234	6.32e-78
BRCA	readers	SRSF6	YTHDC2	0.43694	1.1e-52
BRCA	readers	SRSF6	YTHDF1	0.323794	2.31e-28
BRCA	readers	SRSF6	YTHDF2	0.0780451	0.00948155
BRCA	readers	SRSF6	YTHDF3	0.171469	9.84e-09
BRCA	writers	SRSF6	ZC3H13	0.301587	1.2e-24
BRCA	readers	SRSF7	FMR1	0.24135	4.27e-16
BRCA	erasers	SRSF7	FTO	-0.207991	2.96e-12
BRCA	readers	SRSF7	HNRNPA2B1	0.490102	9.01e-68
BRCA	readers	SRSF7	HNRNPC	0.343292	6.86e-32
BRCA	readers	SRSF7	IGF2BP2	0.170532	1.19e-08
BRCA	readers	SRSF7	IGF2BP3	0.0737199	0.0142851
BRCA	readers	SRSF7	LRPPRC	0.273402	2.23e-20
BRCA	writers	SRSF7	METTL3	0.293558	2.21e-23
BRCA	writers	SRSF7	RBM15	0.264415	4.07e-19
BRCA	writers	SRSF7	RBM15B	0.130361	1.39e-05
BRCA	readers	SRSF7	RBMX	0.53068	3.2e-81
BRCA	writers	SRSF7	WTAP	0.333327	4.69e-30
BRCA	readers	SRSF7	YTHDC1	0.260823	1.26e-18
BRCA	readers	SRSF7	YTHDF1	0.190256	1.86e-10
BRCA	readers	SRSF7	YTHDF2	0.224719	4.19e-14
BRCA	writers	SRSF7	ZC3H13	-0.0735571	0.0145018
BRCA	readers	SRSF8	FMR1	-0.104456	0.000508398
BRCA	erasers	SRSF8	FTO	0.142223	2.09e-06
BRCA	readers	SRSF8	HNRNPA2B1	-0.0756135	0.0119668
BRCA	readers	SRSF8	IGF2BP2	0.0663758	0.0274283
BRCA	writers	SRSF8	KIAA1429	-0.0904625	0.00262525
BRCA	readers	SRSF8	LRPPRC	0.0604692	0.0445643
BRCA	writers	SRSF8	METTL16	0.112261	0.000185748
BRCA	writers	SRSF8	RBM15B	0.0948023	0.00161334
BRCA	writers	SRSF8	WTAP	0.188004	3.06e-10
BRCA	readers	SRSF8	YTHDC1	0.074454	0.0133431
BRCA	readers	SRSF8	YTHDC2	-0.0815633	0.0066977
BRCA	readers	SRSF8	YTHDF1	-0.13522	6.53e-06
BRCA	readers	SRSF8	YTHDF2	0.155038	2.26e-07
BRCA	writers	SRSF8	ZC3H13	0.0861481	0.0041769
BRCA	erasers	SRSF9	ALKBH5	0.17087	1.11e-08
BRCA	erasers	SRSF9	FTO	-0.0808431	0.00719912
BRCA	readers	SRSF9	HNRNPA2B1	0.357982	1.02e-34
BRCA	readers	SRSF9	HNRNPC	0.273259	2.34e-20
BRCA	readers	SRSF9	IGF2BP2	-0.0946023	0.00165068
BRCA	readers	SRSF9	IGF2BP3	-0.078159	0.0093773
BRCA	readers	SRSF9	LRPPRC	0.0726315	0.0157896
BRCA	writers	SRSF9	METTL3	0.109309	0.000273972
BRCA	writers	SRSF9	RBM15	-0.159741	9.51e-08
BRCA	writers	SRSF9	RBM15B	0.179359	1.96e-09
BRCA	readers	SRSF9	RBMX	0.0789109	0.00871457
BRCA	writers	SRSF9	WTAP	-0.0817516	0.00657194
BRCA	readers	SRSF9	YTHDC2	-0.0858307	0.00431874
BRCA	readers	SRSF9	YTHDF1	0.218759	1.99e-13
BRCA	readers	SRSF9	YTHDF3	-0.118628	7.78e-05
BRCA	writers	SRSF9	ZC3H13	-0.120001	6.41e-05
CESC	erasers	SRSF1	ALKBH5	0.280934	5.88e-07
CESC	readers	SRSF1	FMR1	0.321649	8.55e-09
CESC	erasers	SRSF1	FTO	0.268013	1.97e-06
CESC	readers	SRSF1	HNRNPA2B1	0.590411	3.92e-30
CESC	readers	SRSF1	HNRNPC	0.56274	5.89e-27
CESC	readers	SRSF1	IGF2BP3	0.157103	0.00588604
CESC	writers	SRSF1	KIAA1429	0.353591	1.93e-10
CESC	readers	SRSF1	LRPPRC	0.349939	3.04e-10
CESC	writers	SRSF1	METTL14	0.445859	2.37e-16
CESC	writers	SRSF1	METTL16	0.153923	0.00698338
CESC	writers	SRSF1	METTL3	0.521406	9.9e-23
CESC	writers	SRSF1	RBM15	0.321739	8.46e-09
CESC	writers	SRSF1	RBM15B	0.326231	5.1e-09
CESC	readers	SRSF1	RBMX	0.625983	1.07e-34
CESC	writers	SRSF1	WTAP	0.274776	1.05e-06
CESC	readers	SRSF1	YTHDC1	0.439186	7.34e-16
CESC	readers	SRSF1	YTHDC2	0.403571	2.05e-13
CESC	readers	SRSF1	YTHDF1	0.23259	3.98e-05
CESC	readers	SRSF1	YTHDF2	0.34345	6.74e-10
CESC	readers	SRSF1	YTHDF3	0.344696	5.79e-10
CESC	writers	SRSF1	ZC3H13	0.443595	3.49e-16
CESC	erasers	SRSF10	ALKBH5	0.251146	8.72e-06
CESC	readers	SRSF10	FMR1	0.456643	3.61e-17
CESC	erasers	SRSF10	FTO	0.416592	2.82e-14
CESC	readers	SRSF10	HNRNPA2B1	0.55529	3.76e-26
CESC	readers	SRSF10	HNRNPC	0.389501	1.59e-12
CESC	readers	SRSF10	IGF2BP3	0.185116	0.00114148
CESC	writers	SRSF10	KIAA1429	0.323747	6.75e-09
CESC	readers	SRSF10	LRPPRC	0.222762	8.48e-05
CESC	writers	SRSF10	METTL14	0.540051	1.45e-24
CESC	writers	SRSF10	METTL3	0.573967	3.29e-28
CESC	writers	SRSF10	RBM15	0.39212	1.09e-12
CESC	writers	SRSF10	RBM15B	0.228095	5.65e-05
CESC	readers	SRSF10	RBMX	0.575426	2.24e-28
CESC	writers	SRSF10	WTAP	0.31671	1.48e-08
CESC	readers	SRSF10	YTHDC1	0.523457	6.3e-23
CESC	readers	SRSF10	YTHDC2	0.607596	2.89e-32
CESC	readers	SRSF10	YTHDF1	0.175371	0.00207644
CESC	readers	SRSF10	YTHDF2	0.43884	7.78e-16
CESC	readers	SRSF10	YTHDF3	0.410607	7.1e-14
CESC	writers	SRSF10	ZC3H13	0.519685	1.44e-22
CESC	erasers	SRSF11	ALKBH5	0.221688	9.2e-05
CESC	readers	SRSF11	FMR1	0.448526	1.5e-16
CESC	erasers	SRSF11	FTO	0.371595	1.87e-11
CESC	readers	SRSF11	HNRNPA2B1	0.481766	3.46e-19
CESC	readers	SRSF11	HNRNPC	0.30574	4.83e-08
CESC	readers	SRSF11	IGF2BP3	0.189849	0.000844389
CESC	writers	SRSF11	KIAA1429	0.34065	9.45e-10
CESC	readers	SRSF11	LRPPRC	0.165618	0.00366825
CESC	writers	SRSF11	METTL14	0.459291	2.25e-17
CESC	writers	SRSF11	METTL3	0.545802	3.74e-25
CESC	writers	SRSF11	RBM15	0.242256	1.83e-05
CESC	writers	SRSF11	RBM15B	0.24376	1.62e-05
CESC	readers	SRSF11	RBMX	0.433136	2e-15
CESC	writers	SRSF11	WTAP	0.303807	5.91e-08
CESC	readers	SRSF11	YTHDC1	0.540235	1.39e-24
CESC	readers	SRSF11	YTHDC2	0.610211	1.33e-32
CESC	readers	SRSF11	YTHDF1	0.224233	7.59e-05
CESC	readers	SRSF11	YTHDF2	0.408119	1.04e-13
CESC	readers	SRSF11	YTHDF3	0.47961	5.24e-19
CESC	writers	SRSF11	ZC3H13	0.527162	2.76e-23
CESC	erasers	SRSF12	ALKBH5	0.224755	7.3e-05
CESC	readers	SRSF12	HNRNPC	0.246826	1.26e-05
CESC	readers	SRSF12	IGF2BP1	0.26596	2.37e-06
CESC	readers	SRSF12	IGF2BP3	0.19431	0.000631388
CESC	writers	SRSF12	KIAA1429	0.133779	0.0192254
CESC	writers	SRSF12	METTL16	0.229577	5.04e-05
CESC	writers	SRSF12	METTL3	0.187152	0.00100351
CESC	readers	SRSF12	RBMX	0.331327	2.84e-09
CESC	writers	SRSF12	WTAP	0.158818	0.00536096
CESC	erasers	SRSF2	ALKBH5	0.215528	0.000144972
CESC	readers	SRSF2	FMR1	0.311562	2.59e-08
CESC	erasers	SRSF2	FTO	0.172811	0.00241777
CESC	readers	SRSF2	HNRNPA2B1	0.549636	1.49e-25
CESC	readers	SRSF2	HNRNPC	0.477585	7.7e-19
CESC	writers	SRSF2	KIAA1429	0.146686	0.0101885
CESC	readers	SRSF2	LRPPRC	0.187237	0.000998083
CESC	writers	SRSF2	METTL14	0.369661	2.42e-11
CESC	writers	SRSF2	METTL3	0.456411	3.77e-17
CESC	writers	SRSF2	RBM15	0.30398	5.81e-08
CESC	writers	SRSF2	RBM15B	0.13799	0.0157122
CESC	readers	SRSF2	RBMX	0.571699	5.94e-28
CESC	writers	SRSF2	WTAP	0.438962	7.63e-16
CESC	readers	SRSF2	YTHDC1	0.42484	7.69e-15
CESC	readers	SRSF2	YTHDC2	0.34314	7e-10
CESC	readers	SRSF2	YTHDF1	0.188514	0.000919975
CESC	readers	SRSF2	YTHDF2	0.305364	5.02e-08
CESC	readers	SRSF2	YTHDF3	0.123801	0.0303799
CESC	writers	SRSF2	ZC3H13	0.219164	0.000110991
CESC	erasers	SRSF3	ALKBH5	0.222319	8.77e-05
CESC	readers	SRSF3	FMR1	0.205163	0.000303018
CESC	readers	SRSF3	HNRNPA2B1	0.392097	1.1e-12
CESC	readers	SRSF3	HNRNPC	0.509174	1.38e-21
CESC	readers	SRSF3	LRPPRC	0.172408	0.00247601
CESC	writers	SRSF3	METTL14	0.252278	7.91e-06
CESC	writers	SRSF3	METTL16	0.174995	0.00212364
CESC	writers	SRSF3	METTL3	0.19194	0.000737436
CESC	writers	SRSF3	RBM15	0.254569	6.5e-06
CESC	writers	SRSF3	RBM15B	0.199744	0.000439279
CESC	readers	SRSF3	RBMX	0.586913	1.03e-29
CESC	writers	SRSF3	WTAP	0.398349	4.43e-13
CESC	readers	SRSF3	YTHDC1	0.217089	0.000129343
CESC	readers	SRSF3	YTHDF1	0.12799	0.0251585
CESC	readers	SRSF3	YTHDF2	0.268435	1.9e-06
CESC	erasers	SRSF4	ALKBH5	0.203417	0.000341887
CESC	readers	SRSF4	FMR1	0.433424	1.91e-15
CESC	erasers	SRSF4	FTO	0.376855	9.21e-12
CESC	readers	SRSF4	HNRNPA2B1	0.537275	2.77e-24
CESC	readers	SRSF4	HNRNPC	0.426392	6e-15
CESC	readers	SRSF4	IGF2BP1	-0.232156	4.12e-05
CESC	writers	SRSF4	KIAA1429	0.195059	0.000600925
CESC	writers	SRSF4	METTL14	0.379855	6.11e-12
CESC	writers	SRSF4	METTL3	0.413206	4.77e-14
CESC	writers	SRSF4	RBM15	0.164791	0.00384433
CESC	writers	SRSF4	RBM15B	0.205437	0.000297317
CESC	readers	SRSF4	RBMX	0.341987	8.04e-10
CESC	writers	SRSF4	WTAP	0.374205	1.32e-11
CESC	readers	SRSF4	YTHDC1	0.526407	3.27e-23
CESC	readers	SRSF4	YTHDC2	0.437831	9.21e-16
CESC	readers	SRSF4	YTHDF2	0.532094	9.08e-24
CESC	readers	SRSF4	YTHDF3	0.127019	0.026294
CESC	writers	SRSF4	ZC3H13	0.382635	4.16e-12
CESC	erasers	SRSF5	ALKBH5	0.166296	0.00352935
CESC	readers	SRSF5	FMR1	0.297648	1.12e-07
CESC	erasers	SRSF5	FTO	0.308143	3.74e-08
CESC	readers	SRSF5	HNRNPA2B1	0.40059	3.19e-13
CESC	readers	SRSF5	HNRNPC	0.345278	5.4e-10
CESC	writers	SRSF5	KIAA1429	0.249318	1.02e-05
CESC	writers	SRSF5	METTL14	0.378664	7.2e-12
CESC	writers	SRSF5	METTL3	0.542325	8.51e-25
CESC	writers	SRSF5	RBM15	0.140222	0.0140889
CESC	writers	SRSF5	RBM15B	0.184033	0.00122173
CESC	readers	SRSF5	RBMX	0.414421	3.95e-14
CESC	writers	SRSF5	WTAP	0.263855	2.87e-06
CESC	readers	SRSF5	YTHDC1	0.522294	8.14e-23
CESC	readers	SRSF5	YTHDC2	0.407356	1.16e-13
CESC	readers	SRSF5	YTHDF1	0.165112	0.00377516
CESC	readers	SRSF5	YTHDF2	0.182483	0.00134573
CESC	readers	SRSF5	YTHDF3	0.250272	9.39e-06
CESC	writers	SRSF5	ZC3H13	0.328975	3.72e-09
CESC	erasers	SRSF6	ALKBH5	0.233568	3.69e-05
CESC	readers	SRSF6	FMR1	0.200279	0.000423643
CESC	erasers	SRSF6	FTO	0.291248	2.14e-07
CESC	readers	SRSF6	HNRNPA2B1	0.305012	5.21e-08
CESC	readers	SRSF6	HNRNPC	0.226962	6.17e-05
CESC	readers	SRSF6	IGF2BP1	0.221607	9.25e-05
CESC	writers	SRSF6	KIAA1429	0.335377	1.77e-09
CESC	readers	SRSF6	LRPPRC	0.204002	0.00032837
CESC	writers	SRSF6	METTL14	0.398964	4.05e-13
CESC	writers	SRSF6	METTL16	0.146674	0.0101947
CESC	writers	SRSF6	METTL3	0.538291	2.19e-24
CESC	writers	SRSF6	RBM15	0.208247	0.000244244
CESC	writers	SRSF6	RBM15B	0.326861	4.74e-09
CESC	readers	SRSF6	RBMX	0.534663	5.05e-24
CESC	writers	SRSF6	WTAP	0.245453	1.41e-05
CESC	readers	SRSF6	YTHDC1	0.282553	5.03e-07
CESC	readers	SRSF6	YTHDC2	0.309489	3.24e-08
CESC	readers	SRSF6	YTHDF1	0.576055	1.9e-28
CESC	readers	SRSF6	YTHDF2	0.181214	0.00145574
CESC	readers	SRSF6	YTHDF3	0.359355	9.29e-11
CESC	writers	SRSF6	ZC3H13	0.347468	4.13e-10
CESC	erasers	SRSF7	ALKBH5	0.288848	2.72e-07
CESC	readers	SRSF7	FMR1	0.267755	2.02e-06
CESC	erasers	SRSF7	FTO	0.123224	0.031167
CESC	readers	SRSF7	HNRNPA2B1	0.449196	1.33e-16
CESC	readers	SRSF7	HNRNPC	0.519488	1.51e-22
CESC	writers	SRSF7	KIAA1429	0.163957	0.00402969
CESC	readers	SRSF7	LRPPRC	0.348861	3.48e-10
CESC	writers	SRSF7	METTL14	0.382804	4.07e-12
CESC	writers	SRSF7	METTL16	0.155813	0.00631126
CESC	writers	SRSF7	METTL3	0.462589	1.24e-17
CESC	writers	SRSF7	RBM15	0.370221	2.25e-11
CESC	writers	SRSF7	RBM15B	0.295023	1.46e-07
CESC	readers	SRSF7	RBMX	0.647798	8.48e-38
CESC	writers	SRSF7	WTAP	0.321094	9.1e-09
CESC	readers	SRSF7	YTHDC1	0.324064	6.52e-09
CESC	readers	SRSF7	YTHDC2	0.240385	2.13e-05
CESC	readers	SRSF7	YTHDF1	0.232096	4.14e-05
CESC	readers	SRSF7	YTHDF2	0.29239	1.91e-07
CESC	writers	SRSF7	ZC3H13	0.232833	3.91e-05
CESC	erasers	SRSF8	FTO	0.117074	0.0406955
CESC	writers	SRSF8	KIAA1429	0.21591	0.00014099
CESC	readers	SRSF8	LRPPRC	0.256561	5.47e-06
CESC	writers	SRSF8	METTL14	0.19786	0.000498695
CESC	writers	SRSF8	METTL16	0.133607	0.019382
CESC	writers	SRSF8	METTL3	0.310955	2.77e-08
CESC	writers	SRSF8	RBM15B	0.287438	3.12e-07
CESC	readers	SRSF8	RBMX	0.187481	0.000982748
CESC	readers	SRSF8	YTHDC1	0.182726	0.00132559
CESC	readers	SRSF8	YTHDF3	0.254602	6.48e-06
CESC	writers	SRSF8	ZC3H13	0.372084	1.75e-11
CESC	erasers	SRSF9	ALKBH5	0.323926	6.62e-09
CESC	readers	SRSF9	FMR1	0.206413	0.000277762
CESC	erasers	SRSF9	FTO	0.296375	1.28e-07
CESC	readers	SRSF9	HNRNPA2B1	0.319688	1.06e-08
CESC	readers	SRSF9	HNRNPC	0.578402	1.02e-28
CESC	readers	SRSF9	IGF2BP2	0.187167	0.00100255
CESC	readers	SRSF9	IGF2BP3	0.236021	3.03e-05
CESC	writers	SRSF9	KIAA1429	0.384097	3.4e-12
CESC	readers	SRSF9	LRPPRC	0.42282	1.06e-14
CESC	writers	SRSF9	METTL14	0.368904	2.68e-11
CESC	writers	SRSF9	METTL16	0.150288	0.00845877
CESC	writers	SRSF9	METTL3	0.429786	3.47e-15
CESC	writers	SRSF9	RBM15B	0.360165	8.37e-11
CESC	readers	SRSF9	RBMX	0.458536	2.58e-17
CESC	writers	SRSF9	WTAP	0.37405	1.35e-11
CESC	readers	SRSF9	YTHDC1	0.346138	4.86e-10
CESC	readers	SRSF9	YTHDC2	0.139571	0.0145465
CESC	readers	SRSF9	YTHDF1	0.221735	9.16e-05
CESC	readers	SRSF9	YTHDF2	0.210286	0.000211427
CESC	readers	SRSF9	YTHDF3	0.27796	7.81e-07
CESC	writers	SRSF9	ZC3H13	0.276447	9.01e-07
CHOL	erasers	SRSF1	ALKBH5	0.448292	0.00610621
CHOL	readers	SRSF1	HNRNPA2B1	0.641471	2.49e-05
CHOL	readers	SRSF1	HNRNPC	0.534649	0.000781714
CHOL	writers	SRSF1	METTL16	0.485731	0.00267199
CHOL	writers	SRSF1	METTL3	0.552107	0.000481235
CHOL	writers	SRSF1	RBM15	0.424868	0.00979701
CHOL	readers	SRSF1	RBMX	0.39016	0.018651
CHOL	readers	SRSF1	YTHDC1	0.427058	0.00938602
CHOL	readers	SRSF1	YTHDF1	0.352613	0.0349195
CHOL	erasers	SRSF10	ALKBH5	0.535947	0.000754708
CHOL	readers	SRSF10	FMR1	0.432216	0.00847595
CHOL	readers	SRSF10	HNRNPA2B1	0.459248	0.00483944
CHOL	readers	SRSF10	IGF2BP1	0.334871	0.045893
CHOL	writers	SRSF10	METTL14	0.538086	0.000711988
CHOL	writers	SRSF10	METTL3	0.607824	8.43e-05
CHOL	writers	SRSF10	RBM15	0.43477	0.00805381
CHOL	writers	SRSF10	WTAP	0.391861	0.0180988
CHOL	readers	SRSF10	YTHDC1	0.380888	0.0219158
CHOL	readers	SRSF10	YTHDF2	0.416157	0.0115863
CHOL	readers	SRSF10	YTHDF3	0.396189	0.0167546
CHOL	writers	SRSF10	ZC3H13	0.375468	0.0240343
CHOL	readers	SRSF11	FMR1	0.332656	0.0474393
CHOL	readers	SRSF11	HNRNPA2B1	0.516383	0.0012638
CHOL	writers	SRSF11	METTL3	0.367548	0.0274336
CHOL	writers	SRSF11	RBM15	0.502167	0.00180389
CHOL	readers	SRSF11	YTHDC1	0.422341	0.01029
CHOL	readers	SRSF11	YTHDC2	0.360046	0.0310087
CHOL	readers	SRSF11	YTHDF1	0.388213	0.0193005
CHOL	readers	SRSF12	IGF2BP1	0.349257	0.036812
CHOL	erasers	SRSF2	ALKBH5	0.444796	0.00656616
CHOL	readers	SRSF2	HNRNPA2B1	0.616342	6.27e-05
CHOL	readers	SRSF2	HNRNPC	0.496813	0.00205455
CHOL	readers	SRSF2	IGF2BP1	0.33383	0.0466146
CHOL	writers	SRSF2	METTL3	0.601621	0.000103994
CHOL	writers	SRSF2	RBM15	0.383346	0.0210071
CHOL	readers	SRSF2	RBMX	0.374404	0.0244697
CHOL	writers	SRSF2	WTAP	0.418339	0.0111138
CHOL	readers	SRSF2	YTHDF1	0.425616	0.00965493
CHOL	erasers	SRSF3	ALKBH5	0.395928	0.0168331
CHOL	readers	SRSF3	HNRNPA2B1	0.340484	0.0421568
CHOL	readers	SRSF3	HNRNPC	0.452196	0.00562548
CHOL	writers	SRSF3	METTL16	0.529746	0.000891671
CHOL	writers	SRSF3	RBM15B	0.525519	0.000997214
CHOL	readers	SRSF3	RBMX	0.499326	0.00193336
CHOL	readers	SRSF3	YTHDC1	0.538125	0.000711216
CHOL	erasers	SRSF4	ALKBH5	0.563402	0.000346542
CHOL	readers	SRSF4	LRPPRC	-0.344646	0.0395476
CHOL	writers	SRSF4	WTAP	0.400341	0.0155447
CHOL	readers	SRSF4	YTHDF2	0.488655	0.0024951
CHOL	readers	SRSF5	FMR1	0.343827	0.0400505
CHOL	writers	SRSF5	METTL14	0.48731	0.00257516
CHOL	writers	SRSF5	METTL3	0.69269	2.85e-06
CHOL	writers	SRSF5	RBM15	0.520153	0.00114701
CHOL	writers	SRSF5	WTAP	0.419846	0.0107972
CHOL	readers	SRSF5	YTHDF2	0.342486	0.0408851
CHOL	readers	SRSF6	IGF2BP1	0.422719	0.0102149
CHOL	writers	SRSF6	METTL16	0.493925	0.00220199
CHOL	writers	SRSF6	METTL3	0.505154	0.00167607
CHOL	writers	SRSF6	RBM15	0.504456	0.00170521
CHOL	readers	SRSF6	YTHDC1	0.601067	0.000105941
CHOL	readers	SRSF6	YTHDF1	0.481176	0.00296929
CHOL	erasers	SRSF7	ALKBH5	0.468017	0.00399586
CHOL	readers	SRSF7	HNRNPA2B1	0.396683	0.0166068
CHOL	readers	SRSF7	HNRNPC	0.36611	0.028091
CHOL	writers	SRSF7	METTL3	0.510192	0.00147843
CHOL	writers	SRSF7	RBM15	0.541209	0.000653461
CHOL	writers	SRSF7	WTAP	0.357144	0.0324907
CHOL	readers	SRSF7	YTHDC1	0.361761	0.0301593
CHOL	readers	SRSF7	YTHDF1	0.338113	0.0437037
CHOL	readers	SRSF7	YTHDF2	0.336016	0.04511
CHOL	writers	SRSF8	METTL14	0.411126	0.0127403
CHOL	writers	SRSF8	RBM15	0.345242	0.0391853
CHOL	writers	SRSF9	ZC3H13	-0.356211	0.032979
COAD	readers	SRSF1	FMR1	0.610915	1.59e-49
COAD	erasers	SRSF1	FTO	0.304253	1.52e-11
COAD	readers	SRSF1	HNRNPA2B1	0.756561	1.47e-88
COAD	readers	SRSF1	HNRNPC	0.637497	4.41e-55
COAD	readers	SRSF1	IGF2BP2	0.316543	2.02e-12
COAD	readers	SRSF1	IGF2BP3	0.196803	1.69e-05
COAD	writers	SRSF1	KIAA1429	0.55029	1.22e-38
COAD	readers	SRSF1	LRPPRC	0.615248	2.15e-50
COAD	writers	SRSF1	METTL14	0.64978	7.7e-58
COAD	writers	SRSF1	METTL16	0.276987	9.63e-10
COAD	writers	SRSF1	METTL3	0.27125	2.18e-09
COAD	writers	SRSF1	RBM15	0.570927	4.31e-42
COAD	readers	SRSF1	RBMX	0.610316	2.1e-49
COAD	writers	SRSF1	WTAP	0.53201	8.96e-36
COAD	readers	SRSF1	YTHDC1	0.634127	2.39e-54
COAD	readers	SRSF1	YTHDC2	0.629749	2.09e-53
COAD	readers	SRSF1	YTHDF1	0.224711	8.35e-07
COAD	readers	SRSF1	YTHDF2	0.534829	3.33e-36
COAD	readers	SRSF1	YTHDF3	0.57638	4.8e-43
COAD	writers	SRSF1	ZC3H13	0.480091	1.58e-28
COAD	erasers	SRSF10	ALKBH5	-0.134567	0.00343358
COAD	readers	SRSF10	FMR1	0.683214	4.9e-66
COAD	erasers	SRSF10	FTO	0.356399	1.49e-15
COAD	readers	SRSF10	HNRNPA2B1	0.576177	5.21e-43
COAD	readers	SRSF10	HNRNPC	0.496228	1.2e-30
COAD	readers	SRSF10	IGF2BP1	0.0960489	0.0371797
COAD	readers	SRSF10	IGF2BP2	0.295829	5.74e-11
COAD	readers	SRSF10	IGF2BP3	0.264996	5.2e-09
COAD	writers	SRSF10	KIAA1429	0.583588	2.47e-44
COAD	readers	SRSF10	LRPPRC	0.567274	1.84e-41
COAD	writers	SRSF10	METTL14	0.679327	5e-65
COAD	writers	SRSF10	METTL16	0.288803	1.68e-10
COAD	writers	SRSF10	METTL3	0.312795	3.77e-12
COAD	writers	SRSF10	RBM15	0.683103	5.23e-66
COAD	writers	SRSF10	RBM15B	-0.211726	3.56e-06
COAD	readers	SRSF10	RBMX	0.607271	8.39e-49
COAD	writers	SRSF10	WTAP	0.624086	3.28e-52
COAD	readers	SRSF10	YTHDC1	0.616748	1.07e-50
COAD	readers	SRSF10	YTHDC2	0.672126	3.37e-63
COAD	readers	SRSF10	YTHDF1	0.169027	0.000228595
COAD	readers	SRSF10	YTHDF2	0.583402	2.67e-44
COAD	readers	SRSF10	YTHDF3	0.669344	1.66e-62
COAD	writers	SRSF10	ZC3H13	0.492239	4.11e-30
COAD	readers	SRSF11	FMR1	0.60053	1.71e-47
COAD	erasers	SRSF11	FTO	0.352992	2.88e-15
COAD	readers	SRSF11	HNRNPA2B1	0.537793	1.16e-36
COAD	readers	SRSF11	HNRNPC	0.487291	1.85e-29
COAD	readers	SRSF11	IGF2BP2	0.310053	5.93e-12
COAD	readers	SRSF11	IGF2BP3	0.140901	0.00217613
COAD	writers	SRSF11	KIAA1429	0.524283	1.29e-34
COAD	readers	SRSF11	LRPPRC	0.516874	1.57e-33
COAD	writers	SRSF11	METTL14	0.725342	4.45e-78
COAD	writers	SRSF11	METTL16	0.315626	2.35e-12
COAD	writers	SRSF11	METTL3	0.314508	2.84e-12
COAD	writers	SRSF11	RBM15	0.636186	8.53e-55
COAD	writers	SRSF11	RBM15B	-0.158646	0.000548683
COAD	readers	SRSF11	RBMX	0.480535	1.39e-28
COAD	writers	SRSF11	WTAP	0.571681	3.19e-42
COAD	readers	SRSF11	YTHDC1	0.695391	2.66e-69
COAD	readers	SRSF11	YTHDC2	0.722051	4.67e-77
COAD	readers	SRSF11	YTHDF1	0.103196	0.025114
COAD	readers	SRSF11	YTHDF2	0.544374	1.08e-37
COAD	readers	SRSF11	YTHDF3	0.62427	3e-52
COAD	writers	SRSF11	ZC3H13	0.509428	1.81e-32
COAD	erasers	SRSF12	ALKBH5	-0.110676	0.0162631
COAD	readers	SRSF12	FMR1	0.402857	8.34e-20
COAD	erasers	SRSF12	FTO	0.418836	1.98e-21
COAD	readers	SRSF12	HNRNPA2B1	0.0987589	0.032124
COAD	readers	SRSF12	IGF2BP3	0.202179	9.78e-06
COAD	writers	SRSF12	KIAA1429	0.243284	8.97e-08
COAD	writers	SRSF12	METTL14	0.391702	1.01e-18
COAD	writers	SRSF12	METTL16	0.184008	5.89e-05
COAD	writers	SRSF12	METTL3	0.139987	0.00232676
COAD	writers	SRSF12	RBM15	0.483381	5.97e-29
COAD	writers	SRSF12	RBM15B	-0.330766	1.74e-13
COAD	readers	SRSF12	RBMX	0.143203	0.00183514
COAD	writers	SRSF12	WTAP	0.34901	6.15e-15
COAD	readers	SRSF12	YTHDC1	0.242085	1.04e-07
COAD	readers	SRSF12	YTHDC2	0.36313	3.97e-16
COAD	readers	SRSF12	YTHDF3	0.372168	6.4e-17
COAD	writers	SRSF12	ZC3H13	0.286161	2.5e-10
COAD	readers	SRSF2	FMR1	0.473	1.25e-27
COAD	erasers	SRSF2	FTO	0.0960263	0.0372245
COAD	readers	SRSF2	HNRNPA2B1	0.645921	5.84e-57
COAD	readers	SRSF2	HNRNPC	0.576408	4.74e-43
COAD	readers	SRSF2	IGF2BP2	0.233753	2.89e-07
COAD	readers	SRSF2	IGF2BP3	0.101222	0.0280505
COAD	writers	SRSF2	KIAA1429	0.448179	1.19e-24
COAD	readers	SRSF2	LRPPRC	0.621147	1.34e-51
COAD	writers	SRSF2	METTL14	0.491642	4.93e-30
COAD	writers	SRSF2	METTL16	0.149584	0.00112965
COAD	writers	SRSF2	METTL3	0.322615	7.19e-13
COAD	writers	SRSF2	RBM15	0.304095	1.56e-11
COAD	readers	SRSF2	RBMX	0.60792	6.25e-49
COAD	writers	SRSF2	WTAP	0.542682	2e-37
COAD	readers	SRSF2	YTHDC1	0.414593	5.45e-21
COAD	readers	SRSF2	YTHDC2	0.47651	4.52e-28
COAD	readers	SRSF2	YTHDF1	0.255564	1.85e-08
COAD	readers	SRSF2	YTHDF2	0.470775	2.36e-27
COAD	readers	SRSF2	YTHDF3	0.475951	5.32e-28
COAD	writers	SRSF2	ZC3H13	0.230483	4.26e-07
COAD	readers	SRSF3	FMR1	0.423749	6e-22
COAD	readers	SRSF3	HNRNPA2B1	0.600002	2.16e-47
COAD	readers	SRSF3	HNRNPC	0.720902	1.05e-76
COAD	readers	SRSF3	IGF2BP2	0.189032	3.65e-05
COAD	readers	SRSF3	IGF2BP3	0.0992439	0.0312841
COAD	writers	SRSF3	KIAA1429	0.462943	2.15e-26
COAD	readers	SRSF3	LRPPRC	0.629072	2.91e-53
COAD	writers	SRSF3	METTL14	0.50216	1.86e-31
COAD	writers	SRSF3	METTL16	0.142685	0.00190732
COAD	writers	SRSF3	METTL3	0.220458	1.36e-06
COAD	writers	SRSF3	RBM15	0.243425	8.82e-08
COAD	writers	SRSF3	RBM15B	-0.114055	0.013257
COAD	readers	SRSF3	RBMX	0.72062	1.28e-76
COAD	writers	SRSF3	WTAP	0.665355	1.59e-61
COAD	readers	SRSF3	YTHDC1	0.381128	9.89e-18
COAD	readers	SRSF3	YTHDC2	0.412547	8.83e-21
COAD	readers	SRSF3	YTHDF1	0.193616	2.33e-05
COAD	readers	SRSF3	YTHDF2	0.543575	1.45e-37
COAD	readers	SRSF3	YTHDF3	0.51582	2.22e-33
COAD	writers	SRSF3	ZC3H13	0.212639	3.23e-06
COAD	erasers	SRSF4	ALKBH5	0.237794	1.77e-07
COAD	readers	SRSF4	FMR1	0.190245	3.24e-05
COAD	erasers	SRSF4	FTO	0.104352	0.0235208
COAD	readers	SRSF4	HNRNPA2B1	0.514259	3.73e-33
COAD	readers	SRSF4	HNRNPC	0.317279	1.78e-12
COAD	readers	SRSF4	IGF2BP2	0.219761	1.47e-06
COAD	readers	SRSF4	IGF2BP3	0.144469	0.00166928
COAD	writers	SRSF4	KIAA1429	0.132805	0.00388515
COAD	readers	SRSF4	LRPPRC	0.180253	8.36e-05
COAD	writers	SRSF4	METTL14	0.296788	4.94e-11
COAD	writers	SRSF4	METTL16	0.23498	2.49e-07
COAD	writers	SRSF4	METTL3	0.150674	0.00103785
COAD	writers	SRSF4	RBM15	0.261051	8.9e-09
COAD	writers	SRSF4	RBM15B	0.211296	3.73e-06
COAD	writers	SRSF4	WTAP	0.148916	0.00118965
COAD	readers	SRSF4	YTHDC1	0.479327	1.98e-28
COAD	readers	SRSF4	YTHDC2	0.303898	1.61e-11
COAD	readers	SRSF4	YTHDF2	0.614756	2.7e-50
COAD	writers	SRSF4	ZC3H13	0.332785	1.21e-13
COAD	readers	SRSF5	FMR1	0.235759	2.27e-07
COAD	readers	SRSF5	HNRNPA2B1	0.429989	1.28e-22
COAD	readers	SRSF5	HNRNPC	0.33608	6.71e-14
COAD	readers	SRSF5	IGF2BP2	0.192279	2.66e-05
COAD	writers	SRSF5	KIAA1429	0.264939	5.24e-09
COAD	readers	SRSF5	LRPPRC	0.229059	5.04e-07
COAD	writers	SRSF5	METTL14	0.258673	1.23e-08
COAD	writers	SRSF5	METTL16	0.150797	0.00102791
COAD	writers	SRSF5	METTL3	0.474204	8.82e-28
COAD	writers	SRSF5	RBM15	0.188101	3.99e-05
COAD	readers	SRSF5	RBMX	0.239017	1.52e-07
COAD	writers	SRSF5	WTAP	0.270124	2.56e-09
COAD	readers	SRSF5	YTHDC1	0.452575	3.68e-25
COAD	readers	SRSF5	YTHDC2	0.300928	2.58e-11
COAD	readers	SRSF5	YTHDF2	0.265812	4.65e-09
COAD	readers	SRSF5	YTHDF3	0.199807	1.25e-05
COAD	writers	SRSF5	ZC3H13	0.323489	6.19e-13
COAD	erasers	SRSF6	ALKBH5	-0.329404	2.21e-13
COAD	readers	SRSF6	FMR1	0.53768	1.21e-36
COAD	erasers	SRSF6	FTO	0.228161	5.6e-07
COAD	readers	SRSF6	HNRNPA2B1	0.351876	3.56e-15
COAD	readers	SRSF6	HNRNPC	0.171935	0.000177216
COAD	readers	SRSF6	IGF2BP1	0.117208	0.0109051
COAD	readers	SRSF6	IGF2BP2	0.23069	4.16e-07
COAD	writers	SRSF6	KIAA1429	0.46394	1.63e-26
COAD	readers	SRSF6	LRPPRC	0.460661	4.05e-26
COAD	writers	SRSF6	METTL14	0.335834	7.01e-14
COAD	writers	SRSF6	METTL16	0.1347	0.0034014
COAD	writers	SRSF6	METTL3	0.291792	1.07e-10
COAD	writers	SRSF6	RBM15	0.311383	4.76e-12
COAD	readers	SRSF6	RBMX	0.535504	2.62e-36
COAD	writers	SRSF6	WTAP	0.432483	6.88e-23
COAD	readers	SRSF6	YTHDC1	0.376263	2.74e-17
COAD	readers	SRSF6	YTHDC2	0.292191	1.01e-10
COAD	readers	SRSF6	YTHDF1	0.587872	4.09e-45
COAD	readers	SRSF6	YTHDF2	0.168561	0.000238034
COAD	readers	SRSF6	YTHDF3	0.457318	1.02e-25
COAD	writers	SRSF6	ZC3H13	0.36518	2.64e-16
COAD	erasers	SRSF7	ALKBH5	-0.144755	0.00163372
COAD	erasers	SRSF7	FTO	-0.211592	3.61e-06
COAD	readers	SRSF7	HNRNPA2B1	0.233075	3.13e-07
COAD	readers	SRSF7	HNRNPC	0.330044	1.97e-13
COAD	readers	SRSF7	LRPPRC	0.357046	1.31e-15
COAD	writers	SRSF7	METTL3	0.328962	2.39e-13
COAD	readers	SRSF7	RBMX	0.515126	2.8e-33
COAD	writers	SRSF7	WTAP	0.238874	1.55e-07
COAD	readers	SRSF7	YTHDF1	0.16956	0.000218234
COAD	readers	SRSF7	YTHDF2	0.155554	0.000705118
COAD	readers	SRSF7	YTHDF3	0.101076	0.0282787
COAD	writers	SRSF7	ZC3H13	-0.212676	3.21e-06
COAD	readers	SRSF8	FMR1	0.138382	0.00261451
COAD	erasers	SRSF8	FTO	0.176248	0.000120548
COAD	readers	SRSF8	HNRNPA2B1	0.218118	1.76e-06
COAD	readers	SRSF8	HNRNPC	0.264868	5.3e-09
COAD	readers	SRSF8	IGF2BP2	0.131532	0.00424395
COAD	writers	SRSF8	KIAA1429	0.285282	2.86e-10
COAD	readers	SRSF8	LRPPRC	0.299737	3.11e-11
COAD	writers	SRSF8	METTL14	0.296222	5.4e-11
COAD	writers	SRSF8	METTL16	0.174129	0.000145843
COAD	writers	SRSF8	RBM15B	0.14621	0.00146362
COAD	readers	SRSF8	RBMX	0.330629	1.78e-13
COAD	writers	SRSF8	WTAP	0.155588	0.000703165
COAD	readers	SRSF8	YTHDC1	0.295167	6.36e-11
COAD	readers	SRSF8	YTHDC2	0.120208	0.00901804
COAD	readers	SRSF8	YTHDF1	0.113077	0.0140724
COAD	readers	SRSF8	YTHDF2	0.335666	7.23e-14
COAD	readers	SRSF8	YTHDF3	0.327008	3.36e-13
COAD	writers	SRSF8	ZC3H13	0.104286	0.0236086
COAD	readers	SRSF9	FMR1	-0.461822	2.94e-26
COAD	erasers	SRSF9	FTO	-0.476209	4.93e-28
COAD	readers	SRSF9	IGF2BP2	-0.171677	0.000181287
COAD	writers	SRSF9	KIAA1429	-0.287946	1.92e-10
COAD	readers	SRSF9	LRPPRC	-0.14198	0.00200967
COAD	writers	SRSF9	METTL14	-0.468969	3.95e-27
COAD	writers	SRSF9	METTL16	-0.191444	2.88e-05
COAD	writers	SRSF9	RBM15	-0.430538	1.12e-22
COAD	writers	SRSF9	RBM15B	0.320097	1.11e-12
COAD	readers	SRSF9	RBMX	-0.118813	0.0098559
COAD	writers	SRSF9	WTAP	-0.319505	1.22e-12
COAD	readers	SRSF9	YTHDC1	-0.323511	6.16e-13
COAD	readers	SRSF9	YTHDC2	-0.427695	2.27e-22
COAD	readers	SRSF9	YTHDF2	-0.161009	0.000451599
COAD	readers	SRSF9	YTHDF3	-0.394636	5.3e-19
COAD	writers	SRSF9	ZC3H13	-0.414237	5.93e-21
DLBC	erasers	SRSF1	ALKBH5	0.51467	0.000182186
DLBC	readers	SRSF1	FMR1	0.555671	4.13e-05
DLBC	erasers	SRSF1	FTO	0.597635	7.29e-06
DLBC	readers	SRSF1	HNRNPA2B1	0.831833	2.41e-13
DLBC	readers	SRSF1	HNRNPC	0.623036	2.25e-06
DLBC	readers	SRSF1	IGF2BP3	0.579661	1.58e-05
DLBC	writers	SRSF1	KIAA1429	0.632641	1.41e-06
DLBC	readers	SRSF1	LRPPRC	0.668139	2.12e-07
DLBC	writers	SRSF1	METTL14	0.550167	5.1e-05
DLBC	writers	SRSF1	METTL3	0.651517	5.3e-07
DLBC	writers	SRSF1	RBM15	0.443161	0.00160773
DLBC	writers	SRSF1	RBM15B	0.485821	0.000464488
DLBC	readers	SRSF1	RBMX	0.787373	3.18e-11
DLBC	readers	SRSF1	YTHDC1	0.71109	1.48e-08
DLBC	readers	SRSF1	YTHDC2	0.721377	7.29e-09
DLBC	readers	SRSF1	YTHDF1	0.499728	0.000298902
DLBC	readers	SRSF1	YTHDF2	0.564616	2.91e-05
DLBC	readers	SRSF1	YTHDF3	0.431166	0.00221697
DLBC	writers	SRSF1	ZC3H13	0.627351	1.83e-06
DLBC	erasers	SRSF10	ALKBH5	0.520487	0.000149307
DLBC	readers	SRSF10	FMR1	0.682301	9.26e-08
DLBC	erasers	SRSF10	FTO	0.702261	2.66e-08
DLBC	readers	SRSF10	HNRNPA2B1	0.870662	8.94e-16
DLBC	readers	SRSF10	HNRNPC	0.605184	5.2e-06
DLBC	readers	SRSF10	IGF2BP3	0.699929	3.09e-08
DLBC	writers	SRSF10	KIAA1429	0.786806	3.36e-11
DLBC	readers	SRSF10	LRPPRC	0.670284	1.87e-07
DLBC	writers	SRSF10	METTL14	0.693414	4.68e-08
DLBC	writers	SRSF10	METTL3	0.740896	1.73e-09
DLBC	writers	SRSF10	RBM15	0.533318	9.5e-05
DLBC	writers	SRSF10	RBM15B	0.462382	0.000937215
DLBC	readers	SRSF10	RBMX	0.72305	6.47e-09
DLBC	readers	SRSF10	YTHDC1	0.835893	1.44e-13
DLBC	readers	SRSF10	YTHDC2	0.840686	7.7e-14
DLBC	readers	SRSF10	YTHDF1	0.49486	0.000349514
DLBC	readers	SRSF10	YTHDF2	0.711799	1.41e-08
DLBC	readers	SRSF10	YTHDF3	0.717269	9.71e-09
DLBC	writers	SRSF10	ZC3H13	0.764694	2.51e-10
DLBC	erasers	SRSF11	ALKBH5	0.506825	0.000236943
DLBC	readers	SRSF11	FMR1	0.705436	2.16e-08
DLBC	erasers	SRSF11	FTO	0.67949	1.1e-07
DLBC	readers	SRSF11	HNRNPA2B1	0.820762	9.21e-13
DLBC	readers	SRSF11	HNRNPC	0.442561	0.00163423
DLBC	readers	SRSF11	IGF2BP3	0.651111	5.42e-07
DLBC	writers	SRSF11	KIAA1429	0.634014	1.31e-06
DLBC	readers	SRSF11	LRPPRC	0.540692	7.27e-05
DLBC	writers	SRSF11	METTL14	0.726383	5.1e-09
DLBC	writers	SRSF11	METTL3	0.751316	7.64e-10
DLBC	writers	SRSF11	RBM15	0.480919	0.000540182
DLBC	writers	SRSF11	RBM15B	0.545386	6.11e-05
DLBC	readers	SRSF11	RBMX	0.547575	5.63e-05
DLBC	readers	SRSF11	YTHDC1	0.84783	2.91e-14
DLBC	readers	SRSF11	YTHDC2	0.856635	8.15e-15
DLBC	readers	SRSF11	YTHDF1	0.583183	1.36e-05
DLBC	readers	SRSF11	YTHDF2	0.669724	1.94e-07
DLBC	readers	SRSF11	YTHDF3	0.699197	3.24e-08
DLBC	writers	SRSF11	ZC3H13	0.731193	3.59e-09
DLBC	erasers	SRSF2	ALKBH5	0.284894	0.049686
DLBC	readers	SRSF2	HNRNPA2B1	0.712221	1.37e-08
DLBC	readers	SRSF2	HNRNPC	0.599409	6.74e-06
DLBC	readers	SRSF2	IGF2BP3	0.331591	0.0213164
DLBC	readers	SRSF2	LRPPRC	0.568795	2.46e-05
DLBC	writers	SRSF2	METTL14	0.292469	0.0436731
DLBC	writers	SRSF2	METTL3	0.484019	0.000491128
DLBC	writers	SRSF2	RBM15	0.419373	0.00300699
DLBC	readers	SRSF2	RBMX	0.690059	5.77e-08
DLBC	readers	SRSF2	YTHDC1	0.425434	0.00257442
DLBC	readers	SRSF2	YTHDC2	0.520091	0.000151361
DLBC	readers	SRSF2	YTHDF1	0.413295	0.0035039
DLBC	readers	SRSF2	YTHDF2	0.484295	0.00048696
DLBC	readers	SRSF3	HNRNPC	0.63194	1.46e-06
DLBC	readers	SRSF3	LRPPRC	0.39408	0.00558113
DLBC	readers	SRSF3	RBMX	0.504131	0.000258936
DLBC	readers	SRSF3	YTHDF3	-0.2934	0.0429768
DLBC	erasers	SRSF4	ALKBH5	0.56033	3.45e-05
DLBC	readers	SRSF4	FMR1	0.662688	2.88e-07
DLBC	erasers	SRSF4	FTO	0.690143	5.74e-08
DLBC	readers	SRSF4	HNRNPA2B1	0.769267	1.69e-10
DLBC	readers	SRSF4	HNRNPC	0.515964	0.000174352
DLBC	readers	SRSF4	IGF2BP3	0.652459	5.04e-07
DLBC	writers	SRSF4	KIAA1429	0.714589	1.17e-08
DLBC	readers	SRSF4	LRPPRC	0.594286	8.45e-06
DLBC	writers	SRSF4	METTL14	0.701634	2.77e-08
DLBC	writers	SRSF4	METTL3	0.665904	2.4e-07
DLBC	writers	SRSF4	RBM15	0.559304	3.59e-05
DLBC	writers	SRSF4	RBM15B	0.576247	1.82e-05
DLBC	readers	SRSF4	RBMX	0.610541	4.07e-06
DLBC	readers	SRSF4	YTHDC1	0.779502	6.7e-11
DLBC	readers	SRSF4	YTHDC2	0.768401	1.82e-10
DLBC	readers	SRSF4	YTHDF1	0.478563	0.000580367
DLBC	readers	SRSF4	YTHDF2	0.734831	2.75e-09
DLBC	readers	SRSF4	YTHDF3	0.663931	2.69e-07
DLBC	writers	SRSF4	ZC3H13	0.686641	7.12e-08
DLBC	erasers	SRSF5	ALKBH5	0.33643	0.0193859
DLBC	readers	SRSF5	FMR1	0.492945	0.000371473
DLBC	erasers	SRSF5	FTO	0.455909	0.00112796
DLBC	readers	SRSF5	HNRNPA2B1	0.549627	5.21e-05
DLBC	readers	SRSF5	IGF2BP3	0.469912	0.000752057
DLBC	writers	SRSF5	KIAA1429	0.325493	0.0239767
DLBC	writers	SRSF5	METTL14	0.615023	3.3e-06
DLBC	writers	SRSF5	METTL3	0.746321	1.14e-09
DLBC	writers	SRSF5	RBM15B	0.546194	5.93e-05
DLBC	readers	SRSF5	RBMX	0.441252	0.0016934
DLBC	readers	SRSF5	YTHDC1	0.581412	1.47e-05
DLBC	readers	SRSF5	YTHDC2	0.57776	1.71e-05
DLBC	readers	SRSF5	YTHDF1	0.309409	0.0323581
DLBC	readers	SRSF5	YTHDF2	0.334605	0.020096
DLBC	readers	SRSF5	YTHDF3	0.392458	0.00579779
DLBC	writers	SRSF5	ZC3H13	0.457455	0.0010795
DLBC	erasers	SRSF6	ALKBH5	0.490353	0.000403155
DLBC	readers	SRSF6	FMR1	0.679794	1.08e-07
DLBC	erasers	SRSF6	FTO	0.688292	6.43e-08
DLBC	readers	SRSF6	HNRNPA2B1	0.868589	1.26e-15
DLBC	readers	SRSF6	HNRNPC	0.480119	0.000553538
DLBC	readers	SRSF6	IGF2BP3	0.622997	2.26e-06
DLBC	writers	SRSF6	KIAA1429	0.584159	1.31e-05
DLBC	readers	SRSF6	LRPPRC	0.475271	0.000641038
DLBC	writers	SRSF6	METTL14	0.715493	1.1e-08
DLBC	writers	SRSF6	METTL3	0.755074	5.63e-10
DLBC	writers	SRSF6	RBM15	0.423511	0.0027053
DLBC	writers	SRSF6	RBM15B	0.645833	7.16e-07
DLBC	readers	SRSF6	RBMX	0.620724	2.52e-06
DLBC	readers	SRSF6	YTHDC1	0.812712	2.31e-12
DLBC	readers	SRSF6	YTHDC2	0.849979	2.15e-14
DLBC	readers	SRSF6	YTHDF1	0.675832	1.36e-07
DLBC	readers	SRSF6	YTHDF2	0.654185	4.59e-07
DLBC	readers	SRSF6	YTHDF3	0.619154	2.71e-06
DLBC	writers	SRSF6	ZC3H13	0.639291	1e-06
DLBC	erasers	SRSF7	ALKBH5	0.378461	0.00799229
DLBC	readers	SRSF7	HNRNPA2B1	0.669637	1.95e-07
DLBC	readers	SRSF7	HNRNPC	0.713546	1.25e-08
DLBC	readers	SRSF7	IGF2BP3	0.304111	0.0356002
DLBC	readers	SRSF7	LRPPRC	0.647891	6.43e-07
DLBC	writers	SRSF7	METTL3	0.516816	0.000169359
DLBC	writers	SRSF7	RBM15	0.313534	0.0300058
DLBC	readers	SRSF7	RBMX	0.672281	1.67e-07
DLBC	readers	SRSF7	YTHDC1	0.375342	0.00856916
DLBC	readers	SRSF7	YTHDC2	0.403135	0.00449681
DLBC	readers	SRSF7	YTHDF2	0.448769	0.00137794
DLBC	writers	SRSF7	ZC3H13	0.323233	0.025031
DLBC	erasers	SRSF8	ALKBH5	0.404036	0.00439973
DLBC	erasers	SRSF8	FTO	0.434592	0.00202493
DLBC	readers	SRSF8	YTHDC1	0.39905	0.00496075
DLBC	writers	SRSF8	ZC3H13	0.349412	0.0149223
DLBC	erasers	SRSF9	ALKBH5	0.518938	0.000157492
DLBC	readers	SRSF9	FMR1	0.558575	3.69e-05
DLBC	erasers	SRSF9	FTO	0.571865	2.18e-05
DLBC	readers	SRSF9	HNRNPA2B1	0.721303	7.33e-09
DLBC	readers	SRSF9	HNRNPC	0.719634	8.24e-09
DLBC	readers	SRSF9	IGF2BP3	0.470646	0.000735892
DLBC	writers	SRSF9	KIAA1429	0.543595	6.53e-05
DLBC	readers	SRSF9	LRPPRC	0.690316	5.68e-08
DLBC	writers	SRSF9	METTL14	0.41473	0.00338043
DLBC	writers	SRSF9	METTL3	0.592677	9.07e-06
DLBC	writers	SRSF9	RBM15B	0.364221	0.0109291
DLBC	readers	SRSF9	RBMX	0.730536	3.77e-09
DLBC	readers	SRSF9	YTHDC1	0.598346	7.07e-06
DLBC	readers	SRSF9	YTHDC2	0.671594	1.74e-07
DLBC	readers	SRSF9	YTHDF2	0.446232	0.00147801
DLBC	readers	SRSF9	YTHDF3	0.425393	0.00257716
DLBC	writers	SRSF9	ZC3H13	0.570284	2.32e-05
ESCA	erasers	SRSF1	ALKBH5	0.159716	0.0423405
ESCA	readers	SRSF1	FMR1	0.304746	8.05e-05
ESCA	readers	SRSF1	HNRNPA2B1	0.679668	2.69e-23
ESCA	readers	SRSF1	HNRNPC	0.536798	1.79e-13
ESCA	readers	SRSF1	IGF2BP1	0.288038	0.00020174
ESCA	readers	SRSF1	IGF2BP2	0.180084	0.021841
ESCA	readers	SRSF1	IGF2BP3	0.198965	0.0111416
ESCA	writers	SRSF1	KIAA1429	0.311827	5.36e-05
ESCA	readers	SRSF1	LRPPRC	0.454772	1.21e-09
ESCA	writers	SRSF1	METTL14	0.303322	8.72e-05
ESCA	writers	SRSF1	METTL16	0.235714	0.0025312
ESCA	writers	SRSF1	METTL3	0.375064	8.76e-07
ESCA	writers	SRSF1	RBM15	0.439242	5e-09
ESCA	readers	SRSF1	RBMX	0.712052	2.35e-26
ESCA	writers	SRSF1	WTAP	0.237336	0.00235815
ESCA	readers	SRSF1	YTHDC1	0.183047	0.0197266
ESCA	readers	SRSF1	YTHDF1	0.365211	1.77e-06
ESCA	readers	SRSF1	YTHDF2	0.407052	7.64e-08
ESCA	readers	SRSF1	YTHDF3	0.291127	0.000170943
ESCA	writers	SRSF1	ZC3H13	0.237926	0.0022979
ESCA	readers	SRSF10	FMR1	0.455955	1.08e-09
ESCA	readers	SRSF10	HNRNPA2B1	0.610982	5.94e-18
ESCA	readers	SRSF10	HNRNPC	0.271468	0.000475263
ESCA	readers	SRSF10	IGF2BP1	0.17317	0.0275452
ESCA	writers	SRSF10	KIAA1429	0.281345	0.000287015
ESCA	readers	SRSF10	LRPPRC	0.211991	0.00676567
ESCA	writers	SRSF10	METTL14	0.553638	2.15e-14
ESCA	writers	SRSF10	METTL3	0.393891	2.15e-07
ESCA	writers	SRSF10	RBM15	0.549838	3.51e-14
ESCA	readers	SRSF10	RBMX	0.683649	1.19e-23
ESCA	writers	SRSF10	WTAP	0.283331	0.00025875
ESCA	readers	SRSF10	YTHDC1	0.479447	1.08e-10
ESCA	readers	SRSF10	YTHDF1	0.296222	0.000129527
ESCA	readers	SRSF10	YTHDF2	0.498681	1.44e-11
ESCA	readers	SRSF10	YTHDF3	0.316996	3.96e-05
ESCA	writers	SRSF10	ZC3H13	0.459543	7.68e-10
ESCA	readers	SRSF11	FMR1	0.469428	2.95e-10
ESCA	readers	SRSF11	HNRNPA2B1	0.403664	1e-07
ESCA	writers	SRSF11	KIAA1429	0.259892	0.000838237
ESCA	writers	SRSF11	METTL14	0.494768	2.2e-11
ESCA	writers	SRSF11	METTL16	0.159545	0.0425644
ESCA	writers	SRSF11	METTL3	0.376804	7.73e-07
ESCA	writers	SRSF11	RBM15	0.455684	1.11e-09
ESCA	writers	SRSF11	RBM15B	-0.17379	0.0269867
ESCA	readers	SRSF11	RBMX	0.433299	8.45e-09
ESCA	writers	SRSF11	WTAP	0.28611	0.00022351
ESCA	readers	SRSF11	YTHDC1	0.51632	2.03e-12
ESCA	readers	SRSF11	YTHDC2	0.227015	0.00367151
ESCA	readers	SRSF11	YTHDF1	0.184386	0.0188314
ESCA	readers	SRSF11	YTHDF2	0.338977	1.02e-05
ESCA	readers	SRSF11	YTHDF3	0.306816	7.15e-05
ESCA	writers	SRSF11	ZC3H13	0.460905	6.75e-10
ESCA	readers	SRSF12	FMR1	0.185174	0.0183208
ESCA	erasers	SRSF12	FTO	0.289684	0.000184743
ESCA	readers	SRSF12	HNRNPC	0.267917	0.000567161
ESCA	readers	SRSF12	IGF2BP1	0.345356	6.77e-06
ESCA	writers	SRSF12	METTL14	0.248162	0.00145208
ESCA	writers	SRSF12	METTL16	0.263733	0.000696331
ESCA	writers	SRSF12	METTL3	0.169394	0.0311667
ESCA	readers	SRSF12	RBMX	0.270649	0.000495146
ESCA	writers	SRSF12	WTAP	0.268172	0.000560054
ESCA	readers	SRSF12	YTHDC1	0.216415	0.00567422
ESCA	readers	SRSF2	FMR1	0.193743	0.0134999
ESCA	readers	SRSF2	HNRNPA2B1	0.515692	2.18e-12
ESCA	readers	SRSF2	HNRNPC	0.556294	1.52e-14
ESCA	writers	SRSF2	METTL14	0.179765	0.0220792
ESCA	writers	SRSF2	METTL3	0.277897	0.000343007
ESCA	writers	SRSF2	RBM15	0.157809	0.044898
ESCA	readers	SRSF2	RBMX	0.623932	7.36e-19
ESCA	writers	SRSF2	WTAP	0.422116	2.21e-08
ESCA	readers	SRSF2	YTHDC1	0.283049	0.000262598
ESCA	readers	SRSF2	YTHDF2	0.301523	9.65e-05
ESCA	writers	SRSF2	ZC3H13	0.236435	0.00245295
ESCA	readers	SRSF3	FMR1	0.273931	0.000419841
ESCA	readers	SRSF3	HNRNPA2B1	0.593635	8.42e-17
ESCA	readers	SRSF3	HNRNPC	0.577892	8.17e-16
ESCA	readers	SRSF3	IGF2BP1	0.239198	0.00217271
ESCA	writers	SRSF3	KIAA1429	0.184427	0.0188047
ESCA	readers	SRSF3	LRPPRC	0.362262	2.17e-06
ESCA	writers	SRSF3	METTL14	0.237034	0.00238952
ESCA	writers	SRSF3	METTL16	0.190512	0.0151686
ESCA	writers	SRSF3	METTL3	0.246869	0.00154041
ESCA	writers	SRSF3	RBM15	0.317741	3.79e-05
ESCA	readers	SRSF3	RBMX	0.722594	1.91e-27
ESCA	writers	SRSF3	WTAP	0.399486	1.39e-07
ESCA	readers	SRSF3	YTHDC1	0.240842	0.00202018
ESCA	readers	SRSF3	YTHDF1	0.306198	7.41e-05
ESCA	readers	SRSF3	YTHDF2	0.349966	4.99e-06
ESCA	writers	SRSF3	ZC3H13	0.16747	0.0331626
ESCA	readers	SRSF4	FMR1	0.305505	7.71e-05
ESCA	readers	SRSF4	HNRNPA2B1	0.210044	0.00730264
ESCA	readers	SRSF4	HNRNPC	0.158911	0.0434039
ESCA	writers	SRSF4	METTL14	0.223013	0.00433729
ESCA	writers	SRSF4	METTL3	0.179529	0.0222579
ESCA	writers	SRSF4	RBM15	0.205732	0.00862891
ESCA	writers	SRSF4	RBM15B	-0.178959	0.022693
ESCA	readers	SRSF4	RBMX	0.196365	0.0122662
ESCA	writers	SRSF4	WTAP	0.265984	0.000623809
ESCA	readers	SRSF4	YTHDC1	0.315379	4.35e-05
ESCA	readers	SRSF4	YTHDF2	0.59111	1.22e-16
ESCA	readers	SRSF5	FMR1	0.2683	0.00055651
ESCA	readers	SRSF5	IGF2BP2	-0.234607	0.00265591
ESCA	readers	SRSF5	IGF2BP3	-0.230055	0.00322893
ESCA	readers	SRSF5	LRPPRC	-0.272173	0.000458745
ESCA	writers	SRSF5	METTL14	0.382853	4.95e-07
ESCA	writers	SRSF5	METTL3	0.388296	3.3e-07
ESCA	writers	SRSF5	RBM15B	-0.265965	0.000624385
ESCA	readers	SRSF5	YTHDC1	0.457742	9.12e-10
ESCA	readers	SRSF5	YTHDC2	0.223279	0.00428984
ESCA	readers	SRSF5	YTHDF2	0.212044	0.00675167
ESCA	writers	SRSF5	ZC3H13	0.461715	6.24e-10
ESCA	readers	SRSF6	FMR1	0.342911	7.93e-06
ESCA	readers	SRSF6	HNRNPA2B1	0.446727	2.54e-09
ESCA	readers	SRSF6	HNRNPC	0.159995	0.0419764
ESCA	readers	SRSF6	IGF2BP1	0.19989	0.0107637
ESCA	writers	SRSF6	KIAA1429	0.276143	0.000375211
ESCA	readers	SRSF6	LRPPRC	0.226124	0.00381127
ESCA	writers	SRSF6	METTL14	0.420657	2.5e-08
ESCA	writers	SRSF6	METTL3	0.394248	2.09e-07
ESCA	writers	SRSF6	RBM15	0.369999	1.26e-06
ESCA	readers	SRSF6	RBMX	0.589623	1.52e-16
ESCA	writers	SRSF6	WTAP	0.198175	0.0114731
ESCA	readers	SRSF6	YTHDC1	0.358901	2.73e-06
ESCA	readers	SRSF6	YTHDF1	0.428826	1.25e-08
ESCA	readers	SRSF6	YTHDF2	0.297928	0.000117898
ESCA	readers	SRSF6	YTHDF3	0.367625	1.49e-06
ESCA	writers	SRSF6	ZC3H13	0.448337	2.19e-09
ESCA	readers	SRSF7	FMR1	0.20218	0.0098771
ESCA	readers	SRSF7	HNRNPA2B1	0.510711	3.83e-12
ESCA	readers	SRSF7	HNRNPC	0.555125	1.78e-14
ESCA	readers	SRSF7	IGF2BP1	0.226984	0.00367635
ESCA	readers	SRSF7	LRPPRC	0.345359	6.77e-06
ESCA	writers	SRSF7	METTL14	0.224445	0.00408758
ESCA	writers	SRSF7	METTL3	0.30765	6.82e-05
ESCA	writers	SRSF7	RBM15	0.30778	6.77e-05
ESCA	readers	SRSF7	RBMX	0.688509	4.31e-24
ESCA	writers	SRSF7	WTAP	0.280073	0.000306598
ESCA	readers	SRSF7	YTHDC1	0.229621	0.00328903
ESCA	readers	SRSF7	YTHDF1	0.285173	0.000234856
ESCA	readers	SRSF7	YTHDF2	0.329446	1.86e-05
ESCA	writers	SRSF7	ZC3H13	0.236826	0.00241132
ESCA	erasers	SRSF8	FTO	-0.190663	0.015087
ESCA	readers	SRSF8	IGF2BP2	-0.184664	0.0186497
ESCA	readers	SRSF8	LRPPRC	0.177599	0.023761
ESCA	writers	SRSF8	WTAP	-0.172007	0.0286205
ESCA	readers	SRSF8	YTHDF2	0.155053	0.0488203
ESCA	readers	SRSF8	YTHDF3	0.179275	0.0224511
ESCA	erasers	SRSF9	ALKBH5	0.242271	0.00189549
ESCA	readers	SRSF9	HNRNPA2B1	0.196322	0.0122855
ESCA	readers	SRSF9	HNRNPC	0.605649	1.37e-17
ESCA	readers	SRSF9	IGF2BP1	0.376628	7.82e-07
ESCA	readers	SRSF9	IGF2BP2	0.217241	0.00548869
ESCA	readers	SRSF9	IGF2BP3	0.280643	0.00029768
ESCA	readers	SRSF9	LRPPRC	0.418506	2.99e-08
ESCA	writers	SRSF9	METTL3	0.180664	0.0214123
ESCA	writers	SRSF9	RBM15B	0.406109	8.24e-08
ESCA	readers	SRSF9	RBMX	0.326631	2.21e-05
ESCA	readers	SRSF9	YTHDC1	-0.159538	0.0425739
ESCA	writers	SRSF9	ZC3H13	-0.241715	0.00194311
GBM	readers	SRSF1	FMR1	0.540708	3.86e-14
GBM	erasers	SRSF1	FTO	0.442653	1.88e-09
GBM	readers	SRSF1	HNRNPA2B1	0.820583	3.5e-42
GBM	readers	SRSF1	HNRNPC	0.223269	0.00362468
GBM	readers	SRSF1	IGF2BP2	0.220211	0.00412756
GBM	readers	SRSF1	IGF2BP3	0.438329	2.81e-09
GBM	writers	SRSF1	KIAA1429	0.578469	2.18e-16
GBM	readers	SRSF1	LRPPRC	0.366276	1.05e-06
GBM	writers	SRSF1	METTL14	0.557025	4.46e-15
GBM	writers	SRSF1	METTL16	0.408137	3.98e-08
GBM	writers	SRSF1	METTL3	0.45765	4.47e-10
GBM	writers	SRSF1	RBM15	0.593199	2.4e-17
GBM	writers	SRSF1	RBM15B	0.610597	1.53e-18
GBM	readers	SRSF1	RBMX	0.632865	3.48e-20
GBM	writers	SRSF1	WTAP	-0.280723	0.000227975
GBM	readers	SRSF1	YTHDC1	0.681271	2.93e-24
GBM	readers	SRSF1	YTHDC2	0.505273	2.85e-12
GBM	readers	SRSF1	YTHDF1	0.284386	0.000186987
GBM	readers	SRSF1	YTHDF2	0.465072	2.14e-10
GBM	readers	SRSF1	YTHDF3	0.234702	0.00219671
GBM	writers	SRSF1	ZC3H13	0.516577	7.62e-13
GBM	readers	SRSF10	FMR1	0.514251	1e-12
GBM	erasers	SRSF10	FTO	0.256326	0.000797178
GBM	readers	SRSF10	HNRNPA2B1	0.642768	5.85e-21
GBM	readers	SRSF10	HNRNPC	0.276793	0.000281135
GBM	readers	SRSF10	IGF2BP1	0.164874	0.0327041
GBM	readers	SRSF10	IGF2BP3	0.48756	2.05e-11
GBM	writers	SRSF10	KIAA1429	0.564826	1.53e-15
GBM	readers	SRSF10	LRPPRC	0.418354	1.67e-08
GBM	writers	SRSF10	METTL14	0.496416	7.75e-12
GBM	writers	SRSF10	METTL16	0.37539	5.33e-07
GBM	writers	SRSF10	METTL3	0.55599	5.14e-15
GBM	writers	SRSF10	RBM15	0.547244	1.65e-14
GBM	writers	SRSF10	RBM15B	0.402453	6.38e-08
GBM	readers	SRSF10	RBMX	0.60956	1.81e-18
GBM	writers	SRSF10	WTAP	-0.158226	0.0405153
GBM	readers	SRSF10	YTHDC1	0.574586	3.83e-16
GBM	readers	SRSF10	YTHDC2	0.558783	3.51e-15
GBM	readers	SRSF10	YTHDF2	0.453975	6.39e-10
GBM	readers	SRSF10	YTHDF3	0.391187	1.58e-07
GBM	writers	SRSF10	ZC3H13	0.454017	6.37e-10
GBM	readers	SRSF11	FMR1	0.420729	1.36e-08
GBM	erasers	SRSF11	FTO	0.16642	0.0310839
GBM	readers	SRSF11	HNRNPA2B1	0.484687	2.79e-11
GBM	readers	SRSF11	HNRNPC	0.230168	0.00268703
GBM	readers	SRSF11	IGF2BP1	0.201777	0.00872017
GBM	readers	SRSF11	IGF2BP3	0.372073	6.83e-07
GBM	writers	SRSF11	KIAA1429	0.355341	2.28e-06
GBM	readers	SRSF11	LRPPRC	0.39724	9.75e-08
GBM	writers	SRSF11	METTL14	0.411536	2.99e-08
GBM	writers	SRSF11	METTL16	0.374115	5.87e-07
GBM	writers	SRSF11	METTL3	0.653905	7.28e-22
GBM	writers	SRSF11	RBM15	0.477072	6.24e-11
GBM	writers	SRSF11	RBM15B	0.198203	0.0100117
GBM	readers	SRSF11	RBMX	0.439755	2.46e-09
GBM	readers	SRSF11	YTHDC1	0.499017	5.79e-12
GBM	readers	SRSF11	YTHDC2	0.637771	1.45e-20
GBM	readers	SRSF11	YTHDF1	0.190332	0.0134659
GBM	readers	SRSF11	YTHDF2	0.214713	0.00519164
GBM	readers	SRSF11	YTHDF3	0.246309	0.00128896
GBM	writers	SRSF11	ZC3H13	0.330499	1.21e-05
GBM	readers	SRSF12	FMR1	0.440417	2.31e-09
GBM	erasers	SRSF12	FTO	0.25495	0.00085253
GBM	readers	SRSF12	HNRNPA2B1	0.326893	1.53e-05
GBM	readers	SRSF12	HNRNPC	0.257812	0.00074114
GBM	readers	SRSF12	IGF2BP3	0.317195	2.8e-05
GBM	writers	SRSF12	KIAA1429	0.29692	9.29e-05
GBM	readers	SRSF12	LRPPRC	0.231975	0.00248078
GBM	writers	SRSF12	METTL14	0.300345	7.64e-05
GBM	writers	SRSF12	METTL16	0.154659	0.045316
GBM	writers	SRSF12	METTL3	0.226101	0.00320892
GBM	writers	SRSF12	RBM15	0.40864	3.82e-08
GBM	writers	SRSF12	RBM15B	0.307931	4.9e-05
GBM	readers	SRSF12	RBMX	0.483908	3.03e-11
GBM	readers	SRSF12	YTHDC1	0.397782	9.33e-08
GBM	readers	SRSF12	YTHDC2	0.186552	0.015468
GBM	readers	SRSF12	YTHDF2	0.221521	0.00390495
GBM	writers	SRSF12	ZC3H13	0.208098	0.0067932
GBM	erasers	SRSF2	ALKBH5	-0.373725	6.04e-07
GBM	readers	SRSF2	FMR1	0.154	0.0462534
GBM	readers	SRSF2	HNRNPA2B1	0.28971	0.000139499
GBM	readers	SRSF2	HNRNPC	0.347062	4.05e-06
GBM	readers	SRSF2	IGF2BP3	0.324057	1.83e-05
GBM	writers	SRSF2	METTL3	0.564236	1.66e-15
GBM	readers	SRSF2	RBMX	0.60357	4.74e-18
GBM	readers	SRSF2	YTHDC2	0.297413	9.04e-05
GBM	readers	SRSF2	YTHDF2	0.222679	0.00371717
GBM	erasers	SRSF3	ALKBH5	-0.347185	4.01e-06
GBM	readers	SRSF3	FMR1	0.176914	0.0217865
GBM	readers	SRSF3	HNRNPC	0.699631	5.11e-26
GBM	readers	SRSF3	IGF2BP3	0.415167	2.2e-08
GBM	writers	SRSF3	METTL3	0.333225	1.02e-05
GBM	readers	SRSF3	RBMX	0.757627	1.42e-32
GBM	writers	SRSF3	WTAP	0.207684	0.00690649
GBM	readers	SRSF3	YTHDF2	0.342007	5.69e-06
GBM	readers	SRSF3	YTHDF3	0.293579	0.00011234
GBM	erasers	SRSF4	ALKBH5	0.378922	4.09e-07
GBM	readers	SRSF4	FMR1	0.386016	2.37e-07
GBM	erasers	SRSF4	FTO	0.291852	0.000123791
GBM	readers	SRSF4	HNRNPA2B1	0.684779	1.38e-24
GBM	readers	SRSF4	IGF2BP3	0.231005	0.00258966
GBM	writers	SRSF4	KIAA1429	0.400777	7.31e-08
GBM	readers	SRSF4	LRPPRC	0.229357	0.0027845
GBM	writers	SRSF4	METTL14	0.436746	3.25e-09
GBM	writers	SRSF4	METTL16	0.359197	1.74e-06
GBM	writers	SRSF4	METTL3	0.353172	2.66e-06
GBM	writers	SRSF4	RBM15	0.628072	8.06e-20
GBM	writers	SRSF4	RBM15B	0.559704	3.1e-15
GBM	readers	SRSF4	RBMX	0.312212	3.79e-05
GBM	writers	SRSF4	WTAP	-0.255175	0.000843243
GBM	readers	SRSF4	YTHDC1	0.633614	3.05e-20
GBM	readers	SRSF4	YTHDC2	0.299769	7.89e-05
GBM	readers	SRSF4	YTHDF1	0.246954	0.0012504
GBM	readers	SRSF4	YTHDF2	0.484689	2.79e-11
GBM	writers	SRSF4	ZC3H13	0.387567	2.1e-07
GBM	readers	SRSF5	FMR1	0.284641	0.000184402
GBM	readers	SRSF5	HNRNPA2B1	0.395366	1.13e-07
GBM	readers	SRSF5	IGF2BP3	0.189432	0.013921
GBM	writers	SRSF5	METTL14	0.317219	2.79e-05
GBM	writers	SRSF5	METTL16	0.269631	0.000408677
GBM	writers	SRSF5	METTL3	0.687695	7.35e-25
GBM	writers	SRSF5	RBM15B	0.200687	0.00909734
GBM	readers	SRSF5	RBMX	0.233102	0.00235952
GBM	readers	SRSF5	YTHDC1	0.385278	2.51e-07
GBM	readers	SRSF5	YTHDC2	0.533623	9.5e-14
GBM	readers	SRSF5	YTHDF1	0.22449	0.00343975
GBM	writers	SRSF5	ZC3H13	0.330546	1.21e-05
GBM	erasers	SRSF6	ALKBH5	-0.264357	0.00053482
GBM	readers	SRSF6	FMR1	0.240249	0.00170799
GBM	readers	SRSF6	HNRNPA2B1	0.376115	5.05e-07
GBM	readers	SRSF6	IGF2BP1	0.151995	0.049205
GBM	readers	SRSF6	IGF2BP2	0.177623	0.0212553
GBM	readers	SRSF6	IGF2BP3	0.431856	5.07e-09
GBM	writers	SRSF6	KIAA1429	0.248868	0.00114215
GBM	writers	SRSF6	METTL14	0.215309	0.00506553
GBM	writers	SRSF6	METTL16	0.182824	0.0176918
GBM	writers	SRSF6	METTL3	0.635823	2.06e-20
GBM	writers	SRSF6	RBM15B	0.232699	0.00240226
GBM	readers	SRSF6	RBMX	0.471572	1.1e-10
GBM	readers	SRSF6	YTHDC1	0.256495	0.000790622
GBM	readers	SRSF6	YTHDC2	0.490298	1.52e-11
GBM	readers	SRSF6	YTHDF1	0.297943	8.77e-05
GBM	readers	SRSF6	YTHDF3	0.271748	0.000366285
GBM	writers	SRSF6	ZC3H13	0.246634	0.00126938
GBM	erasers	SRSF7	ALKBH5	-0.374826	5.56e-07
GBM	erasers	SRSF7	FTO	-0.225993	0.00322387
GBM	readers	SRSF7	HNRNPC	0.605129	3.7e-18
GBM	readers	SRSF7	IGF2BP1	0.183672	0.0171627
GBM	readers	SRSF7	IGF2BP3	0.479249	4.97e-11
GBM	writers	SRSF7	METTL3	0.438805	2.69e-09
GBM	readers	SRSF7	RBMX	0.675699	9.45e-24
GBM	writers	SRSF7	WTAP	0.174211	0.0239164
GBM	readers	SRSF7	YTHDF2	0.286375	0.000167718
GBM	readers	SRSF7	YTHDF3	0.244556	0.00139931
GBM	writers	SRSF7	ZC3H13	-0.191849	0.0127288
GBM	erasers	SRSF8	ALKBH5	-0.233408	0.00232762
GBM	erasers	SRSF8	FTO	0.210975	0.00604926
GBM	readers	SRSF8	HNRNPC	0.220752	0.00403431
GBM	readers	SRSF8	IGF2BP3	0.297932	8.77e-05
GBM	readers	SRSF8	LRPPRC	0.197603	0.0102444
GBM	readers	SRSF8	RBMX	0.273346	0.00033703
GBM	readers	SRSF9	HNRNPA2B1	0.316331	2.95e-05
GBM	readers	SRSF9	HNRNPC	0.401018	7.17e-08
GBM	readers	SRSF9	IGF2BP2	0.191163	0.0130577
GBM	readers	SRSF9	IGF2BP3	0.383666	2.84e-07
GBM	writers	SRSF9	KIAA1429	0.201814	0.00870758
GBM	writers	SRSF9	METTL3	0.169477	0.0280786
GBM	writers	SRSF9	RBM15B	0.352613	2.76e-06
GBM	readers	SRSF9	RBMX	0.533473	9.68e-14
GBM	readers	SRSF9	YTHDF2	0.426105	8.48e-09
HNSC	erasers	SRSF1	ALKBH5	0.217574	8.58e-07
HNSC	readers	SRSF1	FMR1	0.499964	4.18e-33
HNSC	erasers	SRSF1	FTO	0.15036	0.000725658
HNSC	readers	SRSF1	HNRNPA2B1	0.728821	2.76e-84
HNSC	readers	SRSF1	HNRNPC	0.566607	5.72e-44
HNSC	readers	SRSF1	IGF2BP1	0.178876	5.57e-05
HNSC	readers	SRSF1	IGF2BP2	0.0885515	0.0473697
HNSC	readers	SRSF1	IGF2BP3	0.236071	8.7e-08
HNSC	writers	SRSF1	KIAA1429	0.337641	7.51e-15
HNSC	readers	SRSF1	LRPPRC	0.472637	2.67e-29
HNSC	writers	SRSF1	METTL14	0.551113	3.19e-41
HNSC	writers	SRSF1	METTL16	0.199284	6.82e-06
HNSC	writers	SRSF1	METTL3	0.482435	1.26e-30
HNSC	writers	SRSF1	RBM15	0.494362	2.69e-32
HNSC	writers	SRSF1	RBM15B	0.39935	1.21e-20
HNSC	readers	SRSF1	RBMX	0.67895	4.19e-69
HNSC	writers	SRSF1	WTAP	0.361945	5.53e-17
HNSC	readers	SRSF1	YTHDC1	0.560928	6.04e-43
HNSC	readers	SRSF1	YTHDC2	0.443199	1.44e-25
HNSC	readers	SRSF1	YTHDF1	0.286004	6.63e-11
HNSC	readers	SRSF1	YTHDF2	0.471492	3.79e-29
HNSC	readers	SRSF1	YTHDF3	0.277971	2.33e-10
HNSC	writers	SRSF1	ZC3H13	0.330922	2.71e-14
HNSC	erasers	SRSF10	ALKBH5	0.306743	2.13e-12
HNSC	readers	SRSF10	FMR1	0.622451	3.49e-55
HNSC	erasers	SRSF10	FTO	0.19495	1.09e-05
HNSC	readers	SRSF10	HNRNPA2B1	0.679847	2.37e-69
HNSC	readers	SRSF10	HNRNPC	0.550034	4.9e-41
HNSC	readers	SRSF10	IGF2BP1	0.0999069	0.0251902
HNSC	readers	SRSF10	IGF2BP3	0.278829	2.04e-10
HNSC	writers	SRSF10	KIAA1429	0.37302	5.1e-18
HNSC	readers	SRSF10	LRPPRC	0.413614	3.63e-22
HNSC	writers	SRSF10	METTL14	0.625185	8.61e-56
HNSC	writers	SRSF10	METTL16	0.208106	2.57e-06
HNSC	writers	SRSF10	METTL3	0.558245	1.81e-42
HNSC	writers	SRSF10	RBM15	0.555317	5.93e-42
HNSC	writers	SRSF10	RBM15B	0.335442	1.15e-14
HNSC	readers	SRSF10	RBMX	0.717136	1.96e-80
HNSC	writers	SRSF10	WTAP	0.462507	5.65e-28
HNSC	readers	SRSF10	YTHDC1	0.686114	4.26e-71
HNSC	readers	SRSF10	YTHDC2	0.539649	2.79e-39
HNSC	readers	SRSF10	YTHDF1	0.240089	5.16e-08
HNSC	readers	SRSF10	YTHDF2	0.527368	2.78e-37
HNSC	readers	SRSF10	YTHDF3	0.419173	8.84e-23
HNSC	writers	SRSF10	ZC3H13	0.333576	1.64e-14
HNSC	erasers	SRSF11	ALKBH5	0.209754	2.13e-06
HNSC	readers	SRSF11	FMR1	0.560984	5.9e-43
HNSC	erasers	SRSF11	FTO	0.121403	0.00646166
HNSC	readers	SRSF11	HNRNPA2B1	0.635534	3.77e-58
HNSC	readers	SRSF11	HNRNPC	0.430241	4.9e-24
HNSC	readers	SRSF11	IGF2BP1	0.140361	0.00161812
HNSC	readers	SRSF11	IGF2BP3	0.254801	7.02e-09
HNSC	writers	SRSF11	KIAA1429	0.188751	2.07e-05
HNSC	readers	SRSF11	LRPPRC	0.345742	1.53e-15
HNSC	writers	SRSF11	METTL14	0.502538	1.76e-33
HNSC	writers	SRSF11	METTL16	0.137945	0.00194949
HNSC	writers	SRSF11	METTL3	0.54876	8.11e-41
HNSC	writers	SRSF11	RBM15	0.367016	1.88e-17
HNSC	writers	SRSF11	RBM15B	0.228267	2.34e-07
HNSC	readers	SRSF11	RBMX	0.519587	4.67e-36
HNSC	writers	SRSF11	WTAP	0.458384	1.9e-27
HNSC	readers	SRSF11	YTHDC1	0.724997	5.28e-83
HNSC	readers	SRSF11	YTHDC2	0.495161	2.07e-32
HNSC	readers	SRSF11	YTHDF1	0.316872	3.59e-13
HNSC	readers	SRSF11	YTHDF2	0.427912	9.08e-24
HNSC	readers	SRSF11	YTHDF3	0.273642	4.51e-10
HNSC	writers	SRSF11	ZC3H13	0.269497	8.41e-10
HNSC	erasers	SRSF12	ALKBH5	0.231473	1.57e-07
HNSC	readers	SRSF12	FMR1	0.185164	2.99e-05
HNSC	readers	SRSF12	HNRNPA2B1	0.183322	3.59e-05
HNSC	readers	SRSF12	HNRNPC	0.164087	0.000222225
HNSC	readers	SRSF12	IGF2BP1	0.229516	2e-07
HNSC	readers	SRSF12	IGF2BP3	0.147849	0.000891737
HNSC	readers	SRSF12	LRPPRC	0.208375	2.49e-06
HNSC	writers	SRSF12	METTL16	0.308076	1.69e-12
HNSC	writers	SRSF12	METTL3	0.207551	2.73e-06
HNSC	writers	SRSF12	RBM15	0.2014	5.42e-06
HNSC	writers	SRSF12	RBM15B	0.17251	0.000102464
HNSC	readers	SRSF12	RBMX	0.41596	2.01e-22
HNSC	writers	SRSF12	WTAP	0.311127	9.94e-13
HNSC	readers	SRSF12	YTHDC1	0.130918	0.00329693
HNSC	readers	SRSF12	YTHDF1	0.127131	0.0043321
HNSC	erasers	SRSF2	ALKBH5	0.138907	0.00181069
HNSC	readers	SRSF2	FMR1	0.449832	2.23e-26
HNSC	erasers	SRSF2	FTO	-0.114874	0.00999744
HNSC	readers	SRSF2	HNRNPA2B1	0.69606	5.83e-74
HNSC	readers	SRSF2	HNRNPC	0.588595	4e-48
HNSC	readers	SRSF2	IGF2BP1	0.141717	0.0014556
HNSC	readers	SRSF2	IGF2BP3	0.137413	0.00203035
HNSC	readers	SRSF2	LRPPRC	0.357875	1.3e-16
HNSC	writers	SRSF2	METTL14	0.433837	1.87e-24
HNSC	writers	SRSF2	METTL16	0.129023	0.003783
HNSC	writers	SRSF2	METTL3	0.540866	1.75e-39
HNSC	writers	SRSF2	RBM15	0.359806	8.66e-17
HNSC	writers	SRSF2	RBM15B	0.247296	1.97e-08
HNSC	readers	SRSF2	RBMX	0.697853	1.73e-74
HNSC	writers	SRSF2	WTAP	0.518126	7.87e-36
HNSC	readers	SRSF2	YTHDC1	0.568805	2.27e-44
HNSC	readers	SRSF2	YTHDC2	0.324126	9.62e-14
HNSC	readers	SRSF2	YTHDF1	0.274448	3.99e-10
HNSC	readers	SRSF2	YTHDF2	0.373927	4.18e-18
HNSC	erasers	SRSF3	ALKBH5	0.113377	0.0110179
HNSC	readers	SRSF3	FMR1	0.361185	6.49e-17
HNSC	erasers	SRSF3	FTO	-0.184305	3.26e-05
HNSC	readers	SRSF3	HNRNPA2B1	0.574079	2.4e-45
HNSC	readers	SRSF3	HNRNPC	0.657178	2.2e-63
HNSC	readers	SRSF3	IGF2BP1	0.160204	0.000313629
HNSC	readers	SRSF3	IGF2BP3	0.118859	0.00767838
HNSC	readers	SRSF3	LRPPRC	0.33982	4.92e-15
HNSC	writers	SRSF3	METTL14	0.358143	1.23e-16
HNSC	writers	SRSF3	METTL16	0.221863	5.13e-07
HNSC	writers	SRSF3	METTL3	0.412096	5.32e-22
HNSC	writers	SRSF3	RBM15	0.41724	1.45e-22
HNSC	writers	SRSF3	RBM15B	0.146699	0.000978991
HNSC	readers	SRSF3	RBMX	0.73689	4.59e-87
HNSC	writers	SRSF3	WTAP	0.527579	2.58e-37
HNSC	readers	SRSF3	YTHDC1	0.407231	1.78e-21
HNSC	readers	SRSF3	YTHDC2	0.173756	9.11e-05
HNSC	readers	SRSF3	YTHDF1	0.152821	0.00059109
HNSC	readers	SRSF3	YTHDF2	0.322644	1.26e-13
HNSC	writers	SRSF3	ZC3H13	-0.107051	0.0164201
HNSC	erasers	SRSF4	ALKBH5	0.402593	5.54e-21
HNSC	readers	SRSF4	FMR1	0.592631	6.36e-49
HNSC	erasers	SRSF4	FTO	0.264339	1.8e-09
HNSC	readers	SRSF4	HNRNPA2B1	0.671657	3.92e-67
HNSC	readers	SRSF4	HNRNPC	0.398968	1.33e-20
HNSC	readers	SRSF4	IGF2BP1	0.0993752	0.0259807
HNSC	readers	SRSF4	IGF2BP3	0.165277	0.000199636
HNSC	writers	SRSF4	KIAA1429	0.257505	4.8e-09
HNSC	readers	SRSF4	LRPPRC	0.275734	3.28e-10
HNSC	writers	SRSF4	METTL14	0.507782	2.94e-34
HNSC	writers	SRSF4	METTL3	0.379752	1.15e-18
HNSC	writers	SRSF4	RBM15	0.406763	2e-21
HNSC	writers	SRSF4	RBM15B	0.420612	6.1e-23
HNSC	readers	SRSF4	RBMX	0.477079	6.77e-30
HNSC	writers	SRSF4	WTAP	0.385055	3.45e-19
HNSC	readers	SRSF4	YTHDC1	0.683615	2.14e-70
HNSC	readers	SRSF4	YTHDC2	0.399216	1.25e-20
HNSC	readers	SRSF4	YTHDF1	0.257333	4.91e-09
HNSC	readers	SRSF4	YTHDF2	0.539736	2.7e-39
HNSC	readers	SRSF4	YTHDF3	0.217291	8.87e-07
HNSC	writers	SRSF4	ZC3H13	0.349226	7.62e-16
HNSC	erasers	SRSF5	ALKBH5	-0.0948779	0.033564
HNSC	readers	SRSF5	FMR1	0.257152	5.04e-09
HNSC	erasers	SRSF5	FTO	-0.193784	1.23e-05
HNSC	readers	SRSF5	HNRNPA2B1	0.430526	4.54e-24
HNSC	readers	SRSF5	HNRNPC	0.246381	2.23e-08
HNSC	readers	SRSF5	IGF2BP1	0.0926755	0.0379198
HNSC	writers	SRSF5	METTL14	0.261883	2.57e-09
HNSC	writers	SRSF5	METTL3	0.483193	9.93e-31
HNSC	writers	SRSF5	RBM15	0.0955097	0.0323962
HNSC	writers	SRSF5	RBM15B	0.12305	0.00576941
HNSC	readers	SRSF5	RBMX	0.344515	1.95e-15
HNSC	writers	SRSF5	WTAP	0.214528	1.23e-06
HNSC	readers	SRSF5	YTHDC1	0.418814	9.69e-23
HNSC	readers	SRSF5	YTHDC2	0.288711	4.3e-11
HNSC	readers	SRSF5	YTHDF1	0.169967	0.000129948
HNSC	readers	SRSF5	YTHDF2	0.210651	1.92e-06
HNSC	erasers	SRSF6	ALKBH5	0.14453	0.00116528
HNSC	readers	SRSF6	FMR1	0.418601	1.02e-22
HNSC	readers	SRSF6	HNRNPA2B1	0.550297	4.41e-41
HNSC	readers	SRSF6	HNRNPC	0.438896	4.73e-25
HNSC	readers	SRSF6	IGF2BP1	0.190566	1.72e-05
HNSC	readers	SRSF6	IGF2BP3	0.173912	8.98e-05
HNSC	writers	SRSF6	KIAA1429	0.244653	2.82e-08
HNSC	readers	SRSF6	LRPPRC	0.320265	1.95e-13
HNSC	writers	SRSF6	METTL14	0.495949	1.59e-32
HNSC	writers	SRSF6	METTL16	0.161264	0.000285681
HNSC	writers	SRSF6	METTL3	0.559406	1.13e-42
HNSC	writers	SRSF6	RBM15	0.324698	8.66e-14
HNSC	writers	SRSF6	RBM15B	0.301948	4.84e-12
HNSC	readers	SRSF6	RBMX	0.622214	3.94e-55
HNSC	writers	SRSF6	WTAP	0.355502	2.12e-16
HNSC	readers	SRSF6	YTHDC1	0.543924	5.38e-40
HNSC	readers	SRSF6	YTHDC2	0.352037	4.31e-16
HNSC	readers	SRSF6	YTHDF1	0.447692	4.09e-26
HNSC	readers	SRSF6	YTHDF2	0.377669	1.83e-18
HNSC	readers	SRSF6	YTHDF3	0.240894	4.64e-08
HNSC	writers	SRSF6	ZC3H13	0.197456	8.31e-06
HNSC	erasers	SRSF7	ALKBH5	0.230574	1.75e-07
HNSC	readers	SRSF7	FMR1	0.449688	2.33e-26
HNSC	readers	SRSF7	HNRNPA2B1	0.673485	1.27e-67
HNSC	readers	SRSF7	HNRNPC	0.681301	9.43e-70
HNSC	readers	SRSF7	IGF2BP1	0.228331	2.32e-07
HNSC	readers	SRSF7	IGF2BP3	0.208839	2.36e-06
HNSC	writers	SRSF7	KIAA1429	0.124411	0.00524833
HNSC	readers	SRSF7	LRPPRC	0.469076	7.89e-29
HNSC	writers	SRSF7	METTL14	0.431793	3.24e-24
HNSC	writers	SRSF7	METTL16	0.203631	4.24e-06
HNSC	writers	SRSF7	METTL3	0.538234	4.79e-39
HNSC	writers	SRSF7	RBM15	0.433222	2.21e-24
HNSC	writers	SRSF7	RBM15B	0.276944	2.73e-10
HNSC	readers	SRSF7	RBMX	0.773457	4.53e-101
HNSC	writers	SRSF7	WTAP	0.50885	2.03e-34
HNSC	readers	SRSF7	YTHDC1	0.501701	2.33e-33
HNSC	readers	SRSF7	YTHDC2	0.275694	3.3e-10
HNSC	readers	SRSF7	YTHDF1	0.238826	6.09e-08
HNSC	readers	SRSF7	YTHDF2	0.338383	6.5e-15
HNSC	readers	SRSF7	YTHDF3	0.0995434	0.0257283
HNSC	readers	SRSF8	FMR1	0.095768	0.0319288
HNSC	erasers	SRSF8	FTO	0.228325	2.32e-07
HNSC	readers	SRSF8	IGF2BP1	0.14171	0.00145646
HNSC	readers	SRSF8	IGF2BP3	0.113315	0.0110622
HNSC	writers	SRSF8	KIAA1429	0.10233	0.0218455
HNSC	readers	SRSF8	LRPPRC	0.148181	0.000867932
HNSC	writers	SRSF8	METTL14	0.130116	0.0034953
HNSC	writers	SRSF8	RBM15	-0.138816	0.00182343
HNSC	writers	SRSF8	RBM15B	0.239028	5.93e-08
HNSC	readers	SRSF8	YTHDC1	0.123473	0.00560275
HNSC	readers	SRSF8	YTHDC2	0.122188	0.00612297
HNSC	readers	SRSF8	YTHDF1	0.197379	8.38e-06
HNSC	readers	SRSF8	YTHDF2	0.14559	0.00107051
HNSC	readers	SRSF8	YTHDF3	0.165948	0.000187882
HNSC	writers	SRSF8	ZC3H13	0.216752	9.45e-07
HNSC	erasers	SRSF9	ALKBH5	0.334867	1.28e-14
HNSC	readers	SRSF9	FMR1	0.338681	6.14e-15
HNSC	erasers	SRSF9	FTO	0.127384	0.00425483
HNSC	readers	SRSF9	HNRNPA2B1	0.513986	3.4e-35
HNSC	readers	SRSF9	HNRNPC	0.559442	1.11e-42
HNSC	readers	SRSF9	IGF2BP1	0.215074	1.15e-06
HNSC	readers	SRSF9	IGF2BP2	0.251221	1.15e-08
HNSC	readers	SRSF9	IGF2BP3	0.361892	5.59e-17
HNSC	writers	SRSF9	KIAA1429	0.154585	0.000509302
HNSC	readers	SRSF9	LRPPRC	0.481655	1.62e-30
HNSC	writers	SRSF9	METTL14	0.345855	1.5e-15
HNSC	writers	SRSF9	METTL3	0.381662	7.46e-19
HNSC	writers	SRSF9	RBM15	0.218079	8.08e-07
HNSC	writers	SRSF9	RBM15B	0.335922	1.05e-14
HNSC	readers	SRSF9	RBMX	0.47947	3.21e-30
HNSC	writers	SRSF9	WTAP	0.331415	2.47e-14
HNSC	readers	SRSF9	YTHDC1	0.434527	1.55e-24
HNSC	readers	SRSF9	YTHDC2	0.214727	1.2e-06
HNSC	readers	SRSF9	YTHDF1	0.343323	2.47e-15
HNSC	readers	SRSF9	YTHDF2	0.224904	3.55e-07
HNSC	readers	SRSF9	YTHDF3	0.110541	0.0132071
HNSC	writers	SRSF9	ZC3H13	0.14351	0.0012638
KICH	erasers	SRSF1	ALKBH5	0.374173	0.00213686
KICH	erasers	SRSF1	FTO	0.545257	2.65e-06
KICH	readers	SRSF1	HNRNPA2B1	0.706146	5.01e-11
KICH	readers	SRSF1	HNRNPC	0.722172	1.13e-11
KICH	readers	SRSF1	IGF2BP1	0.383628	0.00160754
KICH	writers	SRSF1	KIAA1429	0.469004	8.12e-05
KICH	readers	SRSF1	LRPPRC	0.334367	0.00648335
KICH	writers	SRSF1	METTL14	0.410748	0.000677276
KICH	writers	SRSF1	METTL16	0.372578	0.00224014
KICH	writers	SRSF1	METTL3	0.353495	0.00387014
KICH	writers	SRSF1	RBM15	0.580475	4.01e-07
KICH	readers	SRSF1	RBMX	0.612019	6.07e-08
KICH	writers	SRSF1	WTAP	0.516192	1.08e-05
KICH	readers	SRSF1	YTHDC1	0.625879	2.47e-08
KICH	readers	SRSF1	YTHDC2	0.589312	2.41e-07
KICH	readers	SRSF1	YTHDF1	0.460868	0.000111833
KICH	readers	SRSF1	YTHDF2	0.517439	1.02e-05
KICH	readers	SRSF1	YTHDF3	0.385429	0.00152126
KICH	writers	SRSF1	ZC3H13	0.572098	6.41e-07
KICH	erasers	SRSF10	ALKBH5	0.400481	0.000947539
KICH	readers	SRSF10	FMR1	0.30359	0.0139535
KICH	erasers	SRSF10	FTO	0.61223	5.99e-08
KICH	readers	SRSF10	HNRNPA2B1	0.761346	1.81e-13
KICH	readers	SRSF10	HNRNPC	0.782614	1.36e-14
KICH	readers	SRSF10	IGF2BP1	0.321797	0.00894889
KICH	readers	SRSF10	IGF2BP3	0.3555	0.00365963
KICH	writers	SRSF10	KIAA1429	0.67854	5.26e-10
KICH	readers	SRSF10	LRPPRC	0.569545	7.37e-07
KICH	writers	SRSF10	METTL14	0.489167	3.55e-05
KICH	writers	SRSF10	METTL16	0.554529	1.64e-06
KICH	writers	SRSF10	METTL3	0.363853	0.00288805
KICH	writers	SRSF10	RBM15	0.725462	8.18e-12
KICH	readers	SRSF10	RBMX	0.587957	2.61e-07
KICH	writers	SRSF10	WTAP	0.57243	6.29e-07
KICH	readers	SRSF10	YTHDC1	0.71097	3.23e-11
KICH	readers	SRSF10	YTHDC2	0.534026	4.62e-06
KICH	readers	SRSF10	YTHDF1	0.55099	1.97e-06
KICH	readers	SRSF10	YTHDF2	0.726517	7.37e-12
KICH	readers	SRSF10	YTHDF3	0.595729	1.65e-07
KICH	writers	SRSF10	ZC3H13	0.645539	6.41e-09
KICH	erasers	SRSF11	ALKBH5	0.445401	0.000200894
KICH	erasers	SRSF11	FTO	0.630494	1.82e-08
KICH	readers	SRSF11	HNRNPA2B1	0.678284	5.37e-10
KICH	readers	SRSF11	HNRNPC	0.769211	7.18e-14
KICH	readers	SRSF11	IGF2BP1	0.261334	0.0354874
KICH	readers	SRSF11	IGF2BP3	0.29075	0.0187922
KICH	writers	SRSF11	KIAA1429	0.378495	0.0018781
KICH	readers	SRSF11	LRPPRC	0.551322	1.94e-06
KICH	writers	SRSF11	METTL14	0.298238	0.0158214
KICH	writers	SRSF11	METTL16	0.379742	0.00180889
KICH	writers	SRSF11	RBM15	0.715932	2.04e-11
KICH	readers	SRSF11	RBMX	0.601584	1.16e-07
KICH	writers	SRSF11	WTAP	0.670123	1.03e-09
KICH	readers	SRSF11	YTHDC1	0.601929	1.13e-07
KICH	readers	SRSF11	YTHDC2	0.466803	8.87e-05
KICH	readers	SRSF11	YTHDF1	0.459438	0.000118198
KICH	readers	SRSF11	YTHDF2	0.651158	4.28e-09
KICH	readers	SRSF11	YTHDF3	0.314471	0.0107343
KICH	writers	SRSF11	ZC3H13	0.598485	1.4e-07
KICH	erasers	SRSF12	ALKBH5	0.598508	1.4e-07
KICH	erasers	SRSF12	FTO	0.329941	0.00727334
KICH	readers	SRSF12	HNRNPC	0.292904	0.0178926
KICH	readers	SRSF12	IGF2BP2	-0.557864	1.38e-06
KICH	readers	SRSF12	LRPPRC	0.421807	0.000466032
KICH	writers	SRSF12	METTL3	-0.249234	0.0452727
KICH	writers	SRSF12	RBM15	0.383159	0.00163071
KICH	writers	SRSF12	WTAP	0.505657	1.73e-05
KICH	readers	SRSF12	YTHDF2	0.482994	4.6e-05
KICH	writers	SRSF12	ZC3H13	0.290202	0.0190273
KICH	erasers	SRSF2	ALKBH5	0.274081	0.0271518
KICH	erasers	SRSF2	FTO	0.323664	0.00853751
KICH	readers	SRSF2	HNRNPA2B1	0.507345	1.61e-05
KICH	readers	SRSF2	HNRNPC	0.517878	9.96e-06
KICH	readers	SRSF2	IGF2BP1	0.421809	0.000465995
KICH	readers	SRSF2	IGF2BP3	0.348817	0.00440343
KICH	writers	SRSF2	KIAA1429	0.465591	9.3e-05
KICH	writers	SRSF2	METTL14	0.259528	0.0368251
KICH	writers	SRSF2	METTL16	0.320778	0.00918069
KICH	writers	SRSF2	METTL3	0.251355	0.0434122
KICH	writers	SRSF2	RBM15	0.510149	1.42e-05
KICH	writers	SRSF2	RBM15B	0.36644	0.00268046
KICH	readers	SRSF2	RBMX	0.402907	0.000876104
KICH	writers	SRSF2	WTAP	0.460503	0.000113428
KICH	readers	SRSF2	YTHDC1	0.429289	0.000359248
KICH	readers	SRSF2	YTHDC2	0.396125	0.00108916
KICH	readers	SRSF2	YTHDF1	0.527395	6.36e-06
KICH	readers	SRSF2	YTHDF2	0.525893	6.84e-06
KICH	readers	SRSF2	YTHDF3	0.456075	0.000134498
KICH	writers	SRSF2	ZC3H13	0.308816	0.0123162
KICH	readers	SRSF3	FMR1	0.273606	0.0274298
KICH	erasers	SRSF3	FTO	0.578881	4.39e-07
KICH	readers	SRSF3	HNRNPA2B1	0.69245	1.66e-10
KICH	readers	SRSF3	HNRNPC	0.749767	6.64e-13
KICH	readers	SRSF3	IGF2BP3	0.371453	0.00231563
KICH	writers	SRSF3	KIAA1429	0.629019	2.01e-08
KICH	readers	SRSF3	LRPPRC	0.476131	6.1e-05
KICH	writers	SRSF3	METTL14	0.507828	1.57e-05
KICH	writers	SRSF3	METTL16	0.454504	0.000142798
KICH	writers	SRSF3	METTL3	0.388999	0.0013624
KICH	writers	SRSF3	RBM15	0.542371	3.06e-06
KICH	readers	SRSF3	RBMX	0.68975	2.09e-10
KICH	writers	SRSF3	WTAP	0.5308	5.4e-06
KICH	readers	SRSF3	YTHDC1	0.711662	3.03e-11
KICH	readers	SRSF3	YTHDC2	0.587038	2.75e-07
KICH	readers	SRSF3	YTHDF1	0.569276	7.48e-07
KICH	readers	SRSF3	YTHDF2	0.561926	1.11e-06
KICH	readers	SRSF3	YTHDF3	0.548865	2.2e-06
KICH	writers	SRSF3	ZC3H13	0.625901	2.47e-08
KICH	erasers	SRSF4	ALKBH5	0.393379	0.00118797
KICH	erasers	SRSF4	FTO	0.351502	0.00408993
KICH	readers	SRSF4	HNRNPA2B1	0.51554	1.11e-05
KICH	readers	SRSF4	HNRNPC	0.643897	7.2e-09
KICH	readers	SRSF4	IGF2BP1	0.383211	0.00162813
KICH	writers	SRSF4	KIAA1429	0.300005	0.0151825
KICH	readers	SRSF4	LRPPRC	0.311556	0.0115261
KICH	writers	SRSF4	RBM15	0.68292	3.69e-10
KICH	readers	SRSF4	RBMX	0.406075	0.000790153
KICH	writers	SRSF4	WTAP	0.448639	0.000178123
KICH	readers	SRSF4	YTHDC1	0.440868	0.000237276
KICH	readers	SRSF4	YTHDF1	0.333661	0.00660409
KICH	readers	SRSF4	YTHDF2	0.533018	4.85e-06
KICH	writers	SRSF4	ZC3H13	0.351663	0.00407176
KICH	readers	SRSF5	FMR1	0.480081	5.19e-05
KICH	writers	SRSF5	METTL14	0.432131	0.000324921
KICH	writers	SRSF5	METTL3	0.645902	6.25e-09
KICH	readers	SRSF5	RBMX	0.373594	0.00217386
KICH	writers	SRSF5	WTAP	-0.264097	0.0335193
KICH	readers	SRSF5	YTHDC1	0.398122	0.00102202
KICH	readers	SRSF5	YTHDC2	0.353354	0.00388532
KICH	readers	SRSF5	YTHDF1	0.339098	0.00572325
KICH	readers	SRSF6	FMR1	0.261155	0.0356181
KICH	erasers	SRSF6	FTO	0.312132	0.0113659
KICH	readers	SRSF6	HNRNPA2B1	0.470528	7.65e-05
KICH	readers	SRSF6	HNRNPC	0.404915	0.000820703
KICH	writers	SRSF6	KIAA1429	0.42381	0.000434921
KICH	writers	SRSF6	METTL14	0.493295	2.98e-05
KICH	writers	SRSF6	METTL16	0.336023	0.00620774
KICH	writers	SRSF6	METTL3	0.447687	0.000184559
KICH	writers	SRSF6	RBM15	0.346506	0.00469005
KICH	readers	SRSF6	RBMX	0.477519	5.76e-05
[truncated: 4,595 more rows]
