# Supplementary material for: Molecular characteristics and clinical implications of serine/arginine-rich splicing factors in human cancer
Source: Aging (Albany NY). 2023 Nov 24;15(22):13287–311. doi: 10.18632/aging.205241 (PMC10713412; doi:10.18632/aging.205241)
Supplement: Supplementary Table 2 [file aging-15-205241-s003.xls]

## Sheet: Table S2
Supplementary Table 2. The association between miRNAs and SRSFs in 33 cancer types.
Cancer types	miRNA	Target genes	cor	pvalue
ACC	hsa-miR-101-3p	SRSF10	-0.228235	0.044454
COAD	hsa-miR-101-3p	SRSF10	0.100858	0.0385885
DLBC	hsa-miR-101-3p	SRSF10	-0.379772	0.00846529
HNSC	hsa-miR-101-3p	SRSF10	0.266997	1.71e-09
KIRC	hsa-miR-101-3p	SRSF10	0.143232	0.00136656
LGG	hsa-miR-101-3p	SRSF10	-0.0939175	0.0317593
LIHC	hsa-miR-101-3p	SRSF10	-0.130375	0.0124272
LUSC	hsa-miR-101-3p	SRSF10	0.113287	0.0146239
OV	hsa-miR-101-3p	SRSF10	0.200839	0.000102514
PAAD	hsa-miR-101-3p	SRSF10	0.181183	0.0158039
STAD	hsa-miR-101-3p	SRSF10	-0.142644	0.00605367
TGCT	hsa-miR-101-3p	SRSF10	0.302674	0.000129219
THCA	hsa-miR-101-3p	SRSF10	0.284816	7.03e-11
BRCA	hsa-miR-122-5p	SRSF10	-0.0635772	0.038218
HNSC	hsa-miR-122-5p	SRSF10	0.190141	2.14e-05
KICH	hsa-miR-122-5p	SRSF10	-0.263211	0.0356064
LIHC	hsa-miR-122-5p	SRSF10	-0.366747	3.98e-13
PCPG	hsa-miR-122-5p	SRSF10	0.180365	0.01483
SARC	hsa-miR-122-5p	SRSF10	0.163301	0.00859047
BLCA	hsa-miR-139-5p	SRSF10	-0.108331	0.0292723
KIRC	hsa-miR-139-5p	SRSF10	0.201797	5.78e-06
KIRP	hsa-miR-139-5p	SRSF10	-0.141701	0.0168698
LGG	hsa-miR-139-5p	SRSF10	-0.265231	7.19e-10
LIHC	hsa-miR-139-5p	SRSF10	-0.242422	2.62e-06
MESO	hsa-miR-139-5p	SRSF10	0.283597	0.00814384
PCPG	hsa-miR-139-5p	SRSF10	0.170139	0.0216617
PRAD	hsa-miR-139-5p	SRSF10	-0.11513	0.0108381
STAD	hsa-miR-139-5p	SRSF10	-0.111974	0.0315227
TGCT	hsa-miR-139-5p	SRSF10	0.325784	3.53e-05
BRCA	hsa-miR-140-3p	SRSF10	-0.0752525	0.0141237
CHOL	hsa-miR-140-3p	SRSF10	0.415728	0.0116809
KIRC	hsa-miR-140-3p	SRSF10	0.123565	0.0058096
KIRP	hsa-miR-140-3p	SRSF10	-0.214665	0.000268206
LGG	hsa-miR-140-3p	SRSF10	-0.218166	4.7e-07
LIHC	hsa-miR-140-3p	SRSF10	0.12907	0.0133405
LUSC	hsa-miR-140-3p	SRSF10	0.149124	0.00127475
PAAD	hsa-miR-140-3p	SRSF10	0.188082	0.0121777
SKCM	hsa-miR-140-3p	SRSF10	0.142913	0.00240191
THYM	hsa-miR-140-3p	SRSF10	0.457822	1.65e-07
UCEC	hsa-miR-140-3p	SRSF10	0.155205	0.000381945
COAD	hsa-miR-144-3p	SRSF10	0.110758	0.0230376
ESCA	hsa-miR-144-3p	SRSF10	-0.177741	0.0245393
KIRP	hsa-miR-144-3p	SRSF10	-0.199716	0.000711797
BLCA	hsa-miR-145-5p	SRSF10	-0.158214	0.00140177
KICH	hsa-miR-145-5p	SRSF10	0.25557	0.0415253
LUAD	hsa-miR-145-5p	SRSF10	-0.103634	0.0199614
LUSC	hsa-miR-145-5p	SRSF10	-0.204402	9.08e-06
OV	hsa-miR-145-5p	SRSF10	-0.194396	0.000171643
PRAD	hsa-miR-145-5p	SRSF10	-0.285902	1.19e-10
SARC	hsa-miR-145-5p	SRSF10	0.143621	0.0210173
SKCM	hsa-miR-145-5p	SRSF10	0.0957531	0.0425626
STAD	hsa-miR-145-5p	SRSF10	-0.332304	5.8e-11
TGCT	hsa-miR-145-5p	SRSF10	-0.420216	5.23e-08
UCEC	hsa-miR-145-5p	SRSF10	-0.109333	0.0126078
DLBC	hsa-miR-153-3p	SRSF10	-0.315401	0.0308108
OV	hsa-miR-153-3p	SRSF10	0.143234	0.00584548
PAAD	hsa-miR-153-3p	SRSF10	-0.194679	0.00941579
PRAD	hsa-miR-153-3p	SRSF10	-0.217099	1.26e-06
TGCT	hsa-miR-153-3p	SRSF10	-0.174073	0.030295
THCA	hsa-miR-153-3p	SRSF10	0.126345	0.00446034
BLCA	hsa-miR-154-5p	SRSF10	0.12737	0.0102934
KICH	hsa-miR-154-5p	SRSF10	0.286546	0.0217014
LGG	hsa-miR-154-5p	SRSF10	-0.103561	0.0178327
PAAD	hsa-miR-154-5p	SRSF10	-0.207514	0.00558041
PRAD	hsa-miR-154-5p	SRSF10	-0.140682	0.00181764
SARC	hsa-miR-154-5p	SRSF10	-0.123482	0.0475503
STAD	hsa-miR-154-5p	SRSF10	-0.191912	0.000208458
THCA	hsa-miR-154-5p	SRSF10	-0.121334	0.00633379
ACC	hsa-miR-186-5p	SRSF10	0.267511	0.0178955
BLCA	hsa-miR-186-5p	SRSF10	0.26868	3.98e-08
BRCA	hsa-miR-186-5p	SRSF10	0.245031	5.35e-16
COAD	hsa-miR-186-5p	SRSF10	0.151171	0.00186808
ESCA	hsa-miR-186-5p	SRSF10	0.378321	8.12e-07
HNSC	hsa-miR-186-5p	SRSF10	0.136657	0.00235903
KICH	hsa-miR-186-5p	SRSF10	0.479232	6.17e-05
KIRP	hsa-miR-186-5p	SRSF10	-0.198121	0.00078678
LGG	hsa-miR-186-5p	SRSF10	0.243703	1.65e-08
LIHC	hsa-miR-186-5p	SRSF10	0.285077	2.72e-08
LUAD	hsa-miR-186-5p	SRSF10	0.139104	0.00174602
LUSC	hsa-miR-186-5p	SRSF10	0.201984	1.16e-05
PCPG	hsa-miR-186-5p	SRSF10	0.178087	0.0161622
PRAD	hsa-miR-186-5p	SRSF10	-0.112571	0.0127428
READ	hsa-miR-186-5p	SRSF10	0.237294	0.00324457
SKCM	hsa-miR-186-5p	SRSF10	0.261093	1.97e-08
STAD	hsa-miR-186-5p	SRSF10	0.289609	1.46e-08
TGCT	hsa-miR-186-5p	SRSF10	-0.265535	0.000839957
THCA	hsa-miR-186-5p	SRSF10	0.123015	0.00563872
THYM	hsa-miR-186-5p	SRSF10	0.347459	0.000108096
CESC	hsa-miR-193a-5p	SRSF10	-0.122409	0.0325946
DLBC	hsa-miR-193a-5p	SRSF10	-0.412465	0.0039635
KICH	hsa-miR-193a-5p	SRSF10	0.321642	0.00955056
PRAD	hsa-miR-193a-5p	SRSF10	0.120725	0.00752703
BRCA	hsa-miR-193b-5p	SRSF10	0.0674312	0.0279192
CESC	hsa-miR-193b-5p	SRSF10	-0.242505	1.85e-05
HNSC	hsa-miR-193b-5p	SRSF10	-0.139374	0.00192287
KIRC	hsa-miR-193b-5p	SRSF10	-0.108228	0.015787
KIRP	hsa-miR-193b-5p	SRSF10	-0.177399	0.00269773
LUSC	hsa-miR-193b-5p	SRSF10	-0.122345	0.0083348
OV	hsa-miR-193b-5p	SRSF10	-0.136507	0.00864913
TGCT	hsa-miR-193b-5p	SRSF10	0.439397	1.07e-08
BLCA	hsa-miR-200a-3p	SRSF10	0.257291	1.52e-07
BRCA	hsa-miR-200a-3p	SRSF10	0.131813	1.62e-05
CESC	hsa-miR-200a-3p	SRSF10	0.293794	1.74e-07
COAD	hsa-miR-200a-3p	SRSF10	0.101787	0.0368231
ESCA	hsa-miR-200a-3p	SRSF10	0.263426	0.000763709
HNSC	hsa-miR-200a-3p	SRSF10	0.270673	1e-09
KIRP	hsa-miR-200a-3p	SRSF10	0.272909	3.04e-06
LIHC	hsa-miR-200a-3p	SRSF10	0.196975	0.00014593
LUSC	hsa-miR-200a-3p	SRSF10	0.40408	1.19e-19
MESO	hsa-miR-200a-3p	SRSF10	0.398203	0.000146429
OV	hsa-miR-200a-3p	SRSF10	0.208779	5.31e-05
STAD	hsa-miR-200a-3p	SRSF10	0.304515	2.34e-09
TGCT	hsa-miR-200a-3p	SRSF10	-0.418937	5.79e-08
THCA	hsa-miR-200a-3p	SRSF10	0.300211	5.61e-12
THYM	hsa-miR-200a-3p	SRSF10	-0.282895	0.00182462
UCEC	hsa-miR-200a-3p	SRSF10	0.105993	0.0156059
UVM	hsa-miR-200a-3p	SRSF10	0.426452	8e-05
CESC	hsa-miR-205-5p	SRSF10	-0.1466	0.0103589
COAD	hsa-miR-205-5p	SRSF10	-0.13439	0.00574852
ESCA	hsa-miR-205-5p	SRSF10	-0.196232	0.012885
HNSC	hsa-miR-205-5p	SRSF10	0.106694	0.0178003
STAD	hsa-miR-205-5p	SRSF10	-0.112399	0.030879
TGCT	hsa-miR-205-5p	SRSF10	-0.185166	0.0210759
THYM	hsa-miR-205-5p	SRSF10	-0.29577	0.00109155
BLCA	hsa-miR-217	SRSF10	0.144269	0.00361868
KIRP	hsa-miR-217	SRSF10	-0.137854	0.0201243
LGG	hsa-miR-217	SRSF10	0.192243	9.54e-06
LUAD	hsa-miR-217	SRSF10	0.111978	0.0118835
PAAD	hsa-miR-217	SRSF10	-0.424887	3.76e-09
STAD	hsa-miR-217	SRSF10	0.112683	0.0304548
BRCA	hsa-miR-218-5p	SRSF10	-0.0689665	0.0245384
CESC	hsa-miR-218-5p	SRSF10	0.124801	0.0293219
COAD	hsa-miR-218-5p	SRSF10	-0.0983916	0.0436201
HNSC	hsa-miR-218-5p	SRSF10	0.0916551	0.0419323
KIRP	hsa-miR-218-5p	SRSF10	0.138504	0.0195393
LGG	hsa-miR-218-5p	SRSF10	-0.201226	3.51e-06
LIHC	hsa-miR-218-5p	SRSF10	0.122142	0.0192477
MESO	hsa-miR-218-5p	SRSF10	0.235308	0.0291876
OV	hsa-miR-218-5p	SRSF10	0.257133	5.53e-07
PCPG	hsa-miR-218-5p	SRSF10	0.200852	0.00655309
PRAD	hsa-miR-218-5p	SRSF10	-0.142456	0.0015873
SKCM	hsa-miR-218-5p	SRSF10	0.126482	0.00728735
STAD	hsa-miR-218-5p	SRSF10	-0.167334	0.00125422
TGCT	hsa-miR-218-5p	SRSF10	-0.241159	0.00250404
THCA	hsa-miR-218-5p	SRSF10	0.195385	9.75e-06
UCEC	hsa-miR-218-5p	SRSF10	0.101807	0.0202324
ACC	hsa-miR-22-3p	SRSF10	-0.297936	0.00806647
BLCA	hsa-miR-22-3p	SRSF10	-0.228353	3.44e-06
BRCA	hsa-miR-22-3p	SRSF10	-0.191703	2.95e-10
CESC	hsa-miR-22-3p	SRSF10	-0.223146	8.47e-05
COAD	hsa-miR-22-3p	SRSF10	-0.160741	0.000933407
DLBC	hsa-miR-22-3p	SRSF10	-0.30472	0.0372862
ESCA	hsa-miR-22-3p	SRSF10	-0.363882	2.25e-06
HNSC	hsa-miR-22-3p	SRSF10	-0.195732	1.2e-05
KICH	hsa-miR-22-3p	SRSF10	-0.267275	0.0327556
KIRC	hsa-miR-22-3p	SRSF10	-0.211328	2e-06
KIRP	hsa-miR-22-3p	SRSF10	-0.407051	9.26e-13
LAML	hsa-miR-22-3p	SRSF10	-0.321109	7.76e-05
LIHC	hsa-miR-22-3p	SRSF10	-0.362764	7.41e-13
LUAD	hsa-miR-22-3p	SRSF10	-0.260053	3.11e-09
LUSC	hsa-miR-22-3p	SRSF10	-0.283722	4.86e-10
SARC	hsa-miR-22-3p	SRSF10	-0.2295	0.000200681
SKCM	hsa-miR-22-3p	SRSF10	-0.265629	1.09e-08
CHOL	hsa-miR-223-3p	SRSF10	0.436255	0.00781683
KICH	hsa-miR-223-3p	SRSF10	0.310292	0.0125838
LIHC	hsa-miR-223-3p	SRSF10	0.232644	6.68e-06
MESO	hsa-miR-223-3p	SRSF10	0.226258	0.0361914
PAAD	hsa-miR-223-3p	SRSF10	0.158828	0.0347278
SARC	hsa-miR-223-3p	SRSF10	-0.160132	0.00998774
THCA	hsa-miR-223-3p	SRSF10	-0.118972	0.00744062
BRCA	hsa-miR-28-3p	SRSF10	0.0835249	0.00643449
HNSC	hsa-miR-28-3p	SRSF10	0.178168	6.96e-05
KICH	hsa-miR-28-3p	SRSF10	0.257712	0.0397891
LGG	hsa-miR-28-3p	SRSF10	0.14037	0.00128898
LIHC	hsa-miR-28-3p	SRSF10	0.203759	8.44e-05
PAAD	hsa-miR-28-3p	SRSF10	0.252751	0.000688564
SKCM	hsa-miR-28-3p	SRSF10	-0.179178	0.000135043
STAD	hsa-miR-28-3p	SRSF10	-0.145652	0.00505729
TGCT	hsa-miR-28-3p	SRSF10	-0.396541	3.26e-07
THCA	hsa-miR-28-3p	SRSF10	-0.107958	0.0152182
THYM	hsa-miR-28-3p	SRSF10	0.361268	5.42e-05
UVM	hsa-miR-28-3p	SRSF10	-0.373573	0.000642025
BLCA	hsa-miR-296-5p	SRSF10	0.158382	0.00138514
COAD	hsa-miR-296-5p	SRSF10	0.110725	0.0230788
LGG	hsa-miR-296-5p	SRSF10	0.18578	1.9e-05
LIHC	hsa-miR-296-5p	SRSF10	0.175685	0.000723571
PAAD	hsa-miR-296-5p	SRSF10	-0.279787	0.000162236
SKCM	hsa-miR-296-5p	SRSF10	0.165156	0.00044142
THCA	hsa-miR-296-5p	SRSF10	0.153043	0.000558405
UVM	hsa-miR-296-5p	SRSF10	-0.232134	0.0382664
BRCA	hsa-miR-29c-3p	SRSF10	-0.0710949	0.0204404
COAD	hsa-miR-29c-3p	SRSF10	-0.116829	0.0164746
DLBC	hsa-miR-29c-3p	SRSF10	-0.333033	0.0221719
ESCA	hsa-miR-29c-3p	SRSF10	-0.164683	0.0374345
HNSC	hsa-miR-29c-3p	SRSF10	0.190261	2.11e-05
KICH	hsa-miR-29c-3p	SRSF10	-0.303448	0.0147888
KIRC	hsa-miR-29c-3p	SRSF10	-0.098453	0.0281873
KIRP	hsa-miR-29c-3p	SRSF10	-0.125572	0.0344105
LGG	hsa-miR-29c-3p	SRSF10	-0.26062	1.44e-09
LIHC	hsa-miR-29c-3p	SRSF10	-0.166186	0.00139805
OV	hsa-miR-29c-3p	SRSF10	0.154896	0.00285086
PAAD	hsa-miR-29c-3p	SRSF10	-0.165698	0.027517
PRAD	hsa-miR-29c-3p	SRSF10	-0.140971	0.00177812
STAD	hsa-miR-29c-3p	SRSF10	-0.140119	0.00702262
TGCT	hsa-miR-29c-3p	SRSF10	0.158858	0.0483464
THCA	hsa-miR-29c-3p	SRSF10	0.175811	7.13e-05
UCEC	hsa-miR-29c-3p	SRSF10	-0.101038	0.0212011
BRCA	hsa-miR-31-5p	SRSF10	0.137799	6.51e-06
CESC	hsa-miR-31-5p	SRSF10	-0.117729	0.0399027
ESCA	hsa-miR-31-5p	SRSF10	-0.262844	0.000785309
HNSC	hsa-miR-31-5p	SRSF10	-0.125299	0.00533607
LIHC	hsa-miR-31-5p	SRSF10	0.244881	2.06e-06
MESO	hsa-miR-31-5p	SRSF10	0.253708	0.0184197
TGCT	hsa-miR-31-5p	SRSF10	0.222734	0.00534211
THCA	hsa-miR-31-5p	SRSF10	0.103056	0.02054
ACC	hsa-miR-32-3p	SRSF10	0.284056	0.0117235
BLCA	hsa-miR-32-3p	SRSF10	0.199126	5.45e-05
BRCA	hsa-miR-32-3p	SRSF10	0.100888	0.000988262
COAD	hsa-miR-32-3p	SRSF10	0.102023	0.0363871
ESCA	hsa-miR-32-3p	SRSF10	0.165184	0.0368516
HNSC	hsa-miR-32-3p	SRSF10	0.250159	1.8e-08
LGG	hsa-miR-32-3p	SRSF10	0.251998	5.1e-09
LIHC	hsa-miR-32-3p	SRSF10	0.190542	0.000241138
LUAD	hsa-miR-32-3p	SRSF10	0.101288	0.0229594
LUSC	hsa-miR-32-3p	SRSF10	0.161961	0.000460922
OV	hsa-miR-32-3p	SRSF10	0.166427	0.00133418
STAD	hsa-miR-32-3p	SRSF10	0.197449	0.000134732
TGCT	hsa-miR-32-3p	SRSF10	0.388439	5.9e-07
THCA	hsa-miR-32-3p	SRSF10	0.136766	0.00206789
THYM	hsa-miR-32-3p	SRSF10	0.389156	1.22e-05
UVM	hsa-miR-32-3p	SRSF10	0.261845	0.0189635
BLCA	hsa-miR-330-3p	SRSF10	0.124495	0.0121615
BRCA	hsa-miR-330-3p	SRSF10	0.0899363	0.00333814
DLBC	hsa-miR-330-3p	SRSF10	-0.465821	0.000967751
ESCA	hsa-miR-330-3p	SRSF10	0.187836	0.0173815
LGG	hsa-miR-330-3p	SRSF10	-0.205922	2.04e-06
LIHC	hsa-miR-330-3p	SRSF10	0.179661	0.000543686
PRAD	hsa-miR-330-3p	SRSF10	0.173266	0.000117712
STAD	hsa-miR-330-3p	SRSF10	0.144585	0.00539257
ACC	hsa-miR-335-5p	SRSF10	0.231748	0.0411927
DLBC	hsa-miR-335-5p	SRSF10	-0.33165	0.0227663
ESCA	hsa-miR-335-5p	SRSF10	0.289816	0.000201388
LGG	hsa-miR-335-5p	SRSF10	0.100678	0.0212918
LIHC	hsa-miR-335-5p	SRSF10	0.116767	0.0252895
MESO	hsa-miR-335-5p	SRSF10	0.214251	0.0476056
OV	hsa-miR-335-5p	SRSF10	0.155475	0.00274733
READ	hsa-miR-335-5p	SRSF10	0.171486	0.034649
SARC	hsa-miR-335-5p	SRSF10	0.147285	0.0179237
SKCM	hsa-miR-335-5p	SRSF10	0.145209	0.00203747
TGCT	hsa-miR-335-5p	SRSF10	-0.390653	5.02e-07
UCEC	hsa-miR-335-5p	SRSF10	-0.149465	0.000627732
COAD	hsa-miR-346	SRSF10	0.18189	0.000175205
LGG	hsa-miR-346	SRSF10	-0.249001	7.83e-09
PCPG	hsa-miR-346	SRSF10	0.159939	0.0310269
PRAD	hsa-miR-346	SRSF10	-0.0980693	0.0301345
READ	hsa-miR-346	SRSF10	0.247484	0.00211238
TGCT	hsa-miR-346	SRSF10	-0.213084	0.00776686
THCA	hsa-miR-346	SRSF10	0.0876683	0.0489519
UVM	hsa-miR-346	SRSF10	0.376798	0.000570963
CHOL	hsa-miR-34b-3p	SRSF10	-0.362835	0.0296374
KICH	hsa-miR-34b-3p	SRSF10	0.283475	0.0232147
READ	hsa-miR-34b-3p	SRSF10	0.178166	0.0280888
CHOL	hsa-miR-34c-3p	SRSF10	-0.385122	0.0203704
COAD	hsa-miR-34c-3p	SRSF10	-0.10734	0.0276476
KICH	hsa-miR-34c-3p	SRSF10	0.340115	0.00596334
LIHC	hsa-miR-34c-3p	SRSF10	0.128501	0.0137567
BLCA	hsa-miR-369-3p	SRSF10	0.165612	0.000820728
BRCA	hsa-miR-369-3p	SRSF10	-0.114969	0.000172337
KICH	hsa-miR-369-3p	SRSF10	0.312224	0.0120152
LIHC	hsa-miR-369-3p	SRSF10	0.115452	0.0269949
LUAD	hsa-miR-369-3p	SRSF10	0.109093	0.0142709
LUSC	hsa-miR-369-3p	SRSF10	0.0972556	0.0362363
PAAD	hsa-miR-369-3p	SRSF10	-0.188143	0.012149
PRAD	hsa-miR-369-3p	SRSF10	-0.0893944	0.048188
READ	hsa-miR-369-3p	SRSF10	-0.251556	0.00177071
THCA	hsa-miR-369-3p	SRSF10	-0.162788	0.000239083
BLCA	hsa-miR-374b-5p	SRSF10	0.148808	0.00268047
HNSC	hsa-miR-374b-5p	SRSF10	0.157657	0.000441954
KIRP	hsa-miR-374b-5p	SRSF10	-0.30049	2.45e-07
LUSC	hsa-miR-374b-5p	SRSF10	0.134131	0.00379679
OV	hsa-miR-374b-5p	SRSF10	0.199171	0.000117337
PRAD	hsa-miR-374b-5p	SRSF10	-0.245943	3.6e-08
TGCT	hsa-miR-374b-5p	SRSF10	0.294451	0.000200005
UCEC	hsa-miR-374b-5p	SRSF10	-0.0999828	0.0225966
BLCA	hsa-miR-375	SRSF10	0.222432	6.21e-06
CESC	hsa-miR-375	SRSF10	0.201624	0.000395283
ESCA	hsa-miR-375	SRSF10	0.207962	0.00831942
LUSC	hsa-miR-375	SRSF10	0.174449	0.000158974
PAAD	hsa-miR-375	SRSF10	-0.216957	0.0037245
TGCT	hsa-miR-375	SRSF10	-0.267851	0.000753006
BRCA	hsa-miR-381-3p	SRSF10	-0.139544	4.96e-06
CESC	hsa-miR-381-3p	SRSF10	0.115039	0.044697
KICH	hsa-miR-381-3p	SRSF10	0.303839	0.0146541
KIRC	hsa-miR-381-3p	SRSF10	0.0929582	0.0382996
LGG	hsa-miR-381-3p	SRSF10	-0.124004	0.00451064
LIHC	hsa-miR-381-3p	SRSF10	0.116515	0.0256085
LUSC	hsa-miR-381-3p	SRSF10	0.119392	0.0100514
PAAD	hsa-miR-381-3p	SRSF10	-0.177832	0.0178825
READ	hsa-miR-381-3p	SRSF10	-0.185575	0.0220823
TGCT	hsa-miR-381-3p	SRSF10	0.447108	5.47e-09
BLCA	hsa-miR-382-3p	SRSF10	0.159548	0.00127482
BRCA	hsa-miR-382-3p	SRSF10	-0.165993	5.23e-08
KICH	hsa-miR-382-3p	SRSF10	0.27026	0.0307857
LGG	hsa-miR-382-3p	SRSF10	-0.0987033	0.0239844
LUAD	hsa-miR-382-3p	SRSF10	0.115504	0.00945068
LUSC	hsa-miR-382-3p	SRSF10	0.125593	0.0067527
OV	hsa-miR-382-3p	SRSF10	0.108197	0.037761
PAAD	hsa-miR-382-3p	SRSF10	-0.196327	0.00881913
PRAD	hsa-miR-382-3p	SRSF10	-0.0889803	0.0492388
THCA	hsa-miR-382-3p	SRSF10	-0.15206	0.000606653
BLCA	hsa-miR-409-3p	SRSF10	0.129554	0.00904953
KICH	hsa-miR-409-3p	SRSF10	0.322087	0.00944611
KIRP	hsa-miR-409-3p	SRSF10	-0.132882	0.0251275
LUSC	hsa-miR-409-3p	SRSF10	0.10601	0.0223825
PAAD	hsa-miR-409-3p	SRSF10	-0.160852	0.0324531
PCPG	hsa-miR-409-3p	SRSF10	0.188975	0.0106214
THCA	hsa-miR-409-3p	SRSF10	-0.137842	0.00190425
BLCA	hsa-miR-410-3p	SRSF10	0.172407	0.000492061
BRCA	hsa-miR-410-3p	SRSF10	-0.140516	4.25e-06
COAD	hsa-miR-410-3p	SRSF10	-0.129628	0.00774266
LGG	hsa-miR-410-3p	SRSF10	-0.202249	3.12e-06
LUAD	hsa-miR-410-3p	SRSF10	0.165583	0.00018854
LUSC	hsa-miR-410-3p	SRSF10	0.136543	0.00320759
PAAD	hsa-miR-410-3p	SRSF10	-0.163079	0.0300983
TGCT	hsa-miR-410-3p	SRSF10	-0.253355	0.0014688
THCA	hsa-miR-410-3p	SRSF10	-0.135361	0.00230099
BLCA	hsa-miR-411-5p	SRSF10	0.158306	0.00139266
BRCA	hsa-miR-411-5p	SRSF10	-0.12588	3.86e-05
COAD	hsa-miR-411-5p	SRSF10	-0.112485	0.0209736
HNSC	hsa-miR-411-5p	SRSF10	-0.119179	0.00807476
KICH	hsa-miR-411-5p	SRSF10	0.293741	0.018481
LGG	hsa-miR-411-5p	SRSF10	-0.13668	0.00173032
OV	hsa-miR-411-5p	SRSF10	0.114194	0.0282834
THCA	hsa-miR-411-5p	SRSF10	-0.154159	0.000507974
ACC	hsa-miR-421	SRSF10	0.351086	0.00162372
BLCA	hsa-miR-421	SRSF10	0.25354	2.32e-07
BRCA	hsa-miR-421	SRSF10	0.0674587	0.0278551
CHOL	hsa-miR-421	SRSF10	0.39002	0.0186972
COAD	hsa-miR-421	SRSF10	0.113418	0.0199254
ESCA	hsa-miR-421	SRSF10	0.235161	0.00275938
KIRP	hsa-miR-421	SRSF10	-0.219794	0.000188875
LIHC	hsa-miR-421	SRSF10	0.194868	0.000172321
LUAD	hsa-miR-421	SRSF10	0.20074	5.58e-06
LUSC	hsa-miR-421	SRSF10	0.224622	1.02e-06
OV	hsa-miR-421	SRSF10	0.212167	3.98e-05
READ	hsa-miR-421	SRSF10	0.225004	0.00532032
SARC	hsa-miR-421	SRSF10	0.149848	0.0160032
STAD	hsa-miR-421	SRSF10	0.25192	9.48e-07
TGCT	hsa-miR-421	SRSF10	-0.178823	0.0259952
THYM	hsa-miR-421	SRSF10	0.230098	0.0118207
UCEC	hsa-miR-421	SRSF10	0.107506	0.0141776
ACC	hsa-miR-483-5p	SRSF10	0.375086	0.000715359
LGG	hsa-miR-483-5p	SRSF10	0.183931	2.31e-05
LUAD	hsa-miR-483-5p	SRSF10	0.127609	0.0041121
STAD	hsa-miR-483-5p	SRSF10	0.145799	0.00501285
TGCT	hsa-miR-483-5p	SRSF10	-0.200232	0.0124884
BLCA	hsa-miR-484	SRSF10	0.168071	0.00068354
BRCA	hsa-miR-484	SRSF10	0.171874	1.71e-08
ESCA	hsa-miR-484	SRSF10	0.24424	0.00185526
LAML	hsa-miR-484	SRSF10	-0.171519	0.0384505
LIHC	hsa-miR-484	SRSF10	0.199365	0.000120592
LUSC	hsa-miR-484	SRSF10	0.103123	0.0263333
SKCM	hsa-miR-484	SRSF10	0.177366	0.000158199
STAD	hsa-miR-484	SRSF10	0.167913	0.00120549
TGCT	hsa-miR-484	SRSF10	0.252157	0.0015496
THCA	hsa-miR-484	SRSF10	0.0950101	0.0327915
BLCA	hsa-miR-485-3p	SRSF10	0.104291	0.0359011
KICH	hsa-miR-485-3p	SRSF10	0.284332	0.0227834
LGG	hsa-miR-485-3p	SRSF10	-0.195662	6.56e-06
LUSC	hsa-miR-485-3p	SRSF10	0.160021	0.000540198
PAAD	hsa-miR-485-3p	SRSF10	-0.190446	0.0111154
PCPG	hsa-miR-485-3p	SRSF10	0.14857	0.0453249
READ	hsa-miR-485-3p	SRSF10	-0.178526	0.0277677
TGCT	hsa-miR-485-3p	SRSF10	0.331736	2.48e-05
THCA	hsa-miR-485-3p	SRSF10	-0.115593	0.00932485
BLCA	hsa-miR-493-5p	SRSF10	0.153962	0.00188737
COAD	hsa-miR-493-5p	SRSF10	-0.132213	0.00659439
KICH	hsa-miR-493-5p	SRSF10	0.318898	0.0102188
LGG	hsa-miR-493-5p	SRSF10	0.144794	0.000897221
LUSC	hsa-miR-493-5p	SRSF10	0.108277	0.0196517
PCPG	hsa-miR-493-5p	SRSF10	0.156058	0.0354009
THCA	hsa-miR-493-5p	SRSF10	-0.137598	0.00194023
BLCA	hsa-miR-495-3p	SRSF10	0.139221	0.00500374
KICH	hsa-miR-495-3p	SRSF10	0.337197	0.00643592
LGG	hsa-miR-495-3p	SRSF10	-0.190489	1.15e-05
LIHC	hsa-miR-495-3p	SRSF10	0.131159	0.0119048
LUSC	hsa-miR-495-3p	SRSF10	0.134047	0.00381896
PAAD	hsa-miR-495-3p	SRSF10	-0.167709	0.0256648
SKCM	hsa-miR-495-3p	SRSF10	0.126144	0.00744651
THCA	hsa-miR-495-3p	SRSF10	-0.0970205	0.0292569
BLCA	hsa-miR-500a-5p	SRSF10	0.151069	0.00230121
CHOL	hsa-miR-500a-5p	SRSF10	0.399823	0.0156917
COAD	hsa-miR-500a-5p	SRSF10	0.102806	0.0349686
ESCA	hsa-miR-500a-5p	SRSF10	0.237637	0.00247976
KIRC	hsa-miR-500a-5p	SRSF10	0.112528	0.0120625
KIRP	hsa-miR-500a-5p	SRSF10	-0.172197	0.00360406
LGG	hsa-miR-500a-5p	SRSF10	0.111589	0.0106546
LUSC	hsa-miR-500a-5p	SRSF10	0.146952	0.00150272
PRAD	hsa-miR-500a-5p	SRSF10	-0.182559	4.89e-05
READ	hsa-miR-500a-5p	SRSF10	0.190884	0.01849
SARC	hsa-miR-500a-5p	SRSF10	0.131588	0.0346395
SKCM	hsa-miR-500a-5p	SRSF10	0.131569	0.00523388
STAD	hsa-miR-500a-5p	SRSF10	0.166331	0.00134294
TGCT	hsa-miR-500a-5p	SRSF10	-0.345906	1.04e-05
UCEC	hsa-miR-500a-5p	SRSF10	0.114414	0.00901906
BLCA	hsa-miR-501-5p	SRSF10	0.175389	0.000390743
CHOL	hsa-miR-501-5p	SRSF10	0.546784	0.000559525
ESCA	hsa-miR-501-5p	SRSF10	0.216436	0.00597932
KIRP	hsa-miR-501-5p	SRSF10	-0.138029	0.0199651
LAML	hsa-miR-501-5p	SRSF10	-0.195114	0.0182733
LGG	hsa-miR-501-5p	SRSF10	0.137377	0.00163754
LUAD	hsa-miR-501-5p	SRSF10	0.0882697	0.0476365
LUSC	hsa-miR-501-5p	SRSF10	0.202195	1.14e-05
MESO	hsa-miR-501-5p	SRSF10	0.233383	0.0305721
PRAD	hsa-miR-501-5p	SRSF10	-0.112526	0.0127794
SARC	hsa-miR-501-5p	SRSF10	0.146051	0.0189185
STAD	hsa-miR-501-5p	SRSF10	0.153285	0.00315738
TGCT	hsa-miR-501-5p	SRSF10	-0.25981	0.00109589
UCEC	hsa-miR-501-5p	SRSF10	0.165437	0.000150879
BRCA	hsa-miR-503-5p	SRSF10	0.133159	1.33e-05
ESCA	hsa-miR-503-5p	SRSF10	0.239832	0.00225371
KICH	hsa-miR-503-5p	SRSF10	0.267183	0.0328181
LGG	hsa-miR-503-5p	SRSF10	0.363986	7.91e-18
LIHC	hsa-miR-503-5p	SRSF10	0.292584	1.12e-08
LUAD	hsa-miR-503-5p	SRSF10	0.128166	0.00395059
OV	hsa-miR-503-5p	SRSF10	0.136486	0.00865968
SKCM	hsa-miR-503-5p	SRSF10	0.322841	2.38e-12
STAD	hsa-miR-503-5p	SRSF10	0.136856	0.0084786
TGCT	hsa-miR-503-5p	SRSF10	-0.376449	1.38e-06
THCA	hsa-miR-503-5p	SRSF10	0.101302	0.0228048
THYM	hsa-miR-503-5p	SRSF10	0.293841	0.00118066
UVM	hsa-miR-503-5p	SRSF10	0.399485	0.000241637
BLCA	hsa-miR-539-3p	SRSF10	0.145634	0.00330926
BRCA	hsa-miR-539-3p	SRSF10	-0.0714542	0.019811
KICH	hsa-miR-539-3p	SRSF10	0.288644	0.0207165
KIRC	hsa-miR-539-3p	SRSF10	0.0886327	0.0482856
KIRP	hsa-miR-539-3p	SRSF10	-0.116472	0.0498978
LGG	hsa-miR-539-3p	SRSF10	-0.217565	5.06e-07
LUAD	hsa-miR-539-3p	SRSF10	0.0985322	0.0269711
LUSC	hsa-miR-539-3p	SRSF10	0.136912	0.00312524
PAAD	hsa-miR-539-3p	SRSF10	-0.174968	0.0198433
TGCT	hsa-miR-539-3p	SRSF10	0.227792	0.00436362
BLCA	hsa-miR-543	SRSF10	0.119365	0.0162457
BRCA	hsa-miR-543	SRSF10	-0.0691894	0.0240782
KICH	hsa-miR-543	SRSF10	0.302657	0.0150639
KIRP	hsa-miR-543	SRSF10	-0.118998	0.0451048
LGG	hsa-miR-543	SRSF10	-0.167303	0.000121019
LIHC	hsa-miR-543	SRSF10	0.132358	0.0111442
LUAD	hsa-miR-543	SRSF10	0.125965	0.00462322
LUSC	hsa-miR-543	SRSF10	0.154274	0.000855491
PCPG	hsa-miR-543	SRSF10	0.164221	0.0267424
SKCM	hsa-miR-543	SRSF10	0.100206	0.0337737
BRCA	hsa-miR-582-5p	SRSF10	0.0810572	0.00819315
CHOL	hsa-miR-582-5p	SRSF10	0.399414	0.0158084
HNSC	hsa-miR-582-5p	SRSF10	0.298266	1.38e-11
KIRC	hsa-miR-582-5p	SRSF10	-0.0932994	0.0375926
LGG	hsa-miR-582-5p	SRSF10	-0.200489	3.82e-06
LIHC	hsa-miR-582-5p	SRSF10	0.210409	4.85e-05
OV	hsa-miR-582-5p	SRSF10	0.192361	0.000201311
PRAD	hsa-miR-582-5p	SRSF10	-0.110151	0.0148103
SKCM	hsa-miR-582-5p	SRSF10	-0.160873	0.00062244
STAD	hsa-miR-582-5p	SRSF10	0.11268	0.0304599
TGCT	hsa-miR-582-5p	SRSF10	-0.429669	2.42e-08
ACC	hsa-miR-653-5p	SRSF10	-0.385196	0.000496862
CHOL	hsa-miR-653-5p	SRSF10	0.579226	0.00021437
ESCA	hsa-miR-653-5p	SRSF10	0.2232	0.00455361
KIRP	hsa-miR-653-5p	SRSF10	0.206928	0.000448284
LAML	hsa-miR-653-5p	SRSF10	-0.220408	0.00751173
LGG	hsa-miR-653-5p	SRSF10	0.109546	0.0121834
LIHC	hsa-miR-653-5p	SRSF10	0.183401	0.000413256
OV	hsa-miR-653-5p	SRSF10	0.205517	6.98e-05
PRAD	hsa-miR-653-5p	SRSF10	0.111906	0.0132837
STAD	hsa-miR-653-5p	SRSF10	0.123414	0.0177046
UVM	hsa-miR-653-5p	SRSF10	0.423551	9.05e-05
BLCA	hsa-miR-670-3p	SRSF10	0.109701	0.0272766
ESCA	hsa-miR-670-3p	SRSF10	0.168152	0.0335486
PAAD	hsa-miR-670-3p	SRSF10	-0.19992	0.00763244
TGCT	hsa-miR-670-3p	SRSF10	-0.187663	0.0193723
THYM	hsa-miR-670-3p	SRSF10	-0.18738	0.0412897
BLCA	hsa-miR-758-3p	SRSF10	0.165537	0.000825301
BRCA	hsa-miR-758-3p	SRSF10	-0.155338	3.59e-07
COAD	hsa-miR-758-3p	SRSF10	-0.11865	0.0148559
KICH	hsa-miR-758-3p	SRSF10	0.280032	0.0250167
LGG	hsa-miR-758-3p	SRSF10	-0.123239	0.00476658
LIHC	hsa-miR-758-3p	SRSF10	0.106319	0.0417902
LUSC	hsa-miR-758-3p	SRSF10	0.13091	0.0047364
PAAD	hsa-miR-758-3p	SRSF10	-0.176471	0.018792
PCPG	hsa-miR-758-3p	SRSF10	0.156079	0.0353762
READ	hsa-miR-758-3p	SRSF10	-0.205686	0.0110166
SKCM	hsa-miR-758-3p	SRSF10	0.122635	0.00929056
THCA	hsa-miR-758-3p	SRSF10	-0.143003	0.00127209
ACC	hsa-miR-9-5p	SRSF10	0.272391	0.0158366
BLCA	hsa-miR-9-5p	SRSF10	0.247818	4.4e-07
BRCA	hsa-miR-9-5p	SRSF10	0.161229	1.26e-07
ESCA	hsa-miR-9-5p	SRSF10	0.171423	0.0302033
HNSC	hsa-miR-9-5p	SRSF10	0.30836	2.55e-12
LGG	hsa-miR-9-5p	SRSF10	-0.120638	0.00573816
LUSC	hsa-miR-9-5p	SRSF10	0.253799	2.97e-08
OV	hsa-miR-9-5p	SRSF10	0.133197	0.0104259
SARC	hsa-miR-9-5p	SRSF10	0.127401	0.0408779
SKCM	hsa-miR-9-5p	SRSF10	0.102595	0.029733
STAD	hsa-miR-9-5p	SRSF10	0.115764	0.0261688
THYM	hsa-miR-9-5p	SRSF10	-0.222758	0.0148904
UCEC	hsa-miR-9-5p	SRSF10	0.11628	0.00794911
BRCA	hsa-miR-127-5p	SRSF11	-0.108682	0.000385528
KICH	hsa-miR-127-5p	SRSF11	0.305296	0.0141629
KIRP	hsa-miR-127-5p	SRSF11	-0.197493	0.000818238
LGG	hsa-miR-127-5p	SRSF11	-0.099577	0.0227588
STAD	hsa-miR-127-5p	SRSF11	-0.226591	1.11e-05
TGCT	hsa-miR-127-5p	SRSF11	0.191023	0.0172688
BLCA	hsa-miR-143-3p	SRSF11	-0.184655	0.00018637
COAD	hsa-miR-143-3p	SRSF11	-0.131773	0.00677849
HNSC	hsa-miR-143-3p	SRSF11	-0.13574	0.00252564
KIRP	hsa-miR-143-3p	SRSF11	-0.159609	0.00703425
LGG	hsa-miR-143-3p	SRSF11	-0.112375	0.0101132
LUAD	hsa-miR-143-3p	SRSF11	-0.150943	0.000674502
LUSC	hsa-miR-143-3p	SRSF11	-0.228624	6.44e-07
OV	hsa-miR-143-3p	SRSF11	0.102904	0.0482389
PRAD	hsa-miR-143-3p	SRSF11	-0.195888	1.28e-05
SARC	hsa-miR-143-3p	SRSF11	0.173018	0.00532584
SKCM	hsa-miR-143-3p	SRSF11	-0.240921	2.38e-07
STAD	hsa-miR-143-3p	SRSF11	-0.293914	8.7e-09
THCA	hsa-miR-143-3p	SRSF11	-0.162636	0.000242356
BRCA	hsa-miR-181b-3p	SRSF11	-0.110893	0.000291817
COAD	hsa-miR-181b-3p	SRSF11	0.161914	0.000855025
ESCA	hsa-miR-181b-3p	SRSF11	-0.182483	0.0209119
KICH	hsa-miR-181b-3p	SRSF11	0.281205	0.0243898
KIRC	hsa-miR-181b-3p	SRSF11	0.0935165	0.0371484
KIRP	hsa-miR-181b-3p	SRSF11	-0.244342	3.14e-05
LIHC	hsa-miR-181b-3p	SRSF11	0.12441	0.0171028
LUSC	hsa-miR-181b-3p	SRSF11	-0.206972	6.96e-06
OV	hsa-miR-181b-3p	SRSF11	0.165449	0.00142567
PRAD	hsa-miR-181b-3p	SRSF11	0.135309	0.00271514
SKCM	hsa-miR-181b-3p	SRSF11	0.213008	5.28e-06
TGCT	hsa-miR-181b-3p	SRSF11	0.25077	0.00164826
BLCA	hsa-miR-183-5p	SRSF11	0.143321	0.00384883
HNSC	hsa-miR-183-5p	SRSF11	0.105356	0.0192912
KICH	hsa-miR-183-5p	SRSF11	-0.340973	0.00583035
KIRC	hsa-miR-183-5p	SRSF11	-0.224911	4.05e-07
LIHC	hsa-miR-183-5p	SRSF11	0.214967	3.28e-05
OV	hsa-miR-183-5p	SRSF11	0.107382	0.0392351
PRAD	hsa-miR-183-5p	SRSF11	0.15764	0.000467124
THCA	hsa-miR-183-5p	SRSF11	-0.160937	0.000281957
UCEC	hsa-miR-183-5p	SRSF11	-0.125747	0.00407897
HNSC	hsa-miR-217	SRSF11	0.0976398	0.0301866
KIRP	hsa-miR-217	SRSF11	-0.153275	0.00968293
PAAD	hsa-miR-217	SRSF11	-0.372245	3.36e-07
STAD	hsa-miR-217	SRSF11	0.117578	0.0238978
THCA	hsa-miR-217	SRSF11	0.122492	0.00584708
BRCA	hsa-miR-376a-5p	SRSF11	-0.075904	0.0133083
KICH	hsa-miR-376a-5p	SRSF11	0.284606	0.0226472
KIRP	hsa-miR-376a-5p	SRSF11	-0.17916	0.00244145
PRAD	hsa-miR-376a-5p	SRSF11	-0.106618	0.018355
SKCM	hsa-miR-376a-5p	SRSF11	0.112907	0.0166905
STAD	hsa-miR-376a-5p	SRSF11	-0.162082	0.00178653
TGCT	hsa-miR-376a-5p	SRSF11	0.172978	0.0313674
THCA	hsa-miR-376a-5p	SRSF11	-0.134597	0.00243749
BLCA	hsa-miR-425-5p	SRSF11	0.155302	0.00171988
BRCA	hsa-miR-425-5p	SRSF11	-0.146032	1.74e-06
ESCA	hsa-miR-425-5p	SRSF11	0.213106	0.00681767
KIRC	hsa-miR-425-5p	SRSF11	-0.11905	0.00788846
LIHC	hsa-miR-425-5p	SRSF11	0.11575	0.0265993
LUSC	hsa-miR-425-5p	SRSF11	0.171097	0.000213112
OV	hsa-miR-425-5p	SRSF11	0.153714	0.00307303
PCPG	hsa-miR-425-5p	SRSF11	-0.158946	0.0320997
SKCM	hsa-miR-425-5p	SRSF11	0.115506	0.0143287
STAD	hsa-miR-425-5p	SRSF11	0.19998	0.00010991
BRCA	hsa-miR-493-3p	SRSF11	-0.0791573	0.00982767
COAD	hsa-miR-493-3p	SRSF11	-0.118233	0.0152136
KICH	hsa-miR-493-3p	SRSF11	0.295422	0.0177902
LUSC	hsa-miR-493-3p	SRSF11	0.132136	0.00435643
BRCA	hsa-miR-493-5p	SRSF11	-0.0821295	0.007382
COAD	hsa-miR-493-5p	SRSF11	-0.132344	0.00654051
KICH	hsa-miR-493-5p	SRSF11	0.311872	0.0121171
LUSC	hsa-miR-493-5p	SRSF11	0.0996968	0.0317857
PCPG	hsa-miR-493-5p	SRSF11	0.167644	0.0236919
BLCA	hsa-miR-505-3p	SRSF11	0.151197	0.00228128
COAD	hsa-miR-505-3p	SRSF11	0.0962464	0.0484359
DLBC	hsa-miR-505-3p	SRSF11	-0.345321	0.0174402
ESCA	hsa-miR-505-3p	SRSF11	0.187754	0.0174313
HNSC	hsa-miR-505-3p	SRSF11	0.107071	0.0173988
KICH	hsa-miR-505-3p	SRSF11	0.37629	0.00218053
KIRP	hsa-miR-505-3p	SRSF11	-0.217979	0.000214021
LGG	hsa-miR-505-3p	SRSF11	0.25479	3.41e-09
PRAD	hsa-miR-505-3p	SRSF11	-0.122994	0.00646531
READ	hsa-miR-505-3p	SRSF11	-0.194599	0.0162884
SKCM	hsa-miR-505-3p	SRSF11	0.123334	0.00889357
TGCT	hsa-miR-505-3p	SRSF11	0.192894	0.0161855
THCA	hsa-miR-505-3p	SRSF11	-0.0928069	0.0370775
UCEC	hsa-miR-505-3p	SRSF11	-0.111489	0.0109545
UCS	hsa-miR-505-3p	SRSF11	-0.268683	0.0473138
LAML	hsa-miR-509-3-5p	SRSF11	0.252942	0.00206801
PAAD	hsa-miR-509-3-5p	SRSF11	0.149131	0.0475809
PCPG	hsa-miR-509-3-5p	SRSF11	-0.204394	0.00564523
PRAD	hsa-miR-509-3-5p	SRSF11	-0.170722	0.000148566
READ	hsa-miR-509-3-5p	SRSF11	0.161597	0.0467066
BLCA	hsa-miR-6806-3p	SRSF11	0.237854	1.29e-06
COAD	hsa-miR-6806-3p	SRSF11	0.13064	0.00727381
DLBC	hsa-miR-6806-3p	SRSF11	-0.314494	0.0313213
KIRC	hsa-miR-6806-3p	SRSF11	-0.10574	0.0183741
PRAD	hsa-miR-6806-3p	SRSF11	0.11695	0.00964146
READ	hsa-miR-6806-3p	SRSF11	0.167123	0.0395985
SKCM	hsa-miR-6806-3p	SRSF11	-0.120356	0.0106959
STAD	hsa-miR-6806-3p	SRSF11	0.105457	0.042915
TGCT	hsa-miR-6806-3p	SRSF11	0.236107	0.00309993
THYM	hsa-miR-6806-3p	SRSF11	-0.193697	0.0347964
UVM	hsa-miR-6806-3p	SRSF11	-0.241606	0.0308441
BLCA	hsa-miR-106a-5p	SRSF2	0.302679	5e-10
BRCA	hsa-miR-106a-5p	SRSF2	0.213328	2.09e-12
CESC	hsa-miR-106a-5p	SRSF2	0.261338	3.73e-06
COAD	hsa-miR-106a-5p	SRSF2	0.262193	4.77e-08
DLBC	hsa-miR-106a-5p	SRSF2	0.558663	4.48e-05
ESCA	hsa-miR-106a-5p	SRSF2	0.18984	0.0161996
HNSC	hsa-miR-106a-5p	SRSF2	0.238619	8.21e-08
KIRC	hsa-miR-106a-5p	SRSF2	0.180084	5.4e-05
LIHC	hsa-miR-106a-5p	SRSF2	0.254009	8.2e-07
LUAD	hsa-miR-106a-5p	SRSF2	0.287794	4.56e-11
LUSC	hsa-miR-106a-5p	SRSF2	0.296735	6.93e-11
PRAD	hsa-miR-106a-5p	SRSF2	0.164827	0.0002516
SARC	hsa-miR-106a-5p	SRSF2	0.146172	0.0188185
SKCM	hsa-miR-106a-5p	SRSF2	0.216757	3.56e-06
STAD	hsa-miR-106a-5p	SRSF2	0.371663	1.57e-13
THYM	hsa-miR-106a-5p	SRSF2	0.604316	3.42e-13
ACC	hsa-miR-106b-5p	SRSF2	0.371974	0.000798426
BLCA	hsa-miR-106b-5p	SRSF2	0.404448	2.27e-17
BRCA	hsa-miR-106b-5p	SRSF2	0.403668	6.32e-43
CESC	hsa-miR-106b-5p	SRSF2	0.144041	0.0117892
CHOL	hsa-miR-106b-5p	SRSF2	0.638928	2.74e-05
COAD	hsa-miR-106b-5p	SRSF2	0.284035	2.97e-09
ESCA	hsa-miR-106b-5p	SRSF2	0.386971	4.31e-07
HNSC	hsa-miR-106b-5p	SRSF2	0.29969	1.09e-11
KICH	hsa-miR-106b-5p	SRSF2	0.266756	0.0331084
KIRC	hsa-miR-106b-5p	SRSF2	0.182873	4.11e-05
KIRP	hsa-miR-106b-5p	SRSF2	0.249279	2.14e-05
LGG	hsa-miR-106b-5p	SRSF2	0.26665	5.79e-10
LIHC	hsa-miR-106b-5p	SRSF2	0.461423	9.47e-21
LUAD	hsa-miR-106b-5p	SRSF2	0.28254	1.05e-10
LUSC	hsa-miR-106b-5p	SRSF2	0.398726	3.92e-19
PAAD	hsa-miR-106b-5p	SRSF2	0.244283	0.00105014
PRAD	hsa-miR-106b-5p	SRSF2	0.246484	3.35e-08
READ	hsa-miR-106b-5p	SRSF2	0.232753	0.00390637
SARC	hsa-miR-106b-5p	SRSF2	0.364964	1.51e-09
SKCM	hsa-miR-106b-5p	SRSF2	0.310062	1.84e-11
STAD	hsa-miR-106b-5p	SRSF2	0.346331	7.75e-12
TGCT	hsa-miR-106b-5p	SRSF2	0.239549	0.00268166
THCA	hsa-miR-106b-5p	SRSF2	0.145578	0.00103496
THYM	hsa-miR-106b-5p	SRSF2	0.557539	4.51e-11
UCEC	hsa-miR-106b-5p	SRSF2	0.230347	1.09e-07
UVM	hsa-miR-106b-5p	SRSF2	0.229187	0.0408596
BLCA	hsa-miR-10b-3p	SRSF2	0.213103	1.52e-05
BRCA	hsa-miR-10b-3p	SRSF2	-0.143483	2.64e-06
CHOL	hsa-miR-10b-3p	SRSF2	0.392742	0.017818
HNSC	hsa-miR-10b-3p	SRSF2	-0.179079	6.38e-05
KIRP	hsa-miR-10b-3p	SRSF2	-0.123941	0.0368405
LGG	hsa-miR-10b-3p	SRSF2	0.123925	0.00453637
LUSC	hsa-miR-10b-3p	SRSF2	0.10608	0.0222937
PAAD	hsa-miR-10b-3p	SRSF2	0.15191	0.0435457
PCPG	hsa-miR-10b-3p	SRSF2	0.318864	1.15e-05
PRAD	hsa-miR-10b-3p	SRSF2	0.110152	0.0148088
STAD	hsa-miR-10b-3p	SRSF2	0.168881	0.0011279
THCA	hsa-miR-10b-3p	SRSF2	-0.112879	0.0111339
UCEC	hsa-miR-10b-3p	SRSF2	0.117447	0.00733936
ACC	hsa-miR-130a-3p	SRSF2	0.409485	0.000197089
BLCA	hsa-miR-130a-3p	SRSF2	0.269641	3.55e-08
BRCA	hsa-miR-130a-3p	SRSF2	0.202599	2.61e-11
ESCA	hsa-miR-130a-3p	SRSF2	0.234215	0.00287343
HNSC	hsa-miR-130a-3p	SRSF2	0.270618	1.01e-09
KICH	hsa-miR-130a-3p	SRSF2	0.577667	5.8e-07
KIRC	hsa-miR-130a-3p	SRSF2	0.0912177	0.0420847
KIRP	hsa-miR-130a-3p	SRSF2	0.368512	1.46e-10
LGG	hsa-miR-130a-3p	SRSF2	0.134662	0.00202654
LIHC	hsa-miR-130a-3p	SRSF2	0.243641	2.32e-06
LUAD	hsa-miR-130a-3p	SRSF2	0.233486	1.14e-07
LUSC	hsa-miR-130a-3p	SRSF2	0.168666	0.000262684
MESO	hsa-miR-130a-3p	SRSF2	0.226136	0.036294
PAAD	hsa-miR-130a-3p	SRSF2	0.245323	0.000997872
PRAD	hsa-miR-130a-3p	SRSF2	-0.165764	0.000231667
SARC	hsa-miR-130a-3p	SRSF2	0.246803	6.15e-05
SKCM	hsa-miR-130a-3p	SRSF2	0.285731	6.97e-10
THCA	hsa-miR-130a-3p	SRSF2	0.350273	5.05e-16
THYM	hsa-miR-130a-3p	SRSF2	0.18876	0.0397906
UCEC	hsa-miR-130a-3p	SRSF2	0.147023	0.000771396
UCS	hsa-miR-130a-3p	SRSF2	0.390722	0.00318457
ACC	hsa-miR-134-5p	SRSF2	0.241311	0.0333078
BRCA	hsa-miR-134-5p	SRSF2	-0.153973	4.55e-07
HNSC	hsa-miR-134-5p	SRSF2	-0.1166	0.00956412
KICH	hsa-miR-134-5p	SRSF2	0.461461	0.000124085
LIHC	hsa-miR-134-5p	SRSF2	0.158818	0.00227687
PAAD	hsa-miR-134-5p	SRSF2	-0.265241	0.000359815
PCPG	hsa-miR-134-5p	SRSF2	0.16129	0.0296155
PRAD	hsa-miR-134-5p	SRSF2	-0.196164	1.25e-05
BLCA	hsa-miR-1468-5p	SRSF2	0.141924	0.00421187
CHOL	hsa-miR-1468-5p	SRSF2	0.43162	0.00857712
DLBC	hsa-miR-1468-5p	SRSF2	-0.318782	0.0289668
ESCA	hsa-miR-1468-5p	SRSF2	0.168306	0.0333848
HNSC	hsa-miR-1468-5p	SRSF2	0.199925	7.71e-06
KICH	hsa-miR-1468-5p	SRSF2	-0.2901	0.0200557
KIRP	hsa-miR-1468-5p	SRSF2	-0.186338	0.00161024
LGG	hsa-miR-1468-5p	SRSF2	-0.129802	0.0029399
LIHC	hsa-miR-1468-5p	SRSF2	-0.19794	0.000135151
PCPG	hsa-miR-1468-5p	SRSF2	0.187663	0.0111856
READ	hsa-miR-1468-5p	SRSF2	-0.313938	8.2e-05
TGCT	hsa-miR-1468-5p	SRSF2	-0.183357	0.0223892
BLCA	hsa-miR-148a-5p	SRSF2	0.191464	0.000105686
DLBC	hsa-miR-148a-5p	SRSF2	0.427652	0.00271426
ESCA	hsa-miR-148a-5p	SRSF2	0.16586	0.0360759
KIRP	hsa-miR-148a-5p	SRSF2	-0.193664	0.00103662
LUAD	hsa-miR-148a-5p	SRSF2	-0.10509	0.0182775
PAAD	hsa-miR-148a-5p	SRSF2	-0.428664	2.64e-09
STAD	hsa-miR-148a-5p	SRSF2	0.171083	0.000968219
TGCT	hsa-miR-148a-5p	SRSF2	0.278722	0.000445026
THYM	hsa-miR-148a-5p	SRSF2	0.328048	0.000270386
UVM	hsa-miR-148a-5p	SRSF2	-0.235533	0.0354479
BLCA	hsa-miR-153-5p	SRSF2	0.130383	0.00861373
BRCA	hsa-miR-153-5p	SRSF2	-0.114842	0.000175232
DLBC	hsa-miR-153-5p	SRSF2	-0.343984	0.0179097
KICH	hsa-miR-153-5p	SRSF2	0.311863	0.0121198
PAAD	hsa-miR-153-5p	SRSF2	-0.170127	0.0235814
PCPG	hsa-miR-153-5p	SRSF2	0.197989	0.00737993
PRAD	hsa-miR-153-5p	SRSF2	-0.103689	0.0218354
SARC	hsa-miR-153-5p	SRSF2	0.129067	0.0382908
THCA	hsa-miR-153-5p	SRSF2	0.202472	4.51e-06
ACC	hsa-miR-17-5p	SRSF2	0.326579	0.00352099
BLCA	hsa-miR-17-5p	SRSF2	0.396623	1.04e-16
BRCA	hsa-miR-17-5p	SRSF2	0.347543	1.54e-31
CESC	hsa-miR-17-5p	SRSF2	0.141441	0.0134186
CHOL	hsa-miR-17-5p	SRSF2	0.526057	0.000983207
COAD	hsa-miR-17-5p	SRSF2	0.280909	4.49e-09
DLBC	hsa-miR-17-5p	SRSF2	0.379814	0.00845744
ESCA	hsa-miR-17-5p	SRSF2	0.338093	1.23e-05
HNSC	hsa-miR-17-5p	SRSF2	0.359132	1.87e-16
KICH	hsa-miR-17-5p	SRSF2	0.351164	0.00443893
KIRC	hsa-miR-17-5p	SRSF2	0.220577	6.82e-07
KIRP	hsa-miR-17-5p	SRSF2	0.17328	0.00339524
LGG	hsa-miR-17-5p	SRSF2	0.30674	7.41e-13
LIHC	hsa-miR-17-5p	SRSF2	0.303474	2.95e-09
LUAD	hsa-miR-17-5p	SRSF2	0.393647	3.96e-20
LUSC	hsa-miR-17-5p	SRSF2	0.391753	1.81e-18
MESO	hsa-miR-17-5p	SRSF2	0.339873	0.00136666
OV	hsa-miR-17-5p	SRSF2	0.104392	0.0450719
PAAD	hsa-miR-17-5p	SRSF2	0.277484	0.000184584
PRAD	hsa-miR-17-5p	SRSF2	0.319017	4.97e-13
READ	hsa-miR-17-5p	SRSF2	0.24825	0.00204379
SARC	hsa-miR-17-5p	SRSF2	0.313065	2.84e-07
SKCM	hsa-miR-17-5p	SRSF2	0.335504	2.83e-13
STAD	hsa-miR-17-5p	SRSF2	0.393703	3.94e-15
TGCT	hsa-miR-17-5p	SRSF2	0.285823	0.000311954
THCA	hsa-miR-17-5p	SRSF2	0.155006	0.000472576
THYM	hsa-miR-17-5p	SRSF2	0.600348	5.34e-13
UCEC	hsa-miR-17-5p	SRSF2	0.368313	3.76e-18
UCS	hsa-miR-17-5p	SRSF2	0.273971	0.0429635
UVM	hsa-miR-17-5p	SRSF2	0.258456	0.0206238
ACC	hsa-miR-183-5p	SRSF2	0.323986	0.00380792
BLCA	hsa-miR-183-5p	SRSF2	0.224757	4.93e-06
BRCA	hsa-miR-183-5p	SRSF2	0.101364	0.000934659
HNSC	hsa-miR-183-5p	SRSF2	0.126797	0.00480843
KIRC	hsa-miR-183-5p	SRSF2	-0.143519	0.00133608
LGG	hsa-miR-183-5p	SRSF2	0.158414	0.000275697
LIHC	hsa-miR-183-5p	SRSF2	0.188187	0.000288636
LUAD	hsa-miR-183-5p	SRSF2	0.1396	0.00168014
LUSC	hsa-miR-183-5p	SRSF2	0.0981011	0.0346385
PCPG	hsa-miR-183-5p	SRSF2	-0.180795	0.0145896
PRAD	hsa-miR-183-5p	SRSF2	0.321642	3.12e-13
SARC	hsa-miR-183-5p	SRSF2	0.187767	0.00245913
STAD	hsa-miR-183-5p	SRSF2	0.266971	1.93e-07
TGCT	hsa-miR-183-5p	SRSF2	0.356582	5.26e-06
THCA	hsa-miR-183-5p	SRSF2	-0.222977	4.14e-07
BRCA	hsa-miR-193a-3p	SRSF2	0.130298	2.03e-05
COAD	hsa-miR-193a-3p	SRSF2	0.115113	0.0181399
DLBC	hsa-miR-193a-3p	SRSF2	-0.35761	0.0135928
ESCA	hsa-miR-193a-3p	SRSF2	0.18891	0.0167391
KICH	hsa-miR-193a-3p	SRSF2	0.443536	0.00024183
LAML	hsa-miR-193a-3p	SRSF2	-0.170861	0.0392109
LIHC	hsa-miR-193a-3p	SRSF2	0.136632	0.00877071
SARC	hsa-miR-193a-3p	SRSF2	0.177037	0.00433908
SKCM	hsa-miR-193a-3p	SRSF2	0.131654	0.00520455
THCA	hsa-miR-193a-3p	SRSF2	0.0999781	0.0246532
BLCA	hsa-miR-20a-5p	SRSF2	0.386914	6.52e-16
BRCA	hsa-miR-20a-5p	SRSF2	0.353881	1.03e-32
CESC	hsa-miR-20a-5p	SRSF2	0.137933	0.0159292
CHOL	hsa-miR-20a-5p	SRSF2	0.500114	0.00189663
COAD	hsa-miR-20a-5p	SRSF2	0.234617	1.13e-06
DLBC	hsa-miR-20a-5p	SRSF2	0.538267	9.52e-05
ESCA	hsa-miR-20a-5p	SRSF2	0.308911	7.05e-05
HNSC	hsa-miR-20a-5p	SRSF2	0.394042	9.23e-20
KICH	hsa-miR-20a-5p	SRSF2	0.286383	0.0217796
KIRC	hsa-miR-20a-5p	SRSF2	0.292378	2.98e-11
KIRP	hsa-miR-20a-5p	SRSF2	0.153899	0.0093878
LGG	hsa-miR-20a-5p	SRSF2	0.353977	6.97e-17
LIHC	hsa-miR-20a-5p	SRSF2	0.29305	1.06e-08
LUAD	hsa-miR-20a-5p	SRSF2	0.420633	4.99e-23
LUSC	hsa-miR-20a-5p	SRSF2	0.385679	6.63e-18
MESO	hsa-miR-20a-5p	SRSF2	0.270214	0.0118631
PAAD	hsa-miR-20a-5p	SRSF2	0.281635	0.00014615
PRAD	hsa-miR-20a-5p	SRSF2	0.339225	1.24e-14
READ	hsa-miR-20a-5p	SRSF2	0.217782	0.00703343
SARC	hsa-miR-20a-5p	SRSF2	0.286992	2.78e-06
SKCM	hsa-miR-20a-5p	SRSF2	0.280053	1.55e-09
STAD	hsa-miR-20a-5p	SRSF2	0.365514	4.17e-13
TGCT	hsa-miR-20a-5p	SRSF2	0.451262	3.79e-09
THCA	hsa-miR-20a-5p	SRSF2	0.181115	4.24e-05
THYM	hsa-miR-20a-5p	SRSF2	0.587946	2.06e-12
UCEC	hsa-miR-20a-5p	SRSF2	0.430994	6.19e-25
BLCA	hsa-miR-20b-5p	SRSF2	0.244366	6.42e-07
BRCA	hsa-miR-20b-5p	SRSF2	0.0966658	0.00160308
CESC	hsa-miR-20b-5p	SRSF2	0.229995	5.02e-05
DLBC	hsa-miR-20b-5p	SRSF2	0.475731	0.000725778
HNSC	hsa-miR-20b-5p	SRSF2	0.205218	4.35e-06
LIHC	hsa-miR-20b-5p	SRSF2	0.196025	0.000157318
LUAD	hsa-miR-20b-5p	SRSF2	0.249777	1.32e-08
LUSC	hsa-miR-20b-5p	SRSF2	0.256277	2.15e-08
MESO	hsa-miR-20b-5p	SRSF2	0.240576	0.0256652
PRAD	hsa-miR-20b-5p	SRSF2	0.161266	0.000342976
SARC	hsa-miR-20b-5p	SRSF2	0.150102	0.0158232
SKCM	hsa-miR-20b-5p	SRSF2	0.171544	0.000260279
THYM	hsa-miR-20b-5p	SRSF2	0.597622	7.22e-13
BRCA	hsa-miR-221-3p	SRSF2	0.0712158	0.0202267
KICH	hsa-miR-221-3p	SRSF2	-0.333121	0.00715087
LGG	hsa-miR-221-3p	SRSF2	-0.132477	0.00239913
LIHC	hsa-miR-221-3p	SRSF2	0.119918	0.021576
LUAD	hsa-miR-221-3p	SRSF2	-0.138617	0.00181288
PAAD	hsa-miR-221-3p	SRSF2	0.153276	0.0416695
PRAD	hsa-miR-221-3p	SRSF2	-0.308086	3.27e-12
STAD	hsa-miR-221-3p	SRSF2	0.119728	0.0214273
TGCT	hsa-miR-221-3p	SRSF2	-0.219886	0.00597545
THCA	hsa-miR-221-3p	SRSF2	0.1093	0.0139911
THYM	hsa-miR-221-3p	SRSF2	-0.405067	4.89e-06
UCEC	hsa-miR-221-3p	SRSF2	0.147098	0.000766583
UVM	hsa-miR-221-3p	SRSF2	-0.464288	1.44e-05
BRCA	hsa-miR-222-3p	SRSF2	0.0851879	0.00544891
CHOL	hsa-miR-222-3p	SRSF2	0.369578	0.0265265
COAD	hsa-miR-222-3p	SRSF2	0.119279	0.0143305
KICH	hsa-miR-222-3p	SRSF2	-0.270035	0.0309303
KIRC	hsa-miR-222-3p	SRSF2	-0.132002	0.00319544
LGG	hsa-miR-222-3p	SRSF2	-0.120359	0.00585209
LIHC	hsa-miR-222-3p	SRSF2	0.20686	6.54e-05
PAAD	hsa-miR-222-3p	SRSF2	0.222484	0.00291676
PRAD	hsa-miR-222-3p	SRSF2	-0.263586	3.24e-09
SKCM	hsa-miR-222-3p	SRSF2	0.0974873	0.0389341
STAD	hsa-miR-222-3p	SRSF2	0.186027	0.000327219
THCA	hsa-miR-222-3p	SRSF2	0.132369	0.00287889
THYM	hsa-miR-222-3p	SRSF2	-0.382275	1.78e-05
UVM	hsa-miR-222-3p	SRSF2	-0.377469	0.000557116
BRCA	hsa-miR-2355-5p	SRSF2	0.169019	2.95e-08
CHOL	hsa-miR-2355-5p	SRSF2	0.499695	0.00191606
COAD	hsa-miR-2355-5p	SRSF2	0.108006	0.0266915
DLBC	hsa-miR-2355-5p	SRSF2	-0.380477	0.00833417
KIRC	hsa-miR-2355-5p	SRSF2	0.205403	3.89e-06
LIHC	hsa-miR-2355-5p	SRSF2	0.24902	1.36e-06
LUAD	hsa-miR-2355-5p	SRSF2	0.116818	0.00866383
LUSC	hsa-miR-2355-5p	SRSF2	-0.193645	2.67e-05
PAAD	hsa-miR-2355-5p	SRSF2	0.257582	0.00053775
STAD	hsa-miR-2355-5p	SRSF2	0.118625	0.0226653
THCA	hsa-miR-2355-5p	SRSF2	0.116897	0.00855247
THYM	hsa-miR-2355-5p	SRSF2	0.506987	4.01e-09
UVM	hsa-miR-2355-5p	SRSF2	0.239207	0.032599
BRCA	hsa-miR-29b-2-5p	SRSF2	-0.0807466	0.00844248
COAD	hsa-miR-29b-2-5p	SRSF2	-0.103773	0.0332824
HNSC	hsa-miR-29b-2-5p	SRSF2	0.278499	3.12e-10
LGG	hsa-miR-29b-2-5p	SRSF2	-0.185636	1.93e-05
LIHC	hsa-miR-29b-2-5p	SRSF2	-0.169539	0.00111236
LUAD	hsa-miR-29b-2-5p	SRSF2	-0.121261	0.00641843
PCPG	hsa-miR-29b-2-5p	SRSF2	0.305349	2.77e-05
STAD	hsa-miR-29b-2-5p	SRSF2	-0.219586	2.08e-05
THCA	hsa-miR-29b-2-5p	SRSF2	0.124918	0.00493509
UCEC	hsa-miR-29b-2-5p	SRSF2	-0.15244	0.000486277
ACC	hsa-miR-301a-3p	SRSF2	0.409464	0.000197253
BLCA	hsa-miR-301a-3p	SRSF2	0.392603	2.24e-16
BRCA	hsa-miR-301a-3p	SRSF2	0.320496	8.1e-27
CESC	hsa-miR-301a-3p	SRSF2	0.200573	0.000424506
COAD	hsa-miR-301a-3p	SRSF2	0.226586	2.65e-06
ESCA	hsa-miR-301a-3p	SRSF2	0.339695	1.11e-05
HNSC	hsa-miR-301a-3p	SRSF2	0.252352	1.34e-08
KICH	hsa-miR-301a-3p	SRSF2	0.37588	0.00220697
KIRC	hsa-miR-301a-3p	SRSF2	0.153622	0.000589138
KIRP	hsa-miR-301a-3p	SRSF2	0.192823	0.00109122
LGG	hsa-miR-301a-3p	SRSF2	0.109075	0.0125625
LIHC	hsa-miR-301a-3p	SRSF2	0.378505	6.03e-14
LUAD	hsa-miR-301a-3p	SRSF2	0.293551	1.79e-11
LUSC	hsa-miR-301a-3p	SRSF2	0.301138	3.51e-11
PCPG	hsa-miR-301a-3p	SRSF2	-0.185585	0.0121327
PRAD	hsa-miR-301a-3p	SRSF2	0.18448	4.06e-05
READ	hsa-miR-301a-3p	SRSF2	0.320144	5.8e-05
SARC	hsa-miR-301a-3p	SRSF2	0.302004	7.68e-07
SKCM	hsa-miR-301a-3p	SRSF2	0.139653	0.003022
STAD	hsa-miR-301a-3p	SRSF2	0.343891	1.11e-11
TGCT	hsa-miR-301a-3p	SRSF2	-0.162925	0.042813
THCA	hsa-miR-301a-3p	SRSF2	0.176106	6.93e-05
UCEC	hsa-miR-301a-3p	SRSF2	0.220505	3.8e-07
ACC	hsa-miR-30a-3p	SRSF2	-0.223458	0.0492285
BRCA	hsa-miR-30a-3p	SRSF2	-0.0995149	0.00115892
CESC	hsa-miR-30a-3p	SRSF2	-0.123945	0.0304593
COAD	hsa-miR-30a-3p	SRSF2	-0.213881	9.57e-06
HNSC	hsa-miR-30a-3p	SRSF2	0.103014	0.0221629
LGG	hsa-miR-30a-3p	SRSF2	-0.191246	1.06e-05
LUAD	hsa-miR-30a-3p	SRSF2	-0.270877	6.33e-10
LUSC	hsa-miR-30a-3p	SRSF2	-0.171014	0.000214651
PRAD	hsa-miR-30a-3p	SRSF2	-0.147963	0.001032
SKCM	hsa-miR-30a-3p	SRSF2	-0.151098	0.00132168
STAD	hsa-miR-30a-3p	SRSF2	-0.16435	0.00153536
TGCT	hsa-miR-30a-3p	SRSF2	-0.277664	0.000468858
THCA	hsa-miR-30a-3p	SRSF2	-0.193809	1.15e-05
THYM	hsa-miR-30a-3p	SRSF2	-0.182722	0.0467016
BLCA	hsa-miR-30d-3p	SRSF2	0.147848	0.00285814
BRCA	hsa-miR-30d-3p	SRSF2	0.0900497	0.00329837
CESC	hsa-miR-30d-3p	SRSF2	0.163109	0.00428972
HNSC	hsa-miR-30d-3p	SRSF2	0.277476	3.64e-10
MESO	hsa-miR-30d-3p	SRSF2	0.239044	0.0266498
PRAD	hsa-miR-30d-3p	SRSF2	0.197386	1.1e-05
SARC	hsa-miR-30d-3p	SRSF2	0.145782	0.0191415
STAD	hsa-miR-30d-3p	SRSF2	0.122032	0.0190284
TGCT	hsa-miR-30d-3p	SRSF2	0.177064	0.0275224
THCA	hsa-miR-30d-3p	SRSF2	0.171338	0.000109078
UVM	hsa-miR-30d-3p	SRSF2	0.220654	0.0492018
BLCA	hsa-miR-30e-3p	SRSF2	0.10217	0.0398644
DLBC	hsa-miR-30e-3p	SRSF2	-0.340368	0.0192331
HNSC	hsa-miR-30e-3p	SRSF2	0.137861	0.00215572
KICH	hsa-miR-30e-3p	SRSF2	-0.405478	0.000887669
LGG	hsa-miR-30e-3p	SRSF2	-0.239087	3.11e-08
LUAD	hsa-miR-30e-3p	SRSF2	-0.182733	3.68e-05
SARC	hsa-miR-30e-3p	SRSF2	0.178834	0.00395386
TGCT	hsa-miR-30e-3p	SRSF2	0.316989	5.85e-05
THCA	hsa-miR-30e-3p	SRSF2	-0.196395	8.75e-06
THYM	hsa-miR-30e-3p	SRSF2	0.254359	0.00524635
UCEC	hsa-miR-30e-3p	SRSF2	-0.11121	0.0111571
BRCA	hsa-miR-3161	SRSF2	0.07135	0.0199918
KIRP	hsa-miR-3161	SRSF2	-0.148516	0.0122203
LIHC	hsa-miR-3161	SRSF2	0.185641	0.000349737
OV	hsa-miR-3161	SRSF2	0.122665	0.018412
SARC	hsa-miR-3161	SRSF2	0.144695	0.0200661
SKCM	hsa-miR-3161	SRSF2	0.147344	0.00174467
HNSC	hsa-miR-338-3p	SRSF2	0.174796	9.57e-05
KICH	hsa-miR-338-3p	SRSF2	0.432474	0.00035854
KIRC	hsa-miR-338-3p	SRSF2	0.116212	0.0095134
LIHC	hsa-miR-338-3p	SRSF2	0.13383	0.0102692
MESO	hsa-miR-338-3p	SRSF2	0.302774	0.00460339
PCPG	hsa-miR-338-3p	SRSF2	0.220564	0.00277148
PRAD	hsa-miR-338-3p	SRSF2	0.137909	0.00223982
STAD	hsa-miR-338-3p	SRSF2	0.212972	3.71e-05
TGCT	hsa-miR-338-3p	SRSF2	-0.240678	0.00255597
THCA	hsa-miR-338-3p	SRSF2	0.289024	3.57e-11
UCEC	hsa-miR-338-3p	SRSF2	0.149466	0.000627658
COAD	hsa-miR-34b-5p	SRSF2	-0.13804	0.00454655
ESCA	hsa-miR-34b-5p	SRSF2	0.171687	0.029946
HNSC	hsa-miR-34b-5p	SRSF2	0.119848	0.00772362
KICH	hsa-miR-34b-5p	SRSF2	0.489748	4e-05
LIHC	hsa-miR-34b-5p	SRSF2	0.114253	0.0286356
THCA	hsa-miR-34b-5p	SRSF2	0.121036	0.00646482
THYM	hsa-miR-34b-5p	SRSF2	-0.283006	0.00181673
UCEC	hsa-miR-34b-5p	SRSF2	-0.154923	0.00039155
COAD	hsa-miR-34c-5p	SRSF2	-0.214344	9.14e-06
ESCA	hsa-miR-34c-5p	SRSF2	0.18943	0.0164353
KICH	hsa-miR-34c-5p	SRSF2	0.388654	0.00150497
LIHC	hsa-miR-34c-5p	SRSF2	0.139437	0.00746854
THYM	hsa-miR-34c-5p	SRSF2	-0.246672	0.00684285
UCEC	hsa-miR-34c-5p	SRSF2	-0.117859	0.00713409
ACC	hsa-miR-3609	SRSF2	0.280298	0.0129333
BLCA	hsa-miR-3609	SRSF2	0.12773	0.0100786
ESCA	hsa-miR-3609	SRSF2	0.215565	0.00618924
HNSC	hsa-miR-3609	SRSF2	0.185418	3.44e-05
KIRC	hsa-miR-3609	SRSF2	0.131553	0.00330145
PCPG	hsa-miR-3609	SRSF2	0.18	0.0150369
SKCM	hsa-miR-3609	SRSF2	0.138049	0.00337757
THYM	hsa-miR-3609	SRSF2	0.234883	0.0101315
BLCA	hsa-miR-3613-3p	SRSF2	0.105611	0.0336071
KICH	hsa-miR-3613-3p	SRSF2	0.258233	0.0393759
LUSC	hsa-miR-3613-3p	SRSF2	0.11035	0.0174132
PRAD	hsa-miR-3613-3p	SRSF2	0.168124	0.0001878
SKCM	hsa-miR-3613-3p	SRSF2	0.177989	0.000149849
TGCT	hsa-miR-3613-3p	SRSF2	-0.217332	0.00659957
THYM	hsa-miR-3613-3p	SRSF2	0.461445	1.28e-07
ACC	hsa-miR-3622a-3p	SRSF2	0.255735	0.0238309
BRCA	hsa-miR-3622a-3p	SRSF2	0.0654111	0.0329726
HNSC	hsa-miR-3622a-3p	SRSF2	0.0919002	0.0413848
KIRC	hsa-miR-3622a-3p	SRSF2	0.0955553	0.0331903
KIRP	hsa-miR-3622a-3p	SRSF2	0.166989	0.0047788
LGG	hsa-miR-3622a-3p	SRSF2	-0.144367	0.000929551
PRAD	hsa-miR-3622a-3p	SRSF2	-0.150099	0.00086981
SKCM	hsa-miR-3622a-3p	SRSF2	0.118274	0.0121417
STAD	hsa-miR-3622a-3p	SRSF2	-0.214131	3.36e-05
TGCT	hsa-miR-3622a-3p	SRSF2	-0.203319	0.0111688
THCA	hsa-miR-3622a-3p	SRSF2	0.137785	0.00191261
THYM	hsa-miR-3622a-3p	SRSF2	-0.22591	0.0134964
UCEC	hsa-miR-3622a-3p	SRSF2	0.0913925	0.0372133
KICH	hsa-miR-383-5p	SRSF2	0.264442	0.0347218
LGG	hsa-miR-383-5p	SRSF2	-0.121255	0.00549258
LIHC	hsa-miR-383-5p	SRSF2	0.138	0.00811224
PAAD	hsa-miR-383-5p	SRSF2	-0.164497	0.0286756
PCPG	hsa-miR-383-5p	SRSF2	-0.302768	3.26e-05
TGCT	hsa-miR-383-5p	SRSF2	-0.275027	0.000533451
THYM	hsa-miR-383-5p	SRSF2	-0.255115	0.00510876
UCEC	hsa-miR-383-5p	SRSF2	0.111658	0.0108334
ACC	hsa-miR-454-3p	SRSF2	0.399813	0.00028725
BLCA	hsa-miR-454-3p	SRSF2	0.368183	1.9e-14
BRCA	hsa-miR-454-3p	SRSF2	0.340039	3.5e-30
CESC	hsa-miR-454-3p	SRSF2	0.224949	7.39e-05
COAD	hsa-miR-454-3p	SRSF2	0.228384	2.19e-06
ESCA	hsa-miR-454-3p	SRSF2	0.370697	1.4e-06
HNSC	hsa-miR-454-3p	SRSF2	0.346	2.6e-15
KICH	hsa-miR-454-3p	SRSF2	0.248106	0.0480692
KIRC	hsa-miR-454-3p	SRSF2	0.0997385	0.0261842
KIRP	hsa-miR-454-3p	SRSF2	0.129186	0.02951
LGG	hsa-miR-454-3p	SRSF2	0.143808	0.000973513
LIHC	hsa-miR-454-3p	SRSF2	0.415095	1.02e-16
LUAD	hsa-miR-454-3p	SRSF2	0.371379	6.29e-18
LUSC	hsa-miR-454-3p	SRSF2	0.41565	8.29e-21
MESO	hsa-miR-454-3p	SRSF2	0.26409	0.0140095
PRAD	hsa-miR-454-3p	SRSF2	0.218505	1.07e-06
READ	hsa-miR-454-3p	SRSF2	0.295495	0.000219096
SARC	hsa-miR-454-3p	SRSF2	0.449286	3.2e-14
SKCM	hsa-miR-454-3p	SRSF2	0.180343	0.000121893
STAD	hsa-miR-454-3p	SRSF2	0.328812	9.43e-11
THCA	hsa-miR-454-3p	SRSF2	0.0933356	0.0360079
THYM	hsa-miR-454-3p	SRSF2	0.286737	0.00156916
UCEC	hsa-miR-454-3p	SRSF2	0.158371	0.000288262
UVM	hsa-miR-454-3p	SRSF2	0.231322	0.038967
BRCA	hsa-miR-4772-5p	SRSF2	0.150261	8.6e-07
CHOL	hsa-miR-4772-5p	SRSF2	0.385598	0.0202025
COAD	hsa-miR-4772-5p	SRSF2	0.120832	0.0131016
KICH	hsa-miR-4772-5p	SRSF2	0.435482	0.000322563
LIHC	hsa-miR-4772-5p	SRSF2	0.143403	0.00592184
LUAD	hsa-miR-4772-5p	SRSF2	0.0991558	0.026014
MESO	hsa-miR-4772-5p	SRSF2	0.291144	0.00653536
PAAD	hsa-miR-4772-5p	SRSF2	0.256603	0.000565583
PRAD	hsa-miR-4772-5p	SRSF2	0.207663	3.64e-06
STAD	hsa-miR-4772-5p	SRSF2	0.20346	8.27e-05
COAD	hsa-miR-485-3p	SRSF2	-0.156904	0.00123856
KICH	hsa-miR-485-3p	SRSF2	0.418096	0.000586539
LGG	hsa-miR-485-3p	SRSF2	-0.216493	5.78e-07
LIHC	hsa-miR-485-3p	SRSF2	0.159756	0.00214218
PAAD	hsa-miR-485-3p	SRSF2	-0.164465	0.028708
READ	hsa-miR-485-3p	SRSF2	-0.205238	0.0111962
TGCT	hsa-miR-485-3p	SRSF2	0.207091	0.00972413
BLCA	hsa-miR-500a-5p	SRSF2	0.210139	2.01e-05
BRCA	hsa-miR-500a-5p	SRSF2	0.195243	1.36e-10
HNSC	hsa-miR-500a-5p	SRSF2	0.201921	6.22e-06
KIRC	hsa-miR-500a-5p	SRSF2	0.170944	0.000128363
LAML	hsa-miR-500a-5p	SRSF2	-0.182279	0.0276626
LGG	hsa-miR-500a-5p	SRSF2	0.0888261	0.0423021
LUAD	hsa-miR-500a-5p	SRSF2	0.143016	0.00128504
LUSC	hsa-miR-500a-5p	SRSF2	0.146446	0.00156094
MESO	hsa-miR-500a-5p	SRSF2	0.263523	0.014224
PRAD	hsa-miR-500a-5p	SRSF2	0.123127	0.00640763
SARC	hsa-miR-500a-5p	SRSF2	0.125014	0.0448402
SKCM	hsa-miR-500a-5p	SRSF2	0.0988466	0.0362766
STAD	hsa-miR-500a-5p	SRSF2	0.221472	1.76e-05
TGCT	hsa-miR-500a-5p	SRSF2	-0.15841	0.0489909
UCEC	hsa-miR-500a-5p	SRSF2	0.124317	0.00452453
UCS	hsa-miR-500a-5p	SRSF2	-0.27283	0.0438735
BLCA	hsa-miR-501-5p	SRSF2	0.245442	5.71e-07
BRCA	hsa-miR-501-5p	SRSF2	0.200164	4.54e-11
COAD	hsa-miR-501-5p	SRSF2	0.105458	0.0305093
HNSC	hsa-miR-501-5p	SRSF2	0.168297	0.000173946
KIRC	hsa-miR-501-5p	SRSF2	0.116249	0.00949041
KIRP	hsa-miR-501-5p	SRSF2	-0.144594	0.0147353
LAML	hsa-miR-501-5p	SRSF2	-0.178932	0.0307003
LGG	hsa-miR-501-5p	SRSF2	0.0874415	0.0456341
LUAD	hsa-miR-501-5p	SRSF2	0.1723	0.000101226
LUSC	hsa-miR-501-5p	SRSF2	0.147388	0.00145422
MESO	hsa-miR-501-5p	SRSF2	0.346919	0.00106647
STAD	hsa-miR-501-5p	SRSF2	0.163563	0.00161852
UCEC	hsa-miR-501-5p	SRSF2	0.216968	5.87e-07
UCS	hsa-miR-501-5p	SRSF2	-0.284356	0.0353739
BRCA	hsa-miR-519a-3p	SRSF2	0.0625772	0.0413656
CHOL	hsa-miR-519a-3p	SRSF2	-0.411212	0.0127198
DLBC	hsa-miR-519a-3p	SRSF2	0.434886	0.00225245
KICH	hsa-miR-519a-3p	SRSF2	0.410291	0.000759346
KIRC	hsa-miR-519a-3p	SRSF2	0.159058	0.000371246
LGG	hsa-miR-519a-3p	SRSF2	0.0864439	0.0481692
READ	hsa-miR-519a-3p	SRSF2	0.16666	0.0401568
SKCM	hsa-miR-519a-3p	SRSF2	0.149006	0.00154408
TGCT	hsa-miR-519a-3p	SRSF2	0.194665	0.0152156
KICH	hsa-miR-519b-3p	SRSF2	0.387704	0.00154923
MESO	hsa-miR-519b-3p	SRSF2	-0.316809	0.0029593
SKCM	hsa-miR-519b-3p	SRSF2	0.158866	0.000729075
TGCT	hsa-miR-519b-3p	SRSF2	0.211191	0.00834334
DLBC	hsa-miR-519c-3p	SRSF2	0.29339	0.045338
KICH	hsa-miR-519c-3p	SRSF2	0.429166	0.000402312
LGG	hsa-miR-519c-3p	SRSF2	0.107481	0.013923
MESO	hsa-miR-519c-3p	SRSF2	-0.246358	0.0222216
SKCM	hsa-miR-519c-3p	SRSF2	0.129143	0.00613734
TGCT	hsa-miR-519c-3p	SRSF2	0.194383	0.0153666
DLBC	hsa-miR-519d-3p	SRSF2	0.332761	0.022288
KICH	hsa-miR-519d-3p	SRSF2	0.405128	0.000897732
LAML	hsa-miR-519d-3p	SRSF2	-0.173888	0.0358116
MESO	hsa-miR-519d-3p	SRSF2	-0.277833	0.00959698
SKCM	hsa-miR-519d-3p	SRSF2	0.163712	0.000496103
TGCT	hsa-miR-519d-3p	SRSF2	0.214608	0.00732837
KICH	hsa-miR-526b-3p	SRSF2	0.417661	0.000595139
SARC	hsa-miR-526b-3p	SRSF2	0.122163	0.0499902
SKCM	hsa-miR-526b-3p	SRSF2	0.137213	0.00357761
TGCT	hsa-miR-526b-3p	SRSF2	0.199084	0.0130124
KICH	hsa-miR-539-3p	SRSF2	0.419484	0.000559852
LGG	hsa-miR-539-3p	SRSF2	-0.189538	1.28e-05
LIHC	hsa-miR-539-3p	SRSF2	0.165867	0.00142846
TGCT	hsa-miR-539-3p	SRSF2	0.227789	0.00436404
BLCA	hsa-miR-548v	SRSF2	0.14076	0.00453784
CESC	hsa-miR-548v	SRSF2	0.127095	0.0264525
HNSC	hsa-miR-548v	SRSF2	0.245485	3.36e-08
KIRC	hsa-miR-548v	SRSF2	-0.134933	0.00257536
LIHC	hsa-miR-548v	SRSF2	0.148084	0.00447064
LUAD	hsa-miR-548v	SRSF2	0.10145	0.0227399
SARC	hsa-miR-548v	SRSF2	0.126425	0.0424611
STAD	hsa-miR-548v	SRSF2	0.267617	1.8e-07
UCEC	hsa-miR-548v	SRSF2	-0.116837	0.00765287
UCS	hsa-miR-548v	SRSF2	0.377877	0.00445044
UVM	hsa-miR-548v	SRSF2	-0.286612	0.00995165
BLCA	hsa-miR-5589-3p	SRSF2	-0.11088	0.0256549
CESC	hsa-miR-5589-3p	SRSF2	-0.206581	0.000280986
COAD	hsa-miR-5589-3p	SRSF2	0.172892	0.000365552
LGG	hsa-miR-5589-3p	SRSF2	0.0911255	0.0372224
LIHC	hsa-miR-5589-3p	SRSF2	-0.114331	0.0285253
READ	hsa-miR-5589-3p	SRSF2	0.247826	0.00208147
UVM	hsa-miR-5589-3p	SRSF2	0.242211	0.0304144
ACC	hsa-miR-6720-3p	SRSF2	0.227667	0.0450005
BLCA	hsa-miR-6720-3p	SRSF2	0.121785	0.0141894
BRCA	hsa-miR-6720-3p	SRSF2	0.0712978	0.0200829
KIRP	hsa-miR-6720-3p	SRSF2	0.154381	0.0091649
LGG	hsa-miR-6720-3p	SRSF2	-0.0974155	0.0258949
LIHC	hsa-miR-6720-3p	SRSF2	0.210593	4.78e-05
PCPG	hsa-miR-6720-3p	SRSF2	-0.164415	0.026561
PRAD	hsa-miR-6720-3p	SRSF2	-0.160424	0.000368691
TGCT	hsa-miR-6720-3p	SRSF2	-0.320918	4.68e-05
KIRP	hsa-miR-675-3p	SRSF2	0.173119	0.00342563
LGG	hsa-miR-675-3p	SRSF2	0.135746	0.0018621
LUAD	hsa-miR-675-3p	SRSF2	0.0997989	0.0250577
PRAD	hsa-miR-675-3p	SRSF2	-0.200775	7.67e-06
SKCM	hsa-miR-675-3p	SRSF2	0.208573	8.34e-06
STAD	hsa-miR-675-3p	SRSF2	0.109559	0.0353994
THCA	hsa-miR-675-3p	SRSF2	0.0882051	0.0475786
BLCA	hsa-miR-885-5p	SRSF2	0.182569	0.000220874
HNSC	hsa-miR-885-5p	SRSF2	0.0893259	0.0474471
LGG	hsa-miR-885-5p	SRSF2	-0.240098	2.71e-08
LIHC	hsa-miR-885-5p	SRSF2	-0.197329	0.000141889
PCPG	hsa-miR-885-5p	SRSF2	0.169438	0.0222163
TGCT	hsa-miR-885-5p	SRSF2	-0.18557	0.020792
KIRC	hsa-miR-888-5p	SRSF2	-0.119491	0.00765967
ACC	hsa-miR-107	SRSF1	0.240626	0.0338271
BLCA	hsa-miR-107	SRSF1	0.309033	2.07e-10
BRCA	hsa-miR-107	SRSF1	0.101623	0.000906761
COAD	hsa-miR-107	SRSF1	0.156998	0.0012301
ESCA	hsa-miR-107	SRSF1	0.285991	0.000246335
HNSC	hsa-miR-107	SRSF1	0.163376	0.000269661
KIRP	hsa-miR-107	SRSF1	-0.292241	5.36e-07
LGG	hsa-miR-107	SRSF1	-0.322136	4.3e-14
LUAD	hsa-miR-107	SRSF1	0.151468	0.00064557
LUSC	hsa-miR-107	SRSF1	0.283528	5e-10
OV	hsa-miR-107	SRSF1	0.284929	2.54e-08
PCPG	hsa-miR-107	SRSF1	0.3165	1.34e-05
PRAD	hsa-miR-107	SRSF1	0.101394	0.0249487
SARC	hsa-miR-107	SRSF1	0.288072	2.54e-06
STAD	hsa-miR-107	SRSF1	0.327717	1.1e-10
THCA	hsa-miR-107	SRSF1	0.111201	0.012402
UCEC	hsa-miR-107	SRSF1	0.268538	4.86e-10
UCS	hsa-miR-107	SRSF1	0.445105	0.000661565
BLCA	hsa-miR-10a-5p	SRSF1	0.116992	0.0185112
CESC	hsa-miR-10a-5p	SRSF1	0.1874	0.00100709
LGG	hsa-miR-10a-5p	SRSF1	0.134077	0.0021207
PAAD	hsa-miR-10a-5p	SRSF1	0.164205	0.028964
TGCT	hsa-miR-10a-5p	SRSF1	-0.212467	0.0079508
THCA	hsa-miR-10a-5p	SRSF1	-0.142929	0.00127957
BRCA	hsa-miR-10b-5p	SRSF1	-0.0651686	0.0336288
KIRC	hsa-miR-10b-5p	SRSF1	0.124607	0.00540602
LGG	hsa-miR-10b-5p	SRSF1	0.25647	2.66e-09
LUSC	hsa-miR-10b-5p	SRSF1	0.141002	0.00233219
OV	hsa-miR-10b-5p	SRSF1	0.124068	0.0171066
PAAD	hsa-miR-10b-5p	SRSF1	0.160365	0.032989
PCPG	hsa-miR-10b-5p	SRSF1	0.306002	2.66e-05
SKCM	hsa-miR-10b-5p	SRSF1	0.09524	0.0436891
STAD	hsa-miR-10b-5p	SRSF1	0.141602	0.00643788
THCA	hsa-miR-10b-5p	SRSF1	-0.169657	0.000127666
THYM	hsa-miR-10b-5p	SRSF1	-0.250295	0.00604341
BLCA	hsa-miR-128-3p	SRSF1	0.354093	2.09e-13
BRCA	hsa-miR-128-3p	SRSF1	0.0975319	0.0014538
CESC	hsa-miR-128-3p	SRSF1	0.260506	4.01e-06
COAD	hsa-miR-128-3p	SRSF1	0.260743	5.69e-08
ESCA	hsa-miR-128-3p	SRSF1	0.21469	0.00640674
LGG	hsa-miR-128-3p	SRSF1	-0.368186	3.1e-18
LIHC	hsa-miR-128-3p	SRSF1	0.120576	0.0208622
LUAD	hsa-miR-128-3p	SRSF1	0.311967	7.73e-13
LUSC	hsa-miR-128-3p	SRSF1	0.29845	5.32e-11
OV	hsa-miR-128-3p	SRSF1	0.233593	5.76e-06
PRAD	hsa-miR-128-3p	SRSF1	0.144556	0.0013493
READ	hsa-miR-128-3p	SRSF1	0.162835	0.0450283
SARC	hsa-miR-128-3p	SRSF1	0.21313	0.000568024
STAD	hsa-miR-128-3p	SRSF1	0.456485	2.16e-20
THCA	hsa-miR-128-3p	SRSF1	0.316276	3.4e-13
THYM	hsa-miR-128-3p	SRSF1	0.699642	8.63e-19
UCEC	hsa-miR-128-3p	SRSF1	0.324773	3.08e-14
KICH	hsa-miR-136-5p	SRSF1	0.393732	0.00128698
LAML	hsa-miR-136-5p	SRSF1	-0.211084	0.0105429
LGG	hsa-miR-136-5p	SRSF1	-0.251153	5.76e-09
LIHC	hsa-miR-136-5p	SRSF1	0.144702	0.0054817
OV	hsa-miR-136-5p	SRSF1	0.110625	0.0336412
PRAD	hsa-miR-136-5p	SRSF1	-0.131762	0.00351179
SKCM	hsa-miR-136-5p	SRSF1	0.145731	0.00196199
UCS	hsa-miR-136-5p	SRSF1	-0.444662	0.0006708
BRCA	hsa-miR-139-5p	SRSF1	-0.0983573	0.00132354
COAD	hsa-miR-139-5p	SRSF1	-0.141129	0.00371196
ESCA	hsa-miR-139-5p	SRSF1	-0.166042	0.0358696
KIRC	hsa-miR-139-5p	SRSF1	0.154379	0.000552938
LGG	hsa-miR-139-5p	SRSF1	-0.382453	1.16e-19
LIHC	hsa-miR-139-5p	SRSF1	-0.36069	1.02e-12
LUSC	hsa-miR-139-5p	SRSF1	-0.0933821	0.0443804
PCPG	hsa-miR-139-5p	SRSF1	0.163004	0.0279046
PRAD	hsa-miR-139-5p	SRSF1	-0.234446	1.57e-07
STAD	hsa-miR-139-5p	SRSF1	-0.198133	0.000127546
THCA	hsa-miR-139-5p	SRSF1	0.0905942	0.0418515
UCEC	hsa-miR-139-5p	SRSF1	-0.120361	0.00599521
DLBC	hsa-miR-153-3p	SRSF1	-0.345094	0.0175191
LGG	hsa-miR-153-3p	SRSF1	-0.12888	0.00315048
PAAD	hsa-miR-153-3p	SRSF1	-0.181959	0.015354
PRAD	hsa-miR-153-3p	SRSF1	-0.146362	0.00117139
THCA	hsa-miR-153-3p	SRSF1	0.178169	5.67e-05
BRCA	hsa-miR-155-5p	SRSF1	0.113971	0.000196367
HNSC	hsa-miR-155-5p	SRSF1	0.182434	4.61e-05
KICH	hsa-miR-155-5p	SRSF1	0.399993	0.00105757
KIRC	hsa-miR-155-5p	SRSF1	0.114752	0.0104599
LIHC	hsa-miR-155-5p	SRSF1	0.229718	8.78e-06
PAAD	hsa-miR-155-5p	SRSF1	0.3325	6.14e-06
PCPG	hsa-miR-155-5p	SRSF1	-0.215284	0.00351578
READ	hsa-miR-155-5p	SRSF1	0.163735	0.0438392
STAD	hsa-miR-155-5p	SRSF1	0.160642	0.00196487
UVM	hsa-miR-155-5p	SRSF1	0.37152	0.000691343
BLCA	hsa-miR-15a-5p	SRSF1	0.183888	0.000198424
COAD	hsa-miR-15a-5p	SRSF1	0.172189	0.000386602
DLBC	hsa-miR-15a-5p	SRSF1	0.579216	1.99e-05
ESCA	hsa-miR-15a-5p	SRSF1	0.405626	1.03e-07
HNSC	hsa-miR-15a-5p	SRSF1	0.213481	1.72e-06
KIRC	hsa-miR-15a-5p	SRSF1	0.137791	0.00207833
KIRP	hsa-miR-15a-5p	SRSF1	-0.131399	0.0268139
LGG	hsa-miR-15a-5p	SRSF1	0.0999574	0.0222423
LIHC	hsa-miR-15a-5p	SRSF1	0.159873	0.00212589
LUAD	hsa-miR-15a-5p	SRSF1	0.0966457	0.0300535
LUSC	hsa-miR-15a-5p	SRSF1	0.334111	1.46e-13
MESO	hsa-miR-15a-5p	SRSF1	0.288167	0.00713294
OV	hsa-miR-15a-5p	SRSF1	0.245278	1.85e-06
PRAD	hsa-miR-15a-5p	SRSF1	0.137617	0.00228919
SKCM	hsa-miR-15a-5p	SRSF1	0.236925	3.8e-07
STAD	hsa-miR-15a-5p	SRSF1	0.395184	3.05e-15
THCA	hsa-miR-15a-5p	SRSF1	0.191767	1.43e-05
THYM	hsa-miR-15a-5p	SRSF1	0.611201	1.56e-13
UCEC	hsa-miR-15a-5p	SRSF1	0.212706	9.84e-07
UCS	hsa-miR-15a-5p	SRSF1	0.311825	0.0204737
UVM	hsa-miR-15a-5p	SRSF1	0.372588	0.000665276
ACC	hsa-miR-15b-5p	SRSF1	0.355996	0.00138
BLCA	hsa-miR-15b-5p	SRSF1	0.297079	1.07e-09
BRCA	hsa-miR-15b-5p	SRSF1	0.219026	5.18e-13
CESC	hsa-miR-15b-5p	SRSF1	0.203762	0.000341521
COAD	hsa-miR-15b-5p	SRSF1	0.165104	0.000671531
ESCA	hsa-miR-15b-5p	SRSF1	0.376271	9.41e-07
HNSC	hsa-miR-15b-5p	SRSF1	0.343683	4.09e-15
LAML	hsa-miR-15b-5p	SRSF1	0.288939	0.000404699
LGG	hsa-miR-15b-5p	SRSF1	0.155006	0.000373805
LIHC	hsa-miR-15b-5p	SRSF1	0.410928	2.2e-16
LUAD	hsa-miR-15b-5p	SRSF1	0.183331	3.46e-05
LUSC	hsa-miR-15b-5p	SRSF1	0.323774	8.74e-13
MESO	hsa-miR-15b-5p	SRSF1	0.240605	0.0256467
OV	hsa-miR-15b-5p	SRSF1	0.23164	6.93e-06
PRAD	hsa-miR-15b-5p	SRSF1	0.22958	2.86e-07
SARC	hsa-miR-15b-5p	SRSF1	0.317681	1.85e-07
SKCM	hsa-miR-15b-5p	SRSF1	0.111119	0.0185072
STAD	hsa-miR-15b-5p	SRSF1	0.368483	2.61e-13
TGCT	hsa-miR-15b-5p	SRSF1	0.301868	0.00013495
THYM	hsa-miR-15b-5p	SRSF1	0.554194	6.22e-11
UCEC	hsa-miR-15b-5p	SRSF1	0.198662	5e-06
BLCA	hsa-miR-183-3p	SRSF1	0.243073	7.38e-07
BRCA	hsa-miR-183-3p	SRSF1	0.172127	1.63e-08
CESC	hsa-miR-183-3p	SRSF1	0.119733	0.0366194
ESCA	hsa-miR-183-3p	SRSF1	0.167354	0.0344107
HNSC	hsa-miR-183-3p	SRSF1	0.0923469	0.0404025
KIRC	hsa-miR-183-3p	SRSF1	-0.123308	0.00591308
LGG	hsa-miR-183-3p	SRSF1	0.175235	5.6e-05
LIHC	hsa-miR-183-3p	SRSF1	0.17607	0.000704001
LUSC	hsa-miR-183-3p	SRSF1	0.13436	0.00373695
MESO	hsa-miR-183-3p	SRSF1	0.230501	0.0327498
PCPG	hsa-miR-183-3p	SRSF1	-0.217024	0.00325266
PRAD	hsa-miR-183-3p	SRSF1	0.130438	0.00385983
SARC	hsa-miR-183-3p	SRSF1	0.23261	0.000163273
STAD	hsa-miR-183-3p	SRSF1	0.191369	0.000217439
BLCA	hsa-miR-195-5p	SRSF1	-0.0986848	0.0471777
BRCA	hsa-miR-195-5p	SRSF1	-0.0661034	0.0311592
COAD	hsa-miR-195-5p	SRSF1	-0.0963307	0.0482386
ESCA	hsa-miR-195-5p	SRSF1	-0.275157	0.000429229
LUAD	hsa-miR-195-5p	SRSF1	-0.130553	0.00332245
LUSC	hsa-miR-195-5p	SRSF1	-0.119787	0.00980506
OV	hsa-miR-195-5p	SRSF1	0.186081	0.000325882
SARC	hsa-miR-195-5p	SRSF1	0.154641	0.012889
STAD	hsa-miR-195-5p	SRSF1	-0.351798	3.44e-12
THYM	hsa-miR-195-5p	SRSF1	-0.189609	0.0388915
UCEC	hsa-miR-195-5p	SRSF1	-0.195307	7.25e-06
UVM	hsa-miR-195-5p	SRSF1	0.241887	0.0306439
ACC	hsa-miR-202-5p	SRSF1	0.224091	0.0485724
BRCA	hsa-miR-202-5p	SRSF1	-0.0702174	0.0220516
HNSC	hsa-miR-202-5p	SRSF1	0.104968	0.0197426
OV	hsa-miR-202-5p	SRSF1	0.144162	0.00553085
PRAD	hsa-miR-202-5p	SRSF1	-0.111229	0.0138552
READ	hsa-miR-202-5p	SRSF1	0.222708	0.00581942
STAD	hsa-miR-202-5p	SRSF1	-0.114998	0.0271833
BLCA	hsa-miR-216a-3p	SRSF1	0.132688	0.00749817
COAD	hsa-miR-216a-3p	SRSF1	0.0977043	0.0451173
LGG	hsa-miR-216a-3p	SRSF1	0.119923	0.00603479
LIHC	hsa-miR-216a-3p	SRSF1	-0.123624	0.0178214
LUAD	hsa-miR-216a-3p	SRSF1	0.118139	0.00793271
PAAD	hsa-miR-216a-3p	SRSF1	-0.471809	3.38e-11
READ	hsa-miR-216a-3p	SRSF1	0.254503	0.00155571
THCA	hsa-miR-216a-3p	SRSF1	0.138659	0.00178805
UCEC	hsa-miR-216a-3p	SRSF1	0.127684	0.00353889
BLCA	hsa-miR-25-5p	SRSF1	0.328766	1.16e-11
BRCA	hsa-miR-25-5p	SRSF1	0.198688	6.34e-11
COAD	hsa-miR-25-5p	SRSF1	0.223044	3.81e-06
ESCA	hsa-miR-25-5p	SRSF1	0.296605	0.00013985
HNSC	hsa-miR-25-5p	SRSF1	0.292147	3.71e-11
LGG	hsa-miR-25-5p	SRSF1	0.305617	9.06e-13
LIHC	hsa-miR-25-5p	SRSF1	0.211705	4.35e-05
LUAD	hsa-miR-25-5p	SRSF1	0.199174	6.62e-06
LUSC	hsa-miR-25-5p	SRSF1	0.176542	0.000132033
OV	hsa-miR-25-5p	SRSF1	0.182422	0.000428425
PRAD	hsa-miR-25-5p	SRSF1	0.15745	0.000474682
READ	hsa-miR-25-5p	SRSF1	0.263075	0.00105846
SARC	hsa-miR-25-5p	SRSF1	0.159952	0.0100728
STAD	hsa-miR-25-5p	SRSF1	0.290568	1.3e-08
THYM	hsa-miR-25-5p	SRSF1	0.682132	1.33e-17
UCEC	hsa-miR-25-5p	SRSF1	0.109111	0.01279
BLCA	hsa-miR-27a-3p	SRSF1	-0.110153	0.0266443
CESC	hsa-miR-27a-3p	SRSF1	-0.155905	0.00636644
DLBC	hsa-miR-27a-3p	SRSF1	-0.463545	0.00103262
LAML	hsa-miR-27a-3p	SRSF1	-0.195	0.0183428
LGG	hsa-miR-27a-3p	SRSF1	-0.133742	0.00217654
LIHC	hsa-miR-27a-3p	SRSF1	0.221098	1.92e-05
OV	hsa-miR-27a-3p	SRSF1	0.163874	0.00158518
PCPG	hsa-miR-27a-3p	SRSF1	-0.163939	0.0270083
PRAD	hsa-miR-27a-3p	SRSF1	-0.135734	0.00263153
TGCT	hsa-miR-27a-3p	SRSF1	-0.184418	0.021611
THYM	hsa-miR-27a-3p	SRSF1	-0.282087	0.00188297
UVM	hsa-miR-27a-3p	SRSF1	0.244466	0.0288573
ESCA	hsa-miR-27b-3p	SRSF1	-0.170434	0.0311834
HNSC	hsa-miR-27b-3p	SRSF1	0.121142	0.00708354
KIRP	hsa-miR-27b-3p	SRSF1	0.168627	0.00437672
LGG	hsa-miR-27b-3p	SRSF1	-0.297855	3.55e-12
LUAD	hsa-miR-27b-3p	SRSF1	-0.0879977	0.0483282
OV	hsa-miR-27b-3p	SRSF1	0.118331	0.0230049
PAAD	hsa-miR-27b-3p	SRSF1	-0.236682	0.00151536
PCPG	hsa-miR-27b-3p	SRSF1	-0.196796	0.00775116
PRAD	hsa-miR-27b-3p	SRSF1	-0.257965	7.12e-09
SARC	hsa-miR-27b-3p	SRSF1	0.152269	0.0143563
SKCM	hsa-miR-27b-3p	SRSF1	0.112377	0.0172123
STAD	hsa-miR-27b-3p	SRSF1	-0.115392	0.0266577
TGCT	hsa-miR-27b-3p	SRSF1	-0.316599	5.98e-05
THCA	hsa-miR-27b-3p	SRSF1	0.25026	1.19e-08
THYM	hsa-miR-27b-3p	SRSF1	-0.24146	0.00815764
BRCA	hsa-miR-28-3p	SRSF1	0.0618757	0.0437022
COAD	hsa-miR-28-3p	SRSF1	-0.121403	0.0126741
HNSC	hsa-miR-28-3p	SRSF1	0.165681	0.000219944
KICH	hsa-miR-28-3p	SRSF1	0.286064	0.0219335
LGG	hsa-miR-28-3p	SRSF1	-0.146797	0.000758923
PAAD	hsa-miR-28-3p	SRSF1	0.200868	0.00734423
SKCM	hsa-miR-28-3p	SRSF1	-0.196187	2.84e-05
STAD	hsa-miR-28-3p	SRSF1	-0.151355	0.00356407
TGCT	hsa-miR-28-3p	SRSF1	-0.269637	0.000691699
THYM	hsa-miR-28-3p	SRSF1	0.35817	6.35e-05
UVM	hsa-miR-28-3p	SRSF1	-0.463652	1.48e-05
ACC	hsa-miR-31-5p	SRSF1	0.23959	0.0346248
BRCA	hsa-miR-31-5p	SRSF1	0.111248	0.00027893
CESC	hsa-miR-31-5p	SRSF1	-0.11571	0.0434589
DLBC	hsa-miR-31-5p	SRSF1	-0.29809	0.0418412
HNSC	hsa-miR-31-5p	SRSF1	-0.0938625	0.0372151
KIRP	hsa-miR-31-5p	SRSF1	0.221149	0.000171928
LGG	hsa-miR-31-5p	SRSF1	-0.195368	6.77e-06
LIHC	hsa-miR-31-5p	SRSF1	0.249724	1.27e-06
MESO	hsa-miR-31-5p	SRSF1	0.239172	0.0265667
STAD	hsa-miR-31-5p	SRSF1	0.112994	0.0299965
TGCT	hsa-miR-31-5p	SRSF1	0.248641	0.00181071
THCA	hsa-miR-31-5p	SRSF1	0.179695	4.88e-05
CHOL	hsa-miR-330-3p	SRSF1	0.358653	0.0317131
DLBC	hsa-miR-330-3p	SRSF1	-0.391449	0.00651055
HNSC	hsa-miR-330-3p	SRSF1	0.0958019	0.0334499
LGG	hsa-miR-330-3p	SRSF1	-0.33247	5.79e-15
LIHC	hsa-miR-330-3p	SRSF1	0.253054	9.04e-07
PCPG	hsa-miR-330-3p	SRSF1	-0.245224	0.000848234
SARC	hsa-miR-330-3p	SRSF1	0.137318	0.0274255
STAD	hsa-miR-330-3p	SRSF1	0.17995	0.000513934
THCA	hsa-miR-330-3p	SRSF1	0.162354	0.000248551
UCEC	hsa-miR-330-3p	SRSF1	0.100906	0.0213714
KIRC	hsa-miR-338-5p	SRSF1	0.13748	0.00212774
LGG	hsa-miR-338-5p	SRSF1	-0.274651	1.67e-10
LIHC	hsa-miR-338-5p	SRSF1	0.174094	0.000809851
LUAD	hsa-miR-338-5p	SRSF1	-0.131936	0.00300144
MESO	hsa-miR-338-5p	SRSF1	0.266075	0.0132797
PAAD	hsa-miR-338-5p	SRSF1	-0.239196	0.00134394
READ	hsa-miR-338-5p	SRSF1	-0.201861	0.0126351
STAD	hsa-miR-338-5p	SRSF1	0.176454	0.000662044
THCA	hsa-miR-338-5p	SRSF1	0.321417	1.34e-13
UCEC	hsa-miR-338-5p	SRSF1	0.106983	0.0146576
ACC	hsa-miR-33a-3p	SRSF1	0.228816	0.0439004
BLCA	hsa-miR-33a-3p	SRSF1	0.153497	0.001949
BRCA	hsa-miR-33a-3p	SRSF1	0.170906	2.06e-08
CESC	hsa-miR-33a-3p	SRSF1	0.114573	0.0455761
COAD	hsa-miR-33a-3p	SRSF1	0.161384	0.000889659
ESCA	hsa-miR-33a-3p	SRSF1	0.18827	0.0171194
HNSC	hsa-miR-33a-3p	SRSF1	0.213528	1.72e-06
KIRP	hsa-miR-33a-3p	SRSF1	0.13903	0.0190759
LGG	hsa-miR-33a-3p	SRSF1	-0.187392	1.61e-05
LUSC	hsa-miR-33a-3p	SRSF1	0.170074	0.000232805
MESO	hsa-miR-33a-3p	SRSF1	-0.225741	0.0366299
OV	hsa-miR-33a-3p	SRSF1	0.190947	0.000224666
SARC	hsa-miR-33a-3p	SRSF1	0.152377	0.0142868
SKCM	hsa-miR-33a-3p	SRSF1	0.116168	0.0137765
STAD	hsa-miR-33a-3p	SRSF1	0.256723	5.77e-07
THCA	hsa-miR-33a-3p	SRSF1	0.160973	0.000281044
THYM	hsa-miR-33a-3p	SRSF1	0.273048	0.00266046
UCS	hsa-miR-33a-3p	SRSF1	0.312293	0.0202753
LIHC	hsa-miR-34b-3p	SRSF1	0.120402	0.0210492
THCA	hsa-miR-34b-3p	SRSF1	0.0991601	0.0258593
THYM	hsa-miR-34b-3p	SRSF1	-0.362971	4.97e-05
UCEC	hsa-miR-34b-3p	SRSF1	-0.111228	0.0111437
COAD	hsa-miR-34c-3p	SRSF1	-0.140639	0.0038343
DLBC	hsa-miR-34c-3p	SRSF1	-0.305821	0.0365706
KICH	hsa-miR-34c-3p	SRSF1	0.314385	0.0114058
LIHC	hsa-miR-34c-3p	SRSF1	0.168139	0.00122437
LUAD	hsa-miR-34c-3p	SRSF1	-0.107543	0.0157198
TGCT	hsa-miR-34c-3p	SRSF1	0.192671	0.0163118
THYM	hsa-miR-34c-3p	SRSF1	-0.314766	0.000489379
ACC	hsa-miR-362-5p	SRSF1	-0.475704	1.07e-05
CESC	hsa-miR-362-5p	SRSF1	0.137946	0.0159187
HNSC	hsa-miR-362-5p	SRSF1	0.130374	0.00373389
KIRC	hsa-miR-362-5p	SRSF1	-0.162222	0.000281816
KIRP	hsa-miR-362-5p	SRSF1	-0.329581	1.27e-08
LGG	hsa-miR-362-5p	SRSF1	-0.15839	0.000276287
LIHC	hsa-miR-362-5p	SRSF1	-0.148032	0.00448475
LUAD	hsa-miR-362-5p	SRSF1	-0.118436	0.00777577
PCPG	hsa-miR-362-5p	SRSF1	-0.221671	0.0026349
STAD	hsa-miR-362-5p	SRSF1	0.169256	0.00109913
THCA	hsa-miR-362-5p	SRSF1	-0.340623	3.48e-15
BRCA	hsa-miR-370-5p	SRSF1	-0.128444	2.67e-05
KICH	hsa-miR-370-5p	SRSF1	0.293684	0.0185046
KIRP	hsa-miR-370-5p	SRSF1	-0.126253	0.0334377
LGG	hsa-miR-370-5p	SRSF1	-0.331897	6.49e-15
LIHC	hsa-miR-370-5p	SRSF1	0.189455	0.000262075
PCPG	hsa-miR-370-5p	SRSF1	-0.159547	0.0314469
PRAD	hsa-miR-370-5p	SRSF1	-0.0974562	0.0311854
SKCM	hsa-miR-370-5p	SRSF1	0.100539	0.0331849
TGCT	hsa-miR-370-5p	SRSF1	0.181393	0.0238949
THCA	hsa-miR-370-5p	SRSF1	-0.0997342	0.0250076
UCS	hsa-miR-370-5p	SRSF1	-0.309575	0.0214509
KICH	hsa-miR-377-3p	SRSF1	0.399038	0.00108999
LAML	hsa-miR-377-3p	SRSF1	-0.217393	0.00839412
LGG	hsa-miR-377-3p	SRSF1	-0.240061	2.72e-08
LIHC	hsa-miR-377-3p	SRSF1	0.18933	0.000264581
MESO	hsa-miR-377-3p	SRSF1	0.218161	0.0436001
PAAD	hsa-miR-377-3p	SRSF1	-0.211791	0.00465615
PRAD	hsa-miR-377-3p	SRSF1	-0.201638	7e-06
SKCM	hsa-miR-377-3p	SRSF1	0.141872	0.00258601
TGCT	hsa-miR-377-3p	SRSF1	0.167976	0.0366875
UCS	hsa-miR-377-3p	SRSF1	-0.41146	0.00180311
BRCA	hsa-miR-377-5p	SRSF1	-0.185766	1.04e-09
KICH	hsa-miR-377-5p	SRSF1	0.362096	0.00328055
LGG	hsa-miR-377-5p	SRSF1	-0.314466	1.81e-13
LIHC	hsa-miR-377-5p	SRSF1	0.164569	0.00155866
PCPG	hsa-miR-377-5p	SRSF1	-0.224708	0.00229082
PRAD	hsa-miR-377-5p	SRSF1	-0.251986	1.61e-08
SARC	hsa-miR-377-5p	SRSF1	-0.206384	0.000853338
STAD	hsa-miR-377-5p	SRSF1	-0.256274	6.05e-07
THCA	hsa-miR-377-5p	SRSF1	-0.0909511	0.0410481
UCS	hsa-miR-377-5p	SRSF1	-0.350473	0.00870951
BRCA	hsa-miR-381-3p	SRSF1	-0.219094	5.09e-13
HNSC	hsa-miR-381-3p	SRSF1	-0.113802	0.0114509
KICH	hsa-miR-381-3p	SRSF1	0.394889	0.0012415
LGG	hsa-miR-381-3p	SRSF1	-0.30459	1.09e-12
LIHC	hsa-miR-381-3p	SRSF1	0.160718	0.00201165
PAAD	hsa-miR-381-3p	SRSF1	-0.176116	0.0190359
PCPG	hsa-miR-381-3p	SRSF1	-0.148136	0.0459648
PRAD	hsa-miR-381-3p	SRSF1	-0.167054	0.000206627
SARC	hsa-miR-381-3p	SRSF1	-0.136905	0.0278991
TGCT	hsa-miR-381-3p	SRSF1	0.255666	0.00132374
UCEC	hsa-miR-381-3p	SRSF1	0.097141	0.0267556
UCS	hsa-miR-381-3p	SRSF1	-0.386576	0.00355301
BRCA	hsa-miR-382-5p	SRSF1	-0.102471	0.000820455
KICH	hsa-miR-382-5p	SRSF1	0.377546	0.00210127
LAML	hsa-miR-382-5p	SRSF1	-0.181229	0.0285872
LGG	hsa-miR-382-5p	SRSF1	-0.313939	2e-13
LIHC	hsa-miR-382-5p	SRSF1	0.157462	0.00248513
SARC	hsa-miR-382-5p	SRSF1	-0.15868	0.0106923
THCA	hsa-miR-382-5p	SRSF1	-0.089753	0.0437979
UCS	hsa-miR-382-5p	SRSF1	-0.334474	0.0125641
BLCA	hsa-miR-421	SRSF1	0.298076	9.37e-10
BRCA	hsa-miR-421	SRSF1	0.142515	3.09e-06
COAD	hsa-miR-421	SRSF1	0.194399	5.94e-05
ESCA	hsa-miR-421	SRSF1	0.321716	3.35e-05
HNSC	hsa-miR-421	SRSF1	0.0960151	0.0330566
KIRP	hsa-miR-421	SRSF1	-0.163914	0.00562465
LGG	hsa-miR-421	SRSF1	-0.277358	1.08e-10
LIHC	hsa-miR-421	SRSF1	0.28421	3.01e-08
LUAD	hsa-miR-421	SRSF1	0.260902	2.75e-09
LUSC	hsa-miR-421	SRSF1	0.22601	8.7e-07
OV	hsa-miR-421	SRSF1	0.228744	9.08e-06
PCPG	hsa-miR-421	SRSF1	-0.274242	0.000179446
READ	hsa-miR-421	SRSF1	0.310398	9.95e-05
SARC	hsa-miR-421	SRSF1	0.233563	0.000153181
STAD	hsa-miR-421	SRSF1	0.248674	1.32e-06
TGCT	hsa-miR-421	SRSF1	0.19588	0.0145798
THCA	hsa-miR-421	SRSF1	0.0999644	0.024673
THYM	hsa-miR-421	SRSF1	0.425191	1.43e-06
UCEC	hsa-miR-421	SRSF1	0.186766	1.82e-05
BLCA	hsa-miR-423-5p	SRSF1	0.221181	7.02e-06
BRCA	hsa-miR-423-5p	SRSF1	0.130559	1.95e-05
CESC	hsa-miR-423-5p	SRSF1	0.129685	0.0235054
ESCA	hsa-miR-423-5p	SRSF1	0.412487	5.96e-08
HNSC	hsa-miR-423-5p	SRSF1	0.223386	5.42e-07
KICH	hsa-miR-423-5p	SRSF1	0.292671	0.0189321
KIRP	hsa-miR-423-5p	SRSF1	0.14913	0.011863
LGG	hsa-miR-423-5p	SRSF1	0.131452	0.00259458
LIHC	hsa-miR-423-5p	SRSF1	0.323501	2.19e-10
LUSC	hsa-miR-423-5p	SRSF1	0.220755	1.57e-06
SARC	hsa-miR-423-5p	SRSF1	0.243469	7.77e-05
SKCM	hsa-miR-423-5p	SRSF1	-0.117943	0.0123868
STAD	hsa-miR-423-5p	SRSF1	0.12241	0.0186579
TGCT	hsa-miR-423-5p	SRSF1	0.169933	0.0345214
UVM	hsa-miR-423-5p	SRSF1	-0.271299	0.0149238
BRCA	hsa-miR-424-5p	SRSF1	0.127026	3.27e-05
COAD	hsa-miR-424-5p	SRSF1	0.127202	0.00897972
ESCA	hsa-miR-424-5p	SRSF1	0.175859	0.0261225
LUSC	hsa-miR-424-5p	SRSF1	-0.157117	0.000682792
PRAD	hsa-miR-424-5p	SRSF1	-0.12487	0.0056912
READ	hsa-miR-424-5p	SRSF1	0.186525	0.0213983
SKCM	hsa-miR-424-5p	SRSF1	0.163016	0.000524672
STAD	hsa-miR-424-5p	SRSF1	0.179588	0.000527673
THCA	hsa-miR-424-5p	SRSF1	0.136552	0.00210193
THYM	hsa-miR-424-5p	SRSF1	0.366972	4.04e-05
UCEC	hsa-miR-424-5p	SRSF1	-0.203776	2.8e-06
UVM	hsa-miR-424-5p	SRSF1	0.239998	0.0320117
BLCA	hsa-miR-425-5p	SRSF1	0.151806	0.00218867
BRCA	hsa-miR-425-5p	SRSF1	0.17586	7.84e-09
CHOL	hsa-miR-425-5p	SRSF1	0.361111	0.0304791
COAD	hsa-miR-425-5p	SRSF1	0.103594	0.0335887
ESCA	hsa-miR-425-5p	SRSF1	0.327994	2.3e-05
HNSC	hsa-miR-425-5p	SRSF1	0.156728	0.000478142
LAML	hsa-miR-425-5p	SRSF1	0.179417	0.0302432
LGG	hsa-miR-425-5p	SRSF1	-0.18884	1.38e-05
LIHC	hsa-miR-425-5p	SRSF1	0.150025	0.00396954
LUSC	hsa-miR-425-5p	SRSF1	0.196817	1.96e-05
OV	hsa-miR-425-5p	SRSF1	0.229327	8.6e-06
READ	hsa-miR-425-5p	SRSF1	0.194286	0.0164648
SKCM	hsa-miR-425-5p	SRSF1	0.209495	7.59e-06
STAD	hsa-miR-425-5p	SRSF1	0.284623	2.63e-08
TGCT	hsa-miR-425-5p	SRSF1	0.303075	0.000126455
UCS	hsa-miR-425-5p	SRSF1	0.387944	0.00342752
BRCA	hsa-miR-455-3p	SRSF1	0.135432	9.39e-06
ESCA	hsa-miR-455-3p	SRSF1	0.192815	0.0145747
KICH	hsa-miR-455-3p	SRSF1	0.42597	0.000449171
KIRP	hsa-miR-455-3p	SRSF1	-0.128369	0.0305616
MESO	hsa-miR-455-3p	SRSF1	0.299603	0.00507188
OV	hsa-miR-455-3p	SRSF1	-0.117432	0.0240737
SKCM	hsa-miR-455-3p	SRSF1	0.174545	0.000201763
STAD	hsa-miR-455-3p	SRSF1	0.16113	0.00190268
THCA	hsa-miR-455-3p	SRSF1	0.183269	3.42e-05
UCEC	hsa-miR-455-3p	SRSF1	-0.0994783	0.0232911
UVM	hsa-miR-455-3p	SRSF1	-0.22155	0.0482643
BRCA	hsa-miR-4668-3p	SRSF1	0.19291	2.27e-10
CESC	hsa-miR-4668-3p	SRSF1	-0.127302	0.0262055
KIRP	hsa-miR-4668-3p	SRSF1	-0.323194	2.51e-08
LAML	hsa-miR-4668-3p	SRSF1	0.184421	0.0258567
LGG	hsa-miR-4668-3p	SRSF1	-0.236817	4.23e-08
LIHC	hsa-miR-4668-3p	SRSF1	0.151219	0.00368702
LUAD	hsa-miR-4668-3p	SRSF1	-0.109543	0.0138728
OV	hsa-miR-4668-3p	SRSF1	0.124956	0.0163238
PCPG	hsa-miR-4668-3p	SRSF1	-0.177381	0.0165961
STAD	hsa-miR-4668-3p	SRSF1	0.175558	0.000705962
THCA	hsa-miR-4668-3p	SRSF1	-0.087631	0.0490485
UCEC	hsa-miR-4668-3p	SRSF1	-0.211195	1.18e-06
UCS	hsa-miR-4668-3p	SRSF1	-0.351619	0.0084778
BLCA	hsa-miR-4724-5p	SRSF1	0.153866	0.00190004
BRCA	hsa-miR-4724-5p	SRSF1	0.159508	1.71e-07
COAD	hsa-miR-4724-5p	SRSF1	0.158815	0.00107664
ESCA	hsa-miR-4724-5p	SRSF1	0.163971	0.0382776
KIRP	hsa-miR-4724-5p	SRSF1	0.171986	0.00364601
LIHC	hsa-miR-4724-5p	SRSF1	0.114696	0.0280191
LUAD	hsa-miR-4724-5p	SRSF1	-0.0886143	0.046772
PAAD	hsa-miR-4724-5p	SRSF1	0.191478	0.0106779
PRAD	hsa-miR-4724-5p	SRSF1	0.103059	0.0226544
STAD	hsa-miR-4724-5p	SRSF1	0.174836	0.000743253
THCA	hsa-miR-4724-5p	SRSF1	-0.191197	1.52e-05
BRCA	hsa-miR-486-5p	SRSF1	-0.0687546	0.0249828
KIRP	hsa-miR-486-5p	SRSF1	-0.243633	3.32e-05
SKCM	hsa-miR-486-5p	SRSF1	-0.105833	0.024922
TGCT	hsa-miR-486-5p	SRSF1	0.245487	0.00207833
ACC	hsa-miR-489-3p	SRSF1	-0.34963	0.00170306
HNSC	hsa-miR-489-3p	SRSF1	-0.0933041	0.0383636
LAML	hsa-miR-489-3p	SRSF1	-0.235167	0.00427277
LIHC	hsa-miR-489-3p	SRSF1	0.155131	0.00288424
OV	hsa-miR-489-3p	SRSF1	0.103258	0.0474696
PAAD	hsa-miR-489-3p	SRSF1	-0.26301	0.000404997
TGCT	hsa-miR-489-3p	SRSF1	0.198241	0.0134097
THCA	hsa-miR-489-3p	SRSF1	-0.187112	2.32e-05
THYM	hsa-miR-489-3p	SRSF1	-0.180866	0.0490159
UCEC	hsa-miR-489-3p	SRSF1	-0.14657	0.000801158
UCS	hsa-miR-489-3p	SRSF1	-0.471842	0.000276222
UVM	hsa-miR-489-3p	SRSF1	0.244846	0.0286016
COAD	hsa-miR-493-5p	SRSF1	-0.119591	0.0140758
KICH	hsa-miR-493-5p	SRSF1	0.394493	0.00125691
LAML	hsa-miR-493-5p	SRSF1	-0.188914	0.0223925
LGG	hsa-miR-493-5p	SRSF1	0.134843	0.00199824
LIHC	hsa-miR-493-5p	SRSF1	0.177437	0.0006384
SKCM	hsa-miR-493-5p	SRSF1	0.12631	0.00736771
THCA	hsa-miR-493-5p	SRSF1	-0.138361	0.00182966
UCS	hsa-miR-493-5p	SRSF1	-0.347752	0.00928137
BRCA	hsa-miR-495-3p	SRSF1	-0.083046	0.00674656
KICH	hsa-miR-495-3p	SRSF1	0.397511	0.00114372
LAML	hsa-miR-495-3p	SRSF1	-0.215463	0.00900605
LGG	hsa-miR-495-3p	SRSF1	-0.383395	9.3e-20
LIHC	hsa-miR-495-3p	SRSF1	0.197211	0.000143223
MESO	hsa-miR-495-3p	SRSF1	0.255653	0.0175126
OV	hsa-miR-495-3p	SRSF1	0.191515	0.000214993
PAAD	hsa-miR-495-3p	SRSF1	-0.163168	0.0300076
SKCM	hsa-miR-495-3p	SRSF1	0.152875	0.00115631
TGCT	hsa-miR-495-3p	SRSF1	0.193997	0.0155754
UCS	hsa-miR-495-3p	SRSF1	-0.369357	0.00551705
DLBC	hsa-miR-497-5p	SRSF1	-0.414956	0.00372923
ESCA	hsa-miR-497-5p	SRSF1	-0.162627	0.0399118
KICH	hsa-miR-497-5p	SRSF1	0.254486	0.0424273
LUAD	hsa-miR-497-5p	SRSF1	-0.190088	1.74e-05
SARC	hsa-miR-497-5p	SRSF1	0.163215	0.00862607
STAD	hsa-miR-497-5p	SRSF1	-0.305068	2.18e-09
THCA	hsa-miR-497-5p	SRSF1	0.122493	0.00584679
UCEC	hsa-miR-497-5p	SRSF1	-0.167189	0.000127975
UVM	hsa-miR-497-5p	SRSF1	0.28039	0.0117632
BLCA	hsa-miR-500a-5p	SRSF1	0.162206	0.00105302
KIRC	hsa-miR-500a-5p	SRSF1	0.183702	3.79e-05
LUSC	hsa-miR-500a-5p	SRSF1	0.119826	0.00978054
PRAD	hsa-miR-500a-5p	SRSF1	-0.176229	8.94e-05
READ	hsa-miR-500a-5p	SRSF1	0.183144	0.023918
STAD	hsa-miR-500a-5p	SRSF1	0.195439	0.000158082
UCS	hsa-miR-500a-5p	SRSF1	-0.271839	0.0446763
BLCA	hsa-miR-505-3p	SRSF1	0.268324	4.16e-08
BRCA	hsa-miR-505-3p	SRSF1	0.175124	9.06e-09
COAD	hsa-miR-505-3p	SRSF1	0.172834	0.000367243
DLBC	hsa-miR-505-3p	SRSF1	-0.313001	0.032178
ESCA	hsa-miR-505-3p	SRSF1	0.244102	0.00186667
HNSC	hsa-miR-505-3p	SRSF1	0.135717	0.00252999
KIRP	hsa-miR-505-3p	SRSF1	-0.128384	0.0305426
LAML	hsa-miR-505-3p	SRSF1	0.239487	0.00359873
LIHC	hsa-miR-505-3p	SRSF1	-0.149788	0.00402768
LUSC	hsa-miR-505-3p	SRSF1	0.213341	3.54e-06
PRAD	hsa-miR-505-3p	SRSF1	-0.18128	5.53e-05
SARC	hsa-miR-505-3p	SRSF1	0.247531	5.84e-05
SKCM	hsa-miR-505-3p	SRSF1	0.193822	3.55e-05
STAD	hsa-miR-505-3p	SRSF1	0.203021	8.58e-05
TGCT	hsa-miR-505-3p	SRSF1	0.216421	0.00683585
BRCA	hsa-miR-508-3p	SRSF1	-0.0685834	0.0253469
KIRC	hsa-miR-508-3p	SRSF1	-0.11843	0.00822066
THYM	hsa-miR-508-3p	SRSF1	-0.202449	0.0272397
ACC	hsa-miR-508-5p	SRSF1	-0.229671	0.0430965
BRCA	hsa-miR-508-5p	SRSF1	-0.0654967	0.0327436
KIRC	hsa-miR-508-5p	SRSF1	-0.130224	0.00363472
THCA	hsa-miR-508-5p	SRSF1	-0.0894972	0.0444045
THYM	hsa-miR-508-5p	SRSF1	-0.244246	0.00742948
BLCA	hsa-miR-542-3p	SRSF1	0.130577	0.0085144
BRCA	hsa-miR-542-3p	SRSF1	-0.189783	4.46e-10
COAD	hsa-miR-542-3p	SRSF1	0.134079	0.00586303
LGG	hsa-miR-542-3p	SRSF1	0.190322	1.17e-05
LUSC	hsa-miR-542-3p	SRSF1	0.110536	0.0172241
OV	hsa-miR-542-3p	SRSF1	0.134029	0.00995135
SKCM	hsa-miR-542-3p	SRSF1	0.0994699	0.0351105
STAD	hsa-miR-542-3p	SRSF1	0.147163	0.00461491
TGCT	hsa-miR-542-3p	SRSF1	-0.172923	0.0314227
THCA	hsa-miR-542-3p	SRSF1	0.210242	1.88e-06
THYM	hsa-miR-542-3p	SRSF1	0.418856	2.13e-06
UVM	hsa-miR-542-3p	SRSF1	0.240561	0.0315987
CHOL	hsa-miR-552-5p	SRSF1	0.335623	0.0453776
ESCA	hsa-miR-552-5p	SRSF1	0.210485	0.00754971
KICH	hsa-miR-552-5p	SRSF1	0.332452	0.00727461
LGG	hsa-miR-552-5p	SRSF1	-0.29884	3e-12
STAD	hsa-miR-552-5p	SRSF1	0.120929	0.0201458
TGCT	hsa-miR-552-5p	SRSF1	-0.16317	0.0424965
THCA	hsa-miR-552-5p	SRSF1	0.107001	0.0161502
CHOL	hsa-miR-582-5p	SRSF1	0.359582	0.031242
HNSC	hsa-miR-582-5p	SRSF1	0.263443	2.85e-09
LGG	hsa-miR-582-5p	SRSF1	-0.27877	8.64e-11
LIHC	hsa-miR-582-5p	SRSF1	0.122125	0.0192646
LUSC	hsa-miR-582-5p	SRSF1	0.12961	0.0051713
OV	hsa-miR-582-5p	SRSF1	0.156119	0.00263637
SARC	hsa-miR-582-5p	SRSF1	0.142707	0.0218577
SKCM	hsa-miR-582-5p	SRSF1	-0.194414	3.36e-05
STAD	hsa-miR-582-5p	SRSF1	0.215476	2.99e-05
THCA	hsa-miR-582-5p	SRSF1	0.17205	0.000102005
THYM	hsa-miR-582-5p	SRSF1	-0.258735	0.00449405
KIRC	hsa-miR-6087	SRSF1	0.115193	0.0101656
LUAD	hsa-miR-6087	SRSF1	0.190548	1.66e-05
LUSC	hsa-miR-6087	SRSF1	0.145797	0.00163862
PCPG	hsa-miR-6087	SRSF1	-0.190165	0.0101319
STAD	hsa-miR-6087	SRSF1	0.214596	3.23e-05
TGCT	hsa-miR-6087	SRSF1	0.230883	0.00384801
THCA	hsa-miR-6087	SRSF1	-0.0914437	0.0399607
UCEC	hsa-miR-6087	SRSF1	0.189257	1.39e-05
BLCA	hsa-miR-6715a-3p	SRSF1	0.126034	0.0111273
COAD	hsa-miR-6715a-3p	SRSF1	0.13264	0.00642019
LUSC	hsa-miR-6715a-3p	SRSF1	-0.0939784	0.0430343
MESO	hsa-miR-6715a-3p	SRSF1	0.228511	0.0343279
PAAD	hsa-miR-6715a-3p	SRSF1	0.172793	0.0214541
PCPG	hsa-miR-6715a-3p	SRSF1	-0.147365	0.047121
UCS	hsa-miR-6715a-3p	SRSF1	0.281935	0.037036
BLCA	hsa-miR-7-5p	SRSF1	0.18872	0.000133142
BRCA	hsa-miR-7-5p	SRSF1	0.132611	1.44e-05
COAD	hsa-miR-7-5p	SRSF1	0.208601	1.6e-05
ESCA	hsa-miR-7-5p	SRSF1	0.236175	0.0026416
LGG	hsa-miR-7-5p	SRSF1	-0.356373	4.17e-17
LIHC	hsa-miR-7-5p	SRSF1	0.306424	2.03e-09
LUAD	hsa-miR-7-5p	SRSF1	0.21188	1.59e-06
LUSC	hsa-miR-7-5p	SRSF1	0.139197	0.00265628
OV	hsa-miR-7-5p	SRSF1	0.149005	0.00412284
PAAD	hsa-miR-7-5p	SRSF1	-0.216408	0.00381474
PCPG	hsa-miR-7-5p	SRSF1	0.165149	0.0258838
READ	hsa-miR-7-5p	SRSF1	0.304624	0.000135771
SKCM	hsa-miR-7-5p	SRSF1	0.107159	0.0231548
STAD	hsa-miR-7-5p	SRSF1	0.22359	1.45e-05
TGCT	hsa-miR-7-5p	SRSF1	0.526535	1.97e-12
THYM	hsa-miR-7-5p	SRSF1	0.457799	1.65e-07
UCEC	hsa-miR-7-5p	SRSF1	0.096953	0.0270526
UVM	hsa-miR-7-5p	SRSF1	0.245663	0.028058
BLCA	hsa-miR-766-3p	SRSF1	0.159228	0.00130427
BRCA	hsa-miR-766-3p	SRSF1	0.179105	4.1e-09
HNSC	hsa-miR-766-3p	SRSF1	0.0919692	0.0412317
KIRP	hsa-miR-766-3p	SRSF1	-0.117747	0.0474276
LAML	hsa-miR-766-3p	SRSF1	0.182675	0.0273213
LGG	hsa-miR-766-3p	SRSF1	-0.362238	1.16e-17
LIHC	hsa-miR-766-3p	SRSF1	0.180026	0.000529456
LUAD	hsa-miR-766-3p	SRSF1	0.213032	1.39e-06
READ	hsa-miR-766-3p	SRSF1	-0.18209	0.0247535
SARC	hsa-miR-766-3p	SRSF1	0.204171	0.000972502
SKCM	hsa-miR-766-3p	SRSF1	0.111327	0.0182878
STAD	hsa-miR-766-3p	SRSF1	0.139439	0.00730611
TGCT	hsa-miR-766-3p	SRSF1	0.236686	0.00302567
THYM	hsa-miR-766-3p	SRSF1	0.673361	4.87e-17
UVM	hsa-miR-766-3p	SRSF1	0.254115	0.0229314
BLCA	hsa-miR-873-5p	SRSF1	0.105462	0.0338602
COAD	hsa-miR-873-5p	SRSF1	0.157417	0.00119301
HNSC	hsa-miR-873-5p	SRSF1	0.117666	0.00892127
LGG	hsa-miR-873-5p	SRSF1	-0.365305	5.9e-18
LIHC	hsa-miR-873-5p	SRSF1	0.154685	0.00296698
LUAD	hsa-miR-873-5p	SRSF1	0.166163	0.000178844
OV	hsa-miR-873-5p	SRSF1	0.104229	0.0454097
PAAD	hsa-miR-873-5p	SRSF1	-0.203411	0.00661805
PRAD	hsa-miR-873-5p	SRSF1	-0.204334	5.24e-06
TGCT	hsa-miR-873-5p	SRSF1	-0.16328	0.0423551
THCA	hsa-miR-873-5p	SRSF1	0.199041	6.58e-06
THYM	hsa-miR-873-5p	SRSF1	-0.184757	0.0442684
UCEC	hsa-miR-873-5p	SRSF1	0.128212	0.0034033
UVM	hsa-miR-873-5p	SRSF1	-0.237244	0.0340963
ACC	hsa-miR-9-5p	SRSF1	0.313045	0.00526085
BLCA	hsa-miR-9-5p	SRSF1	0.235127	1.71e-06
BRCA	hsa-miR-9-5p	SRSF1	0.132964	1.37e-05
CESC	hsa-miR-9-5p	SRSF1	0.143549	0.0120835
CHOL	hsa-miR-9-5p	SRSF1	-0.398423	0.0160942
COAD	hsa-miR-9-5p	SRSF1	0.0975926	0.0453645
HNSC	hsa-miR-9-5p	SRSF1	0.296838	1.74e-11
KIRP	hsa-miR-9-5p	SRSF1	0.145974	0.0138029
LGG	hsa-miR-9-5p	SRSF1	0.191296	1.06e-05
LUSC	hsa-miR-9-5p	SRSF1	0.197129	1.9e-05
OV	hsa-miR-9-5p	SRSF1	0.113853	0.0287617
PCPG	hsa-miR-9-5p	SRSF1	-0.168062	0.0233408
SARC	hsa-miR-9-5p	SRSF1	0.13436	0.0309708
STAD	hsa-miR-9-5p	SRSF1	0.109118	0.0361498
THYM	hsa-miR-9-5p	SRSF1	-0.201232	0.0281987
BLCA	hsa-miR-124-3p	SRSF9	0.115661	0.0198987
CHOL	hsa-miR-124-3p	SRSF9	-0.416148	0.011588
DLBC	hsa-miR-124-3p	SRSF9	-0.340698	0.0191088
HNSC	hsa-miR-124-3p	SRSF9	0.0941341	0.036667
LGG	hsa-miR-124-3p	SRSF9	-0.329165	1.11e-14
LIHC	hsa-miR-124-3p	SRSF9	0.11067	0.0340556
LUSC	hsa-miR-124-3p	SRSF9	0.14069	0.00238552
MESO	hsa-miR-124-3p	SRSF9	-0.318372	0.00281361
PCPG	hsa-miR-124-3p	SRSF9	0.196479	0.00785248
READ	hsa-miR-124-3p	SRSF9	-0.187543	0.0206863
UCEC	hsa-miR-124-3p	SRSF9	0.0904551	0.0392117
BLCA	hsa-miR-128-3p	SRSF9	0.15011	0.00245569
BRCA	hsa-miR-128-3p	SRSF9	0.064538	0.0353876
CESC	hsa-miR-128-3p	SRSF9	0.289276	2.72e-07
COAD	hsa-miR-128-3p	SRSF9	0.166816	0.000588841
DLBC	hsa-miR-128-3p	SRSF9	-0.331235	0.0229476
ESCA	hsa-miR-128-3p	SRSF9	0.414055	5.25e-08
LGG	hsa-miR-128-3p	SRSF9	-0.362079	1.2e-17
LIHC	hsa-miR-128-3p	SRSF9	0.129475	0.0130509
LUAD	hsa-miR-128-3p	SRSF9	0.314721	4.74e-13
LUSC	hsa-miR-128-3p	SRSF9	0.286503	3.23e-10
OV	hsa-miR-128-3p	SRSF9	0.104438	0.044977
PCPG	hsa-miR-128-3p	SRSF9	-0.146434	0.0485481
PRAD	hsa-miR-128-3p	SRSF9	0.111461	0.0136572
READ	hsa-miR-128-3p	SRSF9	0.186649	0.0213106
SARC	hsa-miR-128-3p	SRSF9	0.268009	1.28e-05
SKCM	hsa-miR-128-3p	SRSF9	0.197904	2.4e-05
STAD	hsa-miR-128-3p	SRSF9	0.349002	5.22e-12
THYM	hsa-miR-128-3p	SRSF9	0.284285	0.00172816
UCEC	hsa-miR-128-3p	SRSF9	0.175048	5.99e-05
UCS	hsa-miR-128-3p	SRSF9	-0.407049	0.0020412
UVM	hsa-miR-128-3p	SRSF9	0.239183	0.0326173
BLCA	hsa-miR-1343-3p	SRSF9	0.101997	0.0402027
CESC	hsa-miR-1343-3p	SRSF9	0.291939	2.09e-07
CHOL	hsa-miR-1343-3p	SRSF9	-0.368442	0.0270311
DLBC	hsa-miR-1343-3p	SRSF9	-0.36584	0.0114429
ESCA	hsa-miR-1343-3p	SRSF9	0.237241	0.00252269
HNSC	hsa-miR-1343-3p	SRSF9	0.139909	0.00184616
KIRC	hsa-miR-1343-3p	SRSF9	0.100735	0.0247168
KIRP	hsa-miR-1343-3p	SRSF9	-0.153482	0.00958407
LGG	hsa-miR-1343-3p	SRSF9	-0.216487	5.78e-07
LUAD	hsa-miR-1343-3p	SRSF9	0.137485	0.00197767
LUSC	hsa-miR-1343-3p	SRSF9	0.129115	0.00534641
PAAD	hsa-miR-1343-3p	SRSF9	0.196312	0.0088243
STAD	hsa-miR-1343-3p	SRSF9	0.235439	4.84e-06
UCEC	hsa-miR-1343-3p	SRSF9	0.138488	0.00154725
UVM	hsa-miR-1343-3p	SRSF9	-0.230077	0.0400614
BRCA	hsa-miR-136-5p	SRSF9	-0.1195	9.4e-05
LGG	hsa-miR-136-5p	SRSF9	-0.171803	7.85e-05
LIHC	hsa-miR-136-5p	SRSF9	0.147482	0.00463722
PRAD	hsa-miR-136-5p	SRSF9	-0.105998	0.0190487
SARC	hsa-miR-136-5p	SRSF9	0.288176	2.52e-06
SKCM	hsa-miR-136-5p	SRSF9	0.153396	0.00111157
TGCT	hsa-miR-136-5p	SRSF9	0.182923	0.0227152
THCA	hsa-miR-136-5p	SRSF9	-0.170628	0.000116593
CESC	hsa-miR-186-5p	SRSF9	0.148593	0.00935353
ESCA	hsa-miR-186-5p	SRSF9	0.192866	0.0145481
KIRP	hsa-miR-186-5p	SRSF9	-0.214179	0.000277149
LAML	hsa-miR-186-5p	SRSF9	0.230629	0.00510061
LGG	hsa-miR-186-5p	SRSF9	0.184075	2.28e-05
LIHC	hsa-miR-186-5p	SRSF9	0.118852	0.0227748
LUAD	hsa-miR-186-5p	SRSF9	0.0916181	0.0397786
LUSC	hsa-miR-186-5p	SRSF9	0.192157	3.09e-05
PAAD	hsa-miR-186-5p	SRSF9	0.252175	0.000708964
SARC	hsa-miR-186-5p	SRSF9	0.124404	0.0459029
SKCM	hsa-miR-186-5p	SRSF9	0.136997	0.00363106
STAD	hsa-miR-186-5p	SRSF9	0.192952	0.000192236
UCEC	hsa-miR-186-5p	SRSF9	0.100671	0.0216776
UCS	hsa-miR-186-5p	SRSF9	0.287547	0.0332786
ACC	hsa-miR-218-5p	SRSF9	0.246963	0.0292732
BRCA	hsa-miR-218-5p	SRSF9	-0.136555	7.9e-06
CESC	hsa-miR-218-5p	SRSF9	0.127749	0.0256791
COAD	hsa-miR-218-5p	SRSF9	-0.104465	0.032118
DLBC	hsa-miR-218-5p	SRSF9	-0.29006	0.0479568
HNSC	hsa-miR-218-5p	SRSF9	0.190548	2.05e-05
LGG	hsa-miR-218-5p	SRSF9	-0.284658	3.31e-11
LIHC	hsa-miR-218-5p	SRSF9	0.182721	0.000434561
LUAD	hsa-miR-218-5p	SRSF9	-0.284753	7.41e-11
PCPG	hsa-miR-218-5p	SRSF9	0.189866	0.0102528
PRAD	hsa-miR-218-5p	SRSF9	-0.182608	4.87e-05
SARC	hsa-miR-218-5p	SRSF9	0.2532	3.88e-05
SKCM	hsa-miR-218-5p	SRSF9	0.156611	0.000868962
STAD	hsa-miR-218-5p	SRSF9	-0.174715	0.000749673
THCA	hsa-miR-218-5p	SRSF9	0.0959487	0.0310984
UCEC	hsa-miR-218-5p	SRSF9	0.101379	0.0207665
UVM	hsa-miR-218-5p	SRSF9	0.342644	0.00186314
DLBC	hsa-miR-328-3p	SRSF9	-0.324279	0.0261652
KIRP	hsa-miR-328-3p	SRSF9	-0.268146	4.58e-06
LGG	hsa-miR-328-3p	SRSF9	-0.286901	2.28e-11
MESO	hsa-miR-328-3p	SRSF9	-0.241427	0.0251313
STAD	hsa-miR-328-3p	SRSF9	0.132005	0.0111408
ACC	hsa-miR-330-3p	SRSF9	0.258663	0.0222176
DLBC	hsa-miR-330-3p	SRSF9	-0.52118	0.000172509
ESCA	hsa-miR-330-3p	SRSF9	0.161736	0.0410285
LAML	hsa-miR-330-3p	SRSF9	-0.200596	0.0151949
LGG	hsa-miR-330-3p	SRSF9	-0.286281	2.53e-11
LIHC	hsa-miR-330-3p	SRSF9	0.155763	0.00277066
PAAD	hsa-miR-330-3p	SRSF9	0.147599	0.0499358
SARC	hsa-miR-330-3p	SRSF9	0.211704	0.000619724
STAD	hsa-miR-330-3p	SRSF9	0.241373	2.73e-06
BLCA	hsa-miR-379-5p	SRSF9	0.102416	0.0393855
BRCA	hsa-miR-379-5p	SRSF9	-0.17053	2.21e-08
CESC	hsa-miR-379-5p	SRSF9	0.120107	0.0360326
CHOL	hsa-miR-379-5p	SRSF9	0.354874	0.0336894
HNSC	hsa-miR-379-5p	SRSF9	-0.10749	0.0169626
KIRC	hsa-miR-379-5p	SRSF9	0.149397	0.000834917
LGG	hsa-miR-379-5p	SRSF9	-0.206273	1.96e-06
LIHC	hsa-miR-379-5p	SRSF9	0.184097	0.000392441
OV	hsa-miR-379-5p	SRSF9	0.125585	0.0157881
PCPG	hsa-miR-379-5p	SRSF9	0.153752	0.0382394
PRAD	hsa-miR-379-5p	SRSF9	-0.12084	0.00746982
SARC	hsa-miR-379-5p	SRSF9	0.284425	3.44e-06
SKCM	hsa-miR-379-5p	SRSF9	0.131485	0.00526319
TGCT	hsa-miR-379-5p	SRSF9	0.194797	0.0151453
THCA	hsa-miR-379-5p	SRSF9	-0.10316	0.0204121
UCS	hsa-miR-379-5p	SRSF9	-0.291497	0.0308283
BRCA	hsa-miR-381-3p	SRSF9	-0.0980785	0.00136628
CESC	hsa-miR-381-3p	SRSF9	0.122355	0.0326709
CHOL	hsa-miR-381-3p	SRSF9	0.385066	0.0203902
HNSC	hsa-miR-381-3p	SRSF9	-0.145517	0.00119508
KIRC	hsa-miR-381-3p	SRSF9	0.166311	0.00019586
LGG	hsa-miR-381-3p	SRSF9	-0.219793	3.84e-07
LIHC	hsa-miR-381-3p	SRSF9	0.192414	0.000208689
OV	hsa-miR-381-3p	SRSF9	0.102362	0.0494372
PCPG	hsa-miR-381-3p	SRSF9	0.155579	0.0359754
PRAD	hsa-miR-381-3p	SRSF9	-0.128081	0.00455772
SARC	hsa-miR-381-3p	SRSF9	0.255339	3.32e-05
SKCM	hsa-miR-381-3p	SRSF9	0.123357	0.00888087
THCA	hsa-miR-381-3p	SRSF9	-0.137065	0.00202116
UCS	hsa-miR-381-3p	SRSF9	-0.447935	0.000605156
LAML	hsa-miR-509-3-5p	SRSF9	-0.263197	0.00132887
LUAD	hsa-miR-509-3-5p	SRSF9	-0.0972501	0.0290347
SARC	hsa-miR-509-3-5p	SRSF9	0.212476	0.000591225
SKCM	hsa-miR-509-3-5p	SRSF9	-0.130388	0.00565767
PAAD	hsa-miR-802	SRSF9	-0.352673	1.48e-06
KICH	hsa-miR-1228-3p	SRSF7	0.477639	6.58e-05
LGG	hsa-miR-1228-3p	SRSF7	-0.18853	1.42e-05
LUSC	hsa-miR-1228-3p	SRSF7	-0.0975694	0.0356361
PCPG	hsa-miR-1228-3p	SRSF7	-0.153131	0.0390368
SKCM	hsa-miR-1228-3p	SRSF7	0.0978181	0.0382727
STAD	hsa-miR-1228-3p	SRSF7	0.127204	0.0144792
TGCT	hsa-miR-1228-3p	SRSF7	-0.202366	0.0115623
BLCA	hsa-miR-124-3p	SRSF7	0.162285	0.00104703
KICH	hsa-miR-124-3p	SRSF7	0.308206	0.0132235
KIRP	hsa-miR-124-3p	SRSF7	-0.197184	0.000834135
LGG	hsa-miR-124-3p	SRSF7	-0.125479	0.00405178
LUAD	hsa-miR-124-3p	SRSF7	0.0993557	0.0257134
MESO	hsa-miR-124-3p	SRSF7	-0.322537	0.00245612
PRAD	hsa-miR-124-3p	SRSF7	0.0946055	0.0364938
READ	hsa-miR-124-3p	SRSF7	-0.280104	0.00047393
UCEC	hsa-miR-124-3p	SRSF7	0.0965099	0.0277638
UCS	hsa-miR-124-3p	SRSF7	0.295745	0.0283632
BLCA	hsa-miR-1254	SRSF7	0.216244	1.13e-05
BRCA	hsa-miR-1254	SRSF7	0.194056	1.77e-10
CESC	hsa-miR-1254	SRSF7	0.119177	0.0375066
ESCA	hsa-miR-1254	SRSF7	0.392101	2.93e-07
HNSC	hsa-miR-1254	SRSF7	0.119979	0.00765693
LGG	hsa-miR-1254	SRSF7	0.171117	8.39e-05
LIHC	hsa-miR-1254	SRSF7	0.195733	0.000160983
LUAD	hsa-miR-1254	SRSF7	0.0877103	0.0490685
LUSC	hsa-miR-1254	SRSF7	0.132538	0.004238
PRAD	hsa-miR-1254	SRSF7	0.14908	0.000943944
SARC	hsa-miR-1254	SRSF7	0.171519	0.00574278
SKCM	hsa-miR-1254	SRSF7	0.169227	0.000315946
STAD	hsa-miR-1254	SRSF7	0.250019	1.15e-06
UCEC	hsa-miR-1254	SRSF7	0.182558	2.81e-05
BLCA	hsa-miR-142-5p	SRSF7	0.170515	0.000568507
BRCA	hsa-miR-142-5p	SRSF7	0.148853	1.09e-06
CHOL	hsa-miR-142-5p	SRSF7	0.530262	0.000879481
HNSC	hsa-miR-142-5p	SRSF7	0.153613	0.000620613
KICH	hsa-miR-142-5p	SRSF7	0.504598	2.12e-05
LIHC	hsa-miR-142-5p	SRSF7	0.28685	2.21e-08
LUAD	hsa-miR-142-5p	SRSF7	0.117362	0.00835582
LUSC	hsa-miR-142-5p	SRSF7	0.131755	0.0044713
MESO	hsa-miR-142-5p	SRSF7	0.22506	0.0372159
PAAD	hsa-miR-142-5p	SRSF7	0.335183	5.11e-06
PCPG	hsa-miR-142-5p	SRSF7	0.164989	0.0260298
PRAD	hsa-miR-142-5p	SRSF7	0.145041	0.00129922
SKCM	hsa-miR-142-5p	SRSF7	0.150091	0.00142477
STAD	hsa-miR-142-5p	SRSF7	0.256299	6.03e-07
THCA	hsa-miR-142-5p	SRSF7	0.160844	0.000284287
THYM	hsa-miR-142-5p	SRSF7	0.458887	1.53e-07
UVM	hsa-miR-142-5p	SRSF7	0.363563	0.000916975
BLCA	hsa-miR-149-3p	SRSF7	0.103297	0.0377132
COAD	hsa-miR-149-3p	SRSF7	-0.19064	8.28e-05
HNSC	hsa-miR-149-3p	SRSF7	0.181754	4.92e-05
KIRP	hsa-miR-149-3p	SRSF7	0.214184	0.00027706
LIHC	hsa-miR-149-3p	SRSF7	0.219958	2.12e-05
PCPG	hsa-miR-149-3p	SRSF7	0.264611	0.000306476
SARC	hsa-miR-149-3p	SRSF7	0.225559	0.000259594
SKCM	hsa-miR-149-3p	SRSF7	0.0985877	0.0367706
TGCT	hsa-miR-149-3p	SRSF7	0.158352	0.0490751
THYM	hsa-miR-149-3p	SRSF7	-0.217755	0.0173607
UCEC	hsa-miR-149-3p	SRSF7	0.192855	9.47e-06
UVM	hsa-miR-149-3p	SRSF7	0.39215	0.000321256
ACC	hsa-miR-154-5p	SRSF7	0.232275	0.040721
BRCA	hsa-miR-154-5p	SRSF7	-0.094392	0.00206454
KICH	hsa-miR-154-5p	SRSF7	0.355235	0.003971
LIHC	hsa-miR-154-5p	SRSF7	0.127841	0.0142543
PAAD	hsa-miR-154-5p	SRSF7	-0.256585	0.000566121
PCPG	hsa-miR-154-5p	SRSF7	0.146398	0.0486039
UCS	hsa-miR-154-5p	SRSF7	-0.382415	0.00396014
ACC	hsa-miR-188-5p	SRSF7	-0.355541	0.00140114
BLCA	hsa-miR-188-5p	SRSF7	0.19562	7.4e-05
BRCA	hsa-miR-188-5p	SRSF7	0.226979	6.91e-14
CESC	hsa-miR-188-5p	SRSF7	0.158766	0.00545285
COAD	hsa-miR-188-5p	SRSF7	0.111557	0.0220619
ESCA	hsa-miR-188-5p	SRSF7	0.190542	0.0158026
HNSC	hsa-miR-188-5p	SRSF7	0.163891	0.000257703
KIRP	hsa-miR-188-5p	SRSF7	-0.287613	8.22e-07
LGG	hsa-miR-188-5p	SRSF7	0.219676	3.9e-07
LUAD	hsa-miR-188-5p	SRSF7	0.16254	0.000247978
LUSC	hsa-miR-188-5p	SRSF7	0.150823	0.00111918
PCPG	hsa-miR-188-5p	SRSF7	-0.262795	0.000338278
SKCM	hsa-miR-188-5p	SRSF7	0.130943	0.00545481
STAD	hsa-miR-188-5p	SRSF7	0.212533	3.86e-05
THCA	hsa-miR-188-5p	SRSF7	-0.218321	7.28e-07
UCEC	hsa-miR-188-5p	SRSF7	0.219572	4.26e-07
UVM	hsa-miR-188-5p	SRSF7	0.28673	0.00991985
BLCA	hsa-miR-216a-5p	SRSF7	0.16945	0.000616228
COAD	hsa-miR-216a-5p	SRSF7	-0.162493	0.000818585
LAML	hsa-miR-216a-5p	SRSF7	0.188895	0.0224066
LGG	hsa-miR-216a-5p	SRSF7	0.106813	0.01453
LIHC	hsa-miR-216a-5p	SRSF7	-0.102698	0.0493104
PAAD	hsa-miR-216a-5p	SRSF7	-0.436012	1.31e-09
THCA	hsa-miR-216a-5p	SRSF7	0.111548	0.0121298
BLCA	hsa-miR-216b-5p	SRSF7	0.180269	0.000265782
LAML	hsa-miR-216b-5p	SRSF7	0.210156	0.0108966
LGG	hsa-miR-216b-5p	SRSF7	0.159165	0.000257605
LUAD	hsa-miR-216b-5p	SRSF7	0.147944	0.000863999
OV	hsa-miR-216b-5p	SRSF7	0.129683	0.0126595
PAAD	hsa-miR-216b-5p	SRSF7	-0.389708	8.25e-08
UCEC	hsa-miR-216b-5p	SRSF7	0.125944	0.00402103
ACC	hsa-miR-24-3p	SRSF7	0.282253	0.012291
BRCA	hsa-miR-24-3p	SRSF7	0.132321	1.5e-05
[truncated: 718 more rows]
