# Supplementary material for: Molecular characteristics and clinical implications of serine/arginine-rich splicing factors in human cancer
Source: Aging (Albany NY). 2023 Nov 24;15(22):13287–311. doi: 10.18632/aging.205241 (PMC10713412; doi:10.18632/aging.205241)
Supplement: Supplementary Table 3 [file aging-15-205241-s004.xls]

## Sheet: Table S3
Supplementary Table 3. The association between miRNAs and SRSFs in specific cancer types through more stringent criteria.
Cancer types	miRNA	Target gene	cor	pvalue
BLCA	hsa-miR-200a-3p	SRSF10	0.257291	1.51655e-07
CESC	hsa-miR-200a-3p	SRSF10	0.293794	1.73594e-07
ESCA	hsa-miR-200a-3p	SRSF10	0.263426	0.000763709
HNSC	hsa-miR-200a-3p	SRSF10	0.270673	1.00219e-09
KIRP	hsa-miR-200a-3p	SRSF10	0.272909	3.04481e-06
LUSC	hsa-miR-200a-3p	SRSF10	0.40408	1.18631e-19
MESO	hsa-miR-200a-3p	SRSF10	0.398203	0.000146429
STAD	hsa-miR-200a-3p	SRSF10	0.304515	2.34203e-09
TGCT	hsa-miR-200a-3p	SRSF10	-0.418937	5.79025e-08
THCA	hsa-miR-200a-3p	SRSF10	0.300211	5.60919e-12
THYM	hsa-miR-200a-3p	SRSF10	-0.282895	0.00182462
UVM	hsa-miR-200a-3p	SRSF10	0.426452	8.00087e-05
ACC	hsa-miR-22-3p	SRSF10	-0.297936	0.00806647
DLBC	hsa-miR-22-3p	SRSF10	-0.30472	0.0372862
ESCA	hsa-miR-22-3p	SRSF10	-0.363882	2.2467e-06
KICH	hsa-miR-22-3p	SRSF10	-0.267275	0.0327556
KIRP	hsa-miR-22-3p	SRSF10	-0.407051	9.25859e-13
LAML	hsa-miR-22-3p	SRSF10	-0.321109	7.75654e-05
LIHC	hsa-miR-22-3p	SRSF10	-0.362764	7.41205e-13
LUAD	hsa-miR-22-3p	SRSF10	-0.260053	3.10527e-09
LUSC	hsa-miR-22-3p	SRSF10	-0.283722	4.8642e-10
SKCM	hsa-miR-22-3p	SRSF10	-0.265629	1.09125e-08
ACC	hsa-miR-106b-5p	SRSF2	0.371974	0.000798426
BLCA	hsa-miR-106b-5p	SRSF2	0.404448	2.26729e-17
BRCA	hsa-miR-106b-5p	SRSF2	0.403668	6.32428e-43
CHOL	hsa-miR-106b-5p	SRSF2	0.638928	2.74216e-05
COAD	hsa-miR-106b-5p	SRSF2	0.284035	2.97058e-09
ESCA	hsa-miR-106b-5p	SRSF2	0.386971	4.30856e-07
HNSC	hsa-miR-106b-5p	SRSF2	0.29969	1.09002e-11
KICH	hsa-miR-106b-5p	SRSF2	0.266756	0.0331084
LGG	hsa-miR-106b-5p	SRSF2	0.26665	5.79165e-10
LIHC	hsa-miR-106b-5p	SRSF2	0.461423	9.47217e-21
LUAD	hsa-miR-106b-5p	SRSF2	0.28254	1.05164e-10
LUSC	hsa-miR-106b-5p	SRSF2	0.398726	3.92489e-19
SARC	hsa-miR-106b-5p	SRSF2	0.364964	1.50834e-09
SKCM	hsa-miR-106b-5p	SRSF2	0.310062	1.84161e-11
STAD	hsa-miR-106b-5p	SRSF2	0.346331	7.747e-12
THYM	hsa-miR-106b-5p	SRSF2	0.557539	4.51087e-11
ACC	hsa-miR-17-5p	SRSF2	0.326579	0.00352099
BLCA	hsa-miR-17-5p	SRSF2	0.396623	1.04028e-16
BRCA	hsa-miR-17-5p	SRSF2	0.347543	1.53913e-31
CHOL	hsa-miR-17-5p	SRSF2	0.526057	0.000983207
COAD	hsa-miR-17-5p	SRSF2	0.280909	4.48745e-09
DLBC	hsa-miR-17-5p	SRSF2	0.379814	0.00845744
ESCA	hsa-miR-17-5p	SRSF2	0.338093	1.22826e-05
HNSC	hsa-miR-17-5p	SRSF2	0.359132	1.87306e-16
KICH	hsa-miR-17-5p	SRSF2	0.351164	0.00443893
LGG	hsa-miR-17-5p	SRSF2	0.30674	7.40684e-13
LIHC	hsa-miR-17-5p	SRSF2	0.303474	2.94889e-09
LUAD	hsa-miR-17-5p	SRSF2	0.393647	3.96412e-20
LUSC	hsa-miR-17-5p	SRSF2	0.391753	1.80582e-18
MESO	hsa-miR-17-5p	SRSF2	0.339873	0.00136666
PAAD	hsa-miR-17-5p	SRSF2	0.277484	0.000184584
PRAD	hsa-miR-17-5p	SRSF2	0.319017	4.96928e-13
SARC	hsa-miR-17-5p	SRSF2	0.313065	2.8398e-07
SKCM	hsa-miR-17-5p	SRSF2	0.335504	2.8334e-13
STAD	hsa-miR-17-5p	SRSF2	0.393703	3.94416e-15
TGCT	hsa-miR-17-5p	SRSF2	0.285823	0.000311954
THYM	hsa-miR-17-5p	SRSF2	0.600348	5.33596e-13
UCEC	hsa-miR-17-5p	SRSF2	0.368313	3.76029e-18
UCS	hsa-miR-17-5p	SRSF2	0.273971	0.0429635
UVM	hsa-miR-17-5p	SRSF2	0.258456	0.0206238
BLCA	hsa-miR-20a-5p	SRSF2	0.386914	6.51655e-16
BRCA	hsa-miR-20a-5p	SRSF2	0.353881	1.02683e-32
CHOL	hsa-miR-20a-5p	SRSF2	0.500114	0.00189663
DLBC	hsa-miR-20a-5p	SRSF2	0.538267	9.51889e-05
ESCA	hsa-miR-20a-5p	SRSF2	0.308911	7.05364e-05
HNSC	hsa-miR-20a-5p	SRSF2	0.394042	9.2327e-20
KICH	hsa-miR-20a-5p	SRSF2	0.286383	0.0217796
KIRC	hsa-miR-20a-5p	SRSF2	0.292378	2.9808e-11
LGG	hsa-miR-20a-5p	SRSF2	0.353977	6.96667e-17
LIHC	hsa-miR-20a-5p	SRSF2	0.29305	1.05922e-08
LUAD	hsa-miR-20a-5p	SRSF2	0.420633	4.98782e-23
LUSC	hsa-miR-20a-5p	SRSF2	0.385679	6.62693e-18
MESO	hsa-miR-20a-5p	SRSF2	0.270214	0.0118631
PAAD	hsa-miR-20a-5p	SRSF2	0.281635	0.00014615
PRAD	hsa-miR-20a-5p	SRSF2	0.339225	1.23814e-14
SARC	hsa-miR-20a-5p	SRSF2	0.286992	2.7813e-06
SKCM	hsa-miR-20a-5p	SRSF2	0.280053	1.55142e-09
STAD	hsa-miR-20a-5p	SRSF2	0.365514	4.17245e-13
TGCT	hsa-miR-20a-5p	SRSF2	0.451262	3.79378e-09
THYM	hsa-miR-20a-5p	SRSF2	0.587946	2.06355e-12
UCEC	hsa-miR-20a-5p	SRSF2	0.430994	6.1938e-25
ACC	hsa-miR-301a-3p	SRSF2	0.409464	0.000197253
BLCA	hsa-miR-301a-3p	SRSF2	0.392603	2.24027e-16
BRCA	hsa-miR-301a-3p	SRSF2	0.320496	8.10047e-27
ESCA	hsa-miR-301a-3p	SRSF2	0.339695	1.11008e-05
HNSC	hsa-miR-301a-3p	SRSF2	0.252352	1.3383e-08
KICH	hsa-miR-301a-3p	SRSF2	0.37588	0.00220697
LIHC	hsa-miR-301a-3p	SRSF2	0.378505	6.02552e-14
LUAD	hsa-miR-301a-3p	SRSF2	0.293551	1.78628e-11
LUSC	hsa-miR-301a-3p	SRSF2	0.301138	3.50589e-11
READ	hsa-miR-301a-3p	SRSF2	0.320144	5.80111e-05
SARC	hsa-miR-301a-3p	SRSF2	0.302004	7.68307e-07
STAD	hsa-miR-301a-3p	SRSF2	0.343891	1.1076e-11
ACC	hsa-miR-454-3p	SRSF2	0.399813	0.00028725
BLCA	hsa-miR-454-3p	SRSF2	0.368183	1.89918e-14
BRCA	hsa-miR-454-3p	SRSF2	0.340039	3.5042e-30
ESCA	hsa-miR-454-3p	SRSF2	0.370697	1.39818e-06
HNSC	hsa-miR-454-3p	SRSF2	0.346	2.60471e-15
LIHC	hsa-miR-454-3p	SRSF2	0.415095	1.01926e-16
LUAD	hsa-miR-454-3p	SRSF2	0.371379	6.28722e-18
LUSC	hsa-miR-454-3p	SRSF2	0.41565	8.28942e-21
MESO	hsa-miR-454-3p	SRSF2	0.26409	0.0140095
READ	hsa-miR-454-3p	SRSF2	0.295495	0.000219096
SARC	hsa-miR-454-3p	SRSF2	0.449286	3.19707e-14
STAD	hsa-miR-454-3p	SRSF2	0.328812	9.43226e-11
THYM	hsa-miR-454-3p	SRSF2	0.286737	0.00156917
BLCA	hsa-miR-107	SRSF1	0.309033	2.06802e-10
ESCA	hsa-miR-107	SRSF1	0.285991	0.000246335
KIRP	hsa-miR-107	SRSF1	-0.29224	5.35694e-07
LGG	hsa-miR-107	SRSF1	-0.322136	4.29977e-14
LUSC	hsa-miR-107	SRSF1	0.283528	5.00426e-10
OV	hsa-miR-107	SRSF1	0.284929	2.5384e-08
PCPG	hsa-miR-107	SRSF1	0.3165	1.34395e-05
SARC	hsa-miR-107	SRSF1	0.288072	2.54166e-06
STAD	hsa-miR-107	SRSF1	0.327717	1.09704e-10
UCEC	hsa-miR-107	SRSF1	0.268538	4.86043e-10
UCS	hsa-miR-107	SRSF1	0.445105	0.000661565
BLCA	hsa-miR-128-3p	SRSF1	0.354093	2.08507e-13
CESC	hsa-miR-128-3p	SRSF1	0.260506	4.01283e-06
COAD	hsa-miR-128-3p	SRSF1	0.260743	5.69001e-08
LGG	hsa-miR-128-3p	SRSF1	-0.368186	3.10055e-18
LUAD	hsa-miR-128-3p	SRSF1	0.311967	7.72951e-13
LUSC	hsa-miR-128-3p	SRSF1	0.29845	5.32341e-11
STAD	hsa-miR-128-3p	SRSF1	0.456485	2.15531e-20
THCA	hsa-miR-128-3p	SRSF1	0.316276	3.40191e-13
THYM	hsa-miR-128-3p	SRSF1	0.699642	8.63262e-19
UCEC	hsa-miR-128-3p	SRSF1	0.324773	3.07821e-14
ACC	hsa-miR-15b-5p	SRSF1	0.355996	0.00138
BLCA	hsa-miR-15b-5p	SRSF1	0.297079	1.07181e-09
ESCA	hsa-miR-15b-5p	SRSF1	0.376271	9.40943e-07
HNSC	hsa-miR-15b-5p	SRSF1	0.343683	4.0923e-15
LAML	hsa-miR-15b-5p	SRSF1	0.288939	0.000404699
LIHC	hsa-miR-15b-5p	SRSF1	0.410928	2.19507e-16
LUSC	hsa-miR-15b-5p	SRSF1	0.323774	8.74383e-13
SARC	hsa-miR-15b-5p	SRSF1	0.317681	1.85201e-07
STAD	hsa-miR-15b-5p	SRSF1	0.368483	2.6077e-13
TGCT	hsa-miR-15b-5p	SRSF1	0.301868	0.00013495
THYM	hsa-miR-15b-5p	SRSF1	0.554194	6.21543e-11
CESC	hsa-miR-128-3p	SRSF9	0.289276	2.72436e-07
DLBC	hsa-miR-128-3p	SRSF9	-0.331235	0.0229476
ESCA	hsa-miR-128-3p	SRSF9	0.414055	5.24955e-08
LGG	hsa-miR-128-3p	SRSF9	-0.362079	1.20397e-17
LUAD	hsa-miR-128-3p	SRSF9	0.314721	4.74118e-13
LUSC	hsa-miR-128-3p	SRSF9	0.286503	3.23486e-10
SARC	hsa-miR-128-3p	SRSF9	0.268009	1.2767e-05
STAD	hsa-miR-128-3p	SRSF9	0.349002	5.21855e-12
THYM	hsa-miR-128-3p	SRSF9	0.284285	0.00172816
UCS	hsa-miR-128-3p	SRSF9	-0.407049	0.0020412
