# Supplementary material for: Molecular characteristics and clinical implications of serine/arginine-rich splicing factors in human cancer
Source: Aging (Albany NY). 2023 Nov 24;15(22):13287–311. doi: 10.18632/aging.205241 (PMC10713412; doi:10.18632/aging.205241)
Supplement: Supplementary Table 4 [file aging-15-205241-s005.xls]

## Sheet: Table S4
Supplementary Table 4. The association between SRSFs and hallmark pathways in cancer.
SRSFs	Hallmark pathways	cor	pvalue
SRSF2	HALLMARK_ADIPOGENESIS	-0.481341	0
SRSF1	HALLMARK_REACTIVE_OXYGEN_SPECIES_PATHWAY	-0.441478	0
SRSF7	HALLMARK_ADIPOGENESIS	-0.438447	0
SRSF3	HALLMARK_ADIPOGENESIS	-0.409305	0
SRSF1	HALLMARK_ADIPOGENESIS	-0.404007	0
SRSF3	HALLMARK_REACTIVE_OXYGEN_SPECIES_PATHWAY	-0.389983	0
SRSF10	HALLMARK_REACTIVE_OXYGEN_SPECIES_PATHWAY	-0.376549	0
SRSF10	HALLMARK_ADIPOGENESIS	-0.367789	0
SRSF3	HALLMARK_BILE_ACID_METABOLISM	-0.361571	1.63671665995249e-316
SRSF10	HALLMARK_OXIDATIVE_PHOSPHORYLATION	-0.361294	5.37783617629658e-316
SRSF1	HALLMARK_HYPOXIA	-0.34745	8.06e-291
SRSF10	HALLMARK_CHOLESTEROL_HOMEOSTASIS	-0.344313	2.73e-285
SRSF3	HALLMARK_XENOBIOTIC_METABOLISM	-0.343674	3.59e-284
SRSF7	HALLMARK_HYPOXIA	-0.343076	3.99e-283
SRSF7	HALLMARK_BILE_ACID_METABOLISM	-0.341764	7.67e-281
SRSF2	HALLMARK_REACTIVE_OXYGEN_SPECIES_PATHWAY	-0.33795	2.89e-274
SRSF7	HALLMARK_XENOBIOTIC_METABOLISM	-0.324429	1.08e-251
SRSF10	HALLMARK_XENOBIOTIC_METABOLISM	-0.322392	2.16e-248
SRSF7	HALLMARK_REACTIVE_OXYGEN_SPECIES_PATHWAY	-0.322025	8.46e-248
SRSF3	HALLMARK_COAGULATION	-0.321668	3.18e-247
SRSF4	HALLMARK_ADIPOGENESIS	-0.321343	1.06e-246
SRSF10	HALLMARK_HYPOXIA	-0.320169	8.13e-245
SRSF4	HALLMARK_BILE_ACID_METABOLISM	-0.31816	1.3e-241
SRSF8	HALLMARK_COAGULATION	-0.317156	5.07e-240
SRSF4	HALLMARK_XENOBIOTIC_METABOLISM	-0.316078	2.56e-238
SRSF2	HALLMARK_HYPOXIA	-0.314547	6.5e-236
SRSF2	HALLMARK_UV_RESPONSE_DN	-0.313428	3.66e-234
SRSF5	HALLMARK_MTORC1_SIGNALING	-0.31308	1.28e-233
SRSF11	HALLMARK_CHOLESTEROL_HOMEOSTASIS	-0.311702	1.76e-231
SRSF1	HALLMARK_BILE_ACID_METABOLISM	-0.311698	1.79e-231
SRSF8	HALLMARK_COMPLEMENT	-0.307591	3.67e-225
SRSF1	HALLMARK_OXIDATIVE_PHOSPHORYLATION	-0.306731	7.48e-224
SRSF7	HALLMARK_FATTY_ACID_METABOLISM	-0.306388	2.48e-223
SRSF7	HALLMARK_PROTEIN_SECRETION	-0.305769	2.16e-222
SRSF2	HALLMARK_FATTY_ACID_METABOLISM	-0.304783	6.66e-221
SRSF1	HALLMARK_XENOBIOTIC_METABOLISM	-0.304653	1.05e-220
SRSF1	HALLMARK_COAGULATION	-0.304128	6.45e-220
SRSF10	HALLMARK_COAGULATION	-0.302311	3.41e-217
SRSF3	HALLMARK_FATTY_ACID_METABOLISM	-0.301814	1.88e-216
SRSF4	HALLMARK_CHOLESTEROL_HOMEOSTASIS	-0.299969	1.04e-213
SRSF10	HALLMARK_FATTY_ACID_METABOLISM	-0.299843	1.59e-213
SRSF12	HALLMARK_INTERFERON_ALPHA_RESPONSE	-0.296421	1.69e-208
SRSF7	HALLMARK_COAGULATION	-0.295878	1.04e-207
SRSF2	HALLMARK_BILE_ACID_METABOLISM	-0.295717	1.79e-207
SRSF1	HALLMARK_FATTY_ACID_METABOLISM	-0.294701	5.34e-206
SRSF2	HALLMARK_PROTEIN_SECRETION	-0.289795	5.82e-199
SRSF12	HALLMARK_ESTROGEN_RESPONSE_LATE	-0.289567	1.22e-198
SRSF10	HALLMARK_BILE_ACID_METABOLISM	-0.286247	5.84e-194
SRSF4	HALLMARK_FATTY_ACID_METABOLISM	-0.28543	8.09e-193
SRSF4	HALLMARK_COAGULATION	-0.282172	2.64e-188
SRSF6	HALLMARK_HYPOXIA	-0.280565	4.22e-186
SRSF3	HALLMARK_HYPOXIA	-0.277338	1.02e-181
SRSF4	HALLMARK_PEROXISOME	-0.277293	1.17e-181
SRSF2	HALLMARK_XENOBIOTIC_METABOLISM	-0.276419	1.76e-180
SRSF7	HALLMARK_OXIDATIVE_PHOSPHORYLATION	-0.275373	4.44e-179
SRSF11	HALLMARK_COAGULATION	-0.274165	1.82e-177
SRSF7	HALLMARK_UV_RESPONSE_DN	-0.269469	2.8e-171
SRSF11	HALLMARK_XENOBIOTIC_METABOLISM	-0.267892	3.14e-169
SRSF2	HALLMARK_OXIDATIVE_PHOSPHORYLATION	-0.265235	8.35e-166
SRSF2	HALLMARK_COAGULATION	-0.26382	5.34e-164
SRSF9	HALLMARK_BILE_ACID_METABOLISM	-0.262855	8.99e-163
SRSF9	HALLMARK_ADIPOGENESIS	-0.260387	1.17e-159
SRSF8	HALLMARK_XENOBIOTIC_METABOLISM	-0.259508	1.47e-158
SRSF11	HALLMARK_OXIDATIVE_PHOSPHORYLATION	-0.259018	6.01e-158
SRSF12	HALLMARK_APOPTOSIS	-0.258432	3.22e-157
SRSF10	HALLMARK_UV_RESPONSE_UP	-0.257682	2.75e-156
SRSF3	HALLMARK_OXIDATIVE_PHOSPHORYLATION	-0.257442	5.44e-156
SRSF9	HALLMARK_UV_RESPONSE_DN	-0.254789	1e-152
SRSF1	HALLMARK_CHOLESTEROL_HOMEOSTASIS	-0.252909	1.96e-150
SRSF3	HALLMARK_CHOLESTEROL_HOMEOSTASIS	-0.249033	8.97e-146
SRSF6	HALLMARK_COMPLEMENT	-0.247653	3.92e-144
SRSF7	HALLMARK_CHOLESTEROL_HOMEOSTASIS	-0.246451	1.03e-142
SRSF11	HALLMARK_REACTIVE_OXYGEN_SPECIES_PATHWAY	-0.245142	3.56e-141
SRSF8	HALLMARK_E2F_TARGETS	-0.243937	9.12e-140
SRSF2	HALLMARK_CHOLESTEROL_HOMEOSTASIS	-0.242867	1.59e-138
SRSF3	HALLMARK_PEROXISOME	-0.241868	2.28e-137
SRSF9	HALLMARK_COAGULATION	-0.241724	3.34e-137
SRSF7	HALLMARK_ANGIOGENESIS	-0.241634	4.24e-137
SRSF9	HALLMARK_XENOBIOTIC_METABOLISM	-0.240672	5.41e-136
SRSF6	HALLMARK_COAGULATION	-0.240575	7.01e-136
SRSF5	HALLMARK_GLYCOLYSIS	-0.239899	4.16e-135
SRSF2	HALLMARK_TGF_BETA_SIGNALING	-0.236405	3.81e-131
SRSF2	HALLMARK_NOTCH_SIGNALING	-0.235907	1.38e-130
SRSF12	HALLMARK_IL6_JAK_STAT3_SIGNALING	-0.234572	4.31e-129
SRSF8	HALLMARK_BILE_ACID_METABOLISM	-0.234153	1.26e-128
SRSF11	HALLMARK_FATTY_ACID_METABOLISM	-0.231139	2.69e-125
SRSF2	HALLMARK_ANGIOGENESIS	-0.230905	4.86e-125
SRSF12	HALLMARK_TNFA_SIGNALING_VIA_NFKB	-0.229394	2.17e-123
SRSF2	HALLMARK_PEROXISOME	-0.229371	2.3e-123
SRSF3	HALLMARK_PROTEIN_SECRETION	-0.229266	2.98e-123
SRSF6	HALLMARK_REACTIVE_OXYGEN_SPECIES_PATHWAY	-0.228366	2.83e-122
SRSF12	HALLMARK_INTERFERON_GAMMA_RESPONSE	-0.227754	1.3e-121
SRSF10	HALLMARK_PEROXISOME	-0.225835	1.49e-119
SRSF9	HALLMARK_COMPLEMENT	-0.223905	1.69e-117
SRSF5	HALLMARK_EPITHELIAL_MESENCHYMAL_TRANSITION	-0.223574	3.78e-117
SRSF12	HALLMARK_ESTROGEN_RESPONSE_EARLY	-0.220068	1.79e-113
SRSF11	HALLMARK_BILE_ACID_METABOLISM	-0.216904	3.26e-110
SRSF10	HALLMARK_MYOGENESIS	-0.216376	1.13e-109
SRSF8	HALLMARK_G2M_CHECKPOINT	-0.214576	7.58e-108
SRSF11	HALLMARK_ADIPOGENESIS	-0.214453	1.01e-107
SRSF7	HALLMARK_PEROXISOME	-0.213492	9.4e-107
SRSF4	HALLMARK_OXIDATIVE_PHOSPHORYLATION	-0.212582	7.67e-106
SRSF2	HALLMARK_ANDROGEN_RESPONSE	-0.211702	5.8e-105
SRSF8	HALLMARK_IL6_JAK_STAT3_SIGNALING	-0.210905	3.59e-104
SRSF8	HALLMARK_ALLOGRAFT_REJECTION	-0.210202	1.79e-103
SRSF5	HALLMARK_ANGIOGENESIS	-0.206701	4.79e-100
SRSF1	HALLMARK_PEROXISOME	-0.206304	1.16e-99
SRSF3	HALLMARK_ANGIOGENESIS	-0.203733	3.44e-97
SRSF2	HALLMARK_PANCREAS_BETA_CELLS	-0.200187	7.81e-94
SRSF1	HALLMARK_ANGIOGENESIS	-0.200074	9.97e-94
SRSF4	HALLMARK_ANDROGEN_RESPONSE	-0.198726	1.81e-92
SRSF3	HALLMARK_UV_RESPONSE_DN	-0.19794	9.68e-92
SRSF4	HALLMARK_REACTIVE_OXYGEN_SPECIES_PATHWAY	-0.197831	1.22e-91
SRSF5	HALLMARK_COAGULATION	-0.195003	4.83e-89
SRSF6	HALLMARK_ANGIOGENESIS	-0.1939	4.85e-88
SRSF7	HALLMARK_PANCREAS_BETA_CELLS	-0.19356	9.86e-88
SRSF3	HALLMARK_PANCREAS_BETA_CELLS	-0.189605	3.39e-84
SRSF1	HALLMARK_PANCREAS_BETA_CELLS	-0.188023	8.36e-83
SRSF12	HALLMARK_COAGULATION	-0.187854	1.18e-82
SRSF8	HALLMARK_INFLAMMATORY_RESPONSE	-0.187103	5.33e-82
SRSF7	HALLMARK_TGF_BETA_SIGNALING	-0.186135	3.7e-81
SRSF6	HALLMARK_XENOBIOTIC_METABOLISM	-0.185892	6e-81
SRSF6	HALLMARK_TNFA_SIGNALING_VIA_NFKB	-0.184987	3.63e-80
SRSF11	HALLMARK_UV_RESPONSE_UP	-0.184415	1.13e-79
SRSF9	HALLMARK_FATTY_ACID_METABOLISM	-0.183765	4.06e-79
SRSF12	HALLMARK_P53_PATHWAY	-0.183524	6.53e-79
SRSF7	HALLMARK_HEDGEHOG_SIGNALING	-0.175758	1.99e-72
SRSF10	HALLMARK_ANGIOGENESIS	-0.175245	5.19e-72
SRSF10	HALLMARK_P53_PATHWAY	-0.174486	2.15e-71
SRSF12	HALLMARK_INFLAMMATORY_RESPONSE	-0.174419	2.43e-71
SRSF9	HALLMARK_PROTEIN_SECRETION	-0.174392	2.55e-71
SRSF9	HALLMARK_PANCREAS_BETA_CELLS	-0.174201	3.64e-71
SRSF3	HALLMARK_HEME_METABOLISM	-0.173829	7.27e-71
SRSF2	HALLMARK_HEDGEHOG_SIGNALING	-0.171928	2.43e-69
SRSF5	HALLMARK_E2F_TARGETS	-0.171194	9.32e-69
SRSF10	HALLMARK_PANCREAS_BETA_CELLS	-0.169024	4.78e-67
SRSF1	HALLMARK_NOTCH_SIGNALING	-0.165472	2.68e-64
SRSF11	HALLMARK_HYPOXIA	-0.164171	2.64e-63
SRSF8	HALLMARK_INTERFERON_GAMMA_RESPONSE	-0.163647	6.58e-63
SRSF6	HALLMARK_BILE_ACID_METABOLISM	-0.162689	3.47e-62
SRSF12	HALLMARK_COMPLEMENT	-0.162322	6.56e-62
SRSF5	HALLMARK_G2M_CHECKPOINT	-0.162237	7.6e-62
SRSF3	HALLMARK_TGF_BETA_SIGNALING	-0.161653	2.08e-61
SRSF12	HALLMARK_ALLOGRAFT_REJECTION	-0.159169	1.44e-59
SRSF2	HALLMARK_MYOGENESIS	-0.157806	1.43e-58
SRSF4	HALLMARK_PANCREAS_BETA_CELLS	-0.15645	1.37e-57
SRSF1	HALLMARK_COMPLEMENT	-0.155986	2.97e-57
SRSF11	HALLMARK_GLYCOLYSIS	-0.155199	1.09e-56
SRSF6	HALLMARK_OXIDATIVE_PHOSPHORYLATION	-0.15444	3.8e-56
SRSF12	HALLMARK_KRAS_SIGNALING_DN	-0.154037	7.35e-56
SRSF10	HALLMARK_HEDGEHOG_SIGNALING	-0.153975	8.14e-56
SRSF9	HALLMARK_REACTIVE_OXYGEN_SPECIES_PATHWAY	-0.153011	3.92e-55
SRSF1	HALLMARK_UV_RESPONSE_UP	-0.152471	9.4e-55
SRSF7	HALLMARK_NOTCH_SIGNALING	-0.150631	1.81e-53
SRSF4	HALLMARK_PROTEIN_SECRETION	-0.148978	2.5e-52
SRSF9	HALLMARK_ANGIOGENESIS	-0.1487	3.88e-52
SRSF3	HALLMARK_NOTCH_SIGNALING	-0.148465	5.62e-52
SRSF7	HALLMARK_MYOGENESIS	-0.144476	2.75e-49
SRSF1	HALLMARK_HEDGEHOG_SIGNALING	-0.143473	1.27e-48
SRSF11	HALLMARK_PEROXISOME	-0.142814	3.44e-48
SRSF7	HALLMARK_HEME_METABOLISM	-0.142737	3.87e-48
SRSF3	HALLMARK_COMPLEMENT	-0.14005	2.16e-46
SRSF7	HALLMARK_COMPLEMENT	-0.139756	3.33e-46
SRSF8	HALLMARK_APICAL_SURFACE	-0.137765	6.2e-45
SRSF3	HALLMARK_HEDGEHOG_SIGNALING	-0.136366	4.71e-44
SRSF9	HALLMARK_TGF_BETA_SIGNALING	-0.135828	1.02e-43
SRSF6	HALLMARK_CHOLESTEROL_HOMEOSTASIS	-0.135085	2.96e-43
SRSF6	HALLMARK_EPITHELIAL_MESENCHYMAL_TRANSITION	-0.134853	4.12e-43
SRSF7	HALLMARK_ANDROGEN_RESPONSE	-0.134263	9.54e-43
SRSF1	HALLMARK_TGF_BETA_SIGNALING	-0.13384	1.74e-42
SRSF1	HALLMARK_UV_RESPONSE_DN	-0.132906	6.48e-42
SRSF1	HALLMARK_MYOGENESIS	-0.13256	1.05e-41
SRSF9	HALLMARK_HEME_METABOLISM	-0.132418	1.28e-41
SRSF10	HALLMARK_NOTCH_SIGNALING	-0.130672	1.45e-40
SRSF5	HALLMARK_CHOLESTEROL_HOMEOSTASIS	-0.129735	5.27e-40
SRSF9	HALLMARK_HYPOXIA	-0.129277	9.87e-40
SRSF4	HALLMARK_UV_RESPONSE_UP	-0.129055	1.34e-39
SRSF8	HALLMARK_KRAS_SIGNALING_DN	-0.128455	3.02e-39
SRSF1	HALLMARK_HEME_METABOLISM	-0.127422	1.22e-38
SRSF8	HALLMARK_INTERFERON_ALPHA_RESPONSE	-0.12619	6.33e-38
SRSF9	HALLMARK_HEDGEHOG_SIGNALING	-0.125333	1.98e-37
SRSF4	HALLMARK_ANGIOGENESIS	-0.123817	1.45e-36
SRSF11	HALLMARK_ANGIOGENESIS	-0.123453	2.33e-36
SRSF9	HALLMARK_KRAS_SIGNALING_UP	-0.117812	3.05e-33
SRSF6	HALLMARK_P53_PATHWAY	-0.11538	6.06e-32
SRSF2	HALLMARK_APICAL_JUNCTION	-0.113142	8.96e-31
SRSF12	HALLMARK_EPITHELIAL_MESENCHYMAL_TRANSITION	-0.111318	7.74e-30
SRSF9	HALLMARK_PEROXISOME	-0.110698	1.6e-29
SRSF1	HALLMARK_PROTEIN_SECRETION	-0.109235	8.7e-29
SRSF5	HALLMARK_COMPLEMENT	-0.1079	4e-28
SRSF1	HALLMARK_P53_PATHWAY	-0.107428	6.83e-28
SRSF6	HALLMARK_INTERFERON_GAMMA_RESPONSE	-0.106765	1.44e-27
SRSF5	HALLMARK_MYC_TARGETS_V2	-0.105552	5.61e-27
SRSF2	HALLMARK_HEME_METABOLISM	-0.105504	5.91e-27
SRSF11	HALLMARK_COMPLEMENT	-0.105337	7.12e-27
SRSF9	HALLMARK_OXIDATIVE_PHOSPHORYLATION	-0.105124	9.01e-27
SRSF8	HALLMARK_SPERMATOGENESIS	-0.10253	1.54e-25
SRSF4	HALLMARK_HEME_METABOLISM	-0.102218	2.15e-25
SRSF6	HALLMARK_ADIPOGENESIS	-0.0992351	5.08e-24
SRSF10	HALLMARK_APICAL_JUNCTION	-0.0976636	2.59e-23
SRSF4	HALLMARK_COMPLEMENT	-0.0971466	4.4e-23
SRSF9	HALLMARK_MYOGENESIS	-0.0970555	4.83e-23
SRSF11	HALLMARK_P53_PATHWAY	-0.0970311	4.95e-23
SRSF11	HALLMARK_PANCREAS_BETA_CELLS	-0.0956651	1.98e-22
SRSF8	HALLMARK_MYC_TARGETS_V2	-0.0954813	2.38e-22
SRSF2	HALLMARK_EPITHELIAL_MESENCHYMAL_TRANSITION	-0.0943512	7.37e-22
SRSF12	HALLMARK_XENOBIOTIC_METABOLISM	-0.0933751	1.93e-21
SRSF11	HALLMARK_MYOGENESIS	-0.0927118	3.7e-21
SRSF6	HALLMARK_IL6_JAK_STAT3_SIGNALING	-0.0918662	8.42e-21
SRSF12	HALLMARK_ANGIOGENESIS	-0.0905354	3.02e-20
SRSF4	HALLMARK_HEDGEHOG_SIGNALING	-0.0898335	5.88e-20
SRSF3	HALLMARK_MYOGENESIS	-0.0898163	5.98e-20
SRSF5	HALLMARK_TNFA_SIGNALING_VIA_NFKB	-0.0891774	1.09e-19
SRSF6	HALLMARK_INFLAMMATORY_RESPONSE	-0.0886137	1.85e-19
SRSF6	HALLMARK_PANCREAS_BETA_CELLS	-0.0884649	2.13e-19
SRSF6	HALLMARK_INTERFERON_ALPHA_RESPONSE	-0.0883683	2.33e-19
SRSF5	HALLMARK_INFLAMMATORY_RESPONSE	-0.0883053	2.47e-19
SRSF5	HALLMARK_IL6_JAK_STAT3_SIGNALING	-0.0870621	7.78e-19
SRSF3	HALLMARK_ANDROGEN_RESPONSE	-0.0853491	3.68e-18
SRSF10	HALLMARK_GLYCOLYSIS	-0.0843741	8.81e-18
SRSF10	HALLMARK_UNFOLDED_PROTEIN_RESPONSE	-0.0839145	1.32e-17
SRSF12	HALLMARK_IL2_STAT5_SIGNALING	-0.0809728	1.71e-16
SRSF11	HALLMARK_MTORC1_SIGNALING	-0.0805887	2.37e-16
SRSF2	HALLMARK_COMPLEMENT	-0.0787725	1.09e-15
SRSF7	HALLMARK_APICAL_JUNCTION	-0.0776025	2.86e-15
SRSF6	HALLMARK_MTORC1_SIGNALING	-0.0773437	3.53e-15
SRSF8	HALLMARK_TNFA_SIGNALING_VIA_NFKB	-0.0754904	1.57e-14
SRSF6	HALLMARK_FATTY_ACID_METABOLISM	-0.0735639	7.16e-14
SRSF9	HALLMARK_NOTCH_SIGNALING	-0.0729453	1.16e-13
SRSF8	HALLMARK_MTORC1_SIGNALING	-0.0723096	1.88e-13
SRSF7	HALLMARK_P53_PATHWAY	-0.0717411	2.9e-13
SRSF12	HALLMARK_OXIDATIVE_PHOSPHORYLATION	-0.0694836	1.56e-12
SRSF4	HALLMARK_ESTROGEN_RESPONSE_EARLY	-0.0667167	1.15e-11
SRSF10	HALLMARK_COMPLEMENT	-0.0664531	1.38e-11
SRSF6	HALLMARK_APOPTOSIS	-0.065556	2.59e-11
SRSF5	HALLMARK_XENOBIOTIC_METABOLISM	-0.0651523	3.42e-11
SRSF3	HALLMARK_P53_PATHWAY	-0.0649681	3.89e-11
SRSF1	HALLMARK_KRAS_SIGNALING_UP	-0.0634488	1.09e-10
SRSF5	HALLMARK_HYPOXIA	-0.0579487	3.79e-09
SRSF12	HALLMARK_APICAL_SURFACE	-0.0578711	3.98e-09
SRSF9	HALLMARK_ANDROGEN_RESPONSE	-0.0548986	2.37e-08
SRSF6	HALLMARK_IL2_STAT5_SIGNALING	-0.0543683	3.23e-08
SRSF8	HALLMARK_MITOTIC_SPINDLE	-0.0540798	3.82e-08
SRSF1	HALLMARK_APICAL_JUNCTION	-0.052522	9.27e-08
SRSF7	HALLMARK_EPITHELIAL_MESENCHYMAL_TRANSITION	-0.0510999	2.04e-07
SRSF10	HALLMARK_DNA_REPAIR	-0.0493004	5.37e-07
SRSF8	HALLMARK_IL2_STAT5_SIGNALING	-0.0488651	6.76e-07
SRSF9	HALLMARK_CHOLESTEROL_HOMEOSTASIS	-0.0482161	9.48e-07
SRSF4	HALLMARK_MYOGENESIS	-0.0471862	1.61e-06
SRSF3	HALLMARK_APICAL_JUNCTION	-0.0468192	1.94e-06
SRSF6	HALLMARK_MYOGENESIS	-0.0464088	2.38e-06
SRSF12	HALLMARK_MYC_TARGETS_V2	-0.0458412	3.16e-06
SRSF12	HALLMARK_MTORC1_SIGNALING	-0.0458388	3.16e-06
SRSF7	HALLMARK_UV_RESPONSE_UP	-0.0448771	5.06e-06
SRSF4	HALLMARK_GLYCOLYSIS	-0.0443978	6.38e-06
SRSF1	HALLMARK_APOPTOSIS	-0.0438372	8.33e-06
SRSF4	HALLMARK_UV_RESPONSE_DN	-0.0429984	1.24e-05
SRSF9	HALLMARK_IL2_STAT5_SIGNALING	-0.0426934	1.42e-05
SRSF1	HALLMARK_TNFA_SIGNALING_VIA_NFKB	-0.0420388	1.92e-05
SRSF2	HALLMARK_ESTROGEN_RESPONSE_EARLY	-0.0418971	2.05e-05
SRSF5	HALLMARK_INTERFERON_ALPHA_RESPONSE	-0.0412119	2.8e-05
SRSF9	HALLMARK_INTERFERON_ALPHA_RESPONSE	-0.0399007	4.99e-05
SRSF3	HALLMARK_UV_RESPONSE_UP	-0.0396219	5.64e-05
SRSF4	HALLMARK_UNFOLDED_PROTEIN_RESPONSE	-0.0390731	7.14e-05
SRSF11	HALLMARK_EPITHELIAL_MESENCHYMAL_TRANSITION	-0.0383901	9.53e-05
SRSF2	HALLMARK_KRAS_SIGNALING_UP	-0.0377723	0.000123335
SRSF2	HALLMARK_UV_RESPONSE_UP	-0.0371869	0.000156922
SRSF2	HALLMARK_APOPTOSIS	-0.0364353	0.000212728
SRSF4	HALLMARK_KRAS_SIGNALING_UP	-0.035465	0.000312492
SRSF5	HALLMARK_INTERFERON_GAMMA_RESPONSE	-0.0352331	0.000342115
SRSF12	HALLMARK_FATTY_ACID_METABOLISM	-0.0346376	0.000430624
SRSF11	HALLMARK_MYC_TARGETS_V2	-0.0343488	0.000480871
SRSF10	HALLMARK_HEME_METABOLISM	-0.0335591	0.000647516
SRSF9	HALLMARK_INTERFERON_GAMMA_RESPONSE	-0.032886	0.000830457
SRSF2	HALLMARK_P53_PATHWAY	-0.029667	0.00256879
SRSF6	HALLMARK_UV_RESPONSE_UP	-0.0276793	0.00490782
SRSF6	HALLMARK_GLYCOLYSIS	-0.0267583	0.00654026
SRSF12	HALLMARK_GLYCOLYSIS	-0.0256451	0.00915475
SRSF6	HALLMARK_KRAS_SIGNALING_UP	-0.025598	0.00928377
SRSF4	HALLMARK_HYPOXIA	-0.0251327	0.0106453
SRSF5	HALLMARK_UNFOLDED_PROTEIN_RESPONSE	-0.0228815	0.0200567
SRSF10	HALLMARK_EPITHELIAL_MESENCHYMAL_TRANSITION	-0.0220626	0.0249588
SRSF2	HALLMARK_UNFOLDED_PROTEIN_RESPONSE	-0.0217246	0.0272658
SRSF12	HALLMARK_ANDROGEN_RESPONSE	-0.021201	0.0312033
SRSF12	HALLMARK_REACTIVE_OXYGEN_SPECIES_PATHWAY	-0.018779	0.0563533
SRSF11	HALLMARK_HEDGEHOG_SIGNALING	-0.0185174	0.0598762
SRSF9	HALLMARK_TNFA_SIGNALING_VIA_NFKB	-0.0172966	0.0788095
SRSF12	HALLMARK_BILE_ACID_METABOLISM	-0.0169423	0.0851383
SRSF9	HALLMARK_UV_RESPONSE_UP	-0.0160471	0.102966
SRSF8	HALLMARK_ANGIOGENESIS	-0.015249	0.121254
SRSF1	HALLMARK_EPITHELIAL_MESENCHYMAL_TRANSITION	-0.0149966	0.127538
SRSF4	HALLMARK_NOTCH_SIGNALING	-0.014173	0.149815
SRSF7	HALLMARK_KRAS_SIGNALING_UP	-0.00835388	0.395965
SRSF12	HALLMARK_E2F_TARGETS	-0.00730629	0.457846
SRSF11	HALLMARK_NOTCH_SIGNALING	-0.00678656	0.490454
SRSF11	HALLMARK_UNFOLDED_PROTEIN_RESPONSE	-0.00664208	0.499735
SRSF12	HALLMARK_MYC_TARGETS_V1	-0.00614523	0.532352
SRSF1	HALLMARK_GLYCOLYSIS	-0.00521619	0.596099
SRSF9	HALLMARK_IL6_JAK_STAT3_SIGNALING	-0.00505604	0.60743
SRSF12	HALLMARK_G2M_CHECKPOINT	-0.00419452	0.669958
SRSF6	HALLMARK_NOTCH_SIGNALING	-0.00333085	0.735027
SRSF3	HALLMARK_KRAS_SIGNALING_UP	-0.00287879	0.769894
SRSF6	HALLMARK_ALLOGRAFT_REJECTION	-0.000449688	0.963555
SRSF6	HALLMARK_HEDGEHOG_SIGNALING	-0.000253842	0.979423
SRSF6	HALLMARK_UV_RESPONSE_DN	0.000988562	0.919989
SRSF5	HALLMARK_NOTCH_SIGNALING	0.00208262	0.832408
SRSF9	HALLMARK_EPITHELIAL_MESENCHYMAL_TRANSITION	0.00234608	0.811583
SRSF4	HALLMARK_MTORC1_SIGNALING	0.00282809	0.773835
SRSF11	HALLMARK_APICAL_SURFACE	0.00285287	0.771909
SRSF10	HALLMARK_TGF_BETA_SIGNALING	0.00352077	0.720534
SRSF8	HALLMARK_EPITHELIAL_MESENCHYMAL_TRANSITION	0.00421971	0.668095
SRSF5	HALLMARK_BILE_ACID_METABOLISM	0.0051386	0.601577
SRSF5	HALLMARK_MYC_TARGETS_V1	0.00553705	0.573693
SRSF11	HALLMARK_DNA_REPAIR	0.00651168	0.508191
SRSF5	HALLMARK_KRAS_SIGNALING_UP	0.00697474	0.478505
SRSF3	HALLMARK_EPITHELIAL_MESENCHYMAL_TRANSITION	0.00931145	0.344071
SRSF1	HALLMARK_INTERFERON_ALPHA_RESPONSE	0.0093271	0.34326
SRSF5	HALLMARK_ESTROGEN_RESPONSE_LATE	0.0118702	0.227752
SRSF7	HALLMARK_UNFOLDED_PROTEIN_RESPONSE	0.012242	0.213518
SRSF12	HALLMARK_CHOLESTEROL_HOMEOSTASIS	0.0138053	0.160671
SRSF1	HALLMARK_IL2_STAT5_SIGNALING	0.0141575	0.150262
SRSF3	HALLMARK_APOPTOSIS	0.0164568	0.0944693
SRSF5	HALLMARK_OXIDATIVE_PHOSPHORYLATION	0.0167902	0.0879776
SRSF5	HALLMARK_KRAS_SIGNALING_DN	0.0168653	0.0865664
SRSF4	HALLMARK_ESTROGEN_RESPONSE_LATE	0.0176053	0.0736139
SRSF1	HALLMARK_ANDROGEN_RESPONSE	0.0190881	0.0524153
SRSF10	HALLMARK_WNT_BETA_CATENIN_SIGNALING	0.0206647	0.0357324
SRSF9	HALLMARK_APICAL_JUNCTION	0.0217823	0.0268598
SRSF10	HALLMARK_UV_RESPONSE_DN	0.0218946	0.0260836
SRSF3	HALLMARK_UNFOLDED_PROTEIN_RESPONSE	0.0219484	0.0257187
SRSF3	HALLMARK_GLYCOLYSIS	0.021969	0.0255798
SRSF11	HALLMARK_INTERFERON_ALPHA_RESPONSE	0.0235257	0.0168132
SRSF8	HALLMARK_GLYCOLYSIS	0.0240732	0.0144281
SRSF8	HALLMARK_MYC_TARGETS_V1	0.0279727	0.00447124
SRSF12	HALLMARK_ADIPOGENESIS	0.0290289	0.00317535
SRSF1	HALLMARK_INTERFERON_GAMMA_RESPONSE	0.0290607	0.00314222
SRSF1	HALLMARK_UNFOLDED_PROTEIN_RESPONSE	0.0292349	0.00296653
SRSF11	HALLMARK_APOPTOSIS	0.0292851	0.00291767
SRSF2	HALLMARK_GLYCOLYSIS	0.0294197	0.00279002
SRSF6	HALLMARK_TGF_BETA_SIGNALING	0.0307619	0.00176932
SRSF5	HALLMARK_ALLOGRAFT_REJECTION	0.0312246	0.00150616
SRSF8	HALLMARK_CHOLESTEROL_HOMEOSTASIS	0.0312693	0.00148277
SRSF8	HALLMARK_FATTY_ACID_METABOLISM	0.0316508	0.00129618
SRSF11	HALLMARK_APICAL_JUNCTION	0.0320838	0.00111074
SRSF3	HALLMARK_TNFA_SIGNALING_VIA_NFKB	0.0325593	0.000935592
SRSF7	HALLMARK_APOPTOSIS	0.0325725	0.000931111
SRSF8	HALLMARK_UV_RESPONSE_UP	0.0333423	0.000701902
SRSF5	HALLMARK_APOPTOSIS	0.0334176	0.000682536
SRSF10	HALLMARK_PROTEIN_SECRETION	0.0339325	0.000562959
SRSF12	HALLMARK_UNFOLDED_PROTEIN_RESPONSE	0.0346724	0.000424914
SRSF5	HALLMARK_PANCREAS_BETA_CELLS	0.034793	0.000405661
SRSF11	HALLMARK_TNFA_SIGNALING_VIA_NFKB	0.0366937	0.000191716
SRSF3	HALLMARK_INTERFERON_ALPHA_RESPONSE	0.0376328	0.000130662
SRSF9	HALLMARK_ALLOGRAFT_REJECTION	0.0376936	0.000127418
SRSF10	HALLMARK_APOPTOSIS	0.0388534	7.84e-05
SRSF4	HALLMARK_TGF_BETA_SIGNALING	0.0389094	7.65e-05
SRSF5	HALLMARK_APICAL_SURFACE	0.0397378	5.36e-05
SRSF8	HALLMARK_P53_PATHWAY	0.0405025	3.84e-05
SRSF10	HALLMARK_TNFA_SIGNALING_VIA_NFKB	0.0405387	3.78e-05
SRSF7	HALLMARK_ESTROGEN_RESPONSE_EARLY	0.0414175	2.55e-05
SRSF7	HALLMARK_TNFA_SIGNALING_VIA_NFKB	0.0430689	1.2e-05
SRSF9	HALLMARK_APOPTOSIS	0.0448289	5.18e-06
SRSF8	HALLMARK_REACTIVE_OXYGEN_SPECIES_PATHWAY	0.0461423	2.72e-06
SRSF4	HALLMARK_EPITHELIAL_MESENCHYMAL_TRANSITION	0.0493101	5.35e-07
SRSF3	HALLMARK_ESTROGEN_RESPONSE_EARLY	0.0498713	3.97e-07
SRSF6	HALLMARK_APICAL_JUNCTION	0.0506759	2.57e-07
SRSF5	HALLMARK_MITOTIC_SPINDLE	0.0507949	2.41e-07
SRSF1	HALLMARK_DNA_REPAIR	0.0513605	1.77e-07
SRSF12	HALLMARK_SPERMATOGENESIS	0.0518562	1.34e-07
SRSF9	HALLMARK_INFLAMMATORY_RESPONSE	0.0530265	6.98e-08
SRSF11	HALLMARK_INTERFERON_GAMMA_RESPONSE	0.0546024	2.82e-08
SRSF6	HALLMARK_PEROXISOME	0.0548115	2.5e-08
SRSF2	HALLMARK_WNT_BETA_CATENIN_SIGNALING	0.0564981	9.17e-09
SRSF8	HALLMARK_HYPOXIA	0.0570184	6.7e-09
SRSF1	HALLMARK_IL6_JAK_STAT3_SIGNALING	0.0571884	6.04e-09
SRSF7	HALLMARK_GLYCOLYSIS	0.0588267	2.2e-09
SRSF11	HALLMARK_WNT_BETA_CATENIN_SIGNALING	0.0629633	1.51e-10
SRSF10	HALLMARK_ANDROGEN_RESPONSE	0.0634401	1.1e-10
SRSF5	HALLMARK_REACTIVE_OXYGEN_SPECIES_PATHWAY	0.0640499	7.28e-11
SRSF9	HALLMARK_PI3K_AKT_MTOR_SIGNALING	0.0660805	1.8e-11
SRSF2	HALLMARK_TNFA_SIGNALING_VIA_NFKB	0.0664162	1.42e-11
SRSF8	HALLMARK_MYOGENESIS	0.0671329	8.55e-12
SRSF3	HALLMARK_IL2_STAT5_SIGNALING	0.0680396	4.47e-12
SRSF10	HALLMARK_INTERFERON_ALPHA_RESPONSE	0.068997	2.23e-12
SRSF3	HALLMARK_INTERFERON_GAMMA_RESPONSE	0.0712884	4.08e-13
SRSF11	HALLMARK_HEME_METABOLISM	0.0714397	3.64e-13
SRSF2	HALLMARK_IL2_STAT5_SIGNALING	0.0737509	6.19e-14
SRSF11	HALLMARK_IL6_JAK_STAT3_SIGNALING	0.0743259	3.95e-14
SRSF7	HALLMARK_INTERFERON_ALPHA_RESPONSE	0.0749833	2.35e-14
SRSF11	HALLMARK_ESTROGEN_RESPONSE_LATE	0.0753067	1.82e-14
SRSF10	HALLMARK_APICAL_SURFACE	0.0762086	8.85e-15
SRSF5	HALLMARK_MYOGENESIS	0.0763044	8.19e-15
SRSF6	HALLMARK_APICAL_SURFACE	0.0764006	7.58e-15
SRSF4	HALLMARK_APICAL_JUNCTION	0.076592	6.5e-15
SRSF4	HALLMARK_DNA_REPAIR	0.0777293	2.57e-15
SRSF5	HALLMARK_TGF_BETA_SIGNALING	0.0792111	7.55e-16
SRSF10	HALLMARK_ESTROGEN_RESPONSE_EARLY	0.0795766	5.56e-16
SRSF8	HALLMARK_DNA_REPAIR	0.0797906	4.65e-16
SRSF1	HALLMARK_WNT_BETA_CATENIN_SIGNALING	0.080452	2.66e-16
SRSF6	HALLMARK_KRAS_SIGNALING_DN	0.0818356	8.14e-17
SRSF5	HALLMARK_UV_RESPONSE_UP	0.0823857	5.05e-17
SRSF8	HALLMARK_ESTROGEN_RESPONSE_LATE	0.0827925	3.55e-17
SRSF10	HALLMARK_MTORC1_SIGNALING	0.0836983	1.6e-17
SRSF9	HALLMARK_UNFOLDED_PROTEIN_RESPONSE	0.0859152	2.21e-18
SRSF4	HALLMARK_INTERFERON_ALPHA_RESPONSE	0.0863907	1.44e-18
SRSF8	HALLMARK_PANCREAS_BETA_CELLS	0.0865506	1.24e-18
SRSF11	HALLMARK_ESTROGEN_RESPONSE_EARLY	0.0868838	9.16e-19
SRSF6	HALLMARK_PROTEIN_SECRETION	0.0877039	4.31e-19
SRSF5	HALLMARK_IL2_STAT5_SIGNALING	0.0879801	3.34e-19
SRSF2	HALLMARK_PI3K_AKT_MTOR_SIGNALING	0.092164	6.31e-21
SRSF7	HALLMARK_PI3K_AKT_MTOR_SIGNALING	0.0922693	5.7e-21
SRSF5	HALLMARK_P53_PATHWAY	0.0947401	5e-22
SRSF7	HALLMARK_IL2_STAT5_SIGNALING	0.0947811	4.8e-22
SRSF3	HALLMARK_PI3K_AKT_MTOR_SIGNALING	0.0950546	3.65e-22
SRSF3	HALLMARK_WNT_BETA_CATENIN_SIGNALING	0.0960441	1.35e-22
SRSF9	HALLMARK_WNT_BETA_CATENIN_SIGNALING	0.0986864	9e-24
SRSF11	HALLMARK_IL2_STAT5_SIGNALING	0.0994163	4.2e-24
SRSF8	HALLMARK_PEROXISOME	0.0994963	3.87e-24
SRSF12	HALLMARK_PEROXISOME	0.0995472	3.67e-24
SRSF10	HALLMARK_KRAS_SIGNALING_UP	0.101777	3.45e-25
SRSF7	HALLMARK_INTERFERON_GAMMA_RESPONSE	0.102573	1.47e-25
SRSF12	HALLMARK_PROTEIN_SECRETION	0.104704	1.43e-26
SRSF8	HALLMARK_APOPTOSIS	0.104945	1.1e-26
SRSF6	HALLMARK_HEME_METABOLISM	0.105921	3.72e-27
SRSF9	HALLMARK_ESTROGEN_RESPONSE_EARLY	0.105959	3.56e-27
SRSF8	HALLMARK_OXIDATIVE_PHOSPHORYLATION	0.107719	4.92e-28
SRSF5	HALLMARK_ESTROGEN_RESPONSE_EARLY	0.108363	2.36e-28
SRSF11	HALLMARK_ALLOGRAFT_REJECTION	0.109467	6.66e-29
SRSF6	HALLMARK_UNFOLDED_PROTEIN_RESPONSE	0.109718	4.98e-29
SRSF8	HALLMARK_HEME_METABOLISM	0.109753	4.79e-29
SRSF2	HALLMARK_INTERFERON_ALPHA_RESPONSE	0.109836	4.35e-29
SRSF11	HALLMARK_ANDROGEN_RESPONSE	0.110513	1.98e-29
SRSF11	HALLMARK_KRAS_SIGNALING_DN	0.111912	3.85e-30
SRSF10	HALLMARK_INTERFERON_GAMMA_RESPONSE	0.112015	3.41e-30
SRSF4	HALLMARK_MYC_TARGETS_V2	0.113734	4.41e-31
SRSF10	HALLMARK_MYC_TARGETS_V2	0.113775	4.2e-31
SRSF3	HALLMARK_IL6_JAK_STAT3_SIGNALING	0.115551	4.92e-32
SRSF1	HALLMARK_INFLAMMATORY_RESPONSE	0.115846	3.43e-32
SRSF5	HALLMARK_FATTY_ACID_METABOLISM	0.116694	1.21e-32
SRSF4	HALLMARK_APICAL_SURFACE	0.116971	8.62e-33
SRSF4	HALLMARK_APOPTOSIS	0.117389	5.15e-33
SRSF7	HALLMARK_APICAL_SURFACE	0.117795	3.11e-33
SRSF11	HALLMARK_INFLAMMATORY_RESPONSE	0.118362	1.54e-33
SRSF12	HALLMARK_PANCREAS_BETA_CELLS	0.120179	1.56e-34
SRSF4	HALLMARK_INTERFERON_GAMMA_RESPONSE	0.12208	1.38e-35
SRSF9	HALLMARK_APICAL_SURFACE	0.123445	2.36e-36
SRSF5	HALLMARK_APICAL_JUNCTION	0.124851	3.73e-37
SRSF9	HALLMARK_P53_PATHWAY	0.125879	9.59e-38
SRSF12	HALLMARK_KRAS_SIGNALING_UP	0.127104	1.87e-38
SRSF11	HALLMARK_UV_RESPONSE_DN	0.127682	8.58e-39
SRSF4	HALLMARK_PI3K_AKT_MTOR_SIGNALING	0.127993	5.64e-39
SRSF5	HALLMARK_SPERMATOGENESIS	0.128255	3.96e-39
SRSF7	HALLMARK_WNT_BETA_CATENIN_SIGNALING	0.12992	4.09e-40
SRSF5	HALLMARK_HEDGEHOG_SIGNALING	0.130386	2.16e-40
SRSF11	HALLMARK_KRAS_SIGNALING_UP	0.130564	1.69e-40
SRSF5	HALLMARK_UV_RESPONSE_DN	0.131511	4.55e-41
SRSF4	HALLMARK_WNT_BETA_CATENIN_SIGNALING	0.131774	3.16e-41
SRSF4	HALLMARK_IL6_JAK_STAT3_SIGNALING	0.135235	2.39e-43
SRSF8	HALLMARK_KRAS_SIGNALING_UP	0.136023	7.72e-44
SRSF5	HALLMARK_ADIPOGENESIS	0.136906	2.16e-44
SRSF3	HALLMARK_DNA_REPAIR	0.136917	2.13e-44
SRSF7	HALLMARK_MTORC1_SIGNALING	0.138383	2.52e-45
SRSF8	HALLMARK_UNFOLDED_PROTEIN_RESPONSE	0.139362	5.97e-46
SRSF4	HALLMARK_P53_PATHWAY	0.139602	4.19e-46
SRSF3	HALLMARK_APICAL_SURFACE	0.13999	2.36e-46
SRSF1	HALLMARK_PI3K_AKT_MTOR_SIGNALING	0.140083	2.06e-46
SRSF10	HALLMARK_IL2_STAT5_SIGNALING	0.141287	3.42e-47
SRSF2	HALLMARK_INTERFERON_GAMMA_RESPONSE	0.141703	1.83e-47
SRSF4	HALLMARK_TNFA_SIGNALING_VIA_NFKB	0.145902	3.07e-50
SRSF2	HALLMARK_DNA_REPAIR	0.15086	1.26e-53
SRSF4	HALLMARK_INFLAMMATORY_RESPONSE	0.152834	5.22e-55
SRSF7	HALLMARK_DNA_REPAIR	0.152935	4.43e-55
SRSF10	HALLMARK_KRAS_SIGNALING_DN	0.152937	4.41e-55
SRSF1	HALLMARK_ESTROGEN_RESPONSE_EARLY	0.153242	2.69e-55
SRSF12	HALLMARK_TGF_BETA_SIGNALING	0.155236	1.03e-56
SRSF5	HALLMARK_WNT_BETA_CATENIN_SIGNALING	0.155754	4.36e-57
SRSF1	HALLMARK_ALLOGRAFT_REJECTION	0.156311	1.73e-57
SRSF3	HALLMARK_INFLAMMATORY_RESPONSE	0.156707	8.98e-58
SRSF11	HALLMARK_TGF_BETA_SIGNALING	0.159083	1.66e-59
SRSF10	HALLMARK_IL6_JAK_STAT3_SIGNALING	0.160793	9.08e-61
SRSF2	HALLMARK_APICAL_SURFACE	0.16136	3.43e-61
SRSF10	HALLMARK_ESTROGEN_RESPONSE_LATE	0.161745	1.77e-61
SRSF5	HALLMARK_PEROXISOME	0.162358	6.16e-62
SRSF11	HALLMARK_PROTEIN_SECRETION	0.166413	5.09e-65
SRSF7	HALLMARK_IL6_JAK_STAT3_SIGNALING	0.168216	2.05e-66
SRSF4	HALLMARK_IL2_STAT5_SIGNALING	0.168408	1.45e-66
SRSF12	HALLMARK_DNA_REPAIR	0.171275	8.04e-69
SRSF5	HALLMARK_PROTEIN_SECRETION	0.172449	9.33e-70
SRSF9	HALLMARK_SPERMATOGENESIS	0.17305	3.08e-70
SRSF10	HALLMARK_PI3K_AKT_MTOR_SIGNALING	0.173127	2.67e-70
SRSF8	HALLMARK_APICAL_JUNCTION	0.174436	2.35e-71
SRSF9	HALLMARK_DNA_REPAIR	0.175651	2.43e-72
SRSF6	HALLMARK_MYC_TARGETS_V2	0.176007	1.24e-72
SRSF4	HALLMARK_ALLOGRAFT_REJECTION	0.179278	2.49e-75
SRSF8	HALLMARK_ESTROGEN_RESPONSE_EARLY	0.1793	2.39e-75
SRSF9	HALLMARK_MITOTIC_SPINDLE	0.181211	5.98e-77
SRSF3	HALLMARK_MTORC1_SIGNALING	0.181927	1.49e-77
SRSF2	HALLMARK_IL6_JAK_STAT3_SIGNALING	0.182178	9.12e-78
SRSF7	HALLMARK_INFLAMMATORY_RESPONSE	0.185165	2.55e-80
SRSF6	HALLMARK_DNA_REPAIR	0.18522	2.29e-80
SRSF8	HALLMARK_WNT_BETA_CATENIN_SIGNALING	0.186754	1.07e-81
SRSF4	HALLMARK_KRAS_SIGNALING_DN	0.188569	2.77e-83
SRSF2	HALLMARK_ESTROGEN_RESPONSE_LATE	0.189072	1e-83
SRSF11	HALLMARK_E2F_TARGETS	0.189469	4.46e-84
SRSF8	HALLMARK_ADIPOGENESIS	0.189821	2.18e-84
SRSF8	HALLMARK_PI3K_AKT_MTOR_SIGNALING	0.190091	1.26e-84
SRSF6	HALLMARK_WNT_BETA_CATENIN_SIGNALING	0.192538	8.22e-87
SRSF12	HALLMARK_HYPOXIA	0.194039	3.63e-88
SRSF4	HALLMARK_SPERMATOGENESIS	0.196013	5.77e-90
SRSF5	HALLMARK_DNA_REPAIR	0.198574	2.5e-92
SRSF6	HALLMARK_ANDROGEN_RESPONSE	0.203087	1.42e-96
SRSF9	HALLMARK_KRAS_SIGNALING_DN	0.203664	4.01e-97
SRSF9	HALLMARK_GLYCOLYSIS	0.204642	4.65e-98
SRSF8	HALLMARK_HEDGEHOG_SIGNALING	0.206859	3.37e-100
SRSF12	HALLMARK_UV_RESPONSE_DN	0.208259	1.45e-101
SRSF2	HALLMARK_MTORC1_SIGNALING	0.209375	1.17e-102
SRSF3	HALLMARK_ALLOGRAFT_REJECTION	0.210714	5.56e-104
SRSF2	HALLMARK_INFLAMMATORY_RESPONSE	0.210957	3.19e-104
SRSF6	HALLMARK_E2F_TARGETS	0.211762	5.06e-105
SRSF12	HALLMARK_NOTCH_SIGNALING	0.214049	2.58e-107
SRSF1	HALLMARK_APICAL_SURFACE	0.214913	3.46e-108
SRSF10	HALLMARK_INFLAMMATORY_RESPONSE	0.215042	2.56e-108
SRSF10	HALLMARK_ALLOGRAFT_REJECTION	0.219534	6.41e-113
SRSF1	HALLMARK_MTORC1_SIGNALING	0.220223	1.23e-113
SRSF12	HALLMARK_MYOGENESIS	0.223759	2.41e-117
SRSF11	HALLMARK_G2M_CHECKPOINT	0.223875	1.82e-117
SRSF5	HALLMARK_ANDROGEN_RESPONSE	0.224417	4.83e-118
SRSF11	HALLMARK_PI3K_AKT_MTOR_SIGNALING	0.227412	3.03e-121
SRSF1	HALLMARK_KRAS_SIGNALING_DN	0.230524	1.27e-124
SRSF3	HALLMARK_KRAS_SIGNALING_DN	0.231355	1.56e-125
SRSF6	HALLMARK_G2M_CHECKPOINT	0.236154	7.31e-131
SRSF7	HALLMARK_KRAS_SIGNALING_DN	0.238409	2.07e-133
SRSF6	HALLMARK_ESTROGEN_RESPONSE_EARLY	0.238651	1.1e-133
SRSF6	HALLMARK_ESTROGEN_RESPONSE_LATE	0.239127	3.17e-134
SRSF12	HALLMARK_MITOTIC_SPINDLE	0.245464	1.49e-141
SRSF9	HALLMARK_ESTROGEN_RESPONSE_LATE	0.245888	4.75e-142
SRSF3	HALLMARK_SPERMATOGENESIS	0.246861	3.39e-143
SRSF3	HALLMARK_ESTROGEN_RESPONSE_LATE	0.24827	7.27e-145
SRSF6	HALLMARK_SPERMATOGENESIS	0.25138	1.38e-148
SRSF7	HALLMARK_ESTROGEN_RESPONSE_LATE	0.253092	1.17e-150
SRSF7	HALLMARK_ALLOGRAFT_REJECTION	0.254296	4.02e-152
SRSF6	HALLMARK_PI3K_AKT_MTOR_SIGNALING	0.256807	3.32e-155
SRSF2	HALLMARK_ALLOGRAFT_REJECTION	0.259533	1.37e-158
SRSF6	HALLMARK_MYC_TARGETS_V1	0.259798	6.37e-159
SRSF11	HALLMARK_MYC_TARGETS_V1	0.267146	2.9e-168
SRSF1	HALLMARK_SPERMATOGENESIS	0.267931	2.8e-169
SRSF9	HALLMARK_MTORC1_SIGNALING	0.268643	3.34e-170
SRSF2	HALLMARK_KRAS_SIGNALING_DN	0.269996	5.75e-172
SRSF6	HALLMARK_MITOTIC_SPINDLE	0.272841	1.04e-175
SRSF12	HALLMARK_PI3K_AKT_MTOR_SIGNALING	0.273045	5.58e-176
SRSF8	HALLMARK_UV_RESPONSE_DN	0.275078	1.1e-178
SRSF11	HALLMARK_SPERMATOGENESIS	0.275961	7.24e-180
SRSF1	HALLMARK_ESTROGEN_RESPONSE_LATE	0.280799	2.03e-186
SRSF4	HALLMARK_E2F_TARGETS	0.284336	2.7e-191
SRSF5	HALLMARK_HEME_METABOLISM	0.292523	7.39e-203
SRSF9	HALLMARK_MYC_TARGETS_V1	0.295583	2.8e-207
SRSF4	HALLMARK_G2M_CHECKPOINT	0.296927	3.08e-209
SRSF4	HALLMARK_MITOTIC_SPINDLE	0.309237	1.12e-227
SRSF12	HALLMARK_HEME_METABOLISM	0.31313	1.06e-233
SRSF4	HALLMARK_MYC_TARGETS_V1	0.313286	6.09e-234
SRSF12	HALLMARK_APICAL_JUNCTION	0.315542	1.78e-237
SRSF1	HALLMARK_MYC_TARGETS_V2	0.317151	5.17e-240
SRSF7	HALLMARK_SPERMATOGENESIS	0.321623	3.75e-247
SRSF8	HALLMARK_TGF_BETA_SIGNALING	0.322844	4.03e-249
SRSF2	HALLMARK_SPERMATOGENESIS	0.328071	1.16e-257
SRSF3	HALLMARK_MITOTIC_SPINDLE	0.329372	8.19e-260
SRSF7	HALLMARK_MITOTIC_SPINDLE	0.340981	1.74e-279
SRSF10	HALLMARK_MYC_TARGETS_V1	0.34282	1.11e-282
SRSF3	HALLMARK_MYC_TARGETS_V2	0.348453	1.33e-292
SRSF9	HALLMARK_G2M_CHECKPOINT	0.354955	2.6e-304
SRSF11	HALLMARK_MITOTIC_SPINDLE	0.359656	5.94854034007196e-313
SRSF12	HALLMARK_WNT_BETA_CATENIN_SIGNALING	0.360762	5.25067065526397e-315
SRSF8	HALLMARK_ANDROGEN_RESPONSE	0.364405	7.90505033345994e-322
SRSF9	HALLMARK_E2F_TARGETS	0.364684	2.37151510003798e-322
SRSF9	HALLMARK_MYC_TARGETS_V2	0.365553	0
SRSF5	HALLMARK_PI3K_AKT_MTOR_SIGNALING	0.371123	0
SRSF10	HALLMARK_SPERMATOGENESIS	0.373011	0
SRSF8	HALLMARK_PROTEIN_SECRETION	0.381457	0
SRSF8	HALLMARK_NOTCH_SIGNALING	0.383308	0
SRSF12	HALLMARK_UV_RESPONSE_UP	0.384656	0
SRSF1	HALLMARK_MYC_TARGETS_V1	0.3865	0
SRSF7	HALLMARK_MYC_TARGETS_V2	0.401198	0
SRSF2	HALLMARK_MYC_TARGETS_V2	0.402329	0
SRSF2	HALLMARK_MYC_TARGETS_V1	0.406808	0
SRSF2	HALLMARK_MITOTIC_SPINDLE	0.408166	0
SRSF10	HALLMARK_E2F_TARGETS	0.434466	0
SRSF3	HALLMARK_MYC_TARGETS_V1	0.450285	0
SRSF10	HALLMARK_MITOTIC_SPINDLE	0.462818	0
SRSF1	HALLMARK_MITOTIC_SPINDLE	0.465099	0
SRSF7	HALLMARK_MYC_TARGETS_V1	0.472402	0
SRSF10	HALLMARK_G2M_CHECKPOINT	0.476028	0
SRSF12	HALLMARK_HEDGEHOG_SIGNALING	0.528656	0
SRSF3	HALLMARK_E2F_TARGETS	0.541622	0
SRSF1	HALLMARK_E2F_TARGETS	0.543256	0
SRSF7	HALLMARK_E2F_TARGETS	0.54504	0
SRSF3	HALLMARK_G2M_CHECKPOINT	0.554563	0
SRSF7	HALLMARK_G2M_CHECKPOINT	0.554798	0
SRSF1	HALLMARK_G2M_CHECKPOINT	0.577054	0
SRSF2	HALLMARK_E2F_TARGETS	0.599497	0
SRSF2	HALLMARK_G2M_CHECKPOINT	0.600568	0
