# Supplementary material for: Molecular characteristics and clinical implications of serine/arginine-rich splicing factors in human cancer
Source: Aging (Albany NY). 2023 Nov 24;15(22):13287–311. doi: 10.18632/aging.205241 (PMC10713412; doi:10.18632/aging.205241)
Supplement: Supplementary Table 5 [file aging-15-205241-s006.xls]

## Sheet: Table S5
Supplementary Table 5. The correlation of SRSFs with hallmark pathways in specific cancer types.
Cancer_types	SRSFs	Hallmark pathways	cor	pvalue
ACC	SRSF1	HALLMARK_ADIPOGENESIS	-0.421677	0.000108684
ACC	SRSF1	HALLMARK_APICAL_JUNCTION	0.250596	0.0259126
ACC	SRSF1	HALLMARK_APICAL_SURFACE	0.439407	5.09e-05
ACC	SRSF1	HALLMARK_APOPTOSIS	-0.315868	0.00457205
ACC	SRSF1	HALLMARK_COMPLEMENT	-0.387102	0.000424669
ACC	SRSF1	HALLMARK_DNA_REPAIR	0.249436	0.0266325
ACC	SRSF1	HALLMARK_E2F_TARGETS	0.382166	0.000509824
ACC	SRSF1	HALLMARK_ESTROGEN_RESPONSE_EARLY	0.252641	0.0246844
ACC	SRSF1	HALLMARK_ESTROGEN_RESPONSE_LATE	0.22721	0.0440391
ACC	SRSF1	HALLMARK_FATTY_ACID_METABOLISM	-0.277214	0.0133857
ACC	SRSF1	HALLMARK_G2M_CHECKPOINT	0.400036	0.000259499
ACC	SRSF1	HALLMARK_HEDGEHOG_SIGNALING	0.288772	0.00985184
ACC	SRSF1	HALLMARK_IL2_STAT5_SIGNALING	-0.298119	0.0076197
ACC	SRSF1	HALLMARK_IL6_JAK_STAT3_SIGNALING	-0.237982	0.0346895
ACC	SRSF1	HALLMARK_INTERFERON_ALPHA_RESPONSE	-0.306809	0.0059564
ACC	SRSF1	HALLMARK_INTERFERON_GAMMA_RESPONSE	-0.29508	0.00829085
ACC	SRSF1	HALLMARK_KRAS_SIGNALING_DN	0.324319	0.00354646
ACC	SRSF1	HALLMARK_KRAS_SIGNALING_UP	-0.240979	0.0324061
ACC	SRSF1	HALLMARK_MITOTIC_SPINDLE	0.300796	0.00706848
ACC	SRSF1	HALLMARK_MYC_TARGETS_V1	0.339855	0.00218169
ACC	SRSF1	HALLMARK_MYC_TARGETS_V2	0.365481	0.000926113
ACC	SRSF1	HALLMARK_MYOGENESIS	0.413155	0.000154194
ACC	SRSF1	HALLMARK_OXIDATIVE_PHOSPHORYLATION	-0.339855	0.00218169
ACC	SRSF1	HALLMARK_P53_PATHWAY	-0.264224	0.0186216
ACC	SRSF1	HALLMARK_PANCREAS_BETA_CELLS	-0.306319	0.00604082
ACC	SRSF1	HALLMARK_PROTEIN_SECRETION	-0.376325	0.000630583
ACC	SRSF1	HALLMARK_REACTIVE_OXYGEN_SPECIES_PATHWAY	-0.439952	4.97e-05
ACC	SRSF1	HALLMARK_WNT_BETA_CATENIN_SIGNALING	0.353429	0.00139799
ACC	SRSF10	HALLMARK_ADIPOGENESIS	-0.286198	0.0105589
ACC	SRSF10	HALLMARK_ALLOGRAFT_REJECTION	-0.252132	0.0249856
ACC	SRSF10	HALLMARK_APOPTOSIS	-0.230963	0.0405697
ACC	SRSF10	HALLMARK_E2F_TARGETS	0.412394	0.000159019
ACC	SRSF10	HALLMARK_ESTROGEN_RESPONSE_EARLY	0.380558	0.000540754
ACC	SRSF10	HALLMARK_G2M_CHECKPOINT	0.417103	0.000131282
ACC	SRSF10	HALLMARK_HYPOXIA	-0.231604	0.0400007
ACC	SRSF10	HALLMARK_INTERFERON_ALPHA_RESPONSE	-0.242727	0.0311338
ACC	SRSF10	HALLMARK_MITOTIC_SPINDLE	0.490466	4.46e-06
ACC	SRSF10	HALLMARK_MYC_TARGETS_V1	0.287089	0.0103093
ACC	SRSF10	HALLMARK_OXIDATIVE_PHOSPHORYLATION	-0.287089	0.0103093
ACC	SRSF10	HALLMARK_P53_PATHWAY	-0.271495	0.0155082
ACC	SRSF10	HALLMARK_REACTIVE_OXYGEN_SPECIES_PATHWAY	-0.512246	1.4e-06
ACC	SRSF11	HALLMARK_ADIPOGENESIS	-0.404625	0.000216825
ACC	SRSF11	HALLMARK_APICAL_JUNCTION	0.239917	0.0332005
ACC	SRSF11	HALLMARK_APOPTOSIS	-0.22327	0.047942
ACC	SRSF11	HALLMARK_CHOLESTEROL_HOMEOSTASIS	-0.271683	0.0154343
ACC	SRSF11	HALLMARK_E2F_TARGETS	0.39958	0.000264136
ACC	SRSF11	HALLMARK_FATTY_ACID_METABOLISM	-0.407061	0.0001969
ACC	SRSF11	HALLMARK_G2M_CHECKPOINT	0.424601	9.62e-05
ACC	SRSF11	HALLMARK_HEDGEHOG_SIGNALING	0.253183	0.0243673
ACC	SRSF11	HALLMARK_HEME_METABOLISM	-0.249386	0.0266638
ACC	SRSF11	HALLMARK_INTERFERON_ALPHA_RESPONSE	-0.331229	0.00286594
ACC	SRSF11	HALLMARK_MITOTIC_SPINDLE	0.470814	1.19e-05
ACC	SRSF11	HALLMARK_MYC_TARGETS_V1	0.369499	0.000804411
ACC	SRSF11	HALLMARK_MYC_TARGETS_V2	0.258289	0.0215458
ACC	SRSF11	HALLMARK_OXIDATIVE_PHOSPHORYLATION	-0.369499	0.000804411
ACC	SRSF11	HALLMARK_P53_PATHWAY	-0.510553	1.53e-06
ACC	SRSF11	HALLMARK_PEROXISOME	-0.228022	0.0432685
ACC	SRSF11	HALLMARK_REACTIVE_OXYGEN_SPECIES_PATHWAY	-0.539202	2.94e-07
ACC	SRSF11	HALLMARK_WNT_BETA_CATENIN_SIGNALING	0.254408	0.0236634
ACC	SRSF12	HALLMARK_ADIPOGENESIS	-0.271443	0.015529
ACC	SRSF12	HALLMARK_APICAL_SURFACE	0.317863	0.00430868
ACC	SRSF12	HALLMARK_COMPLEMENT	-0.276435	0.0136591
ACC	SRSF12	HALLMARK_FATTY_ACID_METABOLISM	-0.283051	0.0114835
ACC	SRSF12	HALLMARK_KRAS_SIGNALING_DN	0.293849	0.00857729
ACC	SRSF12	HALLMARK_MTORC1_SIGNALING	0.240155	0.0330213
ACC	SRSF12	HALLMARK_MYC_TARGETS_V1	0.324966	0.00347705
ACC	SRSF12	HALLMARK_MYOGENESIS	0.264288	0.0185917
ACC	SRSF12	HALLMARK_OXIDATIVE_PHOSPHORYLATION	-0.324966	0.00347705
ACC	SRSF12	HALLMARK_PANCREAS_BETA_CELLS	-0.308715	0.00563773
ACC	SRSF12	HALLMARK_REACTIVE_OXYGEN_SPECIES_PATHWAY	-0.23163	0.0399772
ACC	SRSF12	HALLMARK_WNT_BETA_CATENIN_SIGNALING	0.307885	0.00577444
ACC	SRSF2	HALLMARK_ADIPOGENESIS	-0.492332	4.05e-06
ACC	SRSF2	HALLMARK_ANDROGEN_RESPONSE	-0.22948	0.0419121
ACC	SRSF2	HALLMARK_APICAL_SURFACE	0.290048	0.00951672
ACC	SRSF2	HALLMARK_APOPTOSIS	-0.31031	0.00538262
ACC	SRSF2	HALLMARK_COMPLEMENT	-0.339727	0.00219071
ACC	SRSF2	HALLMARK_E2F_TARGETS	0.503325	2.27e-06
ACC	SRSF2	HALLMARK_ESTROGEN_RESPONSE_EARLY	0.251597	0.0253052
ACC	SRSF2	HALLMARK_FATTY_ACID_METABOLISM	-0.375164	0.000657498
ACC	SRSF2	HALLMARK_G2M_CHECKPOINT	0.525961	6.43e-07
ACC	SRSF2	HALLMARK_HEME_METABOLISM	-0.275555	0.0139739
ACC	SRSF2	HALLMARK_INTERFERON_ALPHA_RESPONSE	-0.262736	0.0193209
ACC	SRSF2	HALLMARK_INTERFERON_GAMMA_RESPONSE	-0.24538	0.0292826
ACC	SRSF2	HALLMARK_KRAS_SIGNALING_DN	0.256257	0.0226332
ACC	SRSF2	HALLMARK_MITOTIC_SPINDLE	0.375181	0.000657101
ACC	SRSF2	HALLMARK_MYC_TARGETS_V1	0.516086	1.13e-06
ACC	SRSF2	HALLMARK_MYC_TARGETS_V2	0.381723	0.000518179
ACC	SRSF2	HALLMARK_MYOGENESIS	0.261994	0.0196778
ACC	SRSF2	HALLMARK_OXIDATIVE_PHOSPHORYLATION	-0.516086	1.13e-06
ACC	SRSF2	HALLMARK_P53_PATHWAY	-0.414024	0.000148855
ACC	SRSF2	HALLMARK_PANCREAS_BETA_CELLS	-0.233794	0.0381058
ACC	SRSF2	HALLMARK_PI3K_AKT_MTOR_SIGNALING	-0.253401	0.0242408
ACC	SRSF2	HALLMARK_PROTEIN_SECRETION	-0.384132	0.00047419
ACC	SRSF2	HALLMARK_REACTIVE_OXYGEN_SPECIES_PATHWAY	-0.532677	4.35e-07
ACC	SRSF2	HALLMARK_WNT_BETA_CATENIN_SIGNALING	0.262055	0.0196483
ACC	SRSF3	HALLMARK_ADIPOGENESIS	-0.521669	8.22e-07
ACC	SRSF3	HALLMARK_ANDROGEN_RESPONSE	-0.238329	0.0344188
ACC	SRSF3	HALLMARK_APICAL_SURFACE	0.24234	0.0314116
ACC	SRSF3	HALLMARK_APOPTOSIS	-0.240791	0.0325459
ACC	SRSF3	HALLMARK_COAGULATION	0.22686	0.0443745
ACC	SRSF3	HALLMARK_COMPLEMENT	-0.284601	0.0110196
ACC	SRSF3	HALLMARK_E2F_TARGETS	0.523276	7.5e-07
ACC	SRSF3	HALLMARK_EPITHELIAL_MESENCHYMAL_TRANSITION	0.225873	0.0453328
ACC	SRSF3	HALLMARK_ESTROGEN_RESPONSE_EARLY	0.277044	0.0134448
ACC	SRSF3	HALLMARK_ESTROGEN_RESPONSE_LATE	0.236443	0.0359143
ACC	SRSF3	HALLMARK_FATTY_ACID_METABOLISM	-0.418481	0.000124057
ACC	SRSF3	HALLMARK_G2M_CHECKPOINT	0.534729	3.85e-07
ACC	SRSF3	HALLMARK_HEME_METABOLISM	-0.300587	0.00711011
ACC	SRSF3	HALLMARK_MITOTIC_SPINDLE	0.370982	0.000763329
ACC	SRSF3	HALLMARK_MTORC1_SIGNALING	0.262244	0.0195567
ACC	SRSF3	HALLMARK_MYC_TARGETS_V1	0.549614	1.56e-07
ACC	SRSF3	HALLMARK_MYC_TARGETS_V2	0.435856	5.95e-05
ACC	SRSF3	HALLMARK_OXIDATIVE_PHOSPHORYLATION	-0.549614	1.56e-07
ACC	SRSF3	HALLMARK_P53_PATHWAY	-0.430344	7.54e-05
ACC	SRSF3	HALLMARK_PI3K_AKT_MTOR_SIGNALING	-0.323883	0.00359383
ACC	SRSF3	HALLMARK_PROTEIN_SECRETION	-0.453759	2.67e-05
ACC	SRSF3	HALLMARK_REACTIVE_OXYGEN_SPECIES_PATHWAY	-0.587287	1.28e-08
ACC	SRSF4	HALLMARK_ADIPOGENESIS	-0.491832	4.16e-06
ACC	SRSF4	HALLMARK_BILE_ACID_METABOLISM	-0.373908	0.000687767
ACC	SRSF4	HALLMARK_CHOLESTEROL_HOMEOSTASIS	-0.314414	0.00477288
ACC	SRSF4	HALLMARK_E2F_TARGETS	0.366319	0.000899445
ACC	SRSF4	HALLMARK_EPITHELIAL_MESENCHYMAL_TRANSITION	0.338995	0.00224262
ACC	SRSF4	HALLMARK_FATTY_ACID_METABOLISM	-0.476695	8.95e-06
ACC	SRSF4	HALLMARK_G2M_CHECKPOINT	0.369837	0.000794882
ACC	SRSF4	HALLMARK_HEDGEHOG_SIGNALING	0.233834	0.0380715
ACC	SRSF4	HALLMARK_HEME_METABOLISM	-0.42137	0.000110083
ACC	SRSF4	HALLMARK_INFLAMMATORY_RESPONSE	0.303805	0.00649086
ACC	SRSF4	HALLMARK_MITOTIC_SPINDLE	0.298074	0.00762927
ACC	SRSF4	HALLMARK_MYC_TARGETS_V1	0.342107	0.00202918
ACC	SRSF4	HALLMARK_MYC_TARGETS_V2	0.347543	0.00169967
ACC	SRSF4	HALLMARK_OXIDATIVE_PHOSPHORYLATION	-0.342107	0.00202918
ACC	SRSF4	HALLMARK_P53_PATHWAY	-0.330558	0.00292648
ACC	SRSF4	HALLMARK_PEROXISOME	-0.395815	0.000305423
ACC	SRSF4	HALLMARK_PI3K_AKT_MTOR_SIGNALING	-0.24238	0.0313825
ACC	SRSF4	HALLMARK_PROTEIN_SECRETION	-0.238992	0.033906
ACC	SRSF4	HALLMARK_REACTIVE_OXYGEN_SPECIES_PATHWAY	-0.404275	0.00021984
ACC	SRSF4	HALLMARK_UNFOLDED_PROTEIN_RESPONSE	0.249114	0.026835
ACC	SRSF4	HALLMARK_XENOBIOTIC_METABOLISM	-0.403636	0.000225436
ACC	SRSF5	HALLMARK_ALLOGRAFT_REJECTION	-0.34627	0.00177218
ACC	SRSF5	HALLMARK_ANGIOGENESIS	-0.329195	0.003053
ACC	SRSF5	HALLMARK_APICAL_SURFACE	0.276	0.013814
ACC	SRSF5	HALLMARK_APOPTOSIS	-0.343552	0.00193642
ACC	SRSF5	HALLMARK_COMPLEMENT	-0.545808	1.97e-07
ACC	SRSF5	HALLMARK_ESTROGEN_RESPONSE_EARLY	0.498639	2.91e-06
ACC	SRSF5	HALLMARK_ESTROGEN_RESPONSE_LATE	0.312086	0.00511088
ACC	SRSF5	HALLMARK_HEDGEHOG_SIGNALING	0.474076	1.02e-05
ACC	SRSF5	HALLMARK_IL2_STAT5_SIGNALING	-0.359284	0.00114678
ACC	SRSF5	HALLMARK_IL6_JAK_STAT3_SIGNALING	-0.328353	0.00313352
ACC	SRSF5	HALLMARK_INTERFERON_GAMMA_RESPONSE	-0.338554	0.00227448
ACC	SRSF5	HALLMARK_KRAS_SIGNALING_DN	0.289267	0.00972055
ACC	SRSF5	HALLMARK_PANCREAS_BETA_CELLS	-0.261976	0.0196863
ACC	SRSF5	HALLMARK_PEROXISOME	0.232303	0.0393871
ACC	SRSF5	HALLMARK_UNFOLDED_PROTEIN_RESPONSE	0.264841	0.018338
ACC	SRSF5	HALLMARK_UV_RESPONSE_DN	0.253742	0.0240441
ACC	SRSF5	HALLMARK_WNT_BETA_CATENIN_SIGNALING	0.319539	0.004098
ACC	SRSF6	HALLMARK_ALLOGRAFT_REJECTION	-0.293348	0.0086962
ACC	SRSF6	HALLMARK_APICAL_SURFACE	0.286537	0.0104635
ACC	SRSF6	HALLMARK_APOPTOSIS	-0.265771	0.0179177
ACC	SRSF6	HALLMARK_COMPLEMENT	-0.324522	0.00352457
ACC	SRSF6	HALLMARK_DNA_REPAIR	0.294425	0.00844232
ACC	SRSF6	HALLMARK_E2F_TARGETS	0.321832	0.00382447
ACC	SRSF6	HALLMARK_ESTROGEN_RESPONSE_EARLY	0.3512	0.00150601
ACC	SRSF6	HALLMARK_ESTROGEN_RESPONSE_LATE	0.239619	0.0334264
ACC	SRSF6	HALLMARK_G2M_CHECKPOINT	0.34485	0.00185636
ACC	SRSF6	HALLMARK_IL2_STAT5_SIGNALING	-0.326319	0.00333605
ACC	SRSF6	HALLMARK_IL6_JAK_STAT3_SIGNALING	-0.230886	0.0406385
ACC	SRSF6	HALLMARK_INTERFERON_GAMMA_RESPONSE	-0.25898	0.0211867
ACC	SRSF6	HALLMARK_MITOTIC_SPINDLE	0.342606	0.00199668
ACC	SRSF6	HALLMARK_MYC_TARGETS_V1	0.225696	0.0455064
ACC	SRSF6	HALLMARK_MYC_TARGETS_V2	0.235516	0.0366686
ACC	SRSF6	HALLMARK_OXIDATIVE_PHOSPHORYLATION	-0.225696	0.0455064
ACC	SRSF6	HALLMARK_P53_PATHWAY	-0.233294	0.0385312
ACC	SRSF6	HALLMARK_REACTIVE_OXYGEN_SPECIES_PATHWAY	-0.308486	0.00567519
ACC	SRSF6	HALLMARK_WNT_BETA_CATENIN_SIGNALING	0.311719	0.005166
ACC	SRSF7	HALLMARK_ADIPOGENESIS	-0.524498	7e-07
ACC	SRSF7	HALLMARK_ANDROGEN_RESPONSE	-0.28958	0.00963851
ACC	SRSF7	HALLMARK_APICAL_SURFACE	0.316818	0.00444489
ACC	SRSF7	HALLMARK_APOPTOSIS	-0.275266	0.0140784
ACC	SRSF7	HALLMARK_BILE_ACID_METABOLISM	-0.225393	0.0458054
ACC	SRSF7	HALLMARK_COMPLEMENT	-0.282898	0.0115302
ACC	SRSF7	HALLMARK_E2F_TARGETS	0.5454	2.02e-07
ACC	SRSF7	HALLMARK_EPITHELIAL_MESENCHYMAL_TRANSITION	0.250316	0.0260849
ACC	SRSF7	HALLMARK_ESTROGEN_RESPONSE_EARLY	0.248242	0.0273908
ACC	SRSF7	HALLMARK_FATTY_ACID_METABOLISM	-0.446308	3.75e-05
ACC	SRSF7	HALLMARK_G2M_CHECKPOINT	0.574602	3.07e-08
ACC	SRSF7	HALLMARK_HEME_METABOLISM	-0.314302	0.00478871
ACC	SRSF7	HALLMARK_INTERFERON_ALPHA_RESPONSE	-0.263558	0.0189318
ACC	SRSF7	HALLMARK_KRAS_SIGNALING_UP	-0.255187	0.023225
ACC	SRSF7	HALLMARK_MITOTIC_SPINDLE	0.433807	6.5e-05
ACC	SRSF7	HALLMARK_MTORC1_SIGNALING	0.225934	0.0452729
ACC	SRSF7	HALLMARK_MYC_TARGETS_V1	0.579539	2.19e-08
ACC	SRSF7	HALLMARK_MYC_TARGETS_V2	0.461258	1.88e-05
ACC	SRSF7	HALLMARK_MYOGENESIS	0.265787	0.0179104
ACC	SRSF7	HALLMARK_OXIDATIVE_PHOSPHORYLATION	-0.579539	2.19e-08
ACC	SRSF7	HALLMARK_P53_PATHWAY	-0.453317	2.73e-05
ACC	SRSF7	HALLMARK_PI3K_AKT_MTOR_SIGNALING	-0.234739	0.0373115
ACC	SRSF7	HALLMARK_PROTEIN_SECRETION	-0.458378	2.16e-05
ACC	SRSF7	HALLMARK_REACTIVE_OXYGEN_SPECIES_PATHWAY	-0.630054	4.93e-10
ACC	SRSF7	HALLMARK_WNT_BETA_CATENIN_SIGNALING	0.259363	0.0209893
ACC	SRSF8	HALLMARK_ALLOGRAFT_REJECTION	-0.341209	0.00208877
ACC	SRSF8	HALLMARK_ANDROGEN_RESPONSE	0.256197	0.0226665
ACC	SRSF8	HALLMARK_BILE_ACID_METABOLISM	0.311489	0.00520079
ACC	SRSF8	HALLMARK_COMPLEMENT	-0.245347	0.0293046
ACC	SRSF8	HALLMARK_EPITHELIAL_MESENCHYMAL_TRANSITION	-0.243695	0.0304469
ACC	SRSF8	HALLMARK_ESTROGEN_RESPONSE_EARLY	0.425271	9.35e-05
ACC	SRSF8	HALLMARK_ESTROGEN_RESPONSE_LATE	0.288026	0.0100524
ACC	SRSF8	HALLMARK_FATTY_ACID_METABOLISM	0.224691	0.0465026
ACC	SRSF8	HALLMARK_HEME_METABOLISM	0.271003	0.0157037
ACC	SRSF8	HALLMARK_IL2_STAT5_SIGNALING	-0.39341	0.000334828
ACC	SRSF8	HALLMARK_IL6_JAK_STAT3_SIGNALING	-0.347462	0.00170424
ACC	SRSF8	HALLMARK_INTERFERON_ALPHA_RESPONSE	-0.226748	0.0444826
ACC	SRSF8	HALLMARK_INTERFERON_GAMMA_RESPONSE	-0.235646	0.0365621
ACC	SRSF8	HALLMARK_PEROXISOME	0.302541	0.00672826
ACC	SRSF8	HALLMARK_PROTEIN_SECRETION	0.230522	0.0409652
ACC	SRSF8	HALLMARK_SPERMATOGENESIS	0.230365	0.0411064
ACC	SRSF8	HALLMARK_UV_RESPONSE_DN	0.225332	0.0458655
ACC	SRSF8	HALLMARK_XENOBIOTIC_METABOLISM	0.377305	0.000608645
ACC	SRSF9	HALLMARK_ADIPOGENESIS	-0.248411	0.0272823
ACC	SRSF9	HALLMARK_ALLOGRAFT_REJECTION	-0.332178	0.00278226
ACC	SRSF9	HALLMARK_APOPTOSIS	-0.384936	0.000460301
ACC	SRSF9	HALLMARK_COMPLEMENT	-0.353384	0.00140012
ACC	SRSF9	HALLMARK_E2F_TARGETS	0.437654	5.5e-05
ACC	SRSF9	HALLMARK_ESTROGEN_RESPONSE_EARLY	0.353435	0.0013977
ACC	SRSF9	HALLMARK_ESTROGEN_RESPONSE_LATE	0.269691	0.0162357
ACC	SRSF9	HALLMARK_G2M_CHECKPOINT	0.44195	4.55e-05
ACC	SRSF9	HALLMARK_HEDGEHOG_SIGNALING	0.252233	0.0249253
ACC	SRSF9	HALLMARK_INTERFERON_GAMMA_RESPONSE	-0.235822	0.0364181
ACC	SRSF9	HALLMARK_MITOTIC_SPINDLE	0.330254	0.00295431
ACC	SRSF9	HALLMARK_MTORC1_SIGNALING	0.244077	0.0301795
ACC	SRSF9	HALLMARK_MYC_TARGETS_V1	0.297643	0.00772158
ACC	SRSF9	HALLMARK_MYC_TARGETS_V2	0.294158	0.0085045
ACC	SRSF9	HALLMARK_OXIDATIVE_PHOSPHORYLATION	-0.297643	0.00772158
ACC	SRSF9	HALLMARK_P53_PATHWAY	-0.296425	0.00798772
ACC	SRSF9	HALLMARK_PI3K_AKT_MTOR_SIGNALING	-0.266592	0.0175532
ACC	SRSF9	HALLMARK_REACTIVE_OXYGEN_SPECIES_PATHWAY	-0.432639	6.83e-05
BLCA	SRSF1	HALLMARK_FATTY_ACID_METABOLISM	0.101632	0.0394504
BLCA	SRSF1	HALLMARK_HEME_METABOLISM	0.12925	0.00870761
BLCA	SRSF1	HALLMARK_HYPOXIA	-0.104569	0.0340655
BLCA	SRSF1	HALLMARK_PI3K_AKT_MTOR_SIGNALING	0.111386	0.0239271
BLCA	SRSF1	HALLMARK_TNFA_SIGNALING_VIA_NFKB	-0.103982	0.0350892
BLCA	SRSF10	HALLMARK_ADIPOGENESIS	0.103758	0.0354859
BLCA	SRSF10	HALLMARK_ANDROGEN_RESPONSE	0.109043	0.0270703
BLCA	SRSF10	HALLMARK_CHOLESTEROL_HOMEOSTASIS	0.117898	0.016792
BLCA	SRSF10	HALLMARK_FATTY_ACID_METABOLISM	0.135101	0.00608516
BLCA	SRSF10	HALLMARK_HYPOXIA	-0.116956	0.0176923
BLCA	SRSF10	HALLMARK_PI3K_AKT_MTOR_SIGNALING	0.11809	0.0166133
BLCA	SRSF10	HALLMARK_PROTEIN_SECRETION	0.101028	0.0406428
BLCA	SRSF11	HALLMARK_CHOLESTEROL_HOMEOSTASIS	0.110857	0.0246077
BLCA	SRSF11	HALLMARK_FATTY_ACID_METABOLISM	0.097387	0.0484935
BLCA	SRSF11	HALLMARK_G2M_CHECKPOINT	-0.112049	0.0230974
BLCA	SRSF11	HALLMARK_PANCREAS_BETA_CELLS	-0.109996	0.0257512
BLCA	SRSF12	HALLMARK_MTORC1_SIGNALING	0.117674	0.0170028
BLCA	SRSF2	HALLMARK_HYPOXIA	-0.116453	0.0181901
BLCA	SRSF2	HALLMARK_PI3K_AKT_MTOR_SIGNALING	0.107152	0.0298599
BLCA	SRSF3	HALLMARK_BILE_ACID_METABOLISM	-0.100394	0.0419262
BLCA	SRSF3	HALLMARK_HYPOXIA	-0.101779	0.039165
BLCA	SRSF4	HALLMARK_NOTCH_SIGNALING	-0.147546	0.0027128
BLCA	SRSF5	HALLMARK_MTORC1_SIGNALING	0.114614	0.0201168
BLCA	SRSF6	HALLMARK_PROTEIN_SECRETION	0.109222	0.0268176
BLCA	SRSF7	HALLMARK_WNT_BETA_CATENIN_SIGNALING	0.105155	0.0330694
BLCA	SRSF8	HALLMARK_BILE_ACID_METABOLISM	-0.105425	0.0326191
BLCA	SRSF8	HALLMARK_EPITHELIAL_MESENCHYMAL_TRANSITION	0.13385	0.00657719
BLCA	SRSF8	HALLMARK_FATTY_ACID_METABOLISM	-0.137778	0.00514127
BLCA	SRSF8	HALLMARK_HEME_METABOLISM	-0.153687	0.00177921
BLCA	SRSF8	HALLMARK_MITOTIC_SPINDLE	-0.131653	0.00752816
BLCA	SRSF8	HALLMARK_PEROXISOME	-0.116606	0.0180374
BLCA	SRSF8	HALLMARK_PI3K_AKT_MTOR_SIGNALING	-0.152524	0.0019294
BLCA	SRSF8	HALLMARK_TNFA_SIGNALING_VIA_NFKB	0.110384	0.025231
BLCA	SRSF8	HALLMARK_XENOBIOTIC_METABOLISM	-0.0988647	0.0451663
BLCA	SRSF9	HALLMARK_BILE_ACID_METABOLISM	-0.136406	0.00560721
BLCA	SRSF9	HALLMARK_E2F_TARGETS	-0.145473	0.00311709
BLCA	SRSF9	HALLMARK_G2M_CHECKPOINT	-0.142509	0.00379051
BLCA	SRSF9	HALLMARK_MITOTIC_SPINDLE	-0.115484	0.0191841
BLCA	SRSF9	HALLMARK_OXIDATIVE_PHOSPHORYLATION	0.0988347	0.0452318
BRCA	SRSF1	HALLMARK_ADIPOGENESIS	-0.27883	3.66e-21
BRCA	SRSF1	HALLMARK_ANGIOGENESIS	-0.266086	2.39e-19
BRCA	SRSF1	HALLMARK_APICAL_JUNCTION	-0.199238	2.4e-11
BRCA	SRSF1	HALLMARK_APOPTOSIS	-0.263814	4.92e-19
BRCA	SRSF1	HALLMARK_BILE_ACID_METABOLISM	0.0626445	0.0374208
BRCA	SRSF1	HALLMARK_CHOLESTEROL_HOMEOSTASIS	-0.157056	1.56e-07
BRCA	SRSF1	HALLMARK_COAGULATION	-0.171269	1.02e-08
BRCA	SRSF1	HALLMARK_DNA_REPAIR	0.0653597	0.0298907
BRCA	SRSF1	HALLMARK_E2F_TARGETS	0.521952	3.58e-78
BRCA	SRSF1	HALLMARK_EPITHELIAL_MESENCHYMAL_TRANSITION	-0.246641	9.21e-17
BRCA	SRSF1	HALLMARK_FATTY_ACID_METABOLISM	-0.120925	5.62e-05
BRCA	SRSF1	HALLMARK_G2M_CHECKPOINT	0.526378	1.04e-79
BRCA	SRSF1	HALLMARK_HEME_METABOLISM	0.149587	5.95e-07
BRCA	SRSF1	HALLMARK_HYPOXIA	-0.280854	1.85e-21
BRCA	SRSF1	HALLMARK_INFLAMMATORY_RESPONSE	0.0847175	0.00485135
BRCA	SRSF1	HALLMARK_KRAS_SIGNALING_DN	-0.0623668	0.0382747
BRCA	SRSF1	HALLMARK_MITOTIC_SPINDLE	0.456632	5.78e-58
BRCA	SRSF1	HALLMARK_MTORC1_SIGNALING	0.234257	3.15e-15
BRCA	SRSF1	HALLMARK_MYC_TARGETS_V2	0.15711	1.55e-07
BRCA	SRSF1	HALLMARK_MYOGENESIS	-0.188536	2.72e-10
BRCA	SRSF1	HALLMARK_NOTCH_SIGNALING	-0.320665	8.06e-28
BRCA	SRSF1	HALLMARK_P53_PATHWAY	-0.368859	6.53e-37
BRCA	SRSF1	HALLMARK_PEROXISOME	0.101686	0.000715379
BRCA	SRSF1	HALLMARK_PI3K_AKT_MTOR_SIGNALING	0.201815	1.31e-11
BRCA	SRSF1	HALLMARK_PROTEIN_SECRETION	0.0605108	0.0444177
BRCA	SRSF1	HALLMARK_REACTIVE_OXYGEN_SPECIES_PATHWAY	-0.346865	1.45e-32
BRCA	SRSF1	HALLMARK_SPERMATOGENESIS	0.123918	3.65e-05
BRCA	SRSF1	HALLMARK_TGF_BETA_SIGNALING	-0.189949	1.99e-10
BRCA	SRSF1	HALLMARK_TNFA_SIGNALING_VIA_NFKB	-0.16005	8.97e-08
BRCA	SRSF1	HALLMARK_UNFOLDED_PROTEIN_RESPONSE	-0.0796594	0.00809665
BRCA	SRSF1	HALLMARK_UV_RESPONSE_DN	-0.0812947	0.00688093
BRCA	SRSF10	HALLMARK_ADIPOGENESIS	-0.268414	1.13e-19
BRCA	SRSF10	HALLMARK_ANDROGEN_RESPONSE	0.193637	8.69e-11
BRCA	SRSF10	HALLMARK_ANGIOGENESIS	-0.198995	2.54e-11
BRCA	SRSF10	HALLMARK_APICAL_JUNCTION	-0.149085	6.5e-07
BRCA	SRSF10	HALLMARK_APOPTOSIS	-0.175377	4.46e-09
BRCA	SRSF10	HALLMARK_BILE_ACID_METABOLISM	0.0626217	0.0374902
BRCA	SRSF10	HALLMARK_CHOLESTEROL_HOMEOSTASIS	-0.266425	2.14e-19
BRCA	SRSF10	HALLMARK_COAGULATION	-0.279653	2.77e-21
BRCA	SRSF10	HALLMARK_DNA_REPAIR	-0.18748	3.43e-10
BRCA	SRSF10	HALLMARK_E2F_TARGETS	0.329956	1.89e-29
BRCA	SRSF10	HALLMARK_EPITHELIAL_MESENCHYMAL_TRANSITION	-0.159707	9.57e-08
BRCA	SRSF10	HALLMARK_ESTROGEN_RESPONSE_LATE	-0.0902205	0.00269593
BRCA	SRSF10	HALLMARK_FATTY_ACID_METABOLISM	-0.167686	2.08e-08
BRCA	SRSF10	HALLMARK_G2M_CHECKPOINT	0.382972	6.94e-40
BRCA	SRSF10	HALLMARK_GLYCOLYSIS	-0.10996	0.000251664
BRCA	SRSF10	HALLMARK_HEDGEHOG_SIGNALING	0.20748	3.36e-12
BRCA	SRSF10	HALLMARK_HEME_METABOLISM	0.157761	1.37e-07
BRCA	SRSF10	HALLMARK_HYPOXIA	-0.153057	3.22e-07
BRCA	SRSF10	HALLMARK_INFLAMMATORY_RESPONSE	0.124477	3.36e-05
BRCA	SRSF10	HALLMARK_KRAS_SIGNALING_DN	-0.131349	1.2e-05
BRCA	SRSF10	HALLMARK_KRAS_SIGNALING_UP	0.133006	9.25e-06
BRCA	SRSF10	HALLMARK_MITOTIC_SPINDLE	0.536497	2.66e-83
BRCA	SRSF10	HALLMARK_MTORC1_SIGNALING	0.0696387	0.0206655
BRCA	SRSF10	HALLMARK_MYC_TARGETS_V1	-0.147776	8.16e-07
BRCA	SRSF10	HALLMARK_MYC_TARGETS_V2	-0.130665	1.33e-05
BRCA	SRSF10	HALLMARK_MYOGENESIS	-0.233601	3.78e-15
BRCA	SRSF10	HALLMARK_NOTCH_SIGNALING	-0.172652	7.76e-09
BRCA	SRSF10	HALLMARK_OXIDATIVE_PHOSPHORYLATION	-0.220431	1.29e-13
BRCA	SRSF10	HALLMARK_P53_PATHWAY	-0.415617	2.41e-47
BRCA	SRSF10	HALLMARK_PANCREAS_BETA_CELLS	0.0962833	0.00136015
BRCA	SRSF10	HALLMARK_PI3K_AKT_MTOR_SIGNALING	0.283678	7.04e-22
BRCA	SRSF10	HALLMARK_PROTEIN_SECRETION	0.284375	5.54e-22
BRCA	SRSF10	HALLMARK_REACTIVE_OXYGEN_SPECIES_PATHWAY	-0.478466	3.08e-64
BRCA	SRSF10	HALLMARK_SPERMATOGENESIS	0.0852222	0.00460294
BRCA	SRSF10	HALLMARK_TGF_BETA_SIGNALING	0.0836247	0.00543123
BRCA	SRSF10	HALLMARK_TNFA_SIGNALING_VIA_NFKB	-0.0596003	0.047723
BRCA	SRSF10	HALLMARK_UNFOLDED_PROTEIN_RESPONSE	-0.129636	1.56e-05
BRCA	SRSF10	HALLMARK_UV_RESPONSE_DN	0.233805	3.57e-15
BRCA	SRSF10	HALLMARK_UV_RESPONSE_UP	-0.183994	7.31e-10
BRCA	SRSF11	HALLMARK_ANDROGEN_RESPONSE	0.146392	1.03e-06
BRCA	SRSF11	HALLMARK_ANGIOGENESIS	-0.0957445	0.00144769
BRCA	SRSF11	HALLMARK_BILE_ACID_METABOLISM	0.0590326	0.0498866
BRCA	SRSF11	HALLMARK_CHOLESTEROL_HOMEOSTASIS	-0.290822	5.84e-23
BRCA	SRSF11	HALLMARK_COAGULATION	-0.13815	4.08e-06
BRCA	SRSF11	HALLMARK_COMPLEMENT	-0.0663508	0.0274865
BRCA	SRSF11	HALLMARK_DNA_REPAIR	-0.112349	0.00018359
BRCA	SRSF11	HALLMARK_EPITHELIAL_MESENCHYMAL_TRANSITION	-0.0708888	0.0184887
BRCA	SRSF11	HALLMARK_ESTROGEN_RESPONSE_EARLY	0.0777959	0.00971321
BRCA	SRSF11	HALLMARK_FATTY_ACID_METABOLISM	-0.0707845	0.0186624
BRCA	SRSF11	HALLMARK_GLYCOLYSIS	-0.191574	1.38e-10
BRCA	SRSF11	HALLMARK_HEDGEHOG_SIGNALING	0.101824	0.000703419
BRCA	SRSF11	HALLMARK_HEME_METABOLISM	0.116063	0.000111054
BRCA	SRSF11	HALLMARK_KRAS_SIGNALING_UP	0.118214	8.24e-05
BRCA	SRSF11	HALLMARK_MITOTIC_SPINDLE	0.287161	2.11e-22
BRCA	SRSF11	HALLMARK_MTORC1_SIGNALING	-0.230833	8.09e-15
BRCA	SRSF11	HALLMARK_MYC_TARGETS_V1	-0.109547	0.000265622
BRCA	SRSF11	HALLMARK_MYC_TARGETS_V2	-0.22668	2.48e-14
BRCA	SRSF11	HALLMARK_MYOGENESIS	-0.0659783	0.02837
BRCA	SRSF11	HALLMARK_OXIDATIVE_PHOSPHORYLATION	-0.188423	2.79e-10
BRCA	SRSF11	HALLMARK_P53_PATHWAY	-0.102843	0.000620862
BRCA	SRSF11	HALLMARK_PEROXISOME	-0.0668922	0.026245
BRCA	SRSF11	HALLMARK_PI3K_AKT_MTOR_SIGNALING	0.205364	5.6e-12
BRCA	SRSF11	HALLMARK_PROTEIN_SECRETION	0.212474	9.79e-13
BRCA	SRSF11	HALLMARK_REACTIVE_OXYGEN_SPECIES_PATHWAY	-0.298072	4.34e-24
BRCA	SRSF11	HALLMARK_TGF_BETA_SIGNALING	0.248564	5.23e-17
BRCA	SRSF11	HALLMARK_TNFA_SIGNALING_VIA_NFKB	0.0653341	0.0299552
BRCA	SRSF11	HALLMARK_UV_RESPONSE_DN	0.253236	1.29e-17
BRCA	SRSF11	HALLMARK_UV_RESPONSE_UP	-0.180166	1.65e-09
BRCA	SRSF11	HALLMARK_WNT_BETA_CATENIN_SIGNALING	0.107852	0.000330725
BRCA	SRSF11	HALLMARK_XENOBIOTIC_METABOLISM	-0.0818177	0.00652827
BRCA	SRSF12	HALLMARK_ADIPOGENESIS	-0.333109	5.13e-30
BRCA	SRSF12	HALLMARK_ALLOGRAFT_REJECTION	0.153883	2.78e-07
BRCA	SRSF12	HALLMARK_ANDROGEN_RESPONSE	-0.268767	1.01e-19
BRCA	SRSF12	HALLMARK_ANGIOGENESIS	-0.0724302	0.0160826
BRCA	SRSF12	HALLMARK_APOPTOSIS	-0.13722	4.74e-06
BRCA	SRSF12	HALLMARK_BILE_ACID_METABOLISM	-0.188225	2.91e-10
BRCA	SRSF12	HALLMARK_COAGULATION	-0.233569	3.81e-15
BRCA	SRSF12	HALLMARK_COMPLEMENT	0.0765889	0.0109079
BRCA	SRSF12	HALLMARK_DNA_REPAIR	-0.21636	3.68e-13
BRCA	SRSF12	HALLMARK_E2F_TARGETS	0.241187	4.48e-16
BRCA	SRSF12	HALLMARK_ESTROGEN_RESPONSE_EARLY	-0.564808	4.89e-94
BRCA	SRSF12	HALLMARK_ESTROGEN_RESPONSE_LATE	-0.47764	5.42e-64
BRCA	SRSF12	HALLMARK_FATTY_ACID_METABOLISM	-0.262482	7.49e-19
BRCA	SRSF12	HALLMARK_G2M_CHECKPOINT	0.272249	3.26e-20
BRCA	SRSF12	HALLMARK_GLYCOLYSIS	0.219765	1.53e-13
BRCA	SRSF12	HALLMARK_HEDGEHOG_SIGNALING	0.196424	4.6e-11
BRCA	SRSF12	HALLMARK_HEME_METABOLISM	-0.140758	2.67e-06
BRCA	SRSF12	HALLMARK_HYPOXIA	0.362609	1.22e-35
BRCA	SRSF12	HALLMARK_IL2_STAT5_SIGNALING	0.191481	1.41e-10
BRCA	SRSF12	HALLMARK_IL6_JAK_STAT3_SIGNALING	0.279933	2.52e-21
BRCA	SRSF12	HALLMARK_INFLAMMATORY_RESPONSE	0.223222	6.22e-14
BRCA	SRSF12	HALLMARK_INTERFERON_GAMMA_RESPONSE	0.124629	3.29e-05
BRCA	SRSF12	HALLMARK_KRAS_SIGNALING_UP	0.207692	3.19e-12
BRCA	SRSF12	HALLMARK_MITOTIC_SPINDLE	0.325294	1.26e-28
BRCA	SRSF12	HALLMARK_MYC_TARGETS_V1	-0.117597	8.98e-05
BRCA	SRSF12	HALLMARK_MYC_TARGETS_V2	0.112645	0.00017649
BRCA	SRSF12	HALLMARK_MYOGENESIS	-0.0857806	0.00434152
BRCA	SRSF12	HALLMARK_NOTCH_SIGNALING	0.236684	1.6e-15
BRCA	SRSF12	HALLMARK_OXIDATIVE_PHOSPHORYLATION	-0.317635	2.66e-27
BRCA	SRSF12	HALLMARK_P53_PATHWAY	-0.131023	1.26e-05
BRCA	SRSF12	HALLMARK_PANCREAS_BETA_CELLS	-0.0611942	0.0420655
BRCA	SRSF12	HALLMARK_PEROXISOME	-0.298787	3.34e-24
BRCA	SRSF12	HALLMARK_PROTEIN_SECRETION	-0.304447	4.14e-25
BRCA	SRSF12	HALLMARK_REACTIVE_OXYGEN_SPECIES_PATHWAY	-0.0649534	0.0309272
BRCA	SRSF12	HALLMARK_SPERMATOGENESIS	0.0945066	0.00166882
BRCA	SRSF12	HALLMARK_TGF_BETA_SIGNALING	-0.0747215	0.0130137
BRCA	SRSF12	HALLMARK_TNFA_SIGNALING_VIA_NFKB	0.28628	2.87e-22
BRCA	SRSF12	HALLMARK_UNFOLDED_PROTEIN_RESPONSE	-0.23481	2.7e-15
BRCA	SRSF12	HALLMARK_UV_RESPONSE_UP	0.245799	1.18e-16
BRCA	SRSF12	HALLMARK_WNT_BETA_CATENIN_SIGNALING	0.357156	1.48e-34
BRCA	SRSF12	HALLMARK_XENOBIOTIC_METABOLISM	-0.320108	1.01e-27
BRCA	SRSF2	HALLMARK_ADIPOGENESIS	-0.288184	1.48e-22
BRCA	SRSF2	HALLMARK_ALLOGRAFT_REJECTION	0.176872	3.28e-09
BRCA	SRSF2	HALLMARK_ANDROGEN_RESPONSE	-0.335942	1.57e-30
BRCA	SRSF2	HALLMARK_ANGIOGENESIS	-0.277707	5.34e-21
BRCA	SRSF2	HALLMARK_APICAL_JUNCTION	-0.228195	1.65e-14
BRCA	SRSF2	HALLMARK_APOPTOSIS	-0.206385	4.38e-12
BRCA	SRSF2	HALLMARK_COAGULATION	-0.228667	1.46e-14
BRCA	SRSF2	HALLMARK_DNA_REPAIR	0.14903	6.56e-07
BRCA	SRSF2	HALLMARK_E2F_TARGETS	0.477547	5.78e-64
BRCA	SRSF2	HALLMARK_EPITHELIAL_MESENCHYMAL_TRANSITION	-0.287191	2.09e-22
BRCA	SRSF2	HALLMARK_ESTROGEN_RESPONSE_EARLY	-0.210381	1.65e-12
BRCA	SRSF2	HALLMARK_ESTROGEN_RESPONSE_LATE	-0.0856161	0.0044171
BRCA	SRSF2	HALLMARK_FATTY_ACID_METABOLISM	-0.131561	1.16e-05
BRCA	SRSF2	HALLMARK_G2M_CHECKPOINT	0.45241	8.39e-57
BRCA	SRSF2	HALLMARK_GLYCOLYSIS	0.0632345	0.03566
BRCA	SRSF2	HALLMARK_HYPOXIA	-0.0958767	0.00142575
BRCA	SRSF2	HALLMARK_IL2_STAT5_SIGNALING	0.10309	0.000602267
BRCA	SRSF2	HALLMARK_IL6_JAK_STAT3_SIGNALING	0.171086	1.06e-08
BRCA	SRSF2	HALLMARK_INFLAMMATORY_RESPONSE	0.157857	1.35e-07
BRCA	SRSF2	HALLMARK_INTERFERON_ALPHA_RESPONSE	0.109025	0.000284266
BRCA	SRSF2	HALLMARK_INTERFERON_GAMMA_RESPONSE	0.148865	6.75e-07
BRCA	SRSF2	HALLMARK_MITOTIC_SPINDLE	0.262631	7.14e-19
BRCA	SRSF2	HALLMARK_MTORC1_SIGNALING	0.130166	1.43e-05
BRCA	SRSF2	HALLMARK_MYC_TARGETS_V2	0.309973	5.16e-26
BRCA	SRSF2	HALLMARK_MYOGENESIS	-0.101609	0.000722085
BRCA	SRSF2	HALLMARK_NOTCH_SIGNALING	-0.278254	4.44e-21
BRCA	SRSF2	HALLMARK_P53_PATHWAY	-0.154239	2.61e-07
BRCA	SRSF2	HALLMARK_PI3K_AKT_MTOR_SIGNALING	0.0820021	0.00640781
BRCA	SRSF2	HALLMARK_PROTEIN_SECRETION	-0.32897	2.83e-29
BRCA	SRSF2	HALLMARK_REACTIVE_OXYGEN_SPECIES_PATHWAY	-0.161714	6.56e-08
BRCA	SRSF2	HALLMARK_SPERMATOGENESIS	0.0795622	0.00817458
BRCA	SRSF2	HALLMARK_TGF_BETA_SIGNALING	-0.341116	1.75e-31
BRCA	SRSF2	HALLMARK_TNFA_SIGNALING_VIA_NFKB	0.0591109	0.0495836
BRCA	SRSF2	HALLMARK_UV_RESPONSE_DN	-0.33227	7.27e-30
BRCA	SRSF2	HALLMARK_UV_RESPONSE_UP	0.204974	6.16e-12
BRCA	SRSF2	HALLMARK_WNT_BETA_CATENIN_SIGNALING	0.0816556	0.00663576
BRCA	SRSF3	HALLMARK_ADIPOGENESIS	-0.221177	1.06e-13
BRCA	SRSF3	HALLMARK_ALLOGRAFT_REJECTION	0.139124	3.48e-06
BRCA	SRSF3	HALLMARK_ANDROGEN_RESPONSE	-0.288568	1.29e-22
BRCA	SRSF3	HALLMARK_ANGIOGENESIS	-0.288102	1.52e-22
BRCA	SRSF3	HALLMARK_APICAL_JUNCTION	-0.167469	2.17e-08
BRCA	SRSF3	HALLMARK_APOPTOSIS	-0.130271	1.41e-05
BRCA	SRSF3	HALLMARK_BILE_ACID_METABOLISM	-0.0786979	0.00889796
BRCA	SRSF3	HALLMARK_CHOLESTEROL_HOMEOSTASIS	-0.111643	0.00020166
BRCA	SRSF3	HALLMARK_COAGULATION	-0.210612	1.56e-12
BRCA	SRSF3	HALLMARK_DNA_REPAIR	0.156218	1.82e-07
BRCA	SRSF3	HALLMARK_E2F_TARGETS	0.360906	2.67e-35
BRCA	SRSF3	HALLMARK_EPITHELIAL_MESENCHYMAL_TRANSITION	-0.21299	8.61e-13
BRCA	SRSF3	HALLMARK_ESTROGEN_RESPONSE_EARLY	-0.210326	1.67e-12
BRCA	SRSF3	HALLMARK_ESTROGEN_RESPONSE_LATE	-0.0687384	0.0223685
BRCA	SRSF3	HALLMARK_FATTY_ACID_METABOLISM	-0.063534	0.0347934
BRCA	SRSF3	HALLMARK_G2M_CHECKPOINT	0.335478	1.91e-30
BRCA	SRSF3	HALLMARK_HEME_METABOLISM	-0.0629152	0.0366039
BRCA	SRSF3	HALLMARK_IL2_STAT5_SIGNALING	0.0889197	0.00310645
BRCA	SRSF3	HALLMARK_IL6_JAK_STAT3_SIGNALING	0.120431	6.03e-05
BRCA	SRSF3	HALLMARK_INFLAMMATORY_RESPONSE	0.125709	2.8e-05
BRCA	SRSF3	HALLMARK_INTERFERON_GAMMA_RESPONSE	0.082365	0.00617661
BRCA	SRSF3	HALLMARK_MITOTIC_SPINDLE	0.161115	7.35e-08
BRCA	SRSF3	HALLMARK_MYC_TARGETS_V2	0.285516	3.74e-22
BRCA	SRSF3	HALLMARK_NOTCH_SIGNALING	-0.118249	8.2e-05
BRCA	SRSF3	HALLMARK_P53_PATHWAY	-0.0632614	0.0355814
BRCA	SRSF3	HALLMARK_PANCREAS_BETA_CELLS	-0.0665724	0.0269725
BRCA	SRSF3	HALLMARK_PEROXISOME	-0.0887304	0.00317075
BRCA	SRSF3	HALLMARK_PI3K_AKT_MTOR_SIGNALING	0.0600791	0.0459602
BRCA	SRSF3	HALLMARK_PROTEIN_SECRETION	-0.33003	1.83e-29
BRCA	SRSF3	HALLMARK_REACTIVE_OXYGEN_SPECIES_PATHWAY	-0.122808	4.29e-05
BRCA	SRSF3	HALLMARK_SPERMATOGENESIS	0.0798506	0.00794522
BRCA	SRSF3	HALLMARK_TGF_BETA_SIGNALING	-0.234708	2.78e-15
BRCA	SRSF3	HALLMARK_TNFA_SIGNALING_VIA_NFKB	0.127214	2.24e-05
BRCA	SRSF3	HALLMARK_UNFOLDED_PROTEIN_RESPONSE	-0.0716864	0.0172069
BRCA	SRSF3	HALLMARK_UV_RESPONSE_DN	-0.233107	4.33e-15
BRCA	SRSF3	HALLMARK_UV_RESPONSE_UP	0.266764	1.92e-19
BRCA	SRSF3	HALLMARK_WNT_BETA_CATENIN_SIGNALING	0.1795	1.9e-09
BRCA	SRSF3	HALLMARK_XENOBIOTIC_METABOLISM	-0.0650506	0.0306764
BRCA	SRSF4	HALLMARK_ADIPOGENESIS	-0.114247	0.00014226
BRCA	SRSF4	HALLMARK_ALLOGRAFT_REJECTION	0.180751	1.46e-09
BRCA	SRSF4	HALLMARK_ANDROGEN_RESPONSE	-0.348802	6.21e-33
BRCA	SRSF4	HALLMARK_ANGIOGENESIS	-0.134537	7.27e-06
BRCA	SRSF4	HALLMARK_BILE_ACID_METABOLISM	-0.0641933	0.0329493
BRCA	SRSF4	HALLMARK_CHOLESTEROL_HOMEOSTASIS	-0.0658392	0.028706
BRCA	SRSF4	HALLMARK_COAGULATION	-0.146034	1.1e-06
BRCA	SRSF4	HALLMARK_E2F_TARGETS	0.067716	0.024449
BRCA	SRSF4	HALLMARK_EPITHELIAL_MESENCHYMAL_TRANSITION	-0.0789404	0.00868942
BRCA	SRSF4	HALLMARK_ESTROGEN_RESPONSE_EARLY	-0.162382	5.78e-08
BRCA	SRSF4	HALLMARK_ESTROGEN_RESPONSE_LATE	-0.0661734	0.0279042
BRCA	SRSF4	HALLMARK_FATTY_ACID_METABOLISM	-0.108175	0.000317287
BRCA	SRSF4	HALLMARK_HEME_METABOLISM	-0.148241	7.52e-07
BRCA	SRSF4	HALLMARK_HYPOXIA	0.165728	3.05e-08
BRCA	SRSF4	HALLMARK_IL2_STAT5_SIGNALING	0.135821	5.93e-06
BRCA	SRSF4	HALLMARK_IL6_JAK_STAT3_SIGNALING	0.240931	4.82e-16
BRCA	SRSF4	HALLMARK_INFLAMMATORY_RESPONSE	0.0689997	0.0218621
BRCA	SRSF4	HALLMARK_INTERFERON_GAMMA_RESPONSE	0.102209	0.000671164
BRCA	SRSF4	HALLMARK_MITOTIC_SPINDLE	0.0636333	0.0345104
BRCA	SRSF4	HALLMARK_MTORC1_SIGNALING	-0.156918	1.6e-07
BRCA	SRSF4	HALLMARK_MYC_TARGETS_V2	0.100265	0.00084963
BRCA	SRSF4	HALLMARK_MYOGENESIS	0.0805209	0.00743413
BRCA	SRSF4	HALLMARK_OXIDATIVE_PHOSPHORYLATION	-0.0634033	0.0351694
BRCA	SRSF4	HALLMARK_P53_PATHWAY	0.141275	2.45e-06
BRCA	SRSF4	HALLMARK_PEROXISOME	-0.211264	1.32e-12
BRCA	SRSF4	HALLMARK_PROTEIN_SECRETION	-0.317746	2.55e-27
BRCA	SRSF4	HALLMARK_TNFA_SIGNALING_VIA_NFKB	0.239454	7.33e-16
BRCA	SRSF4	HALLMARK_UV_RESPONSE_DN	-0.150811	4.8e-07
BRCA	SRSF4	HALLMARK_UV_RESPONSE_UP	0.19648	4.54e-11
BRCA	SRSF4	HALLMARK_WNT_BETA_CATENIN_SIGNALING	0.222447	7.63e-14
BRCA	SRSF4	HALLMARK_XENOBIOTIC_METABOLISM	-0.125523	2.88e-05
BRCA	SRSF5	HALLMARK_ADIPOGENESIS	0.303788	5.3e-25
BRCA	SRSF5	HALLMARK_ANDROGEN_RESPONSE	0.13478	7e-06
BRCA	SRSF5	HALLMARK_APOPTOSIS	0.263759	5e-19
BRCA	SRSF5	HALLMARK_BILE_ACID_METABOLISM	0.122835	4.27e-05
BRCA	SRSF5	HALLMARK_CHOLESTEROL_HOMEOSTASIS	-0.18156	1.23e-09
BRCA	SRSF5	HALLMARK_COMPLEMENT	-0.163433	4.74e-08
BRCA	SRSF5	HALLMARK_DNA_REPAIR	0.108701	0.000296435
BRCA	SRSF5	HALLMARK_E2F_TARGETS	-0.410974	3.12e-46
BRCA	SRSF5	HALLMARK_ESTROGEN_RESPONSE_EARLY	0.388924	3.49e-41
BRCA	SRSF5	HALLMARK_ESTROGEN_RESPONSE_LATE	0.340121	2.68e-31
BRCA	SRSF5	HALLMARK_FATTY_ACID_METABOLISM	0.308219	1e-25
BRCA	SRSF5	HALLMARK_G2M_CHECKPOINT	-0.439727	2.07e-53
BRCA	SRSF5	HALLMARK_GLYCOLYSIS	-0.364997	4.01e-36
BRCA	SRSF5	HALLMARK_HEDGEHOG_SIGNALING	-0.114887	0.000130423
BRCA	SRSF5	HALLMARK_INFLAMMATORY_RESPONSE	-0.160202	8.72e-08
BRCA	SRSF5	HALLMARK_KRAS_SIGNALING_DN	0.080513	0.00744002
BRCA	SRSF5	HALLMARK_MITOTIC_SPINDLE	-0.29355	2.22e-23
BRCA	SRSF5	HALLMARK_MTORC1_SIGNALING	-0.455948	8.95e-58
BRCA	SRSF5	HALLMARK_MYC_TARGETS_V2	-0.202646	1.07e-11
BRCA	SRSF5	HALLMARK_MYOGENESIS	0.162043	6.17e-08
BRCA	SRSF5	HALLMARK_OXIDATIVE_PHOSPHORYLATION	0.128998	1.71e-05
BRCA	SRSF5	HALLMARK_P53_PATHWAY	0.322074	4.6e-28
BRCA	SRSF5	HALLMARK_PEROXISOME	0.0633619	0.0352892
BRCA	SRSF5	HALLMARK_PROTEIN_SECRETION	0.0653588	0.029893
BRCA	SRSF5	HALLMARK_REACTIVE_OXYGEN_SPECIES_PATHWAY	0.0678181	0.0242339
BRCA	SRSF5	HALLMARK_SPERMATOGENESIS	-0.0881271	0.00338371
BRCA	SRSF5	HALLMARK_TGF_BETA_SIGNALING	0.213394	7.78e-13
BRCA	SRSF5	HALLMARK_TNFA_SIGNALING_VIA_NFKB	0.0767832	0.0107071
BRCA	SRSF5	HALLMARK_UNFOLDED_PROTEIN_RESPONSE	0.178979	2.12e-09
BRCA	SRSF5	HALLMARK_UV_RESPONSE_DN	0.121322	5.31e-05
BRCA	SRSF5	HALLMARK_UV_RESPONSE_UP	-0.0968942	0.00126681
BRCA	SRSF5	HALLMARK_XENOBIOTIC_METABOLISM	0.153595	2.93e-07
BRCA	SRSF6	HALLMARK_ADIPOGENESIS	0.119628	6.76e-05
BRCA	SRSF6	HALLMARK_ALLOGRAFT_REJECTION	-0.195873	5.22e-11
BRCA	SRSF6	HALLMARK_ANDROGEN_RESPONSE	0.213242	8.08e-13
BRCA	SRSF6	HALLMARK_APICAL_SURFACE	0.0815559	0.00670269
BRCA	SRSF6	HALLMARK_BILE_ACID_METABOLISM	0.205929	4.89e-12
BRCA	SRSF6	HALLMARK_CHOLESTEROL_HOMEOSTASIS	-0.205204	5.82e-12
BRCA	SRSF6	HALLMARK_COMPLEMENT	-0.202214	1.19e-11
BRCA	SRSF6	HALLMARK_DNA_REPAIR	0.150505	5.07e-07
BRCA	SRSF6	HALLMARK_EPITHELIAL_MESENCHYMAL_TRANSITION	-0.150547	5.03e-07
BRCA	SRSF6	HALLMARK_ESTROGEN_RESPONSE_EARLY	0.425647	8.28e-50
BRCA	SRSF6	HALLMARK_ESTROGEN_RESPONSE_LATE	0.362222	1.45e-35
BRCA	SRSF6	HALLMARK_FATTY_ACID_METABOLISM	0.163717	4.49e-08
BRCA	SRSF6	HALLMARK_GLYCOLYSIS	-0.196833	4.19e-11
BRCA	SRSF6	HALLMARK_HEME_METABOLISM	0.257581	3.44e-18
BRCA	SRSF6	HALLMARK_HYPOXIA	-0.231586	6.58e-15
BRCA	SRSF6	HALLMARK_IL2_STAT5_SIGNALING	-0.166356	2.7e-08
BRCA	SRSF6	HALLMARK_IL6_JAK_STAT3_SIGNALING	-0.243313	2.43e-16
BRCA	SRSF6	HALLMARK_INFLAMMATORY_RESPONSE	-0.222346	7.83e-14
BRCA	SRSF6	HALLMARK_INTERFERON_ALPHA_RESPONSE	-0.0803195	0.00758453
BRCA	SRSF6	HALLMARK_INTERFERON_GAMMA_RESPONSE	-0.16498	3.52e-08
BRCA	SRSF6	HALLMARK_KRAS_SIGNALING_UP	-0.10661	0.000387583
BRCA	SRSF6	HALLMARK_MITOTIC_SPINDLE	0.0772416	0.0102465
BRCA	SRSF6	HALLMARK_MTORC1_SIGNALING	-0.211708	1.19e-12
BRCA	SRSF6	HALLMARK_MYC_TARGETS_V2	-0.093677	0.00183392
BRCA	SRSF6	HALLMARK_NOTCH_SIGNALING	-0.197138	3.9e-11
BRCA	SRSF6	HALLMARK_PANCREAS_BETA_CELLS	0.0836477	0.00541842
BRCA	SRSF6	HALLMARK_PEROXISOME	0.229963	1.03e-14
BRCA	SRSF6	HALLMARK_PI3K_AKT_MTOR_SIGNALING	0.188645	2.65e-10
BRCA	SRSF6	HALLMARK_PROTEIN_SECRETION	0.253198	1.31e-17
BRCA	SRSF6	HALLMARK_REACTIVE_OXYGEN_SPECIES_PATHWAY	-0.192433	1.14e-10
BRCA	SRSF6	HALLMARK_TGF_BETA_SIGNALING	0.14461	1.4e-06
BRCA	SRSF6	HALLMARK_TNFA_SIGNALING_VIA_NFKB	-0.225066	3.82e-14
BRCA	SRSF6	HALLMARK_UNFOLDED_PROTEIN_RESPONSE	0.158696	1.15e-07
BRCA	SRSF6	HALLMARK_UV_RESPONSE_DN	0.135432	6.31e-06
BRCA	SRSF6	HALLMARK_UV_RESPONSE_UP	-0.158937	1.1e-07
BRCA	SRSF6	HALLMARK_XENOBIOTIC_METABOLISM	0.22175	9.15e-14
BRCA	SRSF7	HALLMARK_ADIPOGENESIS	-0.188399	2.8e-10
BRCA	SRSF7	HALLMARK_ALLOGRAFT_REJECTION	0.203418	8.94e-12
BRCA	SRSF7	HALLMARK_ANDROGEN_RESPONSE	-0.312876	1.7e-26
BRCA	SRSF7	HALLMARK_ANGIOGENESIS	-0.30981	5.49e-26
BRCA	SRSF7	HALLMARK_APICAL_JUNCTION	-0.19944	2.29e-11
BRCA	SRSF7	HALLMARK_APICAL_SURFACE	-0.0663697	0.0274424
BRCA	SRSF7	HALLMARK_APOPTOSIS	-0.0890123	0.00307547
BRCA	SRSF7	HALLMARK_CHOLESTEROL_HOMEOSTASIS	-0.156265	1.81e-07
BRCA	SRSF7	HALLMARK_COAGULATION	-0.235777	2.07e-15
BRCA	SRSF7	HALLMARK_DNA_REPAIR	0.135903	5.86e-06
BRCA	SRSF7	HALLMARK_E2F_TARGETS	0.340887	1.93e-31
BRCA	SRSF7	HALLMARK_EPITHELIAL_MESENCHYMAL_TRANSITION	-0.226852	2.37e-14
BRCA	SRSF7	HALLMARK_ESTROGEN_RESPONSE_EARLY	-0.181084	1.36e-09
BRCA	SRSF7	HALLMARK_ESTROGEN_RESPONSE_LATE	-0.0642942	0.0326744
BRCA	SRSF7	HALLMARK_FATTY_ACID_METABOLISM	-0.0708436	0.0185638
BRCA	SRSF7	HALLMARK_G2M_CHECKPOINT	0.321983	4.77e-28
BRCA	SRSF7	HALLMARK_HEME_METABOLISM	-0.0963276	0.00135317
BRCA	SRSF7	HALLMARK_IL2_STAT5_SIGNALING	0.131434	1.18e-05
BRCA	SRSF7	HALLMARK_IL6_JAK_STAT3_SIGNALING	0.185247	5.58e-10
BRCA	SRSF7	HALLMARK_INFLAMMATORY_RESPONSE	0.166615	2.57e-08
BRCA	SRSF7	HALLMARK_INTERFERON_ALPHA_RESPONSE	0.0850778	0.00467279
BRCA	SRSF7	HALLMARK_INTERFERON_GAMMA_RESPONSE	0.139336	3.37e-06
BRCA	SRSF7	HALLMARK_KRAS_SIGNALING_DN	0.0665548	0.0270131
BRCA	SRSF7	HALLMARK_MITOTIC_SPINDLE	0.185048	5.82e-10
BRCA	SRSF7	HALLMARK_MYC_TARGETS_V2	0.273999	1.83e-20
BRCA	SRSF7	HALLMARK_MYOGENESIS	-0.0670541	0.0258834
BRCA	SRSF7	HALLMARK_NOTCH_SIGNALING	-0.1935	8.97e-11
BRCA	SRSF7	HALLMARK_P53_PATHWAY	-0.0776882	0.00981479
BRCA	SRSF7	HALLMARK_PEROXISOME	-0.0629562	0.0364814
BRCA	SRSF7	HALLMARK_PI3K_AKT_MTOR_SIGNALING	0.0891033	0.00304525
BRCA	SRSF7	HALLMARK_PROTEIN_SECRETION	-0.348006	8.8e-33
BRCA	SRSF7	HALLMARK_REACTIVE_OXYGEN_SPECIES_PATHWAY	-0.114218	0.000142826
BRCA	SRSF7	HALLMARK_TGF_BETA_SIGNALING	-0.28545	3.82e-22
BRCA	SRSF7	HALLMARK_TNFA_SIGNALING_VIA_NFKB	0.138328	3.97e-06
BRCA	SRSF7	HALLMARK_UV_RESPONSE_DN	-0.277317	6.08e-21
BRCA	SRSF7	HALLMARK_UV_RESPONSE_UP	0.222105	8.34e-14
BRCA	SRSF7	HALLMARK_WNT_BETA_CATENIN_SIGNALING	0.136287	5.51e-06
BRCA	SRSF8	HALLMARK_ADIPOGENESIS	0.141456	2.38e-06
BRCA	SRSF8	HALLMARK_ALLOGRAFT_REJECTION	0.0656403	0.0291923
BRCA	SRSF8	HALLMARK_ANDROGEN_RESPONSE	0.176044	3.89e-09
BRCA	SRSF8	HALLMARK_ANGIOGENESIS	-0.0942179	0.00172466
BRCA	SRSF8	HALLMARK_APOPTOSIS	0.167613	2.11e-08
BRCA	SRSF8	HALLMARK_BILE_ACID_METABOLISM	-0.0628099	0.0369197
BRCA	SRSF8	HALLMARK_CHOLESTEROL_HOMEOSTASIS	-0.0752496	0.0123845
BRCA	SRSF8	HALLMARK_DNA_REPAIR	-0.128777	1.77e-05
BRCA	SRSF8	HALLMARK_E2F_TARGETS	-0.252572	1.58e-17
BRCA	SRSF8	HALLMARK_EPITHELIAL_MESENCHYMAL_TRANSITION	0.0951766	0.00154554
BRCA	SRSF8	HALLMARK_FATTY_ACID_METABOLISM	0.0770985	0.0103884
BRCA	SRSF8	HALLMARK_G2M_CHECKPOINT	-0.233774	3.6e-15
BRCA	SRSF8	HALLMARK_GLYCOLYSIS	-0.0760647	0.0114661
BRCA	SRSF8	HALLMARK_HEME_METABOLISM	-0.0686474	0.0225474
BRCA	SRSF8	HALLMARK_HYPOXIA	0.134844	6.93e-06
BRCA	SRSF8	HALLMARK_IL2_STAT5_SIGNALING	0.089845	0.00280905
BRCA	SRSF8	HALLMARK_INTERFERON_ALPHA_RESPONSE	-0.0710823	0.0181704
BRCA	SRSF8	HALLMARK_KRAS_SIGNALING_DN	0.0829565	0.00581589
BRCA	SRSF8	HALLMARK_KRAS_SIGNALING_UP	0.19815	3.09e-11
BRCA	SRSF8	HALLMARK_MITOTIC_SPINDLE	-0.155878	1.94e-07
BRCA	SRSF8	HALLMARK_MTORC1_SIGNALING	-0.0609057	0.0430455
BRCA	SRSF8	HALLMARK_MYC_TARGETS_V1	0.0770626	0.0104242
BRCA	SRSF8	HALLMARK_MYC_TARGETS_V2	-0.118764	7.63e-05
BRCA	SRSF8	HALLMARK_MYOGENESIS	-0.0637527	0.0341721
BRCA	SRSF8	HALLMARK_NOTCH_SIGNALING	0.200099	1.96e-11
BRCA	SRSF8	HALLMARK_OXIDATIVE_PHOSPHORYLATION	0.073641	0.0143898
BRCA	SRSF8	HALLMARK_P53_PATHWAY	0.154208	2.62e-07
BRCA	SRSF8	HALLMARK_PANCREAS_BETA_CELLS	-0.0827322	0.00595037
BRCA	SRSF8	HALLMARK_PEROXISOME	-0.101135	0.000764914
BRCA	SRSF8	HALLMARK_PROTEIN_SECRETION	0.103748	0.000555243
BRCA	SRSF8	HALLMARK_REACTIVE_OXYGEN_SPECIES_PATHWAY	0.141495	2.36e-06
BRCA	SRSF8	HALLMARK_TGF_BETA_SIGNALING	0.166122	2.82e-08
BRCA	SRSF8	HALLMARK_TNFA_SIGNALING_VIA_NFKB	0.16987	1.35e-08
BRCA	SRSF8	HALLMARK_UV_RESPONSE_DN	0.155889	1.93e-07
BRCA	SRSF8	HALLMARK_WNT_BETA_CATENIN_SIGNALING	0.0781414	0.00939333
BRCA	SRSF8	HALLMARK_XENOBIOTIC_METABOLISM	-0.0868746	0.00386801
BRCA	SRSF9	HALLMARK_ANDROGEN_RESPONSE	-0.251576	2.13e-17
BRCA	SRSF9	HALLMARK_ANGIOGENESIS	-0.188805	2.56e-10
BRCA	SRSF9	HALLMARK_APOPTOSIS	-0.213043	8.5e-13
BRCA	SRSF9	HALLMARK_BILE_ACID_METABOLISM	0.180812	1.44e-09
BRCA	SRSF9	HALLMARK_CHOLESTEROL_HOMEOSTASIS	0.134617	7.18e-06
BRCA	SRSF9	HALLMARK_COMPLEMENT	-0.105343	0.00045497
BRCA	SRSF9	HALLMARK_DNA_REPAIR	0.417095	1.06e-47
BRCA	SRSF9	HALLMARK_E2F_TARGETS	0.277717	5.32e-21
BRCA	SRSF9	HALLMARK_EPITHELIAL_MESENCHYMAL_TRANSITION	-0.304536	4.01e-25
BRCA	SRSF9	HALLMARK_ESTROGEN_RESPONSE_LATE	0.156595	1.7e-07
BRCA	SRSF9	HALLMARK_FATTY_ACID_METABOLISM	0.0988081	0.00101127
BRCA	SRSF9	HALLMARK_G2M_CHECKPOINT	0.209838	1.88e-12
BRCA	SRSF9	HALLMARK_GLYCOLYSIS	0.149208	6.36e-07
BRCA	SRSF9	HALLMARK_HEDGEHOG_SIGNALING	-0.0977157	0.00115059
BRCA	SRSF9	HALLMARK_HEME_METABOLISM	0.138953	3.58e-06
BRCA	SRSF9	HALLMARK_HYPOXIA	-0.230082	9.92e-15
BRCA	SRSF9	HALLMARK_IL2_STAT5_SIGNALING	-0.138336	3.96e-06
BRCA	SRSF9	HALLMARK_IL6_JAK_STAT3_SIGNALING	-0.0760927	0.0114356
BRCA	SRSF9	HALLMARK_INFLAMMATORY_RESPONSE	-0.119204	7.17e-05
BRCA	SRSF9	HALLMARK_KRAS_SIGNALING_UP	-0.335255	2.1e-30
BRCA	SRSF9	HALLMARK_MTORC1_SIGNALING	0.188586	2.69e-10
BRCA	SRSF9	HALLMARK_MYC_TARGETS_V1	0.133064	9.17e-06
BRCA	SRSF9	HALLMARK_MYC_TARGETS_V2	0.434407	4.98e-52
BRCA	SRSF9	HALLMARK_NOTCH_SIGNALING	-0.31746	2.85e-27
BRCA	SRSF9	HALLMARK_OXIDATIVE_PHOSPHORYLATION	0.262228	8.11e-19
BRCA	SRSF9	HALLMARK_PEROXISOME	0.243573	2.25e-16
BRCA	SRSF9	HALLMARK_PROTEIN_SECRETION	-0.224776	4.13e-14
BRCA	SRSF9	HALLMARK_REACTIVE_OXYGEN_SPECIES_PATHWAY	0.132046	1.07e-05
BRCA	SRSF9	HALLMARK_TGF_BETA_SIGNALING	-0.374747	3.91e-38
BRCA	SRSF9	HALLMARK_TNFA_SIGNALING_VIA_NFKB	-0.246075	1.09e-16
BRCA	SRSF9	HALLMARK_UNFOLDED_PROTEIN_RESPONSE	0.173384	6.7e-09
BRCA	SRSF9	HALLMARK_UV_RESPONSE_DN	-0.461024	3.44e-59
BRCA	SRSF9	HALLMARK_UV_RESPONSE_UP	0.244203	1.88e-16
BRCA	SRSF9	HALLMARK_XENOBIOTIC_METABOLISM	0.250383	3.05e-17
CESC	SRSF1	HALLMARK_ALLOGRAFT_REJECTION	-0.185731	0.00109805
CESC	SRSF1	HALLMARK_ANDROGEN_RESPONSE	0.348959	3.44e-10
CESC	SRSF1	HALLMARK_APOPTOSIS	-0.331679	2.72e-09
CESC	SRSF1	HALLMARK_BILE_ACID_METABOLISM	0.183121	0.00129336
CESC	SRSF1	HALLMARK_COAGULATION	-0.174577	0.00217729
CESC	SRSF1	HALLMARK_COMPLEMENT	-0.179714	0.00159631
CESC	SRSF1	HALLMARK_E2F_TARGETS	0.431373	2.68e-15
CESC	SRSF1	HALLMARK_EPITHELIAL_MESENCHYMAL_TRANSITION	-0.132787	0.0201463
CESC	SRSF1	HALLMARK_FATTY_ACID_METABOLISM	0.226405	6.43e-05
CESC	SRSF1	HALLMARK_G2M_CHECKPOINT	0.443083	3.81e-16
CESC	SRSF1	HALLMARK_GLYCOLYSIS	0.19283	0.000695827
CESC	SRSF1	HALLMARK_HEDGEHOG_SIGNALING	0.179256	0.00164162
CESC	SRSF1	HALLMARK_HEME_METABOLISM	0.276585	8.89e-07
CESC	SRSF1	HALLMARK_HYPOXIA	-0.168975	0.00302575
CESC	SRSF1	HALLMARK_IL2_STAT5_SIGNALING	-0.170798	0.00272143
CESC	SRSF1	HALLMARK_IL6_JAK_STAT3_SIGNALING	-0.213894	0.000163235
CESC	SRSF1	HALLMARK_INFLAMMATORY_RESPONSE	-0.232586	3.98e-05
CESC	SRSF1	HALLMARK_INTERFERON_ALPHA_RESPONSE	-0.232438	4.03e-05
CESC	SRSF1	HALLMARK_INTERFERON_GAMMA_RESPONSE	-0.221313	9.46e-05
CESC	SRSF1	HALLMARK_MITOTIC_SPINDLE	0.503745	4.28e-21
CESC	SRSF1	HALLMARK_P53_PATHWAY	-0.36282	5.94e-11
CESC	SRSF1	HALLMARK_PEROXISOME	0.236293	2.97e-05
CESC	SRSF1	HALLMARK_PI3K_AKT_MTOR_SIGNALING	0.225211	7.05e-05
CESC	SRSF1	HALLMARK_PROTEIN_SECRETION	0.264137	2.8e-06
CESC	SRSF1	HALLMARK_TNFA_SIGNALING_VIA_NFKB	-0.336248	1.59e-09
CESC	SRSF1	HALLMARK_UV_RESPONSE_DN	0.265981	2.37e-06
CESC	SRSF1	HALLMARK_WNT_BETA_CATENIN_SIGNALING	0.242601	1.78e-05
CESC	SRSF1	HALLMARK_XENOBIOTIC_METABOLISM	0.230829	4.57e-05
CESC	SRSF10	HALLMARK_ALLOGRAFT_REJECTION	-0.188102	0.000944584
CESC	SRSF10	HALLMARK_ANDROGEN_RESPONSE	0.344802	5.72e-10
CESC	SRSF10	HALLMARK_APOPTOSIS	-0.279819	6.54e-07
CESC	SRSF10	HALLMARK_BILE_ACID_METABOLISM	0.131456	0.0214413
CESC	SRSF10	HALLMARK_COAGULATION	-0.20279	0.000356947
CESC	SRSF10	HALLMARK_COMPLEMENT	-0.241841	1.9e-05
CESC	SRSF10	HALLMARK_E2F_TARGETS	0.511308	8.76e-22
CESC	SRSF10	HALLMARK_ESTROGEN_RESPONSE_EARLY	0.131762	0.0211376
CESC	SRSF10	HALLMARK_FATTY_ACID_METABOLISM	0.173946	0.00226056
CESC	SRSF10	HALLMARK_G2M_CHECKPOINT	0.508178	1.7e-21
CESC	SRSF10	HALLMARK_HEDGEHOG_SIGNALING	0.133805	0.0192019
CESC	SRSF10	HALLMARK_HEME_METABOLISM	0.19823	0.000486464
CESC	SRSF10	HALLMARK_HYPOXIA	-0.217136	0.000128892
CESC	SRSF10	HALLMARK_IL2_STAT5_SIGNALING	-0.165025	0.00379372
CESC	SRSF10	HALLMARK_IL6_JAK_STAT3_SIGNALING	-0.223531	8.01e-05
CESC	SRSF10	HALLMARK_INFLAMMATORY_RESPONSE	-0.226832	6.23e-05
CESC	SRSF10	HALLMARK_INTERFERON_ALPHA_RESPONSE	-0.124825	0.0290248
CESC	SRSF10	HALLMARK_INTERFERON_GAMMA_RESPONSE	-0.177734	0.00180087
CESC	SRSF10	HALLMARK_MITOTIC_SPINDLE	0.55602	3.14e-26
CESC	SRSF10	HALLMARK_MYC_TARGETS_V2	-0.232939	3.87e-05
CESC	SRSF10	HALLMARK_OXIDATIVE_PHOSPHORYLATION	-0.148217	0.00941849
CESC	SRSF10	HALLMARK_P53_PATHWAY	-0.280073	6.38e-07
CESC	SRSF10	HALLMARK_PEROXISOME	0.174677	0.00216431
CESC	SRSF10	HALLMARK_PI3K_AKT_MTOR_SIGNALING	0.24557	1.39e-05
CESC	SRSF10	HALLMARK_PROTEIN_SECRETION	0.332207	2.56e-09
CESC	SRSF10	HALLMARK_REACTIVE_OXYGEN_SPECIES_PATHWAY	-0.191815	0.00074344
CESC	SRSF10	HALLMARK_TGF_BETA_SIGNALING	0.162492	0.00437506
CESC	SRSF10	HALLMARK_TNFA_SIGNALING_VIA_NFKB	-0.311205	2.69e-08
CESC	SRSF10	HALLMARK_UV_RESPONSE_DN	0.357742	1.14e-10
CESC	SRSF10	HALLMARK_UV_RESPONSE_UP	-0.185298	0.00112845
CESC	SRSF10	HALLMARK_WNT_BETA_CATENIN_SIGNALING	0.178002	0.00177185
CESC	SRSF10	HALLMARK_XENOBIOTIC_METABOLISM	0.143701	0.0118515
CESC	SRSF11	HALLMARK_ALLOGRAFT_REJECTION	-0.223645	7.94e-05
CESC	SRSF11	HALLMARK_ANDROGEN_RESPONSE	0.335355	1.77e-09
CESC	SRSF11	HALLMARK_APOPTOSIS	-0.245015	1.46e-05
CESC	SRSF11	HALLMARK_CHOLESTEROL_HOMEOSTASIS	-0.148414	0.00932301
CESC	SRSF11	HALLMARK_COAGULATION	-0.207401	0.00025921
CESC	SRSF11	HALLMARK_COMPLEMENT	-0.257521	5.03e-06
CESC	SRSF11	HALLMARK_E2F_TARGETS	0.386461	2.44e-12
CESC	SRSF11	HALLMARK_ESTROGEN_RESPONSE_EARLY	0.160384	0.00491869
CESC	SRSF11	HALLMARK_FATTY_ACID_METABOLISM	0.132152	0.0207553
CESC	SRSF11	HALLMARK_G2M_CHECKPOINT	0.410555	7.16e-14
CESC	SRSF11	HALLMARK_HEDGEHOG_SIGNALING	0.153644	0.00708818
CESC	SRSF11	HALLMARK_HEME_METABOLISM	0.183208	0.00128634
CESC	SRSF11	HALLMARK_HYPOXIA	-0.174239	0.00222159
CESC	SRSF11	HALLMARK_IL2_STAT5_SIGNALING	-0.226398	6.44e-05
CESC	SRSF11	HALLMARK_IL6_JAK_STAT3_SIGNALING	-0.224196	7.61e-05
CESC	SRSF11	HALLMARK_INFLAMMATORY_RESPONSE	-0.207815	0.000251778
CESC	SRSF11	HALLMARK_INTERFERON_ALPHA_RESPONSE	-0.173791	0.00228147
CESC	SRSF11	HALLMARK_INTERFERON_GAMMA_RESPONSE	-0.208729	0.000236086
CESC	SRSF11	HALLMARK_MITOTIC_SPINDLE	0.552531	7.39e-26
CESC	SRSF11	HALLMARK_MYC_TARGETS_V2	-0.238599	2.47e-05
CESC	SRSF11	HALLMARK_NOTCH_SIGNALING	0.124412	0.0295645
CESC	SRSF11	HALLMARK_P53_PATHWAY	-0.176439	0.00194746
CESC	SRSF11	HALLMARK_PEROXISOME	0.152683	0.00745856
CESC	SRSF11	HALLMARK_PI3K_AKT_MTOR_SIGNALING	0.20951	0.000223401
CESC	SRSF11	HALLMARK_PROTEIN_SECRETION	0.363105	5.73e-11
CESC	SRSF11	HALLMARK_REACTIVE_OXYGEN_SPECIES_PATHWAY	-0.15885	0.00535163
CESC	SRSF11	HALLMARK_TGF_BETA_SIGNALING	0.264559	2.69e-06
CESC	SRSF11	HALLMARK_TNFA_SIGNALING_VIA_NFKB	-0.25372	6.99e-06
CESC	SRSF11	HALLMARK_UV_RESPONSE_DN	0.369764	2.39e-11
CESC	SRSF11	HALLMARK_UV_RESPONSE_UP	-0.212109	0.000185613
CESC	SRSF11	HALLMARK_WNT_BETA_CATENIN_SIGNALING	0.178273	0.001743
CESC	SRSF12	HALLMARK_ALLOGRAFT_REJECTION	-0.213586	0.00016691
CESC	SRSF12	HALLMARK_ANGIOGENESIS	0.194859	0.000608949
CESC	SRSF12	HALLMARK_APICAL_JUNCTION	0.190077	0.000832056
CESC	SRSF12	HALLMARK_APOPTOSIS	-0.209075	0.000230385
CESC	SRSF12	HALLMARK_CHOLESTEROL_HOMEOSTASIS	0.190759	0.000796184
CESC	SRSF12	HALLMARK_COMPLEMENT	-0.244288	1.55e-05
CESC	SRSF12	HALLMARK_EPITHELIAL_MESENCHYMAL_TRANSITION	0.188764	0.000905368
CESC	SRSF12	HALLMARK_ESTROGEN_RESPONSE_EARLY	-0.190389	0.000815452
CESC	SRSF12	HALLMARK_ESTROGEN_RESPONSE_LATE	-0.211532	0.000193446
CESC	SRSF12	HALLMARK_GLYCOLYSIS	0.169342	0.00296219
CESC	SRSF12	HALLMARK_HEDGEHOG_SIGNALING	0.543989	5.75e-25
CESC	SRSF12	HALLMARK_HYPOXIA	0.229788	4.96e-05
CESC	SRSF12	HALLMARK_IL2_STAT5_SIGNALING	-0.123071	0.0313784
CESC	SRSF12	HALLMARK_IL6_JAK_STAT3_SIGNALING	-0.229296	5.15e-05
CESC	SRSF12	HALLMARK_INFLAMMATORY_RESPONSE	-0.304809	5.32e-08
CESC	SRSF12	HALLMARK_INTERFERON_ALPHA_RESPONSE	-0.383957	3.46e-12
CESC	SRSF12	HALLMARK_INTERFERON_GAMMA_RESPONSE	-0.318216	1.25e-08
CESC	SRSF12	HALLMARK_KRAS_SIGNALING_DN	-0.169872	0.00287237
CESC	SRSF12	HALLMARK_MITOTIC_SPINDLE	0.128022	0.0251221
CESC	SRSF12	HALLMARK_MYOGENESIS	0.28822	2.89e-07
CESC	SRSF12	HALLMARK_NOTCH_SIGNALING	0.187535	0.000979375
CESC	SRSF12	HALLMARK_P53_PATHWAY	-0.291178	2.15e-07
CESC	SRSF12	HALLMARK_PANCREAS_BETA_CELLS	0.14753	0.00975724
CESC	SRSF12	HALLMARK_PEROXISOME	0.198617	0.000473991
CESC	SRSF12	HALLMARK_PROTEIN_SECRETION	0.137649	0.0159744
CESC	SRSF12	HALLMARK_TGF_BETA_SIGNALING	0.203499	0.000339959
CESC	SRSF12	HALLMARK_TNFA_SIGNALING_VIA_NFKB	-0.25178	8.26e-06
CESC	SRSF12	HALLMARK_UV_RESPONSE_DN	0.249927	9.67e-06
CESC	SRSF12	HALLMARK_UV_RESPONSE_UP	0.202814	0.000356367
CESC	SRSF12	HALLMARK_WNT_BETA_CATENIN_SIGNALING	0.35484	1.65e-10
CESC	SRSF2	HALLMARK_ANGIOGENESIS	-0.234618	3.39e-05
CESC	SRSF2	HALLMARK_APICAL_SURFACE	0.113576	0.0471367
CESC	SRSF2	HALLMARK_APOPTOSIS	-0.178405	0.00172907
CESC	SRSF2	HALLMARK_COAGULATION	-0.317738	1.32e-08
CESC	SRSF2	HALLMARK_COMPLEMENT	-0.146621	0.0102221
CESC	SRSF2	HALLMARK_DNA_REPAIR	0.157418	0.00578638
CESC	SRSF2	HALLMARK_E2F_TARGETS	0.464451	8.88e-18
CESC	SRSF2	HALLMARK_EPITHELIAL_MESENCHYMAL_TRANSITION	-0.18151	0.00142932
CESC	SRSF2	HALLMARK_FATTY_ACID_METABOLISM	0.198556	0.000475941
CESC	SRSF2	HALLMARK_G2M_CHECKPOINT	0.456288	3.85e-17
CESC	SRSF2	HALLMARK_HEME_METABOLISM	0.219938	0.000104796
CESC	SRSF2	HALLMARK_IL6_JAK_STAT3_SIGNALING	-0.116384	0.0419042
CESC	SRSF2	HALLMARK_INFLAMMATORY_RESPONSE	-0.137101	0.016403
CESC	SRSF2	HALLMARK_MITOTIC_SPINDLE	0.396897	5.48e-13
CESC	SRSF2	HALLMARK_MTORC1_SIGNALING	-0.163878	0.00404765
CESC	SRSF2	HALLMARK_MYOGENESIS	0.140371	0.0139863
CESC	SRSF2	HALLMARK_P53_PATHWAY	-0.141934	0.0129456
CESC	SRSF2	HALLMARK_PEROXISOME	0.182731	0.00132514
CESC	SRSF2	HALLMARK_PI3K_AKT_MTOR_SIGNALING	0.320837	9.36e-09
CESC	SRSF2	HALLMARK_TNFA_SIGNALING_VIA_NFKB	-0.234179	3.51e-05
CESC	SRSF2	HALLMARK_UNFOLDED_PROTEIN_RESPONSE	-0.220948	9.72e-05
CESC	SRSF2	HALLMARK_WNT_BETA_CATENIN_SIGNALING	0.220952	9.72e-05
CESC	SRSF2	HALLMARK_XENOBIOTIC_METABOLISM	0.169657	0.00290851
CESC	SRSF3	HALLMARK_ANDROGEN_RESPONSE	0.117416	0.0401083
CESC	SRSF3	HALLMARK_ANGIOGENESIS	-0.204191	0.000324133
CESC	SRSF3	HALLMARK_APOPTOSIS	-0.150518	0.00835796
CESC	SRSF3	HALLMARK_COAGULATION	-0.254739	6.41e-06
CESC	SRSF3	HALLMARK_COMPLEMENT	-0.134355	0.0187073
CESC	SRSF3	HALLMARK_DNA_REPAIR	0.242381	1.81e-05
CESC	SRSF3	HALLMARK_E2F_TARGETS	0.373112	1.53e-11
CESC	SRSF3	HALLMARK_EPITHELIAL_MESENCHYMAL_TRANSITION	-0.116388	0.0418975
CESC	SRSF3	HALLMARK_FATTY_ACID_METABOLISM	0.208848	0.000234099
CESC	SRSF3	HALLMARK_G2M_CHECKPOINT	0.402936	2.25e-13
CESC	SRSF3	HALLMARK_GLYCOLYSIS	0.125942	0.0276052
CESC	SRSF3	HALLMARK_HEME_METABOLISM	0.161401	0.00464912
CESC	SRSF3	HALLMARK_IL6_JAK_STAT3_SIGNALING	-0.120834	0.0346147
CESC	SRSF3	HALLMARK_INFLAMMATORY_RESPONSE	-0.148469	0.00929668
CESC	SRSF3	HALLMARK_INTERFERON_ALPHA_RESPONSE	-0.150051	0.00856433
CESC	SRSF3	HALLMARK_INTERFERON_GAMMA_RESPONSE	-0.132256	0.0206546
CESC	SRSF3	HALLMARK_MITOTIC_SPINDLE	0.194578	0.000620319
CESC	SRSF3	HALLMARK_MTORC1_SIGNALING	-0.181808	0.00140321
CESC	SRSF3	HALLMARK_MYC_TARGETS_V2	0.220478	0.000100672
CESC	SRSF3	HALLMARK_MYOGENESIS	0.234173	3.51e-05
CESC	SRSF3	HALLMARK_P53_PATHWAY	-0.210084	0.000214485
CESC	SRSF3	HALLMARK_PEROXISOME	0.187595	0.000975651
CESC	SRSF3	HALLMARK_PI3K_AKT_MTOR_SIGNALING	0.207354	0.000260068
CESC	SRSF3	HALLMARK_PROTEIN_SECRETION	-0.129508	0.0234668
CESC	SRSF3	HALLMARK_TNFA_SIGNALING_VIA_NFKB	-0.182147	0.00137407
CESC	SRSF3	HALLMARK_UNFOLDED_PROTEIN_RESPONSE	-0.260449	3.89e-06
CESC	SRSF3	HALLMARK_UV_RESPONSE_UP	0.165574	0.00367745
CESC	SRSF3	HALLMARK_WNT_BETA_CATENIN_SIGNALING	0.213416	0.000168965
CESC	SRSF3	HALLMARK_XENOBIOTIC_METABOLISM	0.162156	0.00445784
CESC	SRSF4	HALLMARK_ADIPOGENESIS	-0.115257	0.0439425
CESC	SRSF4	HALLMARK_ANGIOGENESIS	-0.207413	0.000258989
CESC	SRSF4	HALLMARK_CHOLESTEROL_HOMEOSTASIS	-0.257653	4.97e-06
CESC	SRSF4	HALLMARK_COAGULATION	-0.370737	2.1e-11
CESC	SRSF4	HALLMARK_COMPLEMENT	-0.133416	0.0195581
CESC	SRSF4	HALLMARK_DNA_REPAIR	-0.127872	0.0252941
CESC	SRSF4	HALLMARK_E2F_TARGETS	0.438123	8.77e-16
CESC	SRSF4	HALLMARK_G2M_CHECKPOINT	0.418041	2.25e-14
CESC	SRSF4	HALLMARK_GLYCOLYSIS	-0.206392	0.000278173
CESC	SRSF4	HALLMARK_KRAS_SIGNALING_DN	0.199938	0.000433549
CESC	SRSF4	HALLMARK_MITOTIC_SPINDLE	0.438443	8.32e-16
CESC	SRSF4	HALLMARK_MYC_TARGETS_V2	-0.179213	0.001646
CESC	SRSF4	HALLMARK_NOTCH_SIGNALING	-0.132034	0.0208703
CESC	SRSF4	HALLMARK_OXIDATIVE_PHOSPHORYLATION	-0.180062	0.00156257
CESC	SRSF4	HALLMARK_PANCREAS_BETA_CELLS	-0.212568	0.000179608
CESC	SRSF4	HALLMARK_PI3K_AKT_MTOR_SIGNALING	0.305927	4.73e-08
CESC	SRSF4	HALLMARK_REACTIVE_OXYGEN_SPECIES_PATHWAY	-0.1718	0.00256626
CESC	SRSF4	HALLMARK_UNFOLDED_PROTEIN_RESPONSE	-0.189381	0.000870227
CESC	SRSF4	HALLMARK_UV_RESPONSE_DN	0.117003	0.040818
CESC	SRSF4	HALLMARK_UV_RESPONSE_UP	-0.172623	0.00244488
CESC	SRSF4	HALLMARK_WNT_BETA_CATENIN_SIGNALING	0.147505	0.00976975
CESC	SRSF5	HALLMARK_ANDROGEN_RESPONSE	0.177516	0.0018249
CESC	SRSF5	HALLMARK_ANGIOGENESIS	-0.146627	0.0102191
CESC	SRSF5	HALLMARK_APICAL_SURFACE	0.121897	0.0330429
CESC	SRSF5	HALLMARK_CHOLESTEROL_HOMEOSTASIS	-0.216207	0.000137973
CESC	SRSF5	HALLMARK_COAGULATION	-0.276781	8.73e-07
CESC	SRSF5	HALLMARK_COMPLEMENT	-0.140653	0.0137931
CESC	SRSF5	HALLMARK_E2F_TARGETS	0.304431	5.54e-08
CESC	SRSF5	HALLMARK_ESTROGEN_RESPONSE_EARLY	0.135521	0.0176966
CESC	SRSF5	HALLMARK_G2M_CHECKPOINT	0.275621	9.74e-07
CESC	SRSF5	HALLMARK_HYPOXIA	-0.13745	0.0161288
CESC	SRSF5	HALLMARK_IL2_STAT5_SIGNALING	-0.141771	0.0130506
CESC	SRSF5	HALLMARK_KRAS_SIGNALING_DN	0.130176	0.0227543
CESC	SRSF5	HALLMARK_MITOTIC_SPINDLE	0.394265	8.02e-13
CESC	SRSF5	HALLMARK_MTORC1_SIGNALING	-0.113021	0.0482335
CESC	SRSF5	HALLMARK_MYC_TARGETS_V2	-0.154023	0.00694644
CESC	SRSF5	HALLMARK_PI3K_AKT_MTOR_SIGNALING	0.142254	0.012741
CESC	SRSF5	HALLMARK_PROTEIN_SECRETION	0.117232	0.0404231
CESC	SRSF5	HALLMARK_REACTIVE_OXYGEN_SPECIES_PATHWAY	-0.206796	0.000270421
CESC	SRSF5	HALLMARK_TGF_BETA_SIGNALING	0.158975	0.00531514
CESC	SRSF5	HALLMARK_UV_RESPONSE_DN	0.15593	0.00627161
CESC	SRSF5	HALLMARK_UV_RESPONSE_UP	-0.195645	0.000578078
CESC	SRSF5	HALLMARK_WNT_BETA_CATENIN_SIGNALING	0.185929	0.00108444
CESC	SRSF6	HALLMARK_ALLOGRAFT_REJECTION	-0.223746	7.88e-05
CESC	SRSF6	HALLMARK_ANDROGEN_RESPONSE	0.34375	6.5e-10
CESC	SRSF6	HALLMARK_APOPTOSIS	-0.291166	2.16e-07
CESC	SRSF6	HALLMARK_BILE_ACID_METABOLISM	0.164624	0.0038808
CESC	SRSF6	HALLMARK_COAGULATION	-0.120182	0.0356108
CESC	SRSF6	HALLMARK_COMPLEMENT	-0.227796	5.78e-05
CESC	SRSF6	HALLMARK_DNA_REPAIR	0.222113	8.91e-05
CESC	SRSF6	HALLMARK_E2F_TARGETS	0.282089	5.26e-07
CESC	SRSF6	HALLMARK_ESTROGEN_RESPONSE_EARLY	0.1299	0.023047
CESC	SRSF6	HALLMARK_FATTY_ACID_METABOLISM	0.163075	0.00423449
CESC	SRSF6	HALLMARK_G2M_CHECKPOINT	0.296069	1.32e-07
CESC	SRSF6	HALLMARK_GLYCOLYSIS	0.208025	0.000248083
CESC	SRSF6	HALLMARK_HEDGEHOG_SIGNALING	0.176998	0.00188291
CESC	SRSF6	HALLMARK_HEME_METABOLISM	0.249217	1.03e-05
CESC	SRSF6	HALLMARK_HYPOXIA	-0.139758	0.014414
CESC	SRSF6	HALLMARK_IL2_STAT5_SIGNALING	-0.292125	1.96e-07
CESC	SRSF6	HALLMARK_IL6_JAK_STAT3_SIGNALING	-0.274008	1.13e-06
CESC	SRSF6	HALLMARK_INFLAMMATORY_RESPONSE	-0.338951	1.16e-09
CESC	SRSF6	HALLMARK_INTERFERON_ALPHA_RESPONSE	-0.243903	1.6e-05
CESC	SRSF6	HALLMARK_INTERFERON_GAMMA_RESPONSE	-0.264307	2.76e-06
CESC	SRSF6	HALLMARK_KRAS_SIGNALING_DN	-0.158619	0.00541971
CESC	SRSF6	HALLMARK_MITOTIC_SPINDLE	0.452667	7.29e-17
CESC	SRSF6	HALLMARK_MTORC1_SIGNALING	-0.140468	0.0139198
CESC	SRSF6	HALLMARK_NOTCH_SIGNALING	0.199124	0.000458078
CESC	SRSF6	HALLMARK_P53_PATHWAY	-0.387423	2.13e-12
CESC	SRSF6	HALLMARK_PANCREAS_BETA_CELLS	0.191056	0.000781014
CESC	SRSF6	HALLMARK_PEROXISOME	0.240571	2.1e-05
CESC	SRSF6	HALLMARK_PROTEIN_SECRETION	0.295321	1.42e-07
CESC	SRSF6	HALLMARK_TGF_BETA_SIGNALING	0.170275	0.00280575
CESC	SRSF6	HALLMARK_TNFA_SIGNALING_VIA_NFKB	-0.371862	1.81e-11
CESC	SRSF6	HALLMARK_UV_RESPONSE_DN	0.294391	1.56e-07
CESC	SRSF6	HALLMARK_WNT_BETA_CATENIN_SIGNALING	0.265904	2.39e-06
CESC	SRSF6	HALLMARK_XENOBIOTIC_METABOLISM	0.248276	1.11e-05
CESC	SRSF7	HALLMARK_ANDROGEN_RESPONSE	0.140108	0.0141684
CESC	SRSF7	HALLMARK_ANGIOGENESIS	-0.201197	0.00039802
CESC	SRSF7	HALLMARK_APOPTOSIS	-0.208954	0.000232357
CESC	SRSF7	HALLMARK_BILE_ACID_METABOLISM	0.142071	0.0128575
CESC	SRSF7	HALLMARK_COAGULATION	-0.300157	8.65e-08
CESC	SRSF7	HALLMARK_COMPLEMENT	-0.165016	0.00379563
CESC	SRSF7	HALLMARK_DNA_REPAIR	0.228477	5.49e-05
CESC	SRSF7	HALLMARK_E2F_TARGETS	0.413465	4.58e-14
CESC	SRSF7	HALLMARK_EPITHELIAL_MESENCHYMAL_TRANSITION	-0.171058	0.00268029
CESC	SRSF7	HALLMARK_FATTY_ACID_METABOLISM	0.205559	0.000294806
CESC	SRSF7	HALLMARK_G2M_CHECKPOINT	0.395153	7.06e-13
CESC	SRSF7	HALLMARK_GLYCOLYSIS	0.157819	0.00566165
CESC	SRSF7	HALLMARK_HEDGEHOG_SIGNALING	0.113091	0.0480941
CESC	SRSF7	HALLMARK_HEME_METABOLISM	0.256536	5.48e-06
CESC	SRSF7	HALLMARK_HYPOXIA	-0.137294	0.0162515
CESC	SRSF7	HALLMARK_IL6_JAK_STAT3_SIGNALING	-0.150362	0.00842616
CESC	SRSF7	HALLMARK_INFLAMMATORY_RESPONSE	-0.234375	3.46e-05
CESC	SRSF7	HALLMARK_INTERFERON_ALPHA_RESPONSE	-0.134715	0.01839
CESC	SRSF7	HALLMARK_INTERFERON_GAMMA_RESPONSE	-0.127436	0.0258007
CESC	SRSF7	HALLMARK_MITOTIC_SPINDLE	0.365974	3.94e-11
CESC	SRSF7	HALLMARK_MTORC1_SIGNALING	-0.203771	0.000333646
CESC	SRSF7	HALLMARK_MYC_TARGETS_V2	0.157969	0.00561553
CESC	SRSF7	HALLMARK_MYOGENESIS	0.129326	0.0236642
CESC	SRSF7	HALLMARK_P53_PATHWAY	-0.318565	1.21e-08
CESC	SRSF7	HALLMARK_PEROXISOME	0.258836	4.48e-06
CESC	SRSF7	HALLMARK_PI3K_AKT_MTOR_SIGNALING	0.257119	5.21e-06
CESC	SRSF7	HALLMARK_TNFA_SIGNALING_VIA_NFKB	-0.27423	1.11e-06
CESC	SRSF7	HALLMARK_UNFOLDED_PROTEIN_RESPONSE	-0.133986	0.0190379
CESC	SRSF7	HALLMARK_UV_RESPONSE_DN	0.135648	0.0175898
CESC	SRSF7	HALLMARK_WNT_BETA_CATENIN_SIGNALING	0.244278	1.55e-05
CESC	SRSF7	HALLMARK_XENOBIOTIC_METABOLISM	0.211526	0.000193532
CESC	SRSF8	HALLMARK_ADIPOGENESIS	0.163422	0.00415289
CESC	SRSF8	HALLMARK_ALLOGRAFT_REJECTION	-0.244279	1.55e-05
CESC	SRSF8	HALLMARK_ANDROGEN_RESPONSE	0.308146	3.74e-08
CESC	SRSF8	HALLMARK_APICAL_JUNCTION	0.158392	0.00548747
CESC	SRSF8	HALLMARK_APOPTOSIS	-0.140548	0.0138645
CESC	SRSF8	HALLMARK_BILE_ACID_METABOLISM	0.119275	0.0370361
CESC	SRSF8	HALLMARK_COAGULATION	0.123771	0.0304201
CESC	SRSF8	HALLMARK_COMPLEMENT	-0.246088	1.33e-05
CESC	SRSF8	HALLMARK_E2F_TARGETS	0.115178	0.0440884
CESC	SRSF8	HALLMARK_ESTROGEN_RESPONSE_EARLY	0.193588	0.000662111
CESC	SRSF8	HALLMARK_HEDGEHOG_SIGNALING	0.161352	0.00466191
CESC	SRSF8	HALLMARK_HEME_METABOLISM	0.124622	0.0292882
CESC	SRSF8	HALLMARK_HYPOXIA	-0.240974	2.03e-05
CESC	SRSF8	HALLMARK_IL2_STAT5_SIGNALING	-0.207512	0.0002572
CESC	SRSF8	HALLMARK_IL6_JAK_STAT3_SIGNALING	-0.241175	2e-05
CESC	SRSF8	HALLMARK_INFLAMMATORY_RESPONSE	-0.261147	3.65e-06
CESC	SRSF8	HALLMARK_INTERFERON_ALPHA_RESPONSE	-0.223356	8.11e-05
CESC	SRSF8	HALLMARK_INTERFERON_GAMMA_RESPONSE	-0.243778	1.62e-05
CESC	SRSF8	HALLMARK_KRAS_SIGNALING_DN	-0.137828	0.0158366
CESC	SRSF8	HALLMARK_MITOTIC_SPINDLE	0.240166	2.17e-05
CESC	SRSF8	HALLMARK_NOTCH_SIGNALING	0.290909	2.21e-07
CESC	SRSF8	HALLMARK_P53_PATHWAY	-0.21651	0.000134944
CESC	SRSF8	HALLMARK_PANCREAS_BETA_CELLS	0.193125	0.000682523
CESC	SRSF8	HALLMARK_PEROXISOME	0.183143	0.00129157
CESC	SRSF8	HALLMARK_PROTEIN_SECRETION	0.270474	1.57e-06
CESC	SRSF8	HALLMARK_REACTIVE_OXYGEN_SPECIES_PATHWAY	-0.116166	0.0422918
CESC	SRSF8	HALLMARK_TGF_BETA_SIGNALING	0.179112	0.00165617
CESC	SRSF8	HALLMARK_TNFA_SIGNALING_VIA_NFKB	-0.244559	1.52e-05
CESC	SRSF8	HALLMARK_UV_RESPONSE_DN	0.293154	1.77e-07
CESC	SRSF8	HALLMARK_UV_RESPONSE_UP	-0.171404	0.0026265
CESC	SRSF8	HALLMARK_WNT_BETA_CATENIN_SIGNALING	0.175472	0.00206386
CESC	SRSF9	HALLMARK_ALLOGRAFT_REJECTION	-0.200457	0.000418579
CESC	SRSF9	HALLMARK_ANDROGEN_RESPONSE	0.130251	0.022676
CESC	SRSF9	HALLMARK_APICAL_JUNCTION	0.174395	0.00220103
CESC	SRSF9	HALLMARK_APOPTOSIS	-0.112853	0.0485694
CESC	SRSF9	HALLMARK_COAGULATION	-0.258894	4.46e-06
CESC	SRSF9	HALLMARK_COMPLEMENT	-0.299568	9.19e-08
CESC	SRSF9	HALLMARK_E2F_TARGETS	0.300107	8.69e-08
CESC	SRSF9	HALLMARK_ESTROGEN_RESPONSE_LATE	-0.180295	0.00154046
CESC	SRSF9	HALLMARK_G2M_CHECKPOINT	0.290422	2.32e-07
CESC	SRSF9	HALLMARK_HEDGEHOG_SIGNALING	0.259389	4.27e-06
CESC	SRSF9	HALLMARK_IL2_STAT5_SIGNALING	-0.15265	0.00747173
CESC	SRSF9	HALLMARK_IL6_JAK_STAT3_SIGNALING	-0.16025	0.00495499
CESC	SRSF9	HALLMARK_INTERFERON_ALPHA_RESPONSE	-0.259521	4.22e-06
CESC	SRSF9	HALLMARK_INTERFERON_GAMMA_RESPONSE	-0.208847	0.000234117
CESC	SRSF9	HALLMARK_MITOTIC_SPINDLE	0.414992	3.62e-14
CESC	SRSF9	HALLMARK_MYOGENESIS	0.151485	0.00794497
CESC	SRSF9	HALLMARK_P53_PATHWAY	-0.186698	0.00103287
CESC	SRSF9	HALLMARK_PI3K_AKT_MTOR_SIGNALING	0.121528	0.0335819
CESC	SRSF9	HALLMARK_REACTIVE_OXYGEN_SPECIES_PATHWAY	-0.154257	0.00686015
CESC	SRSF9	HALLMARK_TNFA_SIGNALING_VIA_NFKB	-0.167188	0.00335377
CESC	SRSF9	HALLMARK_UV_RESPONSE_DN	0.229617	5.02e-05
CESC	SRSF9	HALLMARK_WNT_BETA_CATENIN_SIGNALING	0.376098	1.02e-11
CHOL	SRSF1	HALLMARK_ADIPOGENESIS	-0.449977	0.00589447
CHOL	SRSF1	HALLMARK_E2F_TARGETS	0.355183	0.0335242
CHOL	SRSF1	HALLMARK_G2M_CHECKPOINT	0.480911	0.00298747
CHOL	SRSF1	HALLMARK_MITOTIC_SPINDLE	0.494639	0.00216474
CHOL	SRSF1	HALLMARK_MYC_TARGETS_V1	0.353475	0.0344464
CHOL	SRSF1	HALLMARK_OXIDATIVE_PHOSPHORYLATION	-0.353475	0.0344464
CHOL	SRSF1	HALLMARK_UV_RESPONSE_UP	-0.365842	0.028215
CHOL	SRSF10	HALLMARK_ADIPOGENESIS	-0.471515	0.00369672
CHOL	SRSF10	HALLMARK_G2M_CHECKPOINT	0.368913	0.0268207
CHOL	SRSF10	HALLMARK_HEDGEHOG_SIGNALING	0.335081	0.0457487
CHOL	SRSF10	HALLMARK_UV_RESPONSE_UP	-0.443265	0.00677679
CHOL	SRSF11	HALLMARK_GLYCOLYSIS	-0.352551	0.0349538
CHOL	SRSF11	HALLMARK_PI3K_AKT_MTOR_SIGNALING	0.332244	0.0477312
CHOL	SRSF12	HALLMARK_APICAL_JUNCTION	-0.343646	0.0401622
CHOL	SRSF12	HALLMARK_IL2_STAT5_SIGNALING	-0.345411	0.0390829
CHOL	SRSF2	HALLMARK_ADIPOGENESIS	-0.488694	0.0024928
CHOL	SRSF2	HALLMARK_CHOLESTEROL_HOMEOSTASIS	-0.339145	0.0430247
CHOL	SRSF2	HALLMARK_COAGULATION	-0.330242	0.049171
CHOL	SRSF2	HALLMARK_E2F_TARGETS	0.486253	0.00263959
CHOL	SRSF2	HALLMARK_G2M_CHECKPOINT	0.537708	0.000719375
CHOL	SRSF2	HALLMARK_MITOTIC_SPINDLE	0.375963	0.0238341
CHOL	SRSF2	HALLMARK_MYC_TARGETS_V1	0.47234	0.00362904
CHOL	SRSF2	HALLMARK_MYC_TARGETS_V2	0.371894	0.0255223
CHOL	SRSF2	HALLMARK_OXIDATIVE_PHOSPHORYLATION	-0.47234	0.00362904
CHOL	SRSF2	HALLMARK_PI3K_AKT_MTOR_SIGNALING	0.422822	0.0101945
CHOL	SRSF2	HALLMARK_WNT_BETA_CATENIN_SIGNALING	0.394201	0.0173614
CHOL	SRSF3	HALLMARK_ADIPOGENESIS	-0.362514	0.0297929
CHOL	SRSF3	HALLMARK_BILE_ACID_METABOLISM	-0.496733	0.00205852
CHOL	SRSF3	HALLMARK_COAGULATION	-0.406184	0.0139674
CHOL	SRSF3	HALLMARK_MYC_TARGETS_V2	0.332944	0.047236
CHOL	SRSF3	HALLMARK_PEROXISOME	-0.376835	0.0234846
CHOL	SRSF3	HALLMARK_PI3K_AKT_MTOR_SIGNALING	0.344084	0.0398925
CHOL	SRSF3	HALLMARK_WNT_BETA_CATENIN_SIGNALING	0.420294	0.0107046
CHOL	SRSF3	HALLMARK_XENOBIOTIC_METABOLISM	-0.4718	0.00367324
CHOL	SRSF4	HALLMARK_ALLOGRAFT_REJECTION	0.414065	0.0120549
CHOL	SRSF4	HALLMARK_ANGIOGENESIS	-0.405946	0.0140287
CHOL	SRSF4	HALLMARK_CHOLESTEROL_HOMEOSTASIS	-0.347402	0.0378938
CHOL	SRSF4	HALLMARK_COAGULATION	-0.383363	0.021001
CHOL	SRSF4	HALLMARK_G2M_CHECKPOINT	0.343812	0.0400596
CHOL	SRSF4	HALLMARK_PI3K_AKT_MTOR_SIGNALING	0.539326	0.000688208
CHOL	SRSF4	HALLMARK_PROTEIN_SECRETION	-0.341425	0.041555
CHOL	SRSF4	HALLMARK_UNFOLDED_PROTEIN_RESPONSE	-0.410613	0.0128634
CHOL	SRSF5	HALLMARK_ADIPOGENESIS	-0.336332	0.0448957
CHOL	SRSF5	HALLMARK_ALLOGRAFT_REJECTION	0.460074	0.00475397
CHOL	SRSF5	HALLMARK_CHOLESTEROL_HOMEOSTASIS	-0.38774	0.0194613
CHOL	SRSF5	HALLMARK_IL2_STAT5_SIGNALING	0.37123	0.0258069
CHOL	SRSF5	HALLMARK_INFLAMMATORY_RESPONSE	0.439502	0.00731929
CHOL	SRSF5	HALLMARK_UNFOLDED_PROTEIN_RESPONSE	-0.404241	0.0144761
CHOL	SRSF6	HALLMARK_ADIPOGENESIS	-0.408254	0.0134418
CHOL	SRSF6	HALLMARK_NOTCH_SIGNALING	0.351121	0.0357506
CHOL	SRSF6	HALLMARK_WNT_BETA_CATENIN_SIGNALING	0.381796	0.0215763
CHOL	SRSF7	HALLMARK_ADIPOGENESIS	-0.517684	0.00122238
CHOL	SRSF7	HALLMARK_ALLOGRAFT_REJECTION	0.470648	0.00376895
CHOL	SRSF7	HALLMARK_BILE_ACID_METABOLISM	-0.36493	0.0286406
CHOL	SRSF7	HALLMARK_CHOLESTEROL_HOMEOSTASIS	-0.356385	0.0328877
CHOL	SRSF7	HALLMARK_GLYCOLYSIS	-0.362861	0.0296248
CHOL	SRSF7	HALLMARK_IL2_STAT5_SIGNALING	0.330904	0.0486914
CHOL	SRSF7	HALLMARK_INFLAMMATORY_RESPONSE	0.335583	0.0454051
CHOL	SRSF7	HALLMARK_INTERFERON_GAMMA_RESPONSE	0.372563	0.0252381
CHOL	SRSF7	HALLMARK_MYC_TARGETS_V1	0.443036	0.00680874
CHOL	SRSF7	HALLMARK_OXIDATIVE_PHOSPHORYLATION	-0.443036	0.00680874
CHOL	SRSF7	HALLMARK_PROTEIN_SECRETION	-0.335343	0.0455691
CHOL	SRSF7	HALLMARK_UV_RESPONSE_UP	-0.398668	0.0160231
CHOL	SRSF8	HALLMARK_APOPTOSIS	0.513995	0.0013431
CHOL	SRSF8	HALLMARK_BILE_ACID_METABOLISM	-0.354242	0.0340297
CHOL	SRSF8	HALLMARK_CHOLESTEROL_HOMEOSTASIS	-0.394084	0.0173977
CHOL	SRSF8	HALLMARK_E2F_TARGETS	-0.489663	0.00243652
CHOL	SRSF8	HALLMARK_FATTY_ACID_METABOLISM	-0.37945	0.022462
CHOL	SRSF8	HALLMARK_G2M_CHECKPOINT	-0.412365	0.0124475
CHOL	SRSF8	HALLMARK_GLYCOLYSIS	-0.400675	0.0154507
CHOL	SRSF8	HALLMARK_INTERFERON_ALPHA_RESPONSE	0.345549	0.0389994
CHOL	SRSF8	HALLMARK_KRAS_SIGNALING_DN	0.392273	0.0179669
CHOL	SRSF8	HALLMARK_MYC_TARGETS_V2	-0.335653	0.0453574
CHOL	SRSF8	HALLMARK_P53_PATHWAY	0.372013	0.0254715
CHOL	SRSF8	HALLMARK_TGF_BETA_SIGNALING	0.497721	0.00201003
CHOL	SRSF8	HALLMARK_TNFA_SIGNALING_VIA_NFKB	0.38355	0.0209332
CHOL	SRSF8	HALLMARK_UNFOLDED_PROTEIN_RESPONSE	-0.377174	0.02335
CHOL	SRSF8	HALLMARK_UV_RESPONSE_DN	0.357711	0.0321967
CHOL	SRSF8	HALLMARK_XENOBIOTIC_METABOLISM	-0.342004	0.0411885
COAD	SRSF1	HALLMARK_ADIPOGENESIS	-0.220259	1.39e-06
COAD	SRSF1	HALLMARK_ANDROGEN_RESPONSE	0.480877	1.26e-28
COAD	SRSF1	HALLMARK_APICAL_JUNCTION	-0.299027	3.48e-11
COAD	SRSF1	HALLMARK_APOPTOSIS	-0.136388	0.00301738
COAD	SRSF1	HALLMARK_CHOLESTEROL_HOMEOSTASIS	-0.281966	4.67e-10
COAD	SRSF1	HALLMARK_COAGULATION	-0.44353	4.05e-24
COAD	SRSF1	HALLMARK_COMPLEMENT	0.126423	0.00600619
COAD	SRSF1	HALLMARK_DNA_REPAIR	-0.189076	3.63e-05
COAD	SRSF1	HALLMARK_E2F_TARGETS	0.48729	1.85e-29
COAD	SRSF1	HALLMARK_ESTROGEN_RESPONSE_EARLY	-0.145579	0.00153533
COAD	SRSF1	HALLMARK_ESTROGEN_RESPONSE_LATE	-0.285993	2.57e-10
COAD	SRSF1	HALLMARK_FATTY_ACID_METABOLISM	-0.218609	1.67e-06
COAD	SRSF1	HALLMARK_G2M_CHECKPOINT	0.617717	6.77e-51
COAD	SRSF1	HALLMARK_GLYCOLYSIS	-0.149722	0.00111762
COAD	SRSF1	HALLMARK_HEDGEHOG_SIGNALING	0.111424	0.0155508
COAD	SRSF1	HALLMARK_HYPOXIA	-0.207421	5.65e-06
COAD	SRSF1	HALLMARK_IL2_STAT5_SIGNALING	0.121731	0.00817633
COAD	SRSF1	HALLMARK_INFLAMMATORY_RESPONSE	0.141343	0.00210649
COAD	SRSF1	HALLMARK_KRAS_SIGNALING_UP	0.200008	1.22e-05
COAD	SRSF1	HALLMARK_MITOTIC_SPINDLE	0.577818	2.67e-43
COAD	SRSF1	HALLMARK_MTORC1_SIGNALING	0.147115	0.00136612
COAD	SRSF1	HALLMARK_MYOGENESIS	-0.277442	9.02e-10
COAD	SRSF1	HALLMARK_NOTCH_SIGNALING	-0.28884	1.67e-10
COAD	SRSF1	HALLMARK_OXIDATIVE_PHOSPHORYLATION	-0.182452	6.82e-05
COAD	SRSF1	HALLMARK_P53_PATHWAY	-0.510736	1.18e-32
COAD	SRSF1	HALLMARK_PANCREAS_BETA_CELLS	-0.190154	3.27e-05
COAD	SRSF1	HALLMARK_PEROXISOME	-0.100747	0.0287988
COAD	SRSF1	HALLMARK_PI3K_AKT_MTOR_SIGNALING	0.327553	3.05e-13
COAD	SRSF1	HALLMARK_PROTEIN_SECRETION	0.495534	1.49e-30
COAD	SRSF1	HALLMARK_REACTIVE_OXYGEN_SPECIES_PATHWAY	-0.550853	9.93e-39
COAD	SRSF1	HALLMARK_SPERMATOGENESIS	0.217837	1.82e-06
COAD	SRSF1	HALLMARK_UNFOLDED_PROTEIN_RESPONSE	-0.219712	1.47e-06
COAD	SRSF1	HALLMARK_UV_RESPONSE_DN	0.364316	3.14e-16
COAD	SRSF1	HALLMARK_UV_RESPONSE_UP	-0.398886	2.05e-19
COAD	SRSF1	HALLMARK_WNT_BETA_CATENIN_SIGNALING	-0.273287	1.64e-09
COAD	SRSF1	HALLMARK_XENOBIOTIC_METABOLISM	-0.207756	5.45e-06
COAD	SRSF10	HALLMARK_ADIPOGENESIS	-0.225007	8.07e-07
COAD	SRSF10	HALLMARK_ANDROGEN_RESPONSE	0.592273	6.26e-46
COAD	SRSF10	HALLMARK_ANGIOGENESIS	0.148708	0.00120885
COAD	SRSF10	HALLMARK_APICAL_JUNCTION	-0.299172	3.4e-11
COAD	SRSF10	HALLMARK_APICAL_SURFACE	-0.15653	0.000651741
COAD	SRSF10	HALLMARK_BILE_ACID_METABOLISM	0.0997444	0.0304371
COAD	SRSF10	HALLMARK_CHOLESTEROL_HOMEOSTASIS	-0.399441	1.81e-19
COAD	SRSF10	HALLMARK_COAGULATION	-0.400142	1.54e-19
COAD	SRSF10	HALLMARK_COMPLEMENT	0.198614	1.41e-05
COAD	SRSF10	HALLMARK_DNA_REPAIR	-0.360692	6.44e-16
COAD	SRSF10	HALLMARK_E2F_TARGETS	0.328341	2.66e-13
COAD	SRSF10	HALLMARK_ESTROGEN_RESPONSE_EARLY	-0.194695	2.09e-05
COAD	SRSF10	HALLMARK_ESTROGEN_RESPONSE_LATE	-0.388067	2.24e-18
COAD	SRSF10	HALLMARK_FATTY_ACID_METABOLISM	-0.256886	1.55e-08
COAD	SRSF10	HALLMARK_G2M_CHECKPOINT	0.487267	1.86e-29
COAD	SRSF10	HALLMARK_GLYCOLYSIS	-0.269723	2.7e-09
COAD	SRSF10	HALLMARK_HEDGEHOG_SIGNALING	0.219173	1.57e-06
COAD	SRSF10	HALLMARK_HYPOXIA	-0.12089	0.00863198
COAD	SRSF10	HALLMARK_IL2_STAT5_SIGNALING	0.184868	5.43e-05
COAD	SRSF10	HALLMARK_INFLAMMATORY_RESPONSE	0.204299	7.85e-06
COAD	SRSF10	HALLMARK_KRAS_SIGNALING_UP	0.366949	1.85e-16
COAD	SRSF10	HALLMARK_MITOTIC_SPINDLE	0.568162	1.29e-41
COAD	SRSF10	HALLMARK_MTORC1_SIGNALING	0.0955741	0.0381316
COAD	SRSF10	HALLMARK_MYC_TARGETS_V1	-0.156765	0.00063947
COAD	SRSF10	HALLMARK_MYC_TARGETS_V2	-0.289134	1.6e-10
COAD	SRSF10	HALLMARK_MYOGENESIS	-0.253893	2.31e-08
COAD	SRSF10	HALLMARK_NOTCH_SIGNALING	-0.287638	2.01e-10
COAD	SRSF10	HALLMARK_OXIDATIVE_PHOSPHORYLATION	-0.315326	2.48e-12
COAD	SRSF10	HALLMARK_P53_PATHWAY	-0.534996	3.14e-36
COAD	SRSF10	HALLMARK_PANCREAS_BETA_CELLS	-0.187053	4.41e-05
COAD	SRSF10	HALLMARK_PEROXISOME	-0.12433	0.00690093
COAD	SRSF10	HALLMARK_PI3K_AKT_MTOR_SIGNALING	0.455169	1.82e-25
COAD	SRSF10	HALLMARK_PROTEIN_SECRETION	0.572845	2e-42
COAD	SRSF10	HALLMARK_REACTIVE_OXYGEN_SPECIES_PATHWAY	-0.644552	1.19e-56
COAD	SRSF10	HALLMARK_SPERMATOGENESIS	0.208259	5.17e-06
COAD	SRSF10	HALLMARK_TGF_BETA_SIGNALING	0.119456	0.00946156
COAD	SRSF10	HALLMARK_UNFOLDED_PROTEIN_RESPONSE	-0.280868	5.48e-10
COAD	SRSF10	HALLMARK_UV_RESPONSE_DN	0.533455	5.4e-36
COAD	SRSF10	HALLMARK_UV_RESPONSE_UP	-0.506873	4.13e-32
COAD	SRSF10	HALLMARK_WNT_BETA_CATENIN_SIGNALING	-0.248232	4.8e-08
COAD	SRSF10	HALLMARK_XENOBIOTIC_METABOLISM	-0.245468	6.82e-08
COAD	SRSF11	HALLMARK_ADIPOGENESIS	-0.244869	7.35e-08
COAD	SRSF11	HALLMARK_ALLOGRAFT_REJECTION	0.0910328	0.0483256
COAD	SRSF11	HALLMARK_ANDROGEN_RESPONSE	0.599287	2.97e-47
COAD	SRSF11	HALLMARK_ANGIOGENESIS	0.0920401	0.0458867
COAD	SRSF11	HALLMARK_APICAL_JUNCTION	-0.257713	1.39e-08
COAD	SRSF11	HALLMARK_CHOLESTEROL_HOMEOSTASIS	-0.400288	1.49e-19
COAD	SRSF11	HALLMARK_COAGULATION	-0.425575	3.84e-22
COAD	SRSF11	HALLMARK_COMPLEMENT	0.216765	2.05e-06
COAD	SRSF11	HALLMARK_DNA_REPAIR	-0.34787	7.62e-15
COAD	SRSF11	HALLMARK_E2F_TARGETS	0.213635	2.89e-06
COAD	SRSF11	HALLMARK_ESTROGEN_RESPONSE_EARLY	-0.196532	1.74e-05
COAD	SRSF11	HALLMARK_ESTROGEN_RESPONSE_LATE	-0.419634	1.63e-21
COAD	SRSF11	HALLMARK_FATTY_ACID_METABOLISM	-0.281283	5.16e-10
COAD	SRSF11	HALLMARK_G2M_CHECKPOINT	0.373419	4.95e-17
COAD	SRSF11	HALLMARK_GLYCOLYSIS	-0.298237	3.94e-11
COAD	SRSF11	HALLMARK_HEDGEHOG_SIGNALING	0.199197	1.33e-05
COAD	SRSF11	HALLMARK_HYPOXIA	-0.0921488	0.0456296
COAD	SRSF11	HALLMARK_IL2_STAT5_SIGNALING	0.216626	2.08e-06
COAD	SRSF11	HALLMARK_INFLAMMATORY_RESPONSE	0.216393	2.14e-06
COAD	SRSF11	HALLMARK_INTERFERON_GAMMA_RESPONSE	0.119704	0.00931352
COAD	SRSF11	HALLMARK_KRAS_SIGNALING_UP	0.322394	7.47e-13
COAD	SRSF11	HALLMARK_MITOTIC_SPINDLE	0.554323	2.7e-39
COAD	SRSF11	HALLMARK_MYC_TARGETS_V1	-0.139018	0.0024968
COAD	SRSF11	HALLMARK_MYC_TARGETS_V2	-0.287145	2.16e-10
COAD	SRSF11	HALLMARK_MYOGENESIS	-0.256298	1.68e-08
COAD	SRSF11	HALLMARK_NOTCH_SIGNALING	-0.228792	5.2e-07
COAD	SRSF11	HALLMARK_OXIDATIVE_PHOSPHORYLATION	-0.274773	1.32e-09
COAD	SRSF11	HALLMARK_P53_PATHWAY	-0.455198	1.81e-25
COAD	SRSF11	HALLMARK_PANCREAS_BETA_CELLS	-0.211112	3.81e-06
COAD	SRSF11	HALLMARK_PEROXISOME	-0.173383	0.000155871
COAD	SRSF11	HALLMARK_PI3K_AKT_MTOR_SIGNALING	0.373687	4.68e-17
COAD	SRSF11	HALLMARK_PROTEIN_SECRETION	0.645811	6.19e-57
COAD	SRSF11	HALLMARK_REACTIVE_OXYGEN_SPECIES_PATHWAY	-0.609558	2.97e-49
COAD	SRSF11	HALLMARK_SPERMATOGENESIS	0.231029	3.99e-07
COAD	SRSF11	HALLMARK_TGF_BETA_SIGNALING	0.182446	6.82e-05
COAD	SRSF11	HALLMARK_TNFA_SIGNALING_VIA_NFKB	0.0955755	0.0381288
COAD	SRSF11	HALLMARK_UNFOLDED_PROTEIN_RESPONSE	-0.201842	1.01e-05
COAD	SRSF11	HALLMARK_UV_RESPONSE_DN	0.53794	1.1e-36
COAD	SRSF11	HALLMARK_UV_RESPONSE_UP	-0.554686	2.36e-39
COAD	SRSF11	HALLMARK_WNT_BETA_CATENIN_SIGNALING	-0.295452	6.09e-11
COAD	SRSF11	HALLMARK_XENOBIOTIC_METABOLISM	-0.263504	6.38e-09
COAD	SRSF12	HALLMARK_ADIPOGENESIS	-0.357242	1.27e-15
COAD	SRSF12	HALLMARK_ANDROGEN_RESPONSE	0.496356	1.15e-30
COAD	SRSF12	HALLMARK_ANGIOGENESIS	0.422771	7.62e-22
COAD	SRSF12	HALLMARK_APICAL_SURFACE	-0.12416	0.0069782
COAD	SRSF12	HALLMARK_APOPTOSIS	0.208931	4.81e-06
COAD	SRSF12	HALLMARK_BILE_ACID_METABOLISM	-0.104741	0.0230045
COAD	SRSF12	HALLMARK_CHOLESTEROL_HOMEOSTASIS	-0.431742	8.28e-23
COAD	SRSF12	HALLMARK_COAGULATION	-0.155034	0.00073517
COAD	SRSF12	HALLMARK_COMPLEMENT	0.274059	1.47e-09
COAD	SRSF12	HALLMARK_DNA_REPAIR	-0.677869	1.18e-64
COAD	SRSF12	HALLMARK_E2F_TARGETS	-0.237351	1.87e-07
COAD	SRSF12	HALLMARK_EPITHELIAL_MESENCHYMAL_TRANSITION	0.310445	5.56e-12
COAD	SRSF12	HALLMARK_ESTROGEN_RESPONSE_EARLY	-0.201606	1.04e-05
COAD	SRSF12	HALLMARK_ESTROGEN_RESPONSE_LATE	-0.462277	2.59e-26
COAD	SRSF12	HALLMARK_FATTY_ACID_METABOLISM	-0.380492	1.13e-17
COAD	SRSF12	HALLMARK_GLYCOLYSIS	-0.354184	2.29e-15
COAD	SRSF12	HALLMARK_HEDGEHOG_SIGNALING	0.284075	3.42e-10
COAD	SRSF12	HALLMARK_HYPOXIA	0.325139	4.65e-13
COAD	SRSF12	HALLMARK_IL2_STAT5_SIGNALING	0.321759	8.33e-13
COAD	SRSF12	HALLMARK_IL6_JAK_STAT3_SIGNALING	0.184616	5.56e-05
COAD	SRSF12	HALLMARK_INFLAMMATORY_RESPONSE	0.374461	3.99e-17
COAD	SRSF12	HALLMARK_INTERFERON_GAMMA_RESPONSE	0.127548	0.00556985
COAD	SRSF12	HALLMARK_KRAS_SIGNALING_UP	0.575708	6.3e-43
COAD	SRSF12	HALLMARK_MITOTIC_SPINDLE	0.215934	2.25e-06
COAD	SRSF12	HALLMARK_MTORC1_SIGNALING	-0.126293	0.00605872
COAD	SRSF12	HALLMARK_MYC_TARGETS_V1	-0.485928	2.79e-29
COAD	SRSF12	HALLMARK_MYC_TARGETS_V2	-0.737089	7.61e-82
COAD	SRSF12	HALLMARK_OXIDATIVE_PHOSPHORYLATION	-0.730907	7.74e-80
COAD	SRSF12	HALLMARK_P53_PATHWAY	-0.370454	9.09e-17
COAD	SRSF12	HALLMARK_PEROXISOME	-0.265748	4.69e-09
COAD	SRSF12	HALLMARK_PI3K_AKT_MTOR_SIGNALING	0.234215	2.73e-07
COAD	SRSF12	HALLMARK_PROTEIN_SECRETION	0.335886	6.95e-14
COAD	SRSF12	HALLMARK_REACTIVE_OXYGEN_SPECIES_PATHWAY	-0.497813	7.31e-31
COAD	SRSF12	HALLMARK_TGF_BETA_SIGNALING	0.38636	3.23e-18
COAD	SRSF12	HALLMARK_TNFA_SIGNALING_VIA_NFKB	0.273504	1.59e-09
COAD	SRSF12	HALLMARK_UNFOLDED_PROTEIN_RESPONSE	-0.36179	5.18e-16
COAD	SRSF12	HALLMARK_UV_RESPONSE_DN	0.666708	7.4e-62
COAD	SRSF12	HALLMARK_UV_RESPONSE_UP	-0.365167	2.65e-16
COAD	SRSF12	HALLMARK_WNT_BETA_CATENIN_SIGNALING	-0.226508	6.78e-07
COAD	SRSF12	HALLMARK_XENOBIOTIC_METABOLISM	-0.299187	3.4e-11
COAD	SRSF2	HALLMARK_ALLOGRAFT_REJECTION	0.1282	0.00533008
COAD	SRSF2	HALLMARK_ANDROGEN_RESPONSE	0.27139	2.14e-09
COAD	SRSF2	HALLMARK_ANGIOGENESIS	-0.118852	0.00983185
COAD	SRSF2	HALLMARK_APICAL_JUNCTION	-0.451313	5.16e-25
COAD	SRSF2	HALLMARK_APOPTOSIS	-0.164607	0.000333992
COAD	SRSF2	HALLMARK_BILE_ACID_METABOLISM	0.174787	0.000137492
COAD	SRSF2	HALLMARK_CHOLESTEROL_HOMEOSTASIS	-0.142097	0.00199235
COAD	SRSF2	HALLMARK_COAGULATION	-0.369505	1.1e-16
COAD	SRSF2	HALLMARK_DNA_REPAIR	0.0947207	0.0398945
COAD	SRSF2	HALLMARK_E2F_TARGETS	0.568429	1.16e-41
COAD	SRSF2	HALLMARK_EPITHELIAL_MESENCHYMAL_TRANSITION	-0.244573	7.63e-08
COAD	SRSF2	HALLMARK_ESTROGEN_RESPONSE_EARLY	-0.208179	5.21e-06
COAD	SRSF2	HALLMARK_ESTROGEN_RESPONSE_LATE	-0.125093	0.00656184
COAD	SRSF2	HALLMARK_G2M_CHECKPOINT	0.579677	1.25e-43
COAD	SRSF2	HALLMARK_HEDGEHOG_SIGNALING	-0.0993818	0.0310487
COAD	SRSF2	HALLMARK_HEME_METABOLISM	0.104612	0.0231747
COAD	SRSF2	HALLMARK_HYPOXIA	-0.274848	1.31e-09
COAD	SRSF2	HALLMARK_IL2_STAT5_SIGNALING	0.0980681	0.0333536
COAD	SRSF2	HALLMARK_INTERFERON_ALPHA_RESPONSE	0.0934029	0.0427521
COAD	SRSF2	HALLMARK_INTERFERON_GAMMA_RESPONSE	0.114853	0.0126227
COAD	SRSF2	HALLMARK_MITOTIC_SPINDLE	0.345077	1.29e-14
COAD	SRSF2	HALLMARK_MTORC1_SIGNALING	0.160981	0.000452642
COAD	SRSF2	HALLMARK_MYC_TARGETS_V2	0.15278	0.000879626
COAD	SRSF2	HALLMARK_MYOGENESIS	-0.280513	5.77e-10
COAD	SRSF2	HALLMARK_NOTCH_SIGNALING	-0.42951	1.45e-22
COAD	SRSF2	HALLMARK_P53_PATHWAY	-0.332062	1.38e-13
COAD	SRSF2	HALLMARK_PANCREAS_BETA_CELLS	-0.214176	2.73e-06
COAD	SRSF2	HALLMARK_PI3K_AKT_MTOR_SIGNALING	0.264185	5.81e-09
COAD	SRSF2	HALLMARK_PROTEIN_SECRETION	0.351896	3.55e-15
COAD	SRSF2	HALLMARK_REACTIVE_OXYGEN_SPECIES_PATHWAY	-0.368135	1.46e-16
COAD	SRSF2	HALLMARK_SPERMATOGENESIS	0.233462	2.99e-07
COAD	SRSF2	HALLMARK_TGF_BETA_SIGNALING	-0.273809	1.52e-09
COAD	SRSF2	HALLMARK_UNFOLDED_PROTEIN_RESPONSE	-0.113396	0.0138018
COAD	SRSF2	HALLMARK_UV_RESPONSE_UP	-0.184252	5.76e-05
COAD	SRSF2	HALLMARK_WNT_BETA_CATENIN_SIGNALING	-0.253733	2.36e-08
COAD	SRSF3	HALLMARK_ALLOGRAFT_REJECTION	0.13698	0.00289217
COAD	SRSF3	HALLMARK_ANDROGEN_RESPONSE	0.306085	1.13e-11
COAD	SRSF3	HALLMARK_APICAL_JUNCTION	-0.488724	1.2e-29
COAD	SRSF3	HALLMARK_APICAL_SURFACE	-0.139374	0.00243315
COAD	SRSF3	HALLMARK_APOPTOSIS	-0.11665	0.0112924
COAD	SRSF3	HALLMARK_BILE_ACID_METABOLISM	0.140815	0.00218988
COAD	SRSF3	HALLMARK_CHOLESTEROL_HOMEOSTASIS	-0.144274	0.00169398
COAD	SRSF3	HALLMARK_COAGULATION	-0.380727	1.08e-17
COAD	SRSF3	HALLMARK_COMPLEMENT	0.132576	0.00394768
COAD	SRSF3	HALLMARK_DNA_REPAIR	0.11104	0.0159125
COAD	SRSF3	HALLMARK_E2F_TARGETS	0.558867	4.81e-40
COAD	SRSF3	HALLMARK_EPITHELIAL_MESENCHYMAL_TRANSITION	-0.160316	0.000478289
COAD	SRSF3	HALLMARK_ESTROGEN_RESPONSE_EARLY	-0.242342	1.01e-07
COAD	SRSF3	HALLMARK_ESTROGEN_RESPONSE_LATE	-0.126569	0.00594786
COAD	SRSF3	HALLMARK_G2M_CHECKPOINT	0.560895	2.21e-40
COAD	SRSF3	HALLMARK_HEDGEHOG_SIGNALING	-0.0994022	0.0310141
COAD	SRSF3	HALLMARK_HYPOXIA	-0.270642	2.38e-09
COAD	SRSF3	HALLMARK_INTERFERON_GAMMA_RESPONSE	0.0962822	0.0367194
COAD	SRSF3	HALLMARK_MITOTIC_SPINDLE	0.250696	3.5e-08
COAD	SRSF3	HALLMARK_MTORC1_SIGNALING	0.220555	1.34e-06
COAD	SRSF3	HALLMARK_MYC_TARGETS_V2	0.151769	0.000952511
COAD	SRSF3	HALLMARK_MYOGENESIS	-0.243074	9.21e-08
COAD	SRSF3	HALLMARK_NOTCH_SIGNALING	-0.476635	4.36e-28
COAD	SRSF3	HALLMARK_OXIDATIVE_PHOSPHORYLATION	0.100479	0.0292297
COAD	SRSF3	HALLMARK_P53_PATHWAY	-0.356238	1.54e-15
COAD	SRSF3	HALLMARK_PANCREAS_BETA_CELLS	-0.179228	9.19e-05
COAD	SRSF3	HALLMARK_PI3K_AKT_MTOR_SIGNALING	0.254856	2.03e-08
COAD	SRSF3	HALLMARK_PROTEIN_SECRETION	0.394004	6.09e-19
COAD	SRSF3	HALLMARK_REACTIVE_OXYGEN_SPECIES_PATHWAY	-0.346724	9.45e-15
COAD	SRSF3	HALLMARK_SPERMATOGENESIS	0.197988	1.5e-05
COAD	SRSF3	HALLMARK_TGF_BETA_SIGNALING	-0.285749	2.66e-10
COAD	SRSF3	HALLMARK_UNFOLDED_PROTEIN_RESPONSE	-0.1067	0.0205519
COAD	SRSF3	HALLMARK_UV_RESPONSE_UP	-0.171803	0.000179281
COAD	SRSF3	HALLMARK_WNT_BETA_CATENIN_SIGNALING	-0.279278	6.91e-10
COAD	SRSF4	HALLMARK_ADIPOGENESIS	-0.103236	0.0250577
COAD	SRSF4	HALLMARK_ANDROGEN_RESPONSE	0.111446	0.01553
COAD	SRSF4	HALLMARK_APOPTOSIS	-0.119007	0.00973534
COAD	SRSF4	HALLMARK_CHOLESTEROL_HOMEOSTASIS	-0.108567	0.0184288
COAD	SRSF4	HALLMARK_COAGULATION	-0.221413	1.22e-06
COAD	SRSF4	HALLMARK_E2F_TARGETS	0.166006	0.000296524
COAD	SRSF4	HALLMARK_ESTROGEN_RESPONSE_LATE	-0.127208	0.00569854
COAD	SRSF4	HALLMARK_FATTY_ACID_METABOLISM	-0.170926	0.000193677
COAD	SRSF4	HALLMARK_G2M_CHECKPOINT	0.211499	3.65e-06
COAD	SRSF4	HALLMARK_GLYCOLYSIS	-0.0952418	0.0388102
COAD	SRSF4	HALLMARK_HYPOXIA	-0.105404	0.0221477
COAD	SRSF4	HALLMARK_INTERFERON_ALPHA_RESPONSE	0.132574	0.00394805
COAD	SRSF4	HALLMARK_KRAS_SIGNALING_DN	0.123732	0.00717759
COAD	SRSF4	HALLMARK_MITOTIC_SPINDLE	0.376027	2.88e-17
COAD	SRSF4	HALLMARK_NOTCH_SIGNALING	-0.117785	0.0105167
COAD	SRSF4	HALLMARK_P53_PATHWAY	-0.136416	0.0030113
COAD	SRSF4	HALLMARK_PEROXISOME	-0.160026	0.000489861
COAD	SRSF4	HALLMARK_PROTEIN_SECRETION	0.201911	1.01e-05
COAD	SRSF4	HALLMARK_REACTIVE_OXYGEN_SPECIES_PATHWAY	-0.175623	0.000127548
COAD	SRSF4	HALLMARK_SPERMATOGENESIS	0.0917333	0.0466182
COAD	SRSF4	HALLMARK_UV_RESPONSE_DN	0.102866	0.0255853
COAD	SRSF4	HALLMARK_UV_RESPONSE_UP	-0.21589	2.26e-06
COAD	SRSF4	HALLMARK_XENOBIOTIC_METABOLISM	-0.109137	0.0178204
COAD	SRSF5	HALLMARK_ANDROGEN_RESPONSE	0.228065	5.66e-07
COAD	SRSF5	HALLMARK_ANGIOGENESIS	-0.142243	0.00197085
COAD	SRSF5	HALLMARK_APOPTOSIS	-0.10217	0.0266058
COAD	SRSF5	HALLMARK_COAGULATION	-0.184857	5.44e-05
COAD	SRSF5	HALLMARK_E2F_TARGETS	0.113651	0.0135885
COAD	SRSF5	HALLMARK_ESTROGEN_RESPONSE_LATE	-0.0993648	0.0310777
COAD	SRSF5	HALLMARK_G2M_CHECKPOINT	0.142757	0.0018972
COAD	SRSF5	HALLMARK_GLYCOLYSIS	-0.147037	0.0013742
COAD	SRSF5	HALLMARK_HEME_METABOLISM	0.113789	0.0134741
COAD	SRSF5	HALLMARK_HYPOXIA	-0.138795	0.00253754
COAD	SRSF5	HALLMARK_IL2_STAT5_SIGNALING	0.0940026	0.0414309
COAD	SRSF5	HALLMARK_KRAS_SIGNALING_DN	0.0923815	0.0450838
COAD	SRSF5	HALLMARK_MITOTIC_SPINDLE	0.329051	2.35e-13
COAD	SRSF5	HALLMARK_NOTCH_SIGNALING	-0.123584	0.00724719
COAD	SRSF5	HALLMARK_P53_PATHWAY	-0.148409	0.00123705
COAD	SRSF5	HALLMARK_PANCREAS_BETA_CELLS	-0.104581	0.0232156
COAD	SRSF5	HALLMARK_PROTEIN_SECRETION	0.268596	3.16e-09
COAD	SRSF5	HALLMARK_REACTIVE_OXYGEN_SPECIES_PATHWAY	-0.212868	3.15e-06
COAD	SRSF5	HALLMARK_SPERMATOGENESIS	0.106874	0.0203453
COAD	SRSF5	HALLMARK_UV_RESPONSE_DN	0.12046	0.00887358
COAD	SRSF5	HALLMARK_UV_RESPONSE_UP	-0.180014	8.55e-05
COAD	SRSF5	HALLMARK_XENOBIOTIC_METABOLISM	-0.0937826	0.0419116
COAD	SRSF6	HALLMARK_ALLOGRAFT_REJECTION	-0.0905836	0.0494477
COAD	SRSF6	HALLMARK_ANDROGEN_RESPONSE	0.268732	3.1e-09
COAD	SRSF6	HALLMARK_APICAL_JUNCTION	-0.148229	0.0012543
COAD	SRSF6	HALLMARK_APICAL_SURFACE	-0.218142	1.76e-06
COAD	SRSF6	HALLMARK_APOPTOSIS	-0.1382	0.00264916
COAD	SRSF6	HALLMARK_BILE_ACID_METABOLISM	0.232277	3.44e-07
COAD	SRSF6	HALLMARK_CHOLESTEROL_HOMEOSTASIS	-0.181457	7.48e-05
COAD	SRSF6	HALLMARK_COAGULATION	-0.120874	0.00864087
COAD	SRSF6	HALLMARK_E2F_TARGETS	0.32932	2.24e-13
COAD	SRSF6	HALLMARK_EPITHELIAL_MESENCHYMAL_TRANSITION	-0.135278	0.00326525
COAD	SRSF6	HALLMARK_ESTROGEN_RESPONSE_EARLY	-0.141218	0.00212588
COAD	SRSF6	HALLMARK_ESTROGEN_RESPONSE_LATE	-0.155048	0.000734294
COAD	SRSF6	HALLMARK_G2M_CHECKPOINT	0.382963	6.7e-18
COAD	SRSF6	HALLMARK_HEDGEHOG_SIGNALING	0.152726	0.000883339
COAD	SRSF6	HALLMARK_HEME_METABOLISM	0.140204	0.00229008
COAD	SRSF6	HALLMARK_HYPOXIA	-0.172047	0.000175472
COAD	SRSF6	HALLMARK_IL6_JAK_STAT3_SIGNALING	-0.149536	0.00113387
COAD	SRSF6	HALLMARK_INFLAMMATORY_RESPONSE	-0.12828	0.00530127
COAD	SRSF6	HALLMARK_INTERFERON_ALPHA_RESPONSE	-0.134459	0.00345965
COAD	SRSF6	HALLMARK_INTERFERON_GAMMA_RESPONSE	-0.132162	0.00406295
COAD	SRSF6	HALLMARK_KRAS_SIGNALING_UP	0.0904907	0.0496826
COAD	SRSF6	HALLMARK_MITOTIC_SPINDLE	0.343177	1.83e-14
COAD	SRSF6	HALLMARK_MYOGENESIS	-0.140483	0.00224379
COAD	SRSF6	HALLMARK_NOTCH_SIGNALING	-0.148248	0.00125243
COAD	SRSF6	HALLMARK_P53_PATHWAY	-0.256326	1.67e-08
COAD	SRSF6	HALLMARK_PEROXISOME	0.187988	4.03e-05
COAD	SRSF6	HALLMARK_PI3K_AKT_MTOR_SIGNALING	0.380986	1.02e-17
COAD	SRSF6	HALLMARK_PROTEIN_SECRETION	0.325703	4.22e-13
COAD	SRSF6	HALLMARK_REACTIVE_OXYGEN_SPECIES_PATHWAY	-0.358845	9.25e-16
COAD	SRSF6	HALLMARK_SPERMATOGENESIS	0.109264	0.0176864
COAD	SRSF6	HALLMARK_TNFA_SIGNALING_VIA_NFKB	-0.191588	2.84e-05
COAD	SRSF6	HALLMARK_UV_RESPONSE_DN	0.212679	3.21e-06
COAD	SRSF6	HALLMARK_UV_RESPONSE_UP	-0.0971612	0.0350283
COAD	SRSF7	HALLMARK_ADIPOGENESIS	0.132803	0.00388556
COAD	SRSF7	HALLMARK_ALLOGRAFT_REJECTION	0.092998	0.0436638
COAD	SRSF7	HALLMARK_ANDROGEN_RESPONSE	-0.252607	2.73e-08
COAD	SRSF7	HALLMARK_ANGIOGENESIS	-0.172664	0.000166139
COAD	SRSF7	HALLMARK_APICAL_JUNCTION	-0.348782	6.42e-15
COAD	SRSF7	HALLMARK_APOPTOSIS	-0.135479	0.00321895
COAD	SRSF7	HALLMARK_BILE_ACID_METABOLISM	0.156345	0.000661594
COAD	SRSF7	HALLMARK_DNA_REPAIR	0.384927	4.4e-18
COAD	SRSF7	HALLMARK_E2F_TARGETS	0.556074	1.39e-39
COAD	SRSF7	HALLMARK_EPITHELIAL_MESENCHYMAL_TRANSITION	-0.276444	1.04e-09
COAD	SRSF7	HALLMARK_ESTROGEN_RESPONSE_EARLY	-0.14558	0.00153516
COAD	SRSF7	HALLMARK_ESTROGEN_RESPONSE_LATE	0.196152	1.81e-05
COAD	SRSF7	HALLMARK_FATTY_ACID_METABOLISM	0.267724	3.57e-09
COAD	SRSF7	HALLMARK_G2M_CHECKPOINT	0.423121	7e-22
COAD	SRSF7	HALLMARK_GLYCOLYSIS	0.263168	6.68e-09
COAD	SRSF7	HALLMARK_HEDGEHOG_SIGNALING	-0.246617	5.89e-08
COAD	SRSF7	HALLMARK_HYPOXIA	-0.273253	1.64e-09
COAD	SRSF7	HALLMARK_KRAS_SIGNALING_UP	-0.215441	2.37e-06
COAD	SRSF7	HALLMARK_MTORC1_SIGNALING	0.122716	0.00767035
COAD	SRSF7	HALLMARK_MYC_TARGETS_V1	0.202755	9.22e-06
COAD	SRSF7	HALLMARK_MYC_TARGETS_V2	0.41259	8.74e-21
COAD	SRSF7	HALLMARK_MYOGENESIS	-0.137838	0.00271926
COAD	SRSF7	HALLMARK_NOTCH_SIGNALING	-0.315778	2.3e-12
COAD	SRSF7	HALLMARK_OXIDATIVE_PHOSPHORYLATION	0.271091	2.23e-09
COAD	SRSF7	HALLMARK_PEROXISOME	0.24457	7.64e-08
COAD	SRSF7	HALLMARK_PROTEIN_SECRETION	-0.268872	3.04e-09
COAD	SRSF7	HALLMARK_TGF_BETA_SIGNALING	-0.494947	1.78e-30
COAD	SRSF7	HALLMARK_TNFA_SIGNALING_VIA_NFKB	-0.151825	0.0009484
COAD	SRSF7	HALLMARK_UV_RESPONSE_DN	-0.38444	4.88e-18
COAD	SRSF7	HALLMARK_UV_RESPONSE_UP	0.244369	7.83e-08
COAD	SRSF7	HALLMARK_XENOBIOTIC_METABOLISM	0.144632	0.00164897
COAD	SRSF8	HALLMARK_ADIPOGENESIS	0.175044	0.000134363
COAD	SRSF8	HALLMARK_ANDROGEN_RESPONSE	0.200867	1.12e-05
COAD	SRSF8	HALLMARK_ANGIOGENESIS	-0.168047	0.000248848
COAD	SRSF8	HALLMARK_APICAL_JUNCTION	-0.130233	0.00464125
COAD	SRSF8	HALLMARK_CHOLESTEROL_HOMEOSTASIS	0.115226	0.0123354
COAD	SRSF8	HALLMARK_DNA_REPAIR	0.187466	4.24e-05
COAD	SRSF8	HALLMARK_E2F_TARGETS	0.124078	0.00701601
COAD	SRSF8	HALLMARK_EPITHELIAL_MESENCHYMAL_TRANSITION	-0.0945166	0.0403262
COAD	SRSF8	HALLMARK_ESTROGEN_RESPONSE_LATE	0.111068	0.0158861
COAD	SRSF8	HALLMARK_FATTY_ACID_METABOLISM	0.186043	4.86e-05
COAD	SRSF8	HALLMARK_HYPOXIA	-0.221875	1.16e-06
COAD	SRSF8	HALLMARK_IL6_JAK_STAT3_SIGNALING	-0.168308	0.000243295
COAD	SRSF8	HALLMARK_INFLAMMATORY_RESPONSE	-0.16696	0.000273263
COAD	SRSF8	HALLMARK_INTERFERON_GAMMA_RESPONSE	-0.155446	0.00071124
COAD	SRSF8	HALLMARK_MTORC1_SIGNALING	0.153169	0.000852925
COAD	SRSF8	HALLMARK_MYC_TARGETS_V2	0.130247	0.00463654
COAD	SRSF8	HALLMARK_OXIDATIVE_PHOSPHORYLATION	0.216864	2.03e-06
COAD	SRSF8	HALLMARK_PEROXISOME	0.132298	0.00402469
COAD	SRSF8	HALLMARK_PI3K_AKT_MTOR_SIGNALING	0.115984	0.0117702
COAD	SRSF8	HALLMARK_PROTEIN_SECRETION	0.325918	4.06e-13
COAD	SRSF8	HALLMARK_TNFA_SIGNALING_VIA_NFKB	-0.246576	5.93e-08
COAD	SRSF8	HALLMARK_UNFOLDED_PROTEIN_RESPONSE	0.0935245	0.0424814
COAD	SRSF9	HALLMARK_ADIPOGENESIS	0.1775	0.000107606
COAD	SRSF9	HALLMARK_ANDROGEN_RESPONSE	-0.604742	2.62e-48
COAD	SRSF9	HALLMARK_ANGIOGENESIS	-0.238231	1.68e-07
COAD	SRSF9	HALLMARK_APICAL_SURFACE	0.118195	0.0102489
COAD	SRSF9	HALLMARK_APOPTOSIS	-0.0984649	0.0326424
COAD	SRSF9	HALLMARK_CHOLESTEROL_HOMEOSTASIS	0.321454	8.78e-13
COAD	SRSF9	HALLMARK_COAGULATION	0.239303	1.47e-07
COAD	SRSF9	HALLMARK_COMPLEMENT	-0.177768	0.00010502
COAD	SRSF9	HALLMARK_DNA_REPAIR	0.555651	1.64e-39
COAD	SRSF9	HALLMARK_E2F_TARGETS	0.222331	1.1e-06
COAD	SRSF9	HALLMARK_EPITHELIAL_MESENCHYMAL_TRANSITION	-0.202316	9.65e-06
COAD	SRSF9	HALLMARK_ESTROGEN_RESPONSE_EARLY	0.132223	0.00404573
COAD	SRSF9	HALLMARK_ESTROGEN_RESPONSE_LATE	0.457149	1.06e-25
COAD	SRSF9	HALLMARK_FATTY_ACID_METABOLISM	0.273213	1.65e-09
COAD	SRSF9	HALLMARK_GLYCOLYSIS	0.35604	1.6e-15
COAD	SRSF9	HALLMARK_HEDGEHOG_SIGNALING	-0.281774	4.8e-10
COAD	SRSF9	HALLMARK_HYPOXIA	-0.118157	0.0102733
COAD	SRSF9	HALLMARK_IL2_STAT5_SIGNALING	-0.186857	4.49e-05
COAD	SRSF9	HALLMARK_INFLAMMATORY_RESPONSE	-0.188535	3.82e-05
COAD	SRSF9	HALLMARK_KRAS_SIGNALING_UP	-0.442562	5.21e-24
COAD	SRSF9	HALLMARK_MITOTIC_SPINDLE	-0.303964	1.59e-11
COAD	SRSF9	HALLMARK_MYC_TARGETS_V1	0.275915	1.12e-09
COAD	SRSF9	HALLMARK_MYC_TARGETS_V2	0.572051	2.75e-42
COAD	SRSF9	HALLMARK_OXIDATIVE_PHOSPHORYLATION	0.474771	7.49e-28
COAD	SRSF9	HALLMARK_P53_PATHWAY	0.381323	9.49e-18
COAD	SRSF9	HALLMARK_PEROXISOME	0.201826	1.01e-05
COAD	SRSF9	HALLMARK_PI3K_AKT_MTOR_SIGNALING	-0.314801	2.7e-12
COAD	SRSF9	HALLMARK_PROTEIN_SECRETION	-0.617813	6.47e-51
COAD	SRSF9	HALLMARK_REACTIVE_OXYGEN_SPECIES_PATHWAY	0.511443	9.39e-33
COAD	SRSF9	HALLMARK_TGF_BETA_SIGNALING	-0.466426	8.11e-27
COAD	SRSF9	HALLMARK_TNFA_SIGNALING_VIA_NFKB	-0.122002	0.00803438
COAD	SRSF9	HALLMARK_UNFOLDED_PROTEIN_RESPONSE	0.150558	0.0010473
COAD	SRSF9	HALLMARK_UV_RESPONSE_DN	-0.688462	2.01e-67
COAD	SRSF9	HALLMARK_UV_RESPONSE_UP	0.504291	9.46e-32
COAD	SRSF9	HALLMARK_WNT_BETA_CATENIN_SIGNALING	0.202884	9.09e-06
COAD	SRSF9	HALLMARK_XENOBIOTIC_METABOLISM	0.221312	1.23e-06
DLBC	SRSF1	HALLMARK_ADIPOGENESIS	-0.284571	0.0499566
DLBC	SRSF1	HALLMARK_APOPTOSIS	-0.416716	0.00321598
DLBC	SRSF1	HALLMARK_BILE_ACID_METABOLISM	0.337637	0.0189283
DLBC	SRSF1	HALLMARK_COMPLEMENT	-0.304381	0.0354288
DLBC	SRSF1	HALLMARK_DNA_REPAIR	-0.325513	0.0239676
DLBC	SRSF1	HALLMARK_E2F_TARGETS	0.647702	6.49e-07
DLBC	SRSF1	HALLMARK_ESTROGEN_RESPONSE_LATE	-0.289759	0.0457515
DLBC	SRSF1	HALLMARK_G2M_CHECKPOINT	0.765042	2.43e-10
DLBC	SRSF1	HALLMARK_HEDGEHOG_SIGNALING	0.29402	0.0425181
DLBC	SRSF1	HALLMARK_MITOTIC_SPINDLE	0.741488	1.66e-09
DLBC	SRSF1	HALLMARK_OXIDATIVE_PHOSPHORYLATION	-0.595123	8.15e-06
DLBC	SRSF1	HALLMARK_P53_PATHWAY	-0.433895	0.00206276
DLBC	SRSF1	HALLMARK_REACTIVE_OXYGEN_SPECIES_PATHWAY	-0.697507	3.61e-08
DLBC	SRSF1	HALLMARK_TGF_BETA_SIGNALING	0.468899	0.000774899
DLBC	SRSF1	HALLMARK_UV_RESPONSE_DN	0.315993	0.028673
DLBC	SRSF1	HALLMARK_XENOBIOTIC_METABOLISM	-0.387589	0.00649271
DLBC	SRSF10	HALLMARK_ADIPOGENESIS	-0.467252	0.000813337
DLBC	SRSF10	HALLMARK_APOPTOSIS	-0.336883	0.0192131
DLBC	SRSF10	HALLMARK_BILE_ACID_METABOLISM	0.303573	0.0359444
DLBC	SRSF10	HALLMARK_DNA_REPAIR	-0.580134	1.55e-05
DLBC	SRSF10	HALLMARK_E2F_TARGETS	0.558431	3.71e-05
DLBC	SRSF10	HALLMARK_FATTY_ACID_METABOLISM	-0.368312	0.010003
DLBC	SRSF10	HALLMARK_G2M_CHECKPOINT	0.597886	7.21e-06
DLBC	SRSF10	HALLMARK_HEDGEHOG_SIGNALING	0.454277	0.00118122
DLBC	SRSF10	HALLMARK_IL6_JAK_STAT3_SIGNALING	0.308264	0.0330374
DLBC	SRSF10	HALLMARK_KRAS_SIGNALING_UP	0.3854	0.0068279
DLBC	SRSF10	HALLMARK_MITOTIC_SPINDLE	0.650361	5.64e-07
DLBC	SRSF10	HALLMARK_OXIDATIVE_PHOSPHORYLATION	-0.586811	1.17e-05
DLBC	SRSF10	HALLMARK_P53_PATHWAY	-0.462012	0.0009473
DLBC	SRSF10	HALLMARK_PEROXISOME	-0.299509	0.0386303
DLBC	SRSF10	HALLMARK_REACTIVE_OXYGEN_SPECIES_PATHWAY	-0.530796	0.000103992
DLBC	SRSF10	HALLMARK_TGF_BETA_SIGNALING	0.513941	0.000186742
DLBC	SRSF10	HALLMARK_UV_RESPONSE_DN	0.507369	0.000232711
DLBC	SRSF10	HALLMARK_UV_RESPONSE_UP	-0.51618	0.00017307
DLBC	SRSF10	HALLMARK_XENOBIOTIC_METABOLISM	-0.369131	0.00982599
DLBC	SRSF11	HALLMARK_ADIPOGENESIS	-0.505284	0.000249309
DLBC	SRSF11	HALLMARK_APOPTOSIS	-0.377702	0.00812941
DLBC	SRSF11	HALLMARK_CHOLESTEROL_HOMEOSTASIS	-0.354883	0.0133221
DLBC	SRSF11	HALLMARK_DNA_REPAIR	-0.568093	2.54e-05
DLBC	SRSF11	HALLMARK_E2F_TARGETS	0.377793	0.00811284
DLBC	SRSF11	HALLMARK_FATTY_ACID_METABOLISM	-0.288059	0.0470967
DLBC	SRSF11	HALLMARK_G2M_CHECKPOINT	0.464343	0.000885438
DLBC	SRSF11	HALLMARK_HEDGEHOG_SIGNALING	0.352052	0.0141309
DLBC	SRSF11	HALLMARK_IL6_JAK_STAT3_SIGNALING	0.333572	0.0205073
DLBC	SRSF11	HALLMARK_KRAS_SIGNALING_UP	0.399026	0.00496351
DLBC	SRSF11	HALLMARK_MITOTIC_SPINDLE	0.586174	1.2e-05
DLBC	SRSF11	HALLMARK_OXIDATIVE_PHOSPHORYLATION	-0.533024	9.6e-05
DLBC	SRSF11	HALLMARK_P53_PATHWAY	-0.439443	0.0017783
DLBC	SRSF11	HALLMARK_REACTIVE_OXYGEN_SPECIES_PATHWAY	-0.370412	0.00955444
DLBC	SRSF11	HALLMARK_TGF_BETA_SIGNALING	0.544115	6.4e-05
DLBC	SRSF11	HALLMARK_UV_RESPONSE_DN	0.50289	0.000269683
DLBC	SRSF11	HALLMARK_UV_RESPONSE_UP	-0.47876	0.000576906
DLBC	SRSF11	HALLMARK_XENOBIOTIC_METABOLISM	-0.37878	0.0079352
DLBC	SRSF12	HALLMARK_BILE_ACID_METABOLISM	-0.290121	0.0454694
DLBC	SRSF12	HALLMARK_GLYCOLYSIS	-0.29098	0.0448051
DLBC	SRSF12	HALLMARK_KRAS_SIGNALING_DN	0.340525	0.0178701
DLBC	SRSF12	HALLMARK_MITOTIC_SPINDLE	-0.316001	0.0286686
DLBC	SRSF12	HALLMARK_PANCREAS_BETA_CELLS	-0.340525	0.0178701
DLBC	SRSF2	HALLMARK_APICAL_SURFACE	-0.397581	0.00513745
DLBC	SRSF2	HALLMARK_APOPTOSIS	-0.306166	0.0343122
DLBC	SRSF2	HALLMARK_COMPLEMENT	-0.394472	0.00552987
DLBC	SRSF2	HALLMARK_E2F_TARGETS	0.621973	2.37e-06
DLBC	SRSF2	HALLMARK_G2M_CHECKPOINT	0.646377	6.96e-07
DLBC	SRSF2	HALLMARK_INTERFERON_ALPHA_RESPONSE	-0.367061	0.0102788
DLBC	SRSF2	HALLMARK_INTERFERON_GAMMA_RESPONSE	-0.301669	0.0371826
DLBC	SRSF2	HALLMARK_MITOTIC_SPINDLE	0.405955	0.00419914
DLBC	SRSF2	HALLMARK_MYC_TARGETS_V2	0.446529	0.00146595
DLBC	SRSF2	HALLMARK_OXIDATIVE_PHOSPHORYLATION	-0.437593	0.00186901
DLBC	SRSF2	HALLMARK_REACTIVE_OXYGEN_SPECIES_PATHWAY	-0.432558	0.00213705
DLBC	SRSF2	HALLMARK_XENOBIOTIC_METABOLISM	-0.293675	0.0427729
DLBC	SRSF3	HALLMARK_ADIPOGENESIS	0.351169	0.0143915
DLBC	SRSF3	HALLMARK_ANDROGEN_RESPONSE	0.323974	0.024681
DLBC	SRSF3	HALLMARK_APICAL_SURFACE	-0.505403	0.000248328
DLBC	SRSF3	HALLMARK_CHOLESTEROL_HOMEOSTASIS	0.30846	0.0329202
DLBC	SRSF3	HALLMARK_COMPLEMENT	-0.441237	0.00169412
DLBC	SRSF3	HALLMARK_E2F_TARGETS	0.637516	1.1e-06
DLBC	SRSF3	HALLMARK_FATTY_ACID_METABOLISM	0.317251	0.02801
DLBC	SRSF3	HALLMARK_G2M_CHECKPOINT	0.501237	0.000284619
DLBC	SRSF3	HALLMARK_GLYCOLYSIS	0.422614	0.00276831
DLBC	SRSF3	HALLMARK_IL2_STAT5_SIGNALING	-0.395291	0.00542398
DLBC	SRSF3	HALLMARK_INTERFERON_ALPHA_RESPONSE	-0.537517	8.16e-05
DLBC	SRSF3	HALLMARK_INTERFERON_GAMMA_RESPONSE	-0.545834	6.01e-05
DLBC	SRSF3	HALLMARK_KRAS_SIGNALING_DN	-0.396726	0.00524293
DLBC	SRSF3	HALLMARK_MYC_TARGETS_V2	0.487577	0.000439788
DLBC	SRSF3	HALLMARK_NOTCH_SIGNALING	-0.386644	0.00663554
DLBC	SRSF3	HALLMARK_PANCREAS_BETA_CELLS	0.396726	0.00524293
DLBC	SRSF3	HALLMARK_PI3K_AKT_MTOR_SIGNALING	0.407249	0.00406844
DLBC	SRSF3	HALLMARK_REACTIVE_OXYGEN_SPECIES_PATHWAY	-0.34795	0.0153767
DLBC	SRSF3	HALLMARK_UV_RESPONSE_UP	0.405475	0.00424854
DLBC	SRSF3	HALLMARK_WNT_BETA_CATENIN_SIGNALING	-0.30047	0.0379806
DLBC	SRSF4	HALLMARK_ADIPOGENESIS	-0.60191	6.03e-06
DLBC	SRSF4	HALLMARK_BILE_ACID_METABOLISM	0.364848	0.0107826
DLBC	SRSF4	HALLMARK_DNA_REPAIR	-0.59316	8.88e-06
DLBC	SRSF4	HALLMARK_E2F_TARGETS	0.444612	0.00154524
DLBC	SRSF4	HALLMARK_FATTY_ACID_METABOLISM	-0.448694	0.00138082
DLBC	SRSF4	HALLMARK_G2M_CHECKPOINT	0.441548	0.00167988
DLBC	SRSF4	HALLMARK_HEDGEHOG_SIGNALING	0.327228	0.0231928
DLBC	SRSF4	HALLMARK_IL6_JAK_STAT3_SIGNALING	0.419077	0.00302963
DLBC	SRSF4	HALLMARK_KRAS_SIGNALING_UP	0.418567	0.00306905
DLBC	SRSF4	HALLMARK_MITOTIC_SPINDLE	0.592706	9.06e-06
DLBC	SRSF4	HALLMARK_OXIDATIVE_PHOSPHORYLATION	-0.495804	0.000339132
DLBC	SRSF4	HALLMARK_P53_PATHWAY	-0.443791	0.00158033
DLBC	SRSF4	HALLMARK_PEROXISOME	-0.301736	0.0371388
DLBC	SRSF4	HALLMARK_REACTIVE_OXYGEN_SPECIES_PATHWAY	-0.500046	0.000295841
DLBC	SRSF4	HALLMARK_TGF_BETA_SIGNALING	0.387788	0.00646287
DLBC	SRSF4	HALLMARK_UV_RESPONSE_DN	0.412104	0.00360928
DLBC	SRSF4	HALLMARK_UV_RESPONSE_UP	-0.621099	2.47e-06
DLBC	SRSF4	HALLMARK_XENOBIOTIC_METABOLISM	-0.324114	0.0246155
DLBC	SRSF5	HALLMARK_ADIPOGENESIS	-0.349414	0.0149218
DLBC	SRSF5	HALLMARK_ALLOGRAFT_REJECTION	0.326872	0.0233521
DLBC	SRSF5	HALLMARK_APOPTOSIS	-0.358631	0.0123127
DLBC	SRSF5	HALLMARK_BILE_ACID_METABOLISM	0.335355	0.0198015
DLBC	SRSF5	HALLMARK_CHOLESTEROL_HOMEOSTASIS	-0.423688	0.002693
DLBC	SRSF5	HALLMARK_GLYCOLYSIS	-0.400087	0.00483915
DLBC	SRSF5	HALLMARK_HYPOXIA	-0.525161	0.00012691
DLBC	SRSF5	HALLMARK_MITOTIC_SPINDLE	0.422578	0.00277088
DLBC	SRSF5	HALLMARK_TGF_BETA_SIGNALING	0.343696	0.0167663
DLBC	SRSF5	HALLMARK_UV_RESPONSE_DN	0.401212	0.00471025
DLBC	SRSF5	HALLMARK_WNT_BETA_CATENIN_SIGNALING	0.438651	0.00181665
DLBC	SRSF6	HALLMARK_ADIPOGENESIS	-0.440164	0.00174402
DLBC	SRSF6	HALLMARK_APOPTOSIS	-0.457232	0.00108636
DLBC	SRSF6	HALLMARK_BILE_ACID_METABOLISM	0.287952	0.0471824
DLBC	SRSF6	HALLMARK_CHOLESTEROL_HOMEOSTASIS	-0.312336	0.0306737
DLBC	SRSF6	HALLMARK_DNA_REPAIR	-0.431257	0.00221164
DLBC	SRSF6	HALLMARK_E2F_TARGETS	0.405147	0.00428255
DLBC	SRSF6	HALLMARK_ESTROGEN_RESPONSE_LATE	-0.296424	0.0407778
DLBC	SRSF6	HALLMARK_G2M_CHECKPOINT	0.571981	2.17e-05
DLBC	SRSF6	HALLMARK_HYPOXIA	-0.311513	0.0311396
DLBC	SRSF6	HALLMARK_MITOTIC_SPINDLE	0.608454	4.48e-06
DLBC	SRSF6	HALLMARK_OXIDATIVE_PHOSPHORYLATION	-0.550028	5.13e-05
DLBC	SRSF6	HALLMARK_P53_PATHWAY	-0.411762	0.00364005
DLBC	SRSF6	HALLMARK_REACTIVE_OXYGEN_SPECIES_PATHWAY	-0.405873	0.00420752
DLBC	SRSF6	HALLMARK_TGF_BETA_SIGNALING	0.588174	1.1e-05
DLBC	SRSF6	HALLMARK_UV_RESPONSE_DN	0.353222	0.0137917
DLBC	SRSF6	HALLMARK_UV_RESPONSE_UP	-0.353451	0.0137261
DLBC	SRSF6	HALLMARK_WNT_BETA_CATENIN_SIGNALING	0.305577	0.0346773
DLBC	SRSF6	HALLMARK_XENOBIOTIC_METABOLISM	-0.379106	0.00787725
DLBC	SRSF7	HALLMARK_APICAL_SURFACE	-0.29846	0.0393501
DLBC	SRSF7	HALLMARK_APOPTOSIS	-0.327375	0.0231275
DLBC	SRSF7	HALLMARK_COMPLEMENT	-0.344078	0.0166372
DLBC	SRSF7	HALLMARK_E2F_TARGETS	0.663218	2.8e-07
DLBC	SRSF7	HALLMARK_G2M_CHECKPOINT	0.586274	1.19e-05
DLBC	SRSF7	HALLMARK_HYPOXIA	-0.332783	0.0208262
DLBC	SRSF7	HALLMARK_MITOTIC_SPINDLE	0.473662	0.00067271
DLBC	SRSF7	HALLMARK_MYC_TARGETS_V2	0.324565	0.0244051
DLBC	SRSF7	HALLMARK_OXIDATIVE_PHOSPHORYLATION	-0.390479	0.0060719
DLBC	SRSF7	HALLMARK_REACTIVE_OXYGEN_SPECIES_PATHWAY	-0.508806	0.000221858
DLBC	SRSF8	HALLMARK_P53_PATHWAY	-0.286154	0.0486415
DLBC	SRSF8	HALLMARK_PROTEIN_SECRETION	0.436666	0.00191603
DLBC	SRSF8	HALLMARK_TGF_BETA_SIGNALING	0.407748	0.00401896
DLBC	SRSF8	HALLMARK_XENOBIOTIC_METABOLISM	-0.450614	0.001309
DLBC	SRSF9	HALLMARK_ADIPOGENESIS	-0.29939	0.0387115
DLBC	SRSF9	HALLMARK_DNA_REPAIR	-0.380422	0.00764703
DLBC	SRSF9	HALLMARK_E2F_TARGETS	0.563674	3.02e-05
DLBC	SRSF9	HALLMARK_G2M_CHECKPOINT	0.560809	3.38e-05
DLBC	SRSF9	HALLMARK_MITOTIC_SPINDLE	0.545252	6.14e-05
DLBC	SRSF9	HALLMARK_OXIDATIVE_PHOSPHORYLATION	-0.391369	0.00594723
DLBC	SRSF9	HALLMARK_REACTIVE_OXYGEN_SPECIES_PATHWAY	-0.550916	4.96e-05
DLBC	SRSF9	HALLMARK_UV_RESPONSE_DN	0.326641	0.0234554
DLBC	SRSF9	HALLMARK_UV_RESPONSE_UP	-0.43286	0.00212006
ESCA	SRSF1	HALLMARK_ALLOGRAFT_REJECTION	-0.161111	0.0405476
ESCA	SRSF1	HALLMARK_APICAL_JUNCTION	-0.23362	0.00277166
ESCA	SRSF1	HALLMARK_APOPTOSIS	-0.459308	7.86e-10
ESCA	SRSF1	HALLMARK_BILE_ACID_METABOLISM	0.223703	0.00421533
ESCA	SRSF1	HALLMARK_COAGULATION	0.225285	0.00394709
ESCA	SRSF1	HALLMARK_DNA_REPAIR	0.357582	2.99e-06
ESCA	SRSF1	HALLMARK_E2F_TARGETS	0.693873	1.37e-24
ESCA	SRSF1	HALLMARK_EPITHELIAL_MESENCHYMAL_TRANSITION	-0.222235	0.00447873
ESCA	SRSF1	HALLMARK_ESTROGEN_RESPONSE_EARLY	-0.165342	0.0354953
ESCA	SRSF1	HALLMARK_FATTY_ACID_METABOLISM	0.281913	0.000278648
ESCA	SRSF1	HALLMARK_G2M_CHECKPOINT	0.645429	1.84e-20
ESCA	SRSF1	HALLMARK_GLYCOLYSIS	0.352371	4.25e-06
ESCA	SRSF1	HALLMARK_HEME_METABOLISM	0.169614	0.0309457
ESCA	SRSF1	HALLMARK_HYPOXIA	-0.245685	0.0016255
ESCA	SRSF1	HALLMARK_IL2_STAT5_SIGNALING	-0.203702	0.00932392
ESCA	SRSF1	HALLMARK_INFLAMMATORY_RESPONSE	-0.202085	0.00991256
ESCA	SRSF1	HALLMARK_INTERFERON_ALPHA_RESPONSE	-0.191407	0.0146893
ESCA	SRSF1	HALLMARK_INTERFERON_GAMMA_RESPONSE	-0.228038	0.00351686
ESCA	SRSF1	HALLMARK_KRAS_SIGNALING_DN	-0.344483	7.16e-06
ESCA	SRSF1	HALLMARK_KRAS_SIGNALING_UP	-0.21133	0.006944
ESCA	SRSF1	HALLMARK_MITOTIC_SPINDLE	0.422544	2.13e-08
ESCA	SRSF1	HALLMARK_MYC_TARGETS_V2	0.453133	1.41e-09
ESCA	SRSF1	HALLMARK_MYOGENESIS	-0.226462	0.00375764
ESCA	SRSF1	HALLMARK_P53_PATHWAY	-0.372201	1.08e-06
ESCA	SRSF1	HALLMARK_PEROXISOME	0.425799	1.62e-08
ESCA	SRSF1	HALLMARK_PROTEIN_SECRETION	-0.259361	0.000859819
ESCA	SRSF1	HALLMARK_REACTIVE_OXYGEN_SPECIES_PATHWAY	-0.251364	0.00125301
ESCA	SRSF1	HALLMARK_SPERMATOGENESIS	0.383432	4.75e-07
ESCA	SRSF1	HALLMARK_TGF_BETA_SIGNALING	-0.383942	4.57e-07
ESCA	SRSF1	HALLMARK_TNFA_SIGNALING_VIA_NFKB	-0.33643	1.2e-05
ESCA	SRSF1	HALLMARK_UV_RESPONSE_DN	-0.160874	0.0408471
ESCA	SRSF1	HALLMARK_UV_RESPONSE_UP	0.20149	0.0101371
ESCA	SRSF1	HALLMARK_XENOBIOTIC_METABOLISM	0.181467	0.0208308
ESCA	SRSF10	HALLMARK_ADIPOGENESIS	-0.184088	0.0190276
ESCA	SRSF10	HALLMARK_ANGIOGENESIS	0.237365	0.0023552
ESCA	SRSF10	HALLMARK_APICAL_JUNCTION	-0.256925	0.000965518
ESCA	SRSF10	HALLMARK_APICAL_SURFACE	-0.241362	0.00197397
ESCA	SRSF10	HALLMARK_APOPTOSIS	-0.31212	5.27e-05
ESCA	SRSF10	HALLMARK_BILE_ACID_METABOLISM	0.240957	0.00200984
ESCA	SRSF10	HALLMARK_COAGULATION	0.27579	0.000382037
ESCA	SRSF10	HALLMARK_E2F_TARGETS	0.425868	1.61e-08
ESCA	SRSF10	HALLMARK_ESTROGEN_RESPONSE_EARLY	-0.249881	0.00134191
ESCA	SRSF10	HALLMARK_G2M_CHECKPOINT	0.399315	1.41e-07
ESCA	SRSF10	HALLMARK_HYPOXIA	-0.242637	0.00186467
ESCA	SRSF10	HALLMARK_INFLAMMATORY_RESPONSE	-0.17272	0.0279568
ESCA	SRSF10	HALLMARK_KRAS_SIGNALING_DN	-0.454456	1.24e-09
ESCA	SRSF10	HALLMARK_MITOTIC_SPINDLE	0.421501	2.33e-08
ESCA	SRSF10	HALLMARK_MTORC1_SIGNALING	-0.184879	0.0185104
ESCA	SRSF10	HALLMARK_MYOGENESIS	-0.197822	0.0116242
ESCA	SRSF10	HALLMARK_NOTCH_SIGNALING	0.171324	0.0292684
ESCA	SRSF10	HALLMARK_OXIDATIVE_PHOSPHORYLATION	-0.168621	0.0319565
ESCA	SRSF10	HALLMARK_P53_PATHWAY	-0.486685	5.15e-11
ESCA	SRSF10	HALLMARK_PANCREAS_BETA_CELLS	0.233699	0.0027622
ESCA	SRSF10	HALLMARK_PEROXISOME	0.265115	0.000650925
ESCA	SRSF10	HALLMARK_REACTIVE_OXYGEN_SPECIES_PATHWAY	-0.380852	5.74e-07
ESCA	SRSF10	HALLMARK_SPERMATOGENESIS	0.195532	0.0126467
ESCA	SRSF10	HALLMARK_TNFA_SIGNALING_VIA_NFKB	-0.201567	0.0101077
ESCA	SRSF10	HALLMARK_UNFOLDED_PROTEIN_RESPONSE	-0.292553	0.000158253
ESCA	SRSF11	HALLMARK_ADIPOGENESIS	-0.179105	0.0225805
ESCA	SRSF11	HALLMARK_ANGIOGENESIS	0.228251	0.00348539
ESCA	SRSF11	HALLMARK_APICAL_JUNCTION	-0.213516	0.00636989
ESCA	SRSF11	HALLMARK_APICAL_SURFACE	-0.212444	0.0066459
ESCA	SRSF11	HALLMARK_COAGULATION	0.18741	0.0169371
ESCA	SRSF11	HALLMARK_ESTROGEN_RESPONSE_EARLY	-0.194946	0.0129209
ESCA	SRSF11	HALLMARK_KRAS_SIGNALING_DN	-0.287705	0.000205351
ESCA	SRSF11	HALLMARK_MITOTIC_SPINDLE	0.254426	0.00108625
ESCA	SRSF11	HALLMARK_MTORC1_SIGNALING	-0.217499	0.00543197
ESCA	SRSF11	HALLMARK_MYC_TARGETS_V2	-0.179063	0.0226128
ESCA	SRSF11	HALLMARK_OXIDATIVE_PHOSPHORYLATION	-0.192992	0.0138727
ESCA	SRSF11	HALLMARK_P53_PATHWAY	-0.347946	5.71e-06
ESCA	SRSF11	HALLMARK_PANCREAS_BETA_CELLS	0.204463	0.0090578
ESCA	SRSF11	HALLMARK_PROTEIN_SECRETION	0.165173	0.0356864
ESCA	SRSF11	HALLMARK_REACTIVE_OXYGEN_SPECIES_PATHWAY	-0.335833	1.25e-05
ESCA	SRSF11	HALLMARK_UNFOLDED_PROTEIN_RESPONSE	-0.182515	0.020093
ESCA	SRSF12	HALLMARK_ADIPOGENESIS	-0.193304	0.0137169
ESCA	SRSF12	HALLMARK_APICAL_JUNCTION	0.263475	0.000705114
ESCA	SRSF12	HALLMARK_APICAL_SURFACE	0.26607	0.000621171
ESCA	SRSF12	HALLMARK_BILE_ACID_METABOLISM	-0.154432	0.0497436
ESCA	SRSF12	HALLMARK_COMPLEMENT	-0.16528	0.0355658
ESCA	SRSF12	HALLMARK_E2F_TARGETS	0.180558	0.02149
ESCA	SRSF12	HALLMARK_EPITHELIAL_MESENCHYMAL_TRANSITION	0.303552	8.61e-05
ESCA	SRSF12	HALLMARK_ESTROGEN_RESPONSE_EARLY	-0.300561	0.000101849
ESCA	SRSF12	HALLMARK_ESTROGEN_RESPONSE_LATE	-0.29335	0.000151545
ESCA	SRSF12	HALLMARK_FATTY_ACID_METABOLISM	-0.284843	0.000238977
ESCA	SRSF12	HALLMARK_G2M_CHECKPOINT	0.1707	0.0298713
ESCA	SRSF12	HALLMARK_HEDGEHOG_SIGNALING	0.413716	4.45e-08
ESCA	SRSF12	HALLMARK_HYPOXIA	0.32972	1.83e-05
ESCA	SRSF12	HALLMARK_INTERFERON_ALPHA_RESPONSE	-0.275225	0.000393177
ESCA	SRSF12	HALLMARK_INTERFERON_GAMMA_RESPONSE	-0.179056	0.0226187
ESCA	SRSF12	HALLMARK_MYOGENESIS	0.263368	0.000708803
ESCA	SRSF12	HALLMARK_OXIDATIVE_PHOSPHORYLATION	-0.25099	0.00127491
ESCA	SRSF12	HALLMARK_PROTEIN_SECRETION	-0.156067	0.0473458
ESCA	SRSF12	HALLMARK_SPERMATOGENESIS	0.215252	0.00594463
ESCA	SRSF12	HALLMARK_UV_RESPONSE_UP	0.197116	0.0119313
ESCA	SRSF12	HALLMARK_WNT_BETA_CATENIN_SIGNALING	0.338854	1.03e-05
ESCA	SRSF12	HALLMARK_XENOBIOTIC_METABOLISM	-0.209648	0.00741654
ESCA	SRSF2	HALLMARK_ADIPOGENESIS	-0.194565	0.0131018
ESCA	SRSF2	HALLMARK_ANDROGEN_RESPONSE	-0.18157	0.0207574
ESCA	SRSF2	HALLMARK_APICAL_JUNCTION	-0.197358	0.0118252
ESCA	SRSF2	HALLMARK_APOPTOSIS	-0.223947	0.0041729
ESCA	SRSF2	HALLMARK_DNA_REPAIR	0.406284	8.13e-08
ESCA	SRSF2	HALLMARK_E2F_TARGETS	0.442782	3.64e-09
ESCA	SRSF2	HALLMARK_EPITHELIAL_MESENCHYMAL_TRANSITION	-0.157196	0.0457465
ESCA	SRSF2	HALLMARK_ESTROGEN_RESPONSE_EARLY	-0.237685	0.00232235
ESCA	SRSF2	HALLMARK_G2M_CHECKPOINT	0.345914	6.52e-06
ESCA	SRSF2	HALLMARK_GLYCOLYSIS	0.200254	0.0106185
ESCA	SRSF2	HALLMARK_KRAS_SIGNALING_UP	-0.189464	0.015747
ESCA	SRSF2	HALLMARK_MYC_TARGETS_V2	0.293594	0.000149547
ESCA	SRSF2	HALLMARK_MYOGENESIS	-0.155222	0.0485719
ESCA	SRSF2	HALLMARK_NOTCH_SIGNALING	-0.209836	0.00736222
ESCA	SRSF2	HALLMARK_PEROXISOME	0.322292	2.88e-05
ESCA	SRSF2	HALLMARK_PI3K_AKT_MTOR_SIGNALING	0.171631	0.0289752
ESCA	SRSF2	HALLMARK_PROTEIN_SECRETION	-0.425899	1.6e-08
ESCA	SRSF2	HALLMARK_SPERMATOGENESIS	0.180798	0.0213143
ESCA	SRSF2	HALLMARK_TGF_BETA_SIGNALING	-0.365273	1.76e-06
ESCA	SRSF2	HALLMARK_UV_RESPONSE_DN	-0.330572	1.74e-05
ESCA	SRSF2	HALLMARK_UV_RESPONSE_UP	0.168858	0.0317124
ESCA	SRSF3	HALLMARK_APICAL_JUNCTION	-0.227558	0.00358879
ESCA	SRSF3	HALLMARK_APOPTOSIS	-0.32463	2.5e-05
ESCA	SRSF3	HALLMARK_BILE_ACID_METABOLISM	0.200047	0.010701
ESCA	SRSF3	HALLMARK_COAGULATION	0.243743	0.00177447
ESCA	SRSF3	HALLMARK_DNA_REPAIR	0.335952	1.24e-05
ESCA	SRSF3	HALLMARK_E2F_TARGETS	0.582474	4.27e-16
ESCA	SRSF3	HALLMARK_EPITHELIAL_MESENCHYMAL_TRANSITION	-0.157391	0.045475
ESCA	SRSF3	HALLMARK_ESTROGEN_RESPONSE_EARLY	-0.244685	0.00170068
ESCA	SRSF3	HALLMARK_FATTY_ACID_METABOLISM	0.228032	0.00351771
ESCA	SRSF3	HALLMARK_G2M_CHECKPOINT	0.51971	1.37e-12
ESCA	SRSF3	HALLMARK_GLYCOLYSIS	0.260703	0.000806216
ESCA	SRSF3	HALLMARK_INFLAMMATORY_RESPONSE	-0.185767	0.0179444
ESCA	SRSF3	HALLMARK_INTERFERON_ALPHA_RESPONSE	-0.190107	0.0153898
ESCA	SRSF3	HALLMARK_INTERFERON_GAMMA_RESPONSE	-0.219359	0.00503787
ESCA	SRSF3	HALLMARK_KRAS_SIGNALING_DN	-0.27916	0.000321407
ESCA	SRSF3	HALLMARK_MITOTIC_SPINDLE	0.224631	0.00405618
ESCA	SRSF3	HALLMARK_MYC_TARGETS_V2	0.371701	1.12e-06
ESCA	SRSF3	HALLMARK_NOTCH_SIGNALING	-0.158849	0.0434872
ESCA	SRSF3	HALLMARK_P53_PATHWAY	-0.289479	0.000186782
ESCA	SRSF3	HALLMARK_PEROXISOME	0.37845	6.85e-07
ESCA	SRSF3	HALLMARK_PROTEIN_SECRETION	-0.288079	0.000201302
ESCA	SRSF3	HALLMARK_REACTIVE_OXYGEN_SPECIES_PATHWAY	-0.185334	0.0182186
ESCA	SRSF3	HALLMARK_SPERMATOGENESIS	0.243423	0.00180014
ESCA	SRSF3	HALLMARK_TGF_BETA_SIGNALING	-0.359458	2.63e-06
ESCA	SRSF3	HALLMARK_TNFA_SIGNALING_VIA_NFKB	-0.185482	0.0181247
ESCA	SRSF3	HALLMARK_UV_RESPONSE_DN	-0.185876	0.0178762
ESCA	SRSF3	HALLMARK_UV_RESPONSE_UP	0.279797	0.000311012
ESCA	SRSF3	HALLMARK_XENOBIOTIC_METABOLISM	0.168435	0.0321489
ESCA	SRSF4	HALLMARK_ADIPOGENESIS	-0.187098	0.0171244
ESCA	SRSF4	HALLMARK_ANDROGEN_RESPONSE	-0.185827	0.0179068
ESCA	SRSF4	HALLMARK_E2F_TARGETS	0.161341	0.040258
ESCA	SRSF4	HALLMARK_ESTROGEN_RESPONSE_EARLY	-0.208618	0.00771979
ESCA	SRSF4	HALLMARK_INTERFERON_ALPHA_RESPONSE	0.179208	0.0225021
ESCA	SRSF4	HALLMARK_INTERFERON_GAMMA_RESPONSE	0.18902	0.0159982
ESCA	SRSF4	HALLMARK_NOTCH_SIGNALING	-0.175963	0.0251033
ESCA	SRSF4	HALLMARK_PI3K_AKT_MTOR_SIGNALING	0.218904	0.00513171
ESCA	SRSF4	HALLMARK_UNFOLDED_PROTEIN_RESPONSE	-0.259878	0.000838807
ESCA	SRSF5	HALLMARK_GLYCOLYSIS	-0.261143	0.000789332
ESCA	SRSF5	HALLMARK_MYC_TARGETS_V2	-0.298439	0.00011461
ESCA	SRSF5	HALLMARK_PROTEIN_SECRETION	0.224564	0.00406748
ESCA	SRSF5	HALLMARK_TGF_BETA_SIGNALING	0.175599	0.0254112
ESCA	SRSF6	HALLMARK_ANGIOGENESIS	0.204856	0.00892283
ESCA	SRSF6	HALLMARK_APICAL_JUNCTION	-0.291228	0.000170008
ESCA	SRSF6	HALLMARK_APICAL_SURFACE	-0.248491	0.00143043
ESCA	SRSF6	HALLMARK_APOPTOSIS	-0.258044	0.000915586
ESCA	SRSF6	HALLMARK_BILE_ACID_METABOLISM	0.288368	0.000198226
ESCA	SRSF6	HALLMARK_COAGULATION	0.330446	1.75e-05
ESCA	SRSF6	HALLMARK_DNA_REPAIR	0.173247	0.0274757
ESCA	SRSF6	HALLMARK_E2F_TARGETS	0.258889	0.000879452
ESCA	SRSF6	HALLMARK_FATTY_ACID_METABOLISM	0.192127	0.0143132
ESCA	SRSF6	HALLMARK_G2M_CHECKPOINT	0.217851	0.0053553
ESCA	SRSF6	HALLMARK_HYPOXIA	-0.254861	0.00106433
ESCA	SRSF6	HALLMARK_INFLAMMATORY_RESPONSE	-0.238194	0.00227102
ESCA	SRSF6	HALLMARK_KRAS_SIGNALING_DN	-0.398802	1.47e-07
ESCA	SRSF6	HALLMARK_MITOTIC_SPINDLE	0.25116	0.00126491
ESCA	SRSF6	HALLMARK_MTORC1_SIGNALING	-0.224536	0.0040721
ESCA	SRSF6	HALLMARK_MYOGENESIS	-0.196688	0.012121
ESCA	SRSF6	HALLMARK_P53_PATHWAY	-0.393291	2.25e-07
ESCA	SRSF6	HALLMARK_PANCREAS_BETA_CELLS	0.233321	0.00280767
ESCA	SRSF6	HALLMARK_PEROXISOME	0.326324	2.26e-05
ESCA	SRSF6	HALLMARK_PI3K_AKT_MTOR_SIGNALING	-0.158681	0.0437121
ESCA	SRSF6	HALLMARK_REACTIVE_OXYGEN_SPECIES_PATHWAY	-0.20051	0.0105171
ESCA	SRSF6	HALLMARK_TNFA_SIGNALING_VIA_NFKB	-0.163367	0.0377839
ESCA	SRSF6	HALLMARK_XENOBIOTIC_METABOLISM	0.205918	0.0085674
ESCA	SRSF7	HALLMARK_ANDROGEN_RESPONSE	-0.180809	0.0213061
ESCA	SRSF7	HALLMARK_APICAL_JUNCTION	-0.23005	0.00322965
ESCA	SRSF7	HALLMARK_APOPTOSIS	-0.338815	1.03e-05
ESCA	SRSF7	HALLMARK_BILE_ACID_METABOLISM	0.167829	0.0327819
ESCA	SRSF7	HALLMARK_COAGULATION	0.236335	0.00246361
ESCA	SRSF7	HALLMARK_DNA_REPAIR	0.400694	1.27e-07
ESCA	SRSF7	HALLMARK_E2F_TARGETS	0.517148	1.84e-12
ESCA	SRSF7	HALLMARK_EPITHELIAL_MESENCHYMAL_TRANSITION	-0.179758	0.0220847
ESCA	SRSF7	HALLMARK_ESTROGEN_RESPONSE_EARLY	-0.234005	0.00272603
ESCA	SRSF7	HALLMARK_FATTY_ACID_METABOLISM	0.228006	0.00352159
ESCA	SRSF7	HALLMARK_G2M_CHECKPOINT	0.437049	6.07e-09
ESCA	SRSF7	HALLMARK_GLYCOLYSIS	0.307359	6.94e-05
ESCA	SRSF7	HALLMARK_HYPOXIA	-0.169503	0.0310569
ESCA	SRSF7	HALLMARK_INFLAMMATORY_RESPONSE	-0.204708	0.00897333
ESCA	SRSF7	HALLMARK_INTERFERON_GAMMA_RESPONSE	-0.154846	0.0491272
ESCA	SRSF7	HALLMARK_KRAS_SIGNALING_DN	-0.260283	0.00082266
ESCA	SRSF7	HALLMARK_KRAS_SIGNALING_UP	-0.169504	0.0310555
ESCA	SRSF7	HALLMARK_MITOTIC_SPINDLE	0.183942	0.0191244
ESCA	SRSF7	HALLMARK_MYC_TARGETS_V2	0.41923	2.82e-08
ESCA	SRSF7	HALLMARK_MYOGENESIS	-0.162356	0.0390018
ESCA	SRSF7	HALLMARK_P53_PATHWAY	-0.293246	0.000152406
ESCA	SRSF7	HALLMARK_PEROXISOME	0.397147	1.67e-07
ESCA	SRSF7	HALLMARK_PROTEIN_SECRETION	-0.410449	5.81e-08
ESCA	SRSF7	HALLMARK_SPERMATOGENESIS	0.216376	0.00568293
ESCA	SRSF7	HALLMARK_TGF_BETA_SIGNALING	-0.399299	1.41e-07
ESCA	SRSF7	HALLMARK_TNFA_SIGNALING_VIA_NFKB	-0.232268	0.00293768
ESCA	SRSF7	HALLMARK_UV_RESPONSE_DN	-0.248219	0.00144832
ESCA	SRSF7	HALLMARK_UV_RESPONSE_UP	0.241425	0.00196844
ESCA	SRSF7	HALLMARK_XENOBIOTIC_METABOLISM	0.168269	0.0323208
ESCA	SRSF8	HALLMARK_ADIPOGENESIS	0.319022	3.51e-05
ESCA	SRSF8	HALLMARK_ANDROGEN_RESPONSE	0.208852	0.00764973
ESCA	SRSF8	HALLMARK_APICAL_SURFACE	-0.282114	0.000275745
ESCA	SRSF8	HALLMARK_BILE_ACID_METABOLISM	0.26272	0.000731446
ESCA	SRSF8	HALLMARK_COAGULATION	0.210813	0.00708617
ESCA	SRSF8	HALLMARK_ESTROGEN_RESPONSE_EARLY	0.186465	0.0175108
ESCA	SRSF8	HALLMARK_FATTY_ACID_METABOLISM	0.245382	0.001648
ESCA	SRSF8	HALLMARK_HYPOXIA	-0.341331	8.79e-06
ESCA	SRSF8	HALLMARK_INFLAMMATORY_RESPONSE	-0.203224	0.00949468
ESCA	SRSF8	HALLMARK_INTERFERON_GAMMA_RESPONSE	-0.17148	0.029119
ESCA	SRSF8	HALLMARK_KRAS_SIGNALING_DN	-0.246833	0.00154296
ESCA	SRSF8	HALLMARK_MTORC1_SIGNALING	-0.175002	0.0259217
ESCA	SRSF8	HALLMARK_NOTCH_SIGNALING	0.259128	0.000869459
ESCA	SRSF8	HALLMARK_OXIDATIVE_PHOSPHORYLATION	0.256128	0.00100265
ESCA	SRSF8	HALLMARK_P53_PATHWAY	-0.1828	0.0198962
ESCA	SRSF8	HALLMARK_PANCREAS_BETA_CELLS	0.219213	0.00506787
ESCA	SRSF8	HALLMARK_PEROXISOME	0.210364	0.00721199
ESCA	SRSF8	HALLMARK_PI3K_AKT_MTOR_SIGNALING	-0.195189	0.0128068
ESCA	SRSF8	HALLMARK_PROTEIN_SECRETION	0.211509	0.00689519
ESCA	SRSF8	HALLMARK_TNFA_SIGNALING_VIA_NFKB	-0.15758	0.0452127
ESCA	SRSF8	HALLMARK_XENOBIOTIC_METABOLISM	0.24977	0.00134876
ESCA	SRSF9	HALLMARK_ALLOGRAFT_REJECTION	-0.21863	0.00518913
ESCA	SRSF9	HALLMARK_ANDROGEN_RESPONSE	-0.295792	0.000132623
ESCA	SRSF9	HALLMARK_APICAL_SURFACE	0.2482	0.00144959
ESCA	SRSF9	HALLMARK_APOPTOSIS	-0.249085	0.00139195
ESCA	SRSF9	HALLMARK_COMPLEMENT	-0.227736	0.00356193
ESCA	SRSF9	HALLMARK_DNA_REPAIR	0.42658	1.51e-08
ESCA	SRSF9	HALLMARK_E2F_TARGETS	0.501615	1.05e-11
ESCA	SRSF9	HALLMARK_G2M_CHECKPOINT	0.461121	6.61e-10
ESCA	SRSF9	HALLMARK_GLYCOLYSIS	0.398195	1.54e-07
ESCA	SRSF9	HALLMARK_HEDGEHOG_SIGNALING	0.216276	0.00570588
ESCA	SRSF9	HALLMARK_HEME_METABOLISM	0.252424	0.00119281
ESCA	SRSF9	HALLMARK_IL2_STAT5_SIGNALING	-0.187549	0.0168543
ESCA	SRSF9	HALLMARK_IL6_JAK_STAT3_SIGNALING	-0.250055	0.00133114
ESCA	SRSF9	HALLMARK_INTERFERON_ALPHA_RESPONSE	-0.305659	7.64e-05
ESCA	SRSF9	HALLMARK_INTERFERON_GAMMA_RESPONSE	-0.303346	8.71e-05
ESCA	SRSF9	HALLMARK_KRAS_SIGNALING_UP	-0.413003	4.71e-08
ESCA	SRSF9	HALLMARK_MITOTIC_SPINDLE	0.178151	0.0233227
ESCA	SRSF9	HALLMARK_MTORC1_SIGNALING	0.2798	0.000310968
ESCA	SRSF9	HALLMARK_MYC_TARGETS_V2	0.530374	3.91e-13
ESCA	SRSF9	HALLMARK_NOTCH_SIGNALING	-0.210081	0.00729207
ESCA	SRSF9	HALLMARK_PANCREAS_BETA_CELLS	-0.226639	0.00372998
ESCA	SRSF9	HALLMARK_PEROXISOME	0.280337	0.000302437
ESCA	SRSF9	HALLMARK_PI3K_AKT_MTOR_SIGNALING	0.313452	4.88e-05
ESCA	SRSF9	HALLMARK_PROTEIN_SECRETION	-0.480329	9.91e-11
ESCA	SRSF9	HALLMARK_SPERMATOGENESIS	0.200392	0.0105635
ESCA	SRSF9	HALLMARK_TGF_BETA_SIGNALING	-0.441497	4.08e-09
ESCA	SRSF9	HALLMARK_TNFA_SIGNALING_VIA_NFKB	-0.289465	0.000186921
ESCA	SRSF9	HALLMARK_UV_RESPONSE_DN	-0.315291	4.38e-05
ESCA	SRSF9	HALLMARK_UV_RESPONSE_UP	0.313263	4.93e-05
ESCA	SRSF9	HALLMARK_WNT_BETA_CATENIN_SIGNALING	0.220438	0.00482106
ESCA	SRSF9	HALLMARK_XENOBIOTIC_METABOLISM	0.168167	0.0324279
GBM	SRSF1	HALLMARK_ADIPOGENESIS	-0.51467	9.56e-13
GBM	SRSF1	HALLMARK_ALLOGRAFT_REJECTION	-0.368156	9.12e-07
GBM	SRSF1	HALLMARK_ANGIOGENESIS	-0.244717	0.00138884
GBM	SRSF1	HALLMARK_APICAL_JUNCTION	0.439837	2.44e-09
GBM	SRSF1	HALLMARK_APICAL_SURFACE	0.25382	0.000900646
GBM	SRSF1	HALLMARK_APOPTOSIS	-0.554057	6.67e-15
GBM	SRSF1	HALLMARK_CHOLESTEROL_HOMEOSTASIS	-0.183488	0.0172765
GBM	SRSF1	HALLMARK_COMPLEMENT	-0.432828	4.64e-09
GBM	SRSF1	HALLMARK_DNA_REPAIR	0.287665	0.000156224
GBM	SRSF1	HALLMARK_E2F_TARGETS	0.662968	1.25e-22
GBM	SRSF1	HALLMARK_EPITHELIAL_MESENCHYMAL_TRANSITION	-0.278278	0.000259817
GBM	SRSF1	HALLMARK_ESTROGEN_RESPONSE_EARLY	0.399228	8.3e-08
GBM	SRSF1	HALLMARK_ESTROGEN_RESPONSE_LATE	0.293263	0.00011436
GBM	SRSF1	HALLMARK_FATTY_ACID_METABOLISM	-0.223008	0.00366524
GBM	SRSF1	HALLMARK_G2M_CHECKPOINT	0.727183	6.36e-29
GBM	SRSF1	HALLMARK_HEDGEHOG_SIGNALING	0.376318	4.98e-07
GBM	SRSF1	HALLMARK_HYPOXIA	-0.388481	1.96e-07
GBM	SRSF1	HALLMARK_IL2_STAT5_SIGNALING	-0.345318	4.56e-06
GBM	SRSF1	HALLMARK_IL6_JAK_STAT3_SIGNALING	-0.432279	4.88e-09
GBM	SRSF1	HALLMARK_INFLAMMATORY_RESPONSE	-0.457394	4.58e-10
GBM	SRSF1	HALLMARK_INTERFERON_ALPHA_RESPONSE	-0.256073	0.000807093
GBM	SRSF1	HALLMARK_INTERFERON_GAMMA_RESPONSE	-0.364702	1.17e-06
GBM	SRSF1	HALLMARK_KRAS_SIGNALING_UP	-0.350732	3.15e-06
GBM	SRSF1	HALLMARK_MITOTIC_SPINDLE	0.731149	2.27e-29
GBM	SRSF1	HALLMARK_MYC_TARGETS_V1	0.308484	4.74e-05
GBM	SRSF1	HALLMARK_MYC_TARGETS_V2	0.465653	2.01e-10
GBM	SRSF1	HALLMARK_MYOGENESIS	0.187815	0.0147719
GBM	SRSF1	HALLMARK_NOTCH_SIGNALING	0.28847	0.00014943
GBM	SRSF1	HALLMARK_P53_PATHWAY	-0.400632	7.4e-08
GBM	SRSF1	HALLMARK_PI3K_AKT_MTOR_SIGNALING	0.166813	0.0306821
GBM	SRSF1	HALLMARK_PROTEIN_SECRETION	-0.22293	0.0036776
GBM	SRSF1	HALLMARK_REACTIVE_OXYGEN_SPECIES_PATHWAY	-0.548714	1.36e-14
GBM	SRSF1	HALLMARK_TNFA_SIGNALING_VIA_NFKB	-0.410969	3.14e-08
GBM	SRSF1	HALLMARK_UNFOLDED_PROTEIN_RESPONSE	0.164814	0.0327682
GBM	SRSF1	HALLMARK_UV_RESPONSE_DN	0.170209	0.0273974
GBM	SRSF1	HALLMARK_WNT_BETA_CATENIN_SIGNALING	0.507911	2.1e-12
GBM	SRSF1	HALLMARK_XENOBIOTIC_METABOLISM	-0.157849	0.0410017
GBM	SRSF10	HALLMARK_ADIPOGENESIS	-0.479368	4.91e-11
GBM	SRSF10	HALLMARK_ALLOGRAFT_REJECTION	-0.187837	0.01476
GBM	SRSF10	HALLMARK_ANGIOGENESIS	-0.181816	0.018339
GBM	SRSF10	HALLMARK_APICAL_JUNCTION	0.219295	0.00429001
GBM	SRSF10	HALLMARK_APICAL_SURFACE	0.360824	1.55e-06
GBM	SRSF10	HALLMARK_APOPTOSIS	-0.424317	9.93e-09
GBM	SRSF10	HALLMARK_CHOLESTEROL_HOMEOSTASIS	-0.185031	0.0163439
GBM	SRSF10	HALLMARK_COMPLEMENT	-0.279387	0.000244891
GBM	SRSF10	HALLMARK_DNA_REPAIR	0.225158	0.00334234
GBM	SRSF10	HALLMARK_E2F_TARGETS	0.581614	1.37e-16
GBM	SRSF10	HALLMARK_EPITHELIAL_MESENCHYMAL_TRANSITION	-0.221896	0.00384321
GBM	SRSF10	HALLMARK_ESTROGEN_RESPONSE_EARLY	0.228186	0.00293089
GBM	SRSF10	HALLMARK_G2M_CHECKPOINT	0.625415	1.28e-19
GBM	SRSF10	HALLMARK_HEDGEHOG_SIGNALING	0.197812	0.0101626
GBM	SRSF10	HALLMARK_HYPOXIA	-0.366126	1.06e-06
GBM	SRSF10	HALLMARK_IL2_STAT5_SIGNALING	-0.242571	0.00153458
GBM	SRSF10	HALLMARK_IL6_JAK_STAT3_SIGNALING	-0.263995	0.000544666
GBM	SRSF10	HALLMARK_INFLAMMATORY_RESPONSE	-0.300345	7.64e-05
GBM	SRSF10	HALLMARK_INTERFERON_GAMMA_RESPONSE	-0.158368	0.0403335
GBM	SRSF10	HALLMARK_KRAS_SIGNALING_UP	-0.253216	0.000927347
GBM	SRSF10	HALLMARK_MITOTIC_SPINDLE	0.543568	2.67e-14
GBM	SRSF10	HALLMARK_MYC_TARGETS_V1	0.267047	0.000466566
GBM	SRSF10	HALLMARK_MYC_TARGETS_V2	0.383359	2.91e-07
GBM	SRSF10	HALLMARK_OXIDATIVE_PHOSPHORYLATION	-0.162896	0.0348823
GBM	SRSF10	HALLMARK_P53_PATHWAY	-0.453464	6.72e-10
GBM	SRSF10	HALLMARK_PROTEIN_SECRETION	-0.175505	0.0228749
GBM	SRSF10	HALLMARK_REACTIVE_OXYGEN_SPECIES_PATHWAY	-0.579923	1.76e-16
GBM	SRSF10	HALLMARK_TGF_BETA_SIGNALING	-0.229146	0.00281039
GBM	SRSF10	HALLMARK_TNFA_SIGNALING_VIA_NFKB	-0.328773	1.35e-05
GBM	SRSF10	HALLMARK_WNT_BETA_CATENIN_SIGNALING	0.339045	6.94e-06
GBM	SRSF11	HALLMARK_ADIPOGENESIS	-0.299158	8.18e-05
GBM	SRSF11	HALLMARK_ALLOGRAFT_REJECTION	-0.26853	0.00043248
GBM	SRSF11	HALLMARK_APICAL_JUNCTION	0.247047	0.00124492
GBM	SRSF11	HALLMARK_APICAL_SURFACE	0.319587	2.41e-05
GBM	SRSF11	HALLMARK_APOPTOSIS	-0.376966	4.74e-07
GBM	SRSF11	HALLMARK_BILE_ACID_METABOLISM	0.161841	0.0360936
GBM	SRSF11	HALLMARK_COMPLEMENT	-0.307058	5.16e-05
[truncated: 7,443 more rows]
